# Supplementary material for: Reaction condition-dependent divergent synthesis of spirooxindoles and bisoxindoles
Source: Royal Society of Chemistry journal article supplement (doi:10.1039/d1qo00575h), 2021-01-01

# Reaction Conditions-Dependent Divergent Synthesis of Spirooxindoles and Bisoxindoles

Guo-Shu Chen,<sup>a</sup> Yu-Bo Fang,<sup>a</sup> Zhi Ren,<sup>\*b</sup> Xu Tian,<sup>c</sup> and Yun-Lin Liu<sup>\*a</sup>

Email: ylliu@gzhu.edu.cn

## Table of Contents

|                                                                                                                  |     |
|------------------------------------------------------------------------------------------------------------------|-----|
| 1) General Information                                                                                           | S2  |
| 2) General procedure and spectral data of products <b>7</b>                                                      | S3  |
| 3) Optimization of the reaction conditions for the preparation of product <b>8a</b>                              | S7  |
| 4) General procedure and spectral data of products <b>8</b>                                                      | S8  |
| 5) Optimization of the reaction conditions for the preparation of product <b>9a</b>                              | S10 |
| 6) General procedure and spectral data of products <b>9</b>                                                      | S10 |
| 7) Control experiments                                                                                           | S14 |
| 8) ESI-MS studies                                                                                                | S16 |
| 9) Theoretical calculations                                                                                      | S18 |
| 10) X-Ray crystallographic data for compounds <b>7a</b> , <b>8d</b> , and <b>9a</b>                              | S30 |
| 11) Copies of <sup>1</sup> H NMR and <sup>13</sup> C NMR spectra of compounds <b>7</b> , <b>8</b> , and <b>9</b> | S33 |

## 1. General Information

Reactions were monitored by thin layer chromatography using UV light to visualize the course of reaction. Purification of reaction products was carried out by flash chromatography on silica gel. Chemical yields refer to pure isolated substances. <sup>1</sup>H and <sup>13</sup>C NMR spectra were obtained using a Bruker DPX-400 or DPX-500 spectrometer. Chemical shifts are reported in ppm from CDCl<sub>3</sub> with the solvent resonance as the internal standard. The following abbreviations were used to designate chemical shift multiplicities: s = singlet, d = doublet, t = triplet, q = quartet, h = heptet, m = multiplet, br = broad.

Anhydrous solvents such as CH<sub>2</sub>Cl<sub>2</sub>, ClCH<sub>2</sub>CH<sub>2</sub>Cl, CH<sub>3</sub>CN, THF, toluene and EtOAc were purchased from Energy Chemical. Unless otherwise stated, all purchased reagents were used without further purification. All reactions involving air- or moisture-sensitive compounds were carried out under nitrogen atmosphere in dried Schlenk tube. The MBH carbonates **1**,<sup>[1]</sup> 3-formylchromones **4**,<sup>[2]</sup> β-isocupreidine (β-ICD) and its derivatives<sup>[3]</sup> were prepared using the literature procedures.

All computational studies were performed with GAUSSIAN 16 suite.<sup>[4]</sup> The gas-phase calculations were conducted on M06-2x functional,<sup>[5]</sup> with the basis set 6-31G(d). All optimized structures in gas-phase were confirmed by frequency calculations, and intermediates have no negative frequency and transition states have only one negative frequency. In addition, transition states were verified by intrinsic reaction coordinate analysis (IRC) calculations. The effect of solvent was considered by the SMD solvent model.<sup>[6]</sup> The solution-phase calculations were performed using the single point calculation on the gas-phase geometries with the same functional using a larger basis set 6-311+G(2d,p).<sup>[7]</sup> Solution-state Gibbs free energies of all structures were corrected by using the gas-phase Gibbs free energy correction, and all these energies correspond to the reference state of 1 atmosphere at 298 K. The unit of Gibbs free energies is kcal/mol, and the unit of bond length is angstrom (Å). The images are generated by CYLview.

## References

- [1] a) Y. M. Chung, Y. J. Im, J. N. Kim, *Bull. Korean Chem. Soc.* **2002**, *23*, 1651-1654; b) N.-J. Zhong, F. Wei, Q.-Q. Xuan, L. Liu, D. Wang, Y.-J. Chen, *Chem. Commun.* **2013**, *49*, 11071-11073; c) K. Selvakumar, K. A. P. Lingam, R. V. L. Varma, *RSC Adv.* **2014**, *4*, 36538-36543; d) F. Wei, H.-Y. Huang, N.-J. Zhong, C.-L. Gu, D. Wang, L. Liu, *Org. Lett.* **2015**, *17*, 1688-1691; e) K.-K. Wang, P. Wang, Q. Ouyang, W. Du, Y.-C. Chen, *Chem. Commun.* **2016**, *52*, 11104-11107.
- [2] a) N. Sepay, S. P. Dey, *J. Heterocyclic Chem.* **2014**, *51*, E1-E24; b) S. J. Degen, K. L. Mueller, G. M. Golding, L.-L. Wei, C. A. Zifcsak, A. Neeno-Eckwall, R. P. Hsung, *Bioorg. Med. Chem. Lett.* **1999**, *9*, 973-978; c) B. C. Raju, R. N. Rao, P. Suman, P. Yogeewari, D. Sriram, T. B. Shaik, V. Kalivendi, *Bioorg. Med. Chem. Lett.* **2011**, *21*, 2855-2859; d) B. Baskar, P.-Y. Dakas, K. Kumar, *Org. Lett.* **2011**, *13*, 1988-1991; e) K. Wittstein, A. B. Garcia, M. Schürmann, K. Kumar, *Synlett* **2012**, *2012*, 227-232.
- [3] a) Y. Iwabuchi, M. Nakatani, N. Yokoyama, S. Hatakeyama, *J. Am. Chem. Soc.* **1999**, *121*, 10219-10220; b) A. Nakano, K. Takahashi, J. Ishihara, S. Hatakeyama, *Org. Lett.* **2006**, *8*, 5357-5360; c) J. Peng, X. Huang, L. Jiang, H.-L. Cui, Y.-C. Chen, *Org. Lett.* **2011**, *13*, 4584-4587; d) H. Waldmann, V. Khedkar, H. Dücker, M. Schürmann, I. M. Oppel, K. Kumar, *Angew. Chem. Int. Ed.* **2008**, *47*, 6869-6872; *Angew. Chem.* **2008**, *120*, 6975-6978; e) L. Laraia, K. Ohsawa, G. Konstantinidis, L. Robke, Y.-W. Wu, K. Kumar, H. Waldmann, *Angew. Chem. Int. Ed.* **2017**, *56*, 2145-2150; *Angew. Chem.* **2017**, *129*, 2177-2182.
- [4] Gaussian 16, Revision A. 03, M. J. Frisch, G. W. Trucks, H. B. Schlegel, G. E. Scuseria, M. A. Robb, J. R. Cheeseman, G. Scalmani, V. Barone, G. A. Petersson, H. Nakatsuji, X. Li, M. Caricato, A. V. Marenich, J. Bloino, B. G. Janesko, R. Gomperts, B. Mennucci, H. P. Hratchian, J. V. Ortiz, A. F. Izmaylov, J. L. Sonnenberg, D. Williams-Young, F. Ding, F. Lipparini, F. Egidi, J. Goings, B. Peng, A. Petrone, T. Henderson, D. Ranasinghe, V. G. Zakrzewski, J. Gao, N. Rega, G. Zheng, W. Liang, M. Hada, M. Ehara, K. Toyota, R. Fukuda, J. Hasegawa, M. Ishida, T. Nakajima, Y. Honda, O. Kitao, H. Nakai, T. Vreven, K. Throssell, J. A. Montgomery, J. E. Peralta, F. Ogliaro, M. J. Bearpark, J. J. Heyd, E. N. Brothers, K. N. Kudin, V. N. Staroverov, T. A. Keith, R. Kobayashi, J. Normand, K. Raghavachari, A. P. Rendell, J. C. Burant, S. S. Iyengar, J. Tomasi, M. Cossi, J. M. Millam, M. Klene, C. Adamo, R. Cammi, J. W. Ochterski, R. L. Martin, K. Morokuma, O. Farkas, J. B. Foresman, D. J. Fox, Gaussian, Inc., Wallingford CT, 2016.
- [5] a) Y. Zhao, N. E. Schultz, D. Truhlar, *J. Chem. Phys.* **2005**, *123*, 161103; b) Y. Zhao, N. E. Schultz, D. G. Truhlar, *J. Chem. Theory. Comput.* **2006**, *2*, 364-382; c) Y. Zhao, D. G. Truhlar, *J. Chem. Theory. Comput.* **2006**, *2*, 1009-1018; d) Y. Zhao, D. G. Truhlar, *Acc. Chem. Res.* **2008**, *41*, 157-167; e) Y. Zhao, D. G. Truhlar, *Theor. Chem. Acc.* **2008**, *120*, 215-241; f) Y. Zhao, D. G. Truhlar, *Chem. Phys. Lett.* **2011**, *502*, 1-13.
- [6] J. M. Um, D. A. DiRocco, E. L. Noey, T. Rovis, K. Houk, *J. Am. Chem. Soc.* **2011**, *133*, 11249-11254.
- [7] a) A. V. Marenich, C. J. Cramer, D. G. Truhlar, *J. Phys. Chem. B* **2009**, *113*, 6378-6396; b) R. F. Ribeiro, A. V. Marenich, C. J. Cramer, D. G. Truhlar, *J. Phys. Chem. B* **2011**, *115*, 14556-14562.

## 2. General procedure and spectral data of products 7

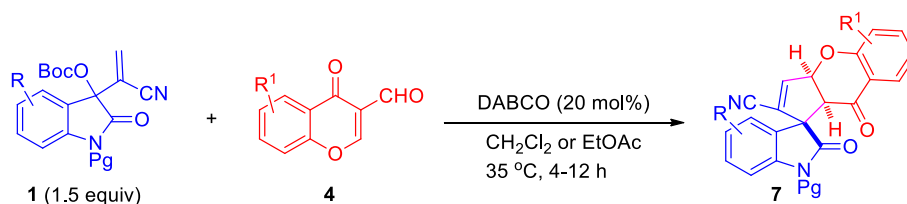

**General Procedure:** To a 10.0 mL Schlenk tube were successively added MBH carbonates **1** (0.15 mmol), 3-formylchromones **4** (0.1 mmol) and anhydrous  $\text{CH}_2\text{Cl}_2$  or EtOAc (1.0 mL). The reaction mixture was stirred vigorously at room temperature to ensure full dissolution of 3-formylchromones **4**. Then, 1,4-diaza bicyclo[2.2.2]octane (DABCO, 0.02 mmol) was added in one portion. The reaction mixture was stirred at 35 °C under  $\text{N}_2$  atmosphere for 4-12 h, and monitored by TLC. After completion, the reaction mixture was directly subjected to flash chromatography on silica gel using petroleum ether/EtOAc (from 10:1-1:1) as the eluent to afford the benzopyrone fused spirocyclopentene oxindoles **7**.

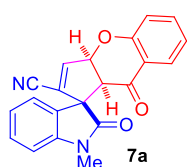

The reaction was run at 35 °C for 4 h by using  $\text{CH}_2\text{Cl}_2$  as the solvent, affording product **7a** in 95% yield as a white solid (m.p. 150-152 °C).  $^1\text{H NMR}$  (500 MHz,  $\text{CDCl}_3$ ):  $\delta$  7.72 (dd,  $J = 8.0, 2.0$  Hz, 1H), 7.53 (td,  $J = 9.0, 2.0$  Hz, 1H), 7.41 (td,  $J = 8.0, 1.5$  Hz, 1H), 7.20-7.15 (m, 3H), 7.06-7.02 (m, 2H), 6.93 (d,  $J = 7.5$  Hz, 1H), 5.77 (dd,  $J = 7.5, 2.5$  Hz, 1H), 3.59 (d,  $J = 8.0$  Hz, 1H), 3.18 (s, 3H);  $^{13}\text{C NMR}$  (125 MHz,  $\text{CDCl}_3$ ):  $\delta$  188.83, 172.04, 159.64, 146.30, 144.26, 136.91, 130.36, 127.07, 126.85, 124.43, 123.65, 122.92, 122.31, 121.53, 118.43, 112.48, 109.23, 80.91, 65.78, 54.88, 26.88. HRMS (ESI): Exact mass calcd for  $\text{C}_{21}\text{H}_{14}\text{N}_2\text{NaO}_3$  [ $\text{M}+\text{Na}$ ] $^+$ : 365.0895, Found: 365.0897.

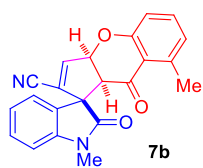

The reaction was run at 35 °C for 4 h by using  $\text{CH}_2\text{Cl}_2$  as the solvent, affording product **7b** in 86% yield as a white solid (m.p. 180-182 °C).  $^1\text{H NMR}$  (400 MHz,  $\text{CDCl}_3$ )  $\delta$  7.43-7.39 (m, 1H), 7.35 (t,  $J = 8.0$  Hz 1H), 7.19-7.15 (m, 2H), 7.14 (d,  $J = 2.8$  Hz, 1H), 6.95 (d,  $J = 8.0$  Hz, 1H), 6.91 (d,  $J = 8.0$  Hz, 1H), 6.85 (d,  $J = 7.6$  Hz, 1H), 5.68 (dd,  $J = 8.0, 2.8$  Hz, 1H), 3.65 (d,  $J = 8.0$  Hz, 1H), 3.23 (s, 3H), 2.47 (s, 3H);  $^{13}\text{C NMR}$  (100 MHz,  $\text{CDCl}_3$ )  $\delta$  190.72, 172.62, 160.82, 146.13, 144.23, 141.52, 135.42, 130.26, 127.50, 125.90, 124.56, 123.55, 122.83, 121.66, 116.50, 112.54, 109.27, 80.56, 65.43, 57.28, 26.93, 21.67; HRMS (ESI): Exact mass calcd for  $\text{C}_{22}\text{H}_{16}\text{N}_2\text{NaO}_3$  [ $\text{M}+\text{Na}$ ] $^+$ : 379.1053, Found: 379.1053.

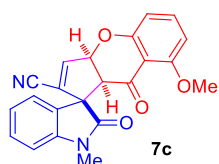

The reaction was run at 35 °C for 4 h by using  $\text{CH}_2\text{Cl}_2$  as the solvent, affording product **7c** in 84% yield as a white solid (m.p. 190-191 °C).  $^1\text{H NMR}$  (400 MHz,  $\text{CDCl}_3$ )  $\delta$  7.42-7.35 (m, 2H), 7.16-7.10 (m, 3H), 6.90 (d,  $J = 7.6$  Hz, 1H), 6.65 (d,  $J = 8.4$  Hz, 1H), 6.55 (d,  $J = 8.4$  Hz, 1H), 5.64 (dd,  $J = 8.0, 2.8$  Hz, 1H), 3.80 (s, 3H), 3.66 (d,  $J = 7.6$  Hz, 1H), 3.21 (s, 3H);  $^{13}\text{C NMR}$  (100 MHz,  $\text{CDCl}_3$ )  $\delta$  187.72, 172.63, 161.45, 160.02, 145.78, 144.40, 136.67, 130.07, 127.44, 124.79, 123.33, 122.79, 113.30, 110.64, 109.11, 105.38, 80.77, 65.15, 57.61, 56.05, 26.94; HRMS (ESI): Exact mass calcd for  $\text{C}_{22}\text{H}_{16}\text{N}_2\text{NaO}_4$  [ $\text{M}+\text{Na}$ ] $^+$ : 395.1002, Found: 395.1001.

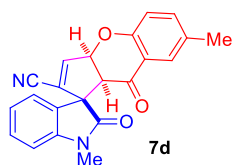

The reaction was run at 35 °C for 4 h by using  $\text{CH}_2\text{Cl}_2$  as the solvent, affording product **7d** in 90% yield as a white solid (m.p. 203-205 °C).  $^1\text{H NMR}$  (400 MHz,  $\text{CDCl}_3$ )  $\delta$  7.50 (d,  $J = 1.6$  Hz, 1H), 7.43-7.38 (m, 1H), 7.33 (dd,  $J = 8.8, 2.0$  Hz, 1H), 7.19-7.14 (m, 3H), 6.95-6.91 (m, 2H), 5.73 (dd,  $J = 8.0, 2.8$  Hz, 1H), 3.56 (d,  $J = 8.0$  Hz, 1H), 3.18 (s, 3H), 2.28 (s, 3H);  $^{13}\text{C NMR}$  (100 MHz,  $\text{CDCl}_3$ )  $\delta$  188.99, 172.09, 157.65, 146.50, 144.20, 138.03, 131.81, 130.31, 127.13, 126.42, 124.22, 123.63, 122.90, 121.11, 118.17, 112.52, 109.20, 80.77, 65.70, 54.86, 26.87, 20.41; HRMS (ESI): Exact mass calcd for  $\text{C}_{22}\text{H}_{16}\text{N}_2\text{NaO}_3$  [ $\text{M}+\text{Na}$ ] $^+$ : 379.1053, Found: 379.1049.

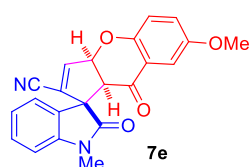

The reaction was run at 35 °C for 4 h by using  $\text{CH}_2\text{Cl}_2$  as the solvent, affording product **7e** in 82% yield as a white solid (m.p. 165-166 °C).  $^1\text{H NMR}$  (400 MHz,  $\text{CDCl}_3$ )  $\delta$  7.44-7.39 (m, 1H), 7.20-7.11 (m, 5H), 6.99-6.96 (m, 1H), 6.93 (d,  $J = 8.0$  Hz, 1H), 5.73 (dd,  $J = 8.0, 2.8$  Hz, 1H), 3.76 (s, 3H), 3.56 (d,  $J = 8.0$  Hz, 1H), 3.19 (s, 3H);  $^{13}\text{C NMR}$  (100 MHz,  $\text{CDCl}_3$ )  $\delta$  188.84, 172.08, 154.62, 154.20, 146.49, 144.21, 130.34, 127.12, 125.94, 124.23, 123.67, 122.92, 121.43, 119.71, 112.50, 109.20, 107.41, 80.81, 65.66, 55.67, 54.78, 26.90; HRMS (ESI): Exact mass calcd for  $\text{C}_{22}\text{H}_{16}\text{N}_2\text{NaO}_4$  [ $\text{M}+\text{Na}$ ] $^+$ : 395.1002, Found: 395.1001.

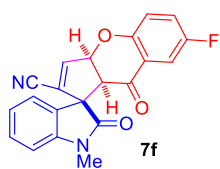

The reaction was run at 35 °C for 4 h by using EtOAc as the solvent, affording product **7f** in 62% yield as a white solid (m.p. 178-180 °C). <sup>1</sup>H NMR (400 MHz, CDCl<sub>3</sub>) δ 7.45-7.40 (m, 1H), 7.37 (dd, *J* = 8.0, 3.2 Hz, 1H), 7.28-7.22 (m, 1H), 7.20-7.15 (m, 3H), 7.03 (dd, *J* = 8.8, 4.0 Hz, 1H), 6.94 (d, *J* = 7.6 Hz, 1H), 5.77 (dd, *J* = 8.0, 2.8 Hz, 1H), 3.57 (d, *J* = 7.6 Hz, 1H), 3.19 (s, 3H); <sup>13</sup>C NMR (100 MHz, CDCl<sub>3</sub>) δ 188.27, 171.96, 157.62 (d, *J* = 241.9 Hz), 155.8 (d, *J* = 1.8 Hz), 146.07, 144.20, 130.50, 126.81, 124.52, 124.47 (d, *J* = 24.4 Hz), 123.77, 122.93, 121.81 (d, *J* = 6.8 Hz), 120.18 (d, *J* = 7.5 Hz), 112.22 (d, *J* = 27.9 Hz), 111.85, 109.34, 81.07, 65.80, 54.42 (d, *J* = 1.3 Hz), 26.92; HRMS (ESI): Exact mass calcd for C<sub>21</sub>H<sub>13</sub>FN<sub>2</sub>NaO<sub>3</sub> [M+Na]<sup>+</sup>: 383.0802, Found: 383.0801.

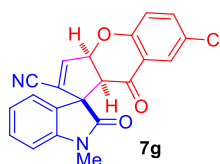

The reaction was run at 35 °C for 4 h by using EtOAc as the solvent, affording product **7g** in 55% yield as a white solid (m.p. 207-208 °C). <sup>1</sup>H NMR (400 MHz, CDCl<sub>3</sub>) δ 7.67 (d, *J* = 2.8 Hz, 1H), 7.46 (dd, *J* = 8.8, 2.8 Hz, 1H), 7.44-7.40 (m, 1H), 7.20-7.17 (m, 2H), 7.15 (d, *J* = 2.8 Hz, 1H), 7.00 (d, *J* = 8.8 Hz, 1H), 6.94 (d, *J* = 7.6 Hz, 1H), 5.77 (dd, *J* = 7.6, 2.8 Hz, 1H), 3.58 (d, *J* = 8.0 Hz, 1H), 3.18 (s, 3H); <sup>13</sup>C NMR (100 MHz, CDCl<sub>3</sub>) δ 187.85, 171.90, 158.03, 145.96, 144.18, 136.76, 130.52, 127.78, 126.72, 126.15, 124.56, 123.79, 122.94, 121.94, 120.14, 112.31, 109.35, 81.11, 65.89, 54.29, 26.91; HRMS (ESI): Exact mass calcd for C<sub>21</sub>H<sub>13</sub>ClN<sub>2</sub>NaO<sub>3</sub> [M+Na]<sup>+</sup>: 399.0507, Found: 399.0512.

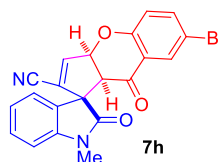

The reaction was run at 35 °C for 4 h by using EtOAc as the solvent, affording product **7h** in 65% yield as a white solid (m.p. 185-187 °C). <sup>1</sup>H NMR (400 MHz, CDCl<sub>3</sub>) δ 7.82 (d, *J* = 2.4 Hz, 1H), 7.59 (dd, *J* = 8.8, 2.8 Hz, 1H), 7.46-7.39 (m, 1H), 7.19-7.17 (m, 2H), 7.15 (d, *J* = 2.4 Hz, 1H), 6.94 (d, *J* = 8.8 Hz, 1H), 6.93 (d, *J* = 8.0 Hz, 1H), 5.76 (dd, *J* = 7.6, 2.8 Hz, 1H), 3.58 (d, *J* = 7.6 Hz, 1H), 3.18 (s, 3H); <sup>13</sup>C NMR (100 MHz, CDCl<sub>3</sub>) δ 187.70, 171.88, 158.48, 145.94, 145.90, 144.16, 139.53, 130.52, 129.22, 126.68, 124.55, 123.79, 122.93, 122.38, 120.45, 114.95, 112.30, 109.35, 81.09, 65.89, 54.24, 26.92; HRMS (ESI): Exact mass calcd for C<sub>21</sub>H<sub>13</sub>BrN<sub>2</sub>NaO<sub>3</sub> [M+Na]<sup>+</sup>: 443.0002, Found: 442.9993.

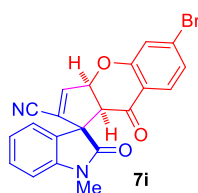

The reaction was run at 35 °C for 4 h by using EtOAc as the solvent, affording product **7i** in 67% yield as a white solid (m.p. 215-217 °C). <sup>1</sup>H NMR (400 MHz, CDCl<sub>3</sub>) δ 7.58 (d, *J* = 8.4 Hz, 1H), 7.44-7.40 (m, 1H), 7.24-7.23 (m, 1H), 7.20-7.15 (m, 4H), 6.93 (d, *J* = 7.6 Hz, 1H), 5.78 (dd, *J* = 8.0, 2.8 Hz, 1H), 3.58 (d, *J* = 7.6 Hz, 1H), 3.17 (s, 3H); <sup>13</sup>C NMR (100 MHz, CDCl<sub>3</sub>) δ 187.99, 171.88, 159.77, 144.19, 131.64, 130.50, 128.02, 126.74, 125.92, 124.68, 123.78, 122.94, 121.60, 120.08, 112.32, 109.33, 81.33, 65.87, 54.42, 26.91; HRMS (ESI): Exact mass calcd for C<sub>21</sub>H<sub>13</sub>BrN<sub>2</sub>NaO<sub>3</sub> [M+Na]<sup>+</sup>: 443.0002, Found: 443.0010.

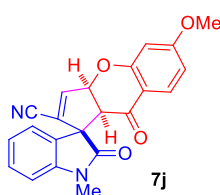

The reaction was run at 35 °C for 4 h by using CH<sub>2</sub>Cl<sub>2</sub> as the solvent, affording product **7j** in 71% yield as a white solid (m.p. 165-167 °C). <sup>1</sup>H NMR (400 MHz, DMSO-*d*<sub>6</sub>) δ 7.64 (d, *J* = 2.8 Hz, 1H), 7.52 (d, *J* = 8.8 Hz, 1H), 7.43 (d, *J* = 7.6 Hz, 2H), 7.19 (dt, *J* = 7.6 Hz, 1.0 Hz, 1H), 7.13 (d, *J* = 7.6 Hz, 1H), 6.64 (dd, *J* = 8.8, 2.4 Hz, 1H), 6.58 (d, *J* = 2.4 Hz, 1H), 5.90 (dd, *J* = 8.0, 2.8 Hz, 1H), 3.93 (d, *J* = 8.0 Hz, 1H), 3.84 (s, 3H), 3.09 (s, 3H); <sup>13</sup>C NMR (100 MHz, DMSO-*d*<sub>6</sub>) δ 187.89, 172.72, 166.62, 162.11, 149.40, 144.32, 130.38, 128.52, 128.22, 124.06, 123.78, 122.28, 115.48, 113.72, 110.71, 109.73, 101.69, 82.19, 65.63, 56.41, 54.02, 27.00; HRMS (ESI): Exact mass calcd for C<sub>22</sub>H<sub>16</sub>N<sub>2</sub>NaO<sub>4</sub> [M+Na]<sup>+</sup>: 395.1002, Found: 395.0994.

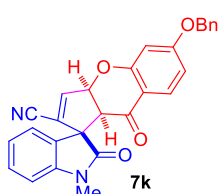

The reaction was run at 35 °C for 4 h by using CH<sub>2</sub>Cl<sub>2</sub> as the solvent, affording product **7k** in 83% yield as a white solid (m.p. 232-234 °C). <sup>1</sup>H NMR (400 MHz, CDCl<sub>3</sub>) δ 7.68 (d, *J* = 8.8 Hz, 1H), 7.42-7.36 (m, 6H), 7.20-7.14 (m, 3H), 6.92 (d, *J* = 7.6 Hz, 1H), 6.66 (dd, *J* = 8.8, 2.4 Hz, 1H), 6.54 (d, *J* = 2.4 Hz, 1H), 5.75 (dd, *J* = 7.6, 2.8 Hz, 1H), 5.09 (s, 2H), 3.53 (d, *J* = 8.0 Hz, 1H), 3.18 (s, 3H); <sup>13</sup>C NMR (100 MHz, CDCl<sub>3</sub>) δ 186.77, 171.98, 165.95, 161.70, 146.31, 144.24, 135.68, 130.31, 128.74, 128.37, 127.52, 127.08, 124.55, 123.65, 122.92, 115.30, 112.53, 111.47, 109.20, 102.07, 81.20, 70.43, 65.61, 54.50, 26.90; HRMS (ESI): Exact mass calcd for C<sub>28</sub>H<sub>20</sub>N<sub>2</sub>NaO<sub>4</sub> [M+Na]<sup>+</sup>: 471.1315, Found: 471.1316.

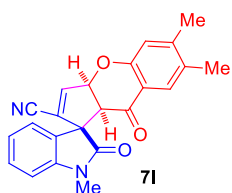

The reaction was run at 35 °C for 4 h by using CH<sub>2</sub>Cl<sub>2</sub> as the solvent, affording product **7l** in 65% yield as a white solid (m.p. 160-162 °C). <sup>1</sup>H NMR (400 MHz, CDCl<sub>3</sub>) δ 7.45 (s, 1H), 7.43-7.38 (m, 1H), 7.20-7.14 (m, 3H), 6.92 (d, *J* = 8.0 Hz, 1H), 6.82 (s, 1H), 5.72 (dd, *J* = 7.6, 2.8 Hz, 1H), 3.53 (d, *J* = 7.6 Hz, 1H), 3.17 (s, 3H), 2.26 (s, 3H), 2.18 (s, 3H); <sup>13</sup>C NMR (100 MHz, CDCl<sub>3</sub>) δ 188.34, 172.06, 157.94, 147.84, 146.64, 144.24, 130.99, 130.28, 127.18, 126.80, 124.25, 123.63, 122.92, 119.14, 118.79, 112.58, 109.18, 80.73, 65.66, 54.76, 26.88, 20.60, 18.80; HRMS (ESI): Exact mass calcd for C<sub>23</sub>H<sub>18</sub>N<sub>2</sub>NaO<sub>3</sub> [M+Na]<sup>+</sup>: 393.1210,

Found: 393.1212.

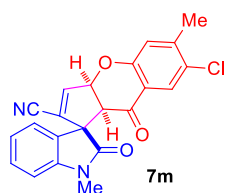

The reaction was run at 35 °C for 4 h by using CH<sub>2</sub>Cl<sub>2</sub> as the solvent, affording product **7m** in 72% yield as a white solid (m.p. 150-152 °C). <sup>1</sup>H NMR (400 MHz, CDCl<sub>3</sub>) δ 7.67 (s, 1H), 7.44-7.39 (m, 1H), 7.19-7.15 (m, 3H), 6.94-6.92 (m, 2H), 5.75 (dd, *J* = 8.0, 2.8 Hz, 1H), 3.54 (d, *J* = 7.6 Hz, 1H), 3.17 (s, 3H), 2.38 (s, 3H); <sup>13</sup>C NMR (100 MHz, CDCl<sub>3</sub>) δ 187.40, 171.88, 157.87, 146.34, 146.13, 144.20, 130.47, 128.46, 126.79, 126.51, 124.55, 123.77, 122.94, 120.39, 120.07, 112.39, 109.31, 81.03, 65.80, 54.25, 26.91, 20.95; HRMS (ESI): Exact mass calcd for C<sub>22</sub>H<sub>15</sub>ClN<sub>2</sub>NaO<sub>3</sub> [M+Na]<sup>+</sup>: 413.0663, Found: 413.0659.

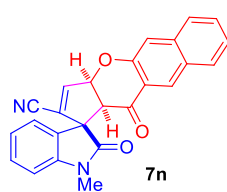

The reaction was run at 35 °C for 4 h by using CH<sub>2</sub>Cl<sub>2</sub> as the solvent, affording product **7n** in 66% yield as a white solid (m.p. 192-194 °C). <sup>1</sup>H NMR (400 MHz, CDCl<sub>3</sub>) δ 8.37 (d, *J* = 8.0 Hz, 1H), 7.78 (d, *J* = 8.4 Hz, 1H), 7.69 (d, *J* = 8.8 Hz, 1H), 7.66-7.61 (m, 1H), 7.57-7.53 (m, 1H), 7.45-7.40 (m, 2H), 7.33 (d, *J* = 2.4 Hz, 1H), 7.24-7.16 (m, 2H), 6.93 (d, *J* = 8.0 Hz, 1H), 5.95 (dd, *J* = 8.0, 2.8 Hz, 1H), 3.70 (d, *J* = 8.4 Hz, 1H), 3.16 (s, 3H); <sup>13</sup>C NMR (100 MHz, CDCl<sub>3</sub>) δ 187.92, 171.93, 158.03, 146.15, 144.26, 137.93, 130.38, 130.10, 127.86, 127.01, 126.42, 124.79, 124.73, 123.88, 123.68, 122.98, 121.87, 121.21, 115.86, 112.52, 109.25, 81.59,

65.85, 54.48, 26.88; HRMS (ESI): Exact mass calcd for C<sub>25</sub>H<sub>16</sub>N<sub>2</sub>NaO<sub>3</sub> [M+Na]<sup>+</sup>: 415.1053, Found: 415.1055.

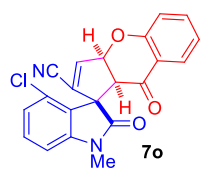

The reaction was run at 35 °C for 4 h by using EtOAc as the solvent, affording product **7o** in 64% yield as a white solid (m.p. 170-172 °C). <sup>1</sup>H NMR (400 MHz, CDCl<sub>3</sub>) δ 7.71 (dd, *J* = 8.0, 1.6 Hz, 1H), 7.55-7.51 (m, 1H), 7.37 (t, *J* = 8.0 Hz, 1H), 7.23 (d, *J* = 2.8 Hz, 1H), 7.09 (dd, *J* = 8.4, 1.0 Hz, 1H), 7.06-7.02 (m, 2H), 6.85 (d, *J* = 8.0 Hz, 1H), 5.83 (dd, *J* = 8.4, 2.8 Hz, 1H), 4.13 (d, *J* = 8.0 Hz, 1H), 3.18 (s, 3H); <sup>13</sup>C NMR (100 MHz, CDCl<sub>3</sub>) δ 189.42, 171.66, 159.66, 147.32, 146.00, 136.97, 131.61, 130.63, 126.80, 124.27, 122.73, 122.31, 121.61,

118.46, 112.33, 107.76, 80.87, 66.10, 51.06, 27.15; HRMS (ESI): Exact mass calcd for C<sub>21</sub>H<sub>13</sub>ClN<sub>2</sub>NaO<sub>3</sub> [M+Na]<sup>+</sup>: 399.0507, Found: 399.0508.

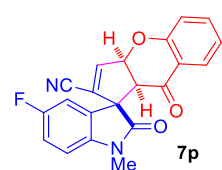

The reaction was run at 35 °C for 12 h by using EtOAc as the solvent, affording product **7p** in 86% yield as a white solid (m.p. 150-151 °C). <sup>1</sup>H NMR (400 MHz, CDCl<sub>3</sub>) δ 7.72 (dd, *J* = 8.0, 1.6 Hz, 1H), 7.56-7.51 (m, 1H), 7.20 (d, *J* = 2.8 Hz, 1H), 7.13 (td, *J* = 8.8, 2.8 Hz, 1H), 7.07-7.03 (m, 2H), 6.96 (dd, *J* = 7.2, 2.4 Hz, 1H), 6.87 (dd, *J* = 8.8, 4.0 Hz, 1H), 5.77 (dd, *J* = 8.0, 2.8 Hz, 1H), 3.55 (d, *J* = 8.0 Hz, 1H), 3.17 (s, 3H); <sup>13</sup>C NMR (100 MHz, CDCl<sub>3</sub>) δ 188.68, 171.78, 159.67 (d, *J* = 241.6 Hz), 159.64, 146.75, 140.22, 137.10, 128.44 (d, *J* = 7.8 Hz), 126.88, 123.83, 122.43, 121.43, 118.47, 116.79 (d, *J* = 23.2 Hz), 112.26, 111.30 (d, *J* = 25.2 Hz), 109.96 (d, *J* = 8.1 Hz), 80.74,

65.91, 54.81, 27.06; HRMS (ESI): Exact mass calcd for C<sub>21</sub>H<sub>13</sub>FN<sub>2</sub>NaO<sub>3</sub> [M+Na]<sup>+</sup>: 383.0802, Found: 383.0810.

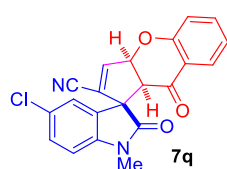

The reaction was run at 35 °C for 8 h by using EtOAc as the solvent, affording product **7q** in 64% yield as a white solid (m.p. 185-187 °C). <sup>1</sup>H NMR (400 MHz, CDCl<sub>3</sub>) δ 7.72 (dd, *J* = 8.0 Hz, 1.6 Hz, 1H), 7.56-7.51 (m, 1H), 7.39 (dd, *J* = 8.4, 2.0 Hz, 1H), 7.19 (s, 2H), 7.07-7.03 (m, 2H), 6.86 (d, *J* = 8.4 Hz, 1H), 5.76 (dd, *J* = 8.0, 2.8 Hz, 1H), 3.57 (d, *J* = 8.0 Hz, 1H), 3.17 (s, 3H); <sup>13</sup>C NMR (100 MHz, CDCl<sub>3</sub>) δ 188.66, 171.68, 159.62, 146.81, 142.83, 137.09, 130.37, 128.99, 128.64, 126.87, 123.70, 123.63, 122.45, 121.45, 118.46, 112.25,

110.22, 80.72, 65.65, 54.86, 27.03; Exact mass calcd for C<sub>21</sub>H<sub>13</sub>ClN<sub>2</sub>NaO<sub>3</sub> [M+Na]<sup>+</sup>: 399.0507, Found: 399.0502.

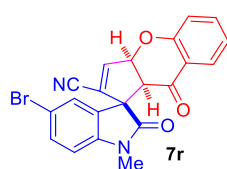

The reaction was run at 35 °C for 8 h by using EtOAc as the solvent, affording product **7r** in 63% yield as a white solid (m.p. 195-196 °C). <sup>1</sup>H NMR (400 MHz, CDCl<sub>3</sub>) δ 7.72 (dd, *J* = 8.0, 2.0 Hz, 1H), 7.56-7.52 (m, 2H), 7.32 (d, *J* = 2.0 Hz, 1H), 7.20 (d, *J* = 2.8 Hz, 1H), 7.07-7.03 (m, 2H), 6.82 (d, *J* = 8.4 Hz, 1H), 5.77 (dd, *J* = 8.0, 2.8 Hz, 1H), 3.57 (d, *J* = 8.0 Hz, 1H), 3.17 (s, 3H); <sup>13</sup>C NMR (100 MHz, CDCl<sub>3</sub>) δ 188.68, 171.60, 159.63,

146.83, 143.33, 137.12, 133.27, 128.99, 126.90, 126.36, 123.72, 122.47, 121.46, 118.48, 116.16, 112.26, 110.70, 80.72, 65.58, 54.89, 27.03; HRMS (ESI): Exact mass calcd for  $C_{21}H_{13}BrN_2NaO_3$   $[M+Na]^+$ : 443.0002, Found: 442.9995.

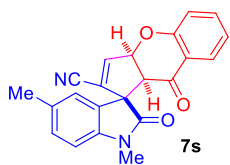

The reaction was run at 35 °C for 4 h by using  $CH_2Cl_2$  as the solvent, affording product **7s** in 88% yield as a white solid (m.p. 180-181 °C).  $^1H$  NMR (400 MHz,  $CDCl_3$ )  $\delta$  7.72 (dd,  $J = 8.0, 1.6$  Hz, 1H), 7.55-7.50 (m, 1H), 7.20 (d,  $J = 9.2$  Hz, 1H), 7.17 (d,  $J = 2.8$  Hz, 1H), 7.05-7.02 (m, 2H), 7.01 (s, 1H), 6.81 (d,  $J = 8.0$  Hz, 1H), 5.76 (dd,  $J = 8.0, 2.8$  Hz, 1H), 3.57 (d,  $J = 7.6$  Hz, 1H), 3.16 (s, 3H), 2.36 (s, 3H);  $^{13}C$  NMR (100 MHz,  $CDCl_3$ )  $\delta$  188.92, 171.95, 159.64, 146.19, 141.84, 136.91, 133.29, 130.70, 126.95, 126.85, 124.62, 123.74,

122.28, 121.49, 118.42, 112.58, 108.97, 80.91, 65.87, 54.82, 26.91, 21.16; HRMS (ESI): Exact mass calcd for  $C_{22}H_{16}N_2NaO_3$   $[M+Na]^+$ : 379.1053, Found: 379.1055.

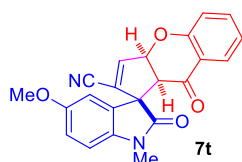

The reaction was run at 35 °C for 4 h by using  $CH_2Cl_2$  as the solvent, affording product **7t** in 91% yield as a white solid (m.p. 105-107 °C).  $^1H$  NMR (400 MHz,  $CDCl_3$ )  $\delta$  7.72 (dd,  $J = 8.0, 1.6$  Hz, 1H), 7.54-7.50 (m, 1H), 7.17 (d,  $J = 2.8$  Hz, 1H), 7.05-7.02 (m, 2H), 6.92 (dd,  $J = 8.8, 2.4$  Hz, 1H), 6.83 (d,  $J = 8.4$  Hz, 1H), 6.79 (d,  $J = 2.4$  Hz, 1H), 5.76 (dd,  $J = 7.6, 2.8$  Hz, 1H), 3.80 (s, 3H), 3.56 (d,  $J = 8.0$  Hz, 1H), 3.15 (s, 3H);  $^{13}C$  NMR (100 MHz,  $CDCl_3$ )  $\delta$  188.82, 171.65, 159.62, 156.70, 146.35, 137.58, 136.93, 128.18, 126.85,

124.40, 122.30, 121.45, 118.42, 114.31, 112.49, 110.58, 109.66, 80.87, 66.12, 55.77, 54.86, 26.97; HRMS (ESI): Exact mass calcd for  $C_{22}H_{16}N_2NaO_4$   $[M+Na]^+$ : 395.1002, Found: 395.1005.

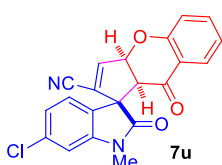

The reaction was run at 35 °C for 8 h by using EtOAc as the solvent, affording product **7u** in 72% yield as a white solid (m.p. 160-162 °C).  $^1H$  NMR (400 MHz,  $CDCl_3$ )  $\delta$  7.72 (dd,  $J = 8.0, 1.6$  Hz, 1H), 7.56-7.51 (m, 1H), 7.19 (d,  $J = 2.8$  Hz, 1H), 7.17-7.11 (m, 2H), 7.07-7.03 (m, 2H), 6.94 (d,  $J = 1.6$  Hz, 1H), 5.77 (dd,  $J = 7.6, 2.8$  Hz, 1H), 3.55 (d,  $J = 8.0$  Hz, 1H), 3.17 (s, 3H);  $^{13}C$  NMR (100 MHz,  $CDCl_3$ )  $\delta$  188.72, 172.07, 159.63, 146.68, 145.40, 137.11, 136.33, 126.89, 125.36, 123.94, 123.90, 123.59, 122.44, 121.44, 118.46, 112.30, 110.11,

80.72, 65.32, 54.86, 27.04; HRMS (ESI): Exact mass calcd for  $C_{21}H_{13}ClN_2NaO_3$   $[M+Na]^+$ : 399.0507, Found: 399.0513.

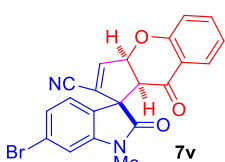

The reaction was run at 35 °C for 8 h by using EtOAc as the solvent, affording product **7v** in 65% yield as a white solid (m.p. 205-206 °C).  $^1H$  NMR (400 MHz,  $CDCl_3$ )  $\delta$  7.71 (d,  $J = 8.0$  Hz, 1H), 7.53 (t,  $J = 8.0$  Hz, 1H), 7.31 (d,  $J = 8.0$  Hz, 1H), 7.18 (s, 1H), 7.09 (s, 1H), 7.04 (t,  $J = 8.0$  Hz, 3H), 5.75 (d,  $J = 7.6$  Hz, 1H), 3.54 (d,  $J = 8.0$  Hz, 1H), 3.16 (s, 3H);  $^{13}C$  NMR (100 MHz,  $CDCl_3$ )  $\delta$  188.69, 171.94, 159.62, 146.72, 145.47, 137.10, 126.88, 126.52, 125.93, 124.24, 124.16, 123.77, 122.43, 121.44, 118.45, 112.86, 112.29, 80.72, 65.37,

54.82, 27.02; HRMS (ESI): Exact mass calcd for  $C_{21}H_{13}BrN_2NaO_3$   $[M+Na]^+$ : 443.0002, Found: 443.0007.

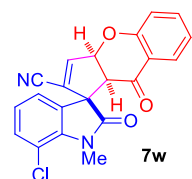

The reaction was run at 35 °C for 8 h by using EtOAc as the solvent, affording product **7w** in 73% yield as a white solid (m.p. 185-186 °C).  $^1H$  NMR (400 MHz,  $CDCl_3$ )  $\delta$  7.73 (d,  $J = 7.6$  Hz, 1H), 7.56-7.52 (m, 1H), 7.36-7.32 (m, 1H), 7.19 (d,  $J = 2.8$  Hz, 1H), 7.08-7.03 (m, 4H), 5.77 (dd,  $J = 8.0, 2.8$  Hz, 1H), 3.55 (d,  $J = 8.0$  Hz, 1H), 3.53 (s, 3H);  $^{13}C$  NMR (100 MHz,  $CDCl_3$ )  $\delta$  188.68, 172.38, 159.63, 146.69, 140.24, 137.11, 132.73, 129.75, 126.90, 124.33, 123.97, 122.46, 121.57, 121.47, 118.46, 116.63, 112.27, 80.74, 65.38, 55.31, 30.35; HRMS

(ESI): Exact mass calcd for  $C_{21}H_{13}ClN_2NaO_3$   $[M+Na]^+$ : 399.0507, Found: 399.0516.

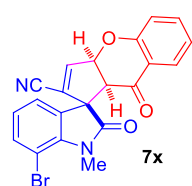

The reaction was run at 35 °C for 12 h by using EtOAc as the solvent, affording product **7x** in 62% yield as a white solid (m.p. 190-191 °C).  $^1H$  NMR (400 MHz,  $CDCl_3$ )  $\delta$  7.73 (dd,  $J = 8.0, 1.6$  Hz, 1H), 7.55-7.50 (m, 2H), 7.18 (d,  $J = 2.8$  Hz, 1H), 7.11-6.99 (m, 4H), 5.76 (dd,  $J = 7.6, 2.8$  Hz, 1H), 3.56 (d,  $J = 4.8$  Hz, 1H), 3.54 (s, 3H);  $^{13}C$  NMR (100 MHz,  $CDCl_3$ )  $\delta$  188.65, 172.58, 159.61, 146.71, 141.65, 137.08, 136.04, 130.04, 126.88, 124.67, 123.94, 122.45, 122.13, 121.46, 118.45, 112.26, 103.45, 80.72, 65.33, 55.34, 30.56; HRMS (ESI): Exact mass calcd for  $C_{21}H_{13}BrN_2NaO_3$   $[M+Na]^+$ : 443.0002, Found: 443.0007.

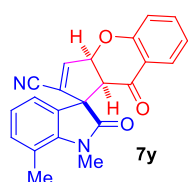

The reaction was run at 35 °C for 12 h by using EtOAc as the solvent, affording product **7y** in 89% yield as a white solid (m.p. 198-200 °C). <sup>1</sup>H NMR (400 MHz, CDCl<sub>3</sub>) δ 7.73 (dd, *J* = 8.0, 1.6 Hz, 1H), 7.55-7.49 (m, 1H), 7.16 -7.10 (m, 2H), 7.06-6.99 (m, 4H), 5.76 (dd, *J* = 8.0, 2.8 Hz, 1H), 3.55 (d, *J* = 8.0 Hz, 1H), 3.44 (s, 3H), 2.60 (s, 3H); <sup>13</sup>C NMR (100 MHz, CDCl<sub>3</sub>) δ 188.96, 172.76, 159.63, 146.11, 141.95, 136.88, 134.10, 127.65, 126.83, 124.69, 123.54, 122.28, 121.54, 120.86, 120.84, 118.41, 112.55, 80.93, 65.38, 55.25, 30.24, 18.93;

HRMS (ESI): Exact mass calcd for C<sub>22</sub>H<sub>16</sub>N<sub>2</sub>NaO<sub>3</sub> [M+Na]<sup>+</sup>: 379.1053, Found: 379.1056.

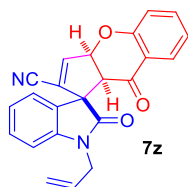

The reaction was run at 35 °C for 4 h by using CH<sub>2</sub>Cl<sub>2</sub> as the solvent, affording product **7z** in 85% yield as a white solid (m.p. 176-178 °C). <sup>1</sup>H NMR (400 MHz, CDCl<sub>3</sub>) δ 7.73 (dd, *J* = 8.0, 2.0 Hz, 1H), 7.54-7.50 (m, 1H), 7.37 (td, *J* = 7.6, 1.6 Hz, 1H), 7.21-7.14 (m, 3H), 7.05-7.01 (m, 2H), 6.90 (d, *J* = 8.0 Hz, 1H), 5.81-5.72 (m, 2H), 5.29-5.20 (m, 2H), 4.35-4.22 (m, 2H), 3.61 (d, *J* = 7.6 Hz, 1H); <sup>13</sup>C NMR (100 MHz, CDCl<sub>3</sub>) δ 188.70, 171.87, 159.62, 146.28, 143.37, 136.93, 130.24, 130.24, 127.01, 126.84, 124.46, 123.64, 123.00, 122.29, 121.51, 118.38, 117.67, 112.49, 110.20, 80.92, 65.78, 54.81, 42.77; HRMS (ESI): Exact mass calcd for C<sub>23</sub>H<sub>16</sub>N<sub>2</sub>NaO<sub>3</sub>

[M+Na]<sup>+</sup>: 391.1053, Found: 391.1054.

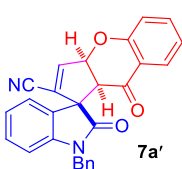

The reaction was run at 35 °C for 4 h by using CH<sub>2</sub>Cl<sub>2</sub> as the solvent, affording product **7a'** in 86% yield as a white solid (m.p. 184-186 °C). <sup>1</sup>H NMR (400 MHz, CDCl<sub>3</sub>) δ 7.75 (d, *J* = 8.8 Hz, 1H), 7.53-7.49 (m, 1H), 7.33-7.28 (m, 2H), 7.26-7.22 (m, 4H), 7.19-7.15 (m, 2H), 7.12-7.08 (m, 1H), 7.05-7.01 (m, 2H), 6.71 (d, *J* = 8.0 Hz, 1H), 5.76 (dd, *J* = 8.0, 2.8 Hz, 1H), 4.90-4.82 (m, 2H), 3.63 (d, *J* = 8.0 Hz, 1H); <sup>13</sup>C NMR (100 MHz, CDCl<sub>3</sub>) δ 188.68, 172.28, 159.62, 146.36, 143.24, 136.97, 134.64, 130.24, 128.75, 127.63, 127.01, 126.99, 126.83,

124.46, 123.01, 122.28, 121.47, 118.38, 110.38, 112.52, 80.93, 65.85, 54.77, 44.38; HRMS (ESI): Exact mass calcd for C<sub>27</sub>H<sub>18</sub>N<sub>2</sub>NaO<sub>3</sub> [M+Na]<sup>+</sup>: 441.1210, Found: 441.1207.

### 3. Optimization of the reaction conditions for the preparation of product **8a**<sup>a-b</sup>

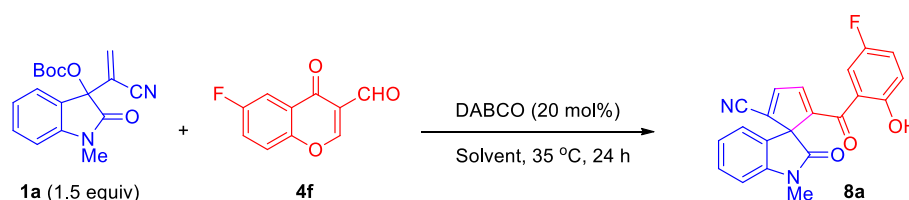

| Entry <sup>a</sup> | Solvent                              | Yield <sup>b</sup> (%) |
|--------------------|--------------------------------------|------------------------|
| 1                  | CH <sub>2</sub> Cl <sub>2</sub>      | 40                     |
| 2                  | ClCH <sub>2</sub> CH <sub>2</sub> Cl | 28                     |
| 3                  | Toluene                              | 21                     |
| 4                  | EtOAc                                | 35                     |
| 5                  | CH <sub>3</sub> CN                   | 28                     |
| 6                  | THF                                  | 72                     |
| 7                  | Dioxane                              | 47                     |

<sup>[a]</sup>Reaction conditions: **1a** (0.15 mmol), **4f** (0.10 mmol) and DABCO (20 mol%) in solvent (1.0 mL) were stirred at 35 °C under N<sub>2</sub> atmosphere. <sup>[b]</sup> Isolated yields after purification by column chromatography.

#### 4. General procedure and spectral data of products 8.

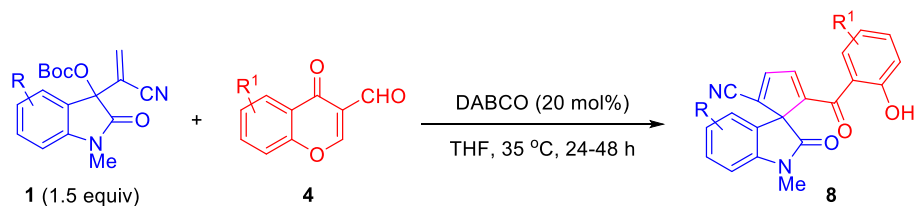

**General Procedure:** To a 10.0 mL Schlenk tube were successively added MBH carbonates **1** (0.15 mmol), 3-formylchromones **4** (0.1 mmol) and anhydrous THF (1.0 mL). The reaction mixture was stirred vigorously at room temperature to ensure full dissolution of 3-formylchromones **4**. Then, 1,4-diaza bicyclo[2.2.2]octane (DABCO, 0.02 mmol) was added in one portion. The reaction mixture was stirred at 35 °C under N<sub>2</sub> atmosphere for 24-48 h, and monitored by TLC. After completion, the reaction mixture was directly subjected to flash chromatography on silica gel using petroleum ether/EtOAc (from 10:1-1:1) as the eluent to afford the spirocyclopentadiene 2-oxindoles **8** incorporating a 2-hydroxybenzoyl moiety.

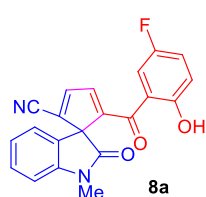

The reaction was run at 35 °C for 24 h by using THF as the solvent, affording product **8a** in 72% yield as a yellow solid (m.p. 190-191 °C). <sup>1</sup>H NMR (400 MHz, CDCl<sub>3</sub>) δ 10.84 (s, 1H), 7.50 (d, *J* = 2.4 Hz, 1H), 7.42-7.38 (m, 3H), 7.25-7.21 (m, 1H), 7.04-7.00 (m, 2H), 6.95 (dd, *J* = 9.2, 4.8 Hz, 1H), 6.89 (d, *J* = 7.6 Hz, 1H), 3.42 (s, 3H); <sup>13</sup>C NMR (100 MHz, CDCl<sub>3</sub>) δ 190.26 (d, *J* = 2.5 Hz), 168.28, 158.61 (d, *J* = 1.5 Hz), 155.99, 153.60, 149.36, 146.46, 145.29, 143.11, 130.55, 125.35, 124.24 (d, *J* = 23.4 Hz), 123.25 (d, *J* = 26.0 Hz), 120.29, 120.15 (d, *J* = 26.0 Hz), 118.74 (d, *J* = 6.3 Hz), 115.66 (d, *J* = 23.8 Hz), 112.82, 109.78, 71.11, 27.81; HRMS (ESI): Exact mass calcd for C<sub>21</sub>H<sub>13</sub>FN<sub>2</sub>NaO<sub>3</sub> [M+Na]<sup>+</sup>: 383.0802, Found: 383.0795.

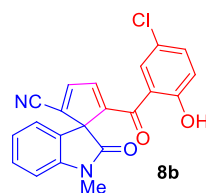

The reaction was run at 35 °C for 48 h by using THF as the solvent, affording product **8b** in 67% yield as a yellow solid (m.p. 192-193 °C); <sup>1</sup>H NMR (400 MHz, CDCl<sub>3</sub>) δ 10.99 (s, 1H), 7.66 (d, *J* = 2.8 Hz, 1H), 7.51 (d, *J* = 3.2 Hz, 1H), 7.45-7.38 (m, 3H), 7.05-7.01 (m, 2H), 6.94 (d, *J* = 8.8 Hz, 1H), 6.90 (dd, *J* = 7.6, 1.0 Hz, 1H), 3.42 (s, 3H). <sup>13</sup>C NMR (100 MHz, CDCl<sub>3</sub>) δ 190.17, 168.25, 160.88, 149.24, 146.47, 145.28, 143.44, 136.49, 130.55, 129.66, 125.47, 123.84, 123.39, 123.18, 120.40, 120.27, 119.92, 112.81, 109.77, 71.11, 27.82; HRMS (ESI): Exact mass calcd for C<sub>21</sub>H<sub>13</sub>ClN<sub>2</sub>NaO<sub>3</sub> [M+Na]<sup>+</sup>: 399.0507, Found: 399.0509.

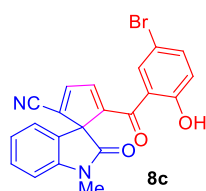

The reaction was run at 35 °C for 24 h by using THF as the solvent, affording product **8c** in 66% yield as a yellow solid (m.p. 195-196 °C). <sup>1</sup>H NMR (400 MHz, CDCl<sub>3</sub>) δ 11.01 (s, 1H), 7.80 (d, *J* = 2.4 Hz, 1H), 7.56 (dd, *J* = 8.8, 2.4 Hz, 1H), 7.52 (d, *J* = 2.8 Hz, 1H), 7.42-7.38 (m, 2H), 7.05-7.01 (m, 2H), 6.92-6.87 (m, 2H), 3.42 (s, 3H); <sup>13</sup>C NMR (100 MHz, CDCl<sub>3</sub>) δ 190.06, 168.25, 161.31, 149.23, 146.48, 145.27, 143.52, 139.26, 132.64, 130.56, 125.50, 123.40, 123.20, 120.78, 120.58, 120.27, 112.80, 110.70, 109.77, 71.11, 27.83; HRMS (ESI): Exact mass calcd for C<sub>21</sub>H<sub>13</sub>BrN<sub>2</sub>NaO<sub>3</sub> [M+Na]<sup>+</sup>: 443.0002, Found: 443.0003.

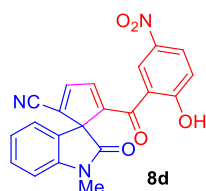

The reaction was run at 35 °C for 24 h by using THF as the solvent, affording product **8d** in 88% yield as a yellow solid (m.p. 215-217 °C). <sup>1</sup>H NMR (400 MHz, CDCl<sub>3</sub>) δ 11.74 (s, 1H), 8.71 (d, *J* = 2.8 Hz, 1H), 8.36 (dd, *J* = 9.2, 2.8 Hz, 1H), 7.55-7.54 (m, 2H), 7.42 (t, *J* = 7.6 Hz, 1H), 7.09 (d, *J* = 9.2 Hz, 1H), 7.06-7.02 (m, 2H), 6.94 (d, *J* = 7.6 Hz, 1H), 3.43 (s, 3H); <sup>13</sup>C NMR (100 MHz, CDCl<sub>3</sub>) δ 189.99, 168.07, 167.07, 148.52, 146.39, 145.23, 144.73, 139.66, 131.13, 130.71, 126.86, 126.33, 123.53, 123.30, 120.05, 119.84, 118.07, 112.60, 109.87, 71.22, 27.87; HRMS (ESI): Exact mass calcd for C<sub>21</sub>H<sub>13</sub>N<sub>3</sub>NaO<sub>5</sub> [M+Na]<sup>+</sup>: 410.0747, Found: 410.0745.

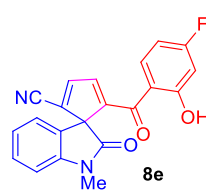

The reaction was run at 35 °C for 24 h by using THF as the solvent, affording product **8e** in 75% yield as a yellow solid (m.p. 172-174 °C). <sup>1</sup>H NMR (400 MHz, CDCl<sub>3</sub>) δ 11.51 (s, 1H), 7.77-7.73 (m, 1H), 7.49 (d, *J* = 2.4 Hz, 1H), 7.39 (td, *J* = 7.6, 0.8 Hz, 1H), 7.34 (d, *J* = 2.4 Hz, 1H), 7.03-6.99 (m, 2H), 6.87 (d, *J* = 7.6 Hz, 1H), 6.66-6.61 (m, 2H), 3.42 (s, 3H); <sup>13</sup>C NMR (100 MHz, CDCl<sub>3</sub>) δ 190.20, 167.66 (d, *J* = 64.2 Hz), 168.31, 165.14 (d, *J* = 14.4 Hz), 149.65, 146.47, 145.29, 142.44, 133.15 (d, *J* = 11.8 Hz), 130.51, 124.97, 123.21 (d, *J* = 23.8 Hz), 120.31, 116.46, 112.88, 109.75, 107.45 (d, *J* = 22.8 Hz), 105.43 (d, *J* = 23.7 Hz), 71.12, 27.80; HRMS



(ESI): Exact mass calcd for  $C_{21}H_{13}FN_2NaO_3$   $[M+Na]^+$ : 383.0802, Found: 383.0804.

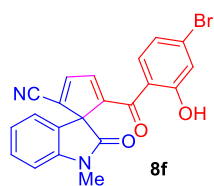

The reaction was run at 35 °C for 48 h by using THF as the solvent, affording product **8f** in 70% yield as a yellow solid (m.p. 188-189 °C).  $^1H$  NMR (400 MHz,  $CDCl_3$ )  $\delta$  11.23 (s, 1H), 7.58 (d,  $J$  = 8.4 Hz, 1H), 7.49 (d,  $J$  = 2.4 Hz, 1H), 7.40 (td,  $J$  = 7.6, 1.2 Hz, 1H), 7.36 (d,  $J$  = 2.8 Hz, 1H), 7.17 (d,  $J$  = 1.6 Hz, 1H), 7.06 (dd,  $J$  = 8.4, 2.0 Hz, 1H), 7.04-6.99 (m, 2H), 6.87 (dd,  $J$  = 8.0, 1.2 Hz, 1H), 3.42 (s, 3H);  $^{13}C$  NMR (100 MHz,  $CDCl_3$ )  $\delta$  190.68, 168.26, 162.87, 149.55, 146.43, 145.31, 142.79, 131.59, 131.45, 130.55, 125.24, 123.37, 123.10, 122.66, 121.97, 120.30, 118.28, 112.85, 109.79, 71.12, 27.82; HRMS (ESI): Exact mass calcd for  $C_{21}H_{13}BrN_2NaO_3$   $[M+Na]^+$ : 443.0002, Found: 442.9991.

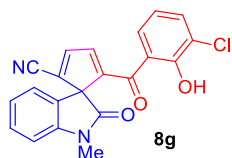

The reaction was run at 35 °C for 48 h by using THF as the solvent, affording product **8g** in 72% yield as a yellow solid (m.p. 180-182 °C).  $^1H$  NMR (400 MHz,  $CDCl_3$ )  $\delta$  11.56 (s, 1H), 7.66 (dd,  $J$  = 8.0, 1.6 Hz, 1H), 7.59 (dd,  $J$  = 8.0, 1.6 Hz, 1H), 7.49 (d,  $J$  = 2.4 Hz, 1H), 7.42-7.37 (m, 2H), 7.04-6.99 (m, 2H), 6.91-6.86 (m, 2H), 3.43 (s, 3H);  $^{13}C$  NMR (100 MHz,  $CDCl_3$ )  $\delta$  191.01, 168.17, 157.98, 149.37, 146.38, 145.29, 143.33, 136.61, 130.56, 129.23, 125.36, 123.35, 123.30, 123.06, 120.39, 120.22, 119.17, 112.82, 109.81, 71.14,

27.84; HRMS (ESI): Exact mass calcd for  $C_{21}H_{13}ClN_2NaO_3$   $[M+Na]^+$ : 399.0507, Found: 399.0503.

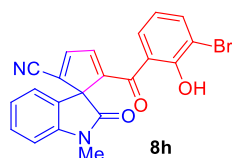

The reaction was run at 35 °C for 48 h by using THF as the solvent, affording product **8h** in 75% yield as a yellow solid (m.p. 187-188 °C).  $^1H$  NMR (400 MHz,  $CDCl_3$ )  $\delta$  11.67 (s, 1H), 7.76 (dd,  $J$  = 8.0, 1.6 Hz, 1H), 7.70 (dd,  $J$  = 8.0, 1.6 Hz, 1H), 7.49 (d,  $J$  = 2.4 Hz, 1H), 7.42-7.37 (m, 2H), 7.03-6.99 (m, 2H), 6.87-6.82 (m, 2H), 3.42 (s, 3H);  $^{13}C$  NMR (100 MHz,  $CDCl_3$ )  $\delta$  190.95, 168.17, 158.83, 149.31, 146.38, 145.30, 143.27, 139.81, 130.57, 130.00, 125.36, 123.36, 123.07, 120.30, 120.22, 119.78, 112.83, 112.47, 109.82, 71.17,

27.84. HRMS (ESI): Exact mass calcd for  $C_{21}H_{13}BrN_2NaO_3$   $[M+Na]^+$ : 443.0002, Found: 443.0002.

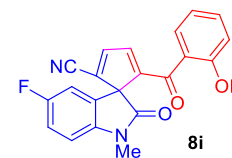

The reaction was run at 35 °C for 24 h by using THF as the solvent, affording product **8i** in 70% yield as a yellow solid (m.p. 175-176 °C).  $^1H$  NMR (400 MHz,  $CDCl_3$ )  $\delta$  11.08 (s, 1H), 7.72 (d,  $J$  = 8.0 Hz, 1H), 7.53-7.49 (m, 2H), 7.39 (d,  $J$  = 2.4 Hz, 1H), 7.10 (td,  $J$  = 8.8, 2.4 Hz, 1H), 7.00-6.91 (m, 3H), 6.65 (dd,  $J$  = 7.2, 2.4 Hz, 1H), 3.41 (s, 3H);  $^{13}C$  NMR (100 MHz,  $CDCl_3$ )  $\delta$  191.03, 168.12, 162.51, 159.14 (d,  $J$  = 241.7 Hz), 149.52, 146.87, 142.95, 141.39 (d,  $J$  = 2.2 Hz), 136.88, 130.69, 124.45, 122.08 (d,  $J$  = 8.6 Hz), 119.33,

119.17, 118.81, 116.86 (d,  $J$  = 23.3 Hz), 112.74, 111.35 (d,  $J$  = 241.7 Hz), 110.27 (d,  $J$  = 8.1 Hz), 70.96, 27.98; HRMS (ESI): Exact mass calcd for  $C_{21}H_{13}FN_2NaO_3$   $[M+Na]^+$ : 383.0802, Found: 383.0804.

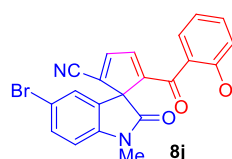

The reaction was run at 35 °C for 48 h by using THF as the solvent, affording product **8j** in 65% yield as a yellow solid (m.p. 192-194 °C).  $^1H$  NMR (400 MHz,  $CDCl_3$ )  $\delta$  11.07 (s, 1H), 7.73 (d,  $J$  = 8.0 Hz, 1H), 7.55-7.48 (m, 3H), 7.40 (d,  $J$  = 2.4 Hz, 1H), 7.02-6.87 (m, 4H), 3.41 (s, 3H);  $^{13}C$  NMR (100 MHz,  $CDCl_3$ )  $\delta$  190.88, 167.98, 162.52, 149.56, 146.92, 144.41, 143.09, 136.89, 133.32, 130.69, 126.22, 124.43, 122.66, 119.31, 119.19, 118.82, 115.66, 112.73, 111.07, 70.57, 27.92; HRMS (ESI): Exact mass calcd for  $C_{21}H_{13}BrN_2NaO_3$   $[M+Na]^+$ : 443.0002, Found: 442.9996.

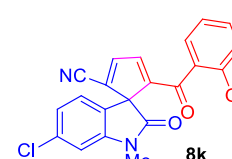

The reaction was run at 35 °C for 48 h by using THF as the solvent, affording product **8k** in 67% yield as a yellow solid (m.p. 174-175 °C).  $^1H$  NMR (400 MHz,  $CDCl_3$ )  $\delta$  11.08 (s, 1H), 7.70 (dd,  $J$  = 8.0, 1.6 Hz, 1H), 7.52-7.48 (m, 2H), 7.38 (d,  $J$  = 2.4 Hz, 1H), 7.02 (d,  $J$  = 2.0 Hz, 1H), 7.00-6.97 (m, 2H), 6.94-6.90 (m, 1H), 6.80 (d,  $J$  = 7.6 Hz, 1H), 3.41 (s, 3H);  $^{13}C$  NMR (100 MHz,  $CDCl_3$ )  $\delta$  191.08, 168.43, 162.52, 149.64, 146.84, 146.48, 142.82, 136.88, 136.36, 130.65, 124.46, 124.00, 123.23, 119.30, 119.13, 118.83, 118.82,

112.77, 110.54, 70.43, 27.91; HRMS (ESI): Exact mass calcd for  $C_{21}H_{13}ClN_2NaO_3$   $[M+Na]^+$ : 399.0507, Found: 399.0506.

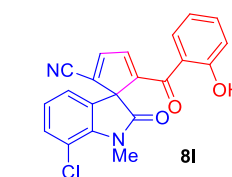

The reaction was run at 35 °C for 48h by using THF as the solvent, affording product **8l** in 74% yield as a yellow solid (m.p. 195-196 °C).  $^1H$  NMR (400 MHz,  $CDCl_3$ )  $\delta$  11.09 (s, 1H), 7.70 (d,  $J$  = 8.0 Hz, 1H), 7.52-

7.48 (m, 2H), 7.38-7.36 (m, 1H), 7.31 (dd,  $J = 8.4, 1.2$  Hz, 1H), 6.98 (dd,  $J = 8.4, 1.0$  Hz, 1H), 6.94-6.89 (m, 2H), 6.74 (dd,  $J = 7.6, 1.0$  Hz, 1H), 3.77 (s, 3H);  $^{13}\text{C}$  NMR (100 MHz,  $\text{CDCl}_3$ )  $\delta$  190.98, 168.73, 162.53, 149.85, 146.86, 141.34, 136.86, 132.89, 130.63, 124.70, 123.91, 123.01, 121.50, 119.33, 119.12, 118.84, 116.86, 112.74, 70.49, 31.28; HRMS (ESI): Exact mass calcd for  $\text{C}_{21}\text{H}_{13}\text{ClN}_2\text{NaO}_3$   $[\text{M}+\text{Na}]^+$ : 399.0507, Found: 399.0504.

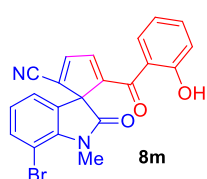

The reaction was run at 35 °C for 48 h by using THF as the solvent, affording product **8m** in 67% yield as a yellow solid (m.p. 170-171 °C).  $^1\text{H}$  NMR (400 MHz,  $\text{CDCl}_3$ )  $\delta$  11.09 (s, 1H), 7.70 (d,  $J = 8.0$  Hz, 1H), 7.53-7.48 (m, 3H), 7.37 (d,  $J = 2.4$  Hz, 1H), 6.99 (d,  $J = 8.4$  Hz, 1H), 6.92 (t,  $J = 7.6$  Hz, 1H), 6.84 (t,  $J = 7.6$  Hz, 1H), 6.78 (d,  $J = 7.2$  Hz, 1H), 3.78 (s, 3H);  $^{13}\text{C}$  NMR (100 MHz,  $\text{CDCl}_3$ )  $\delta$  190.96, 168.95, 162.53, 149.89, 146.87, 142.71, 136.86, 136.22, 130.63, 124.74, 124.27, 123.22, 122.02, 119.33, 119.12, 118.84, 112.73, 103.62, 70.47, 31.55; HRMS (ESI): Exact mass calcd for  $\text{C}_{21}\text{H}_{13}\text{BrN}_2\text{NaO}_3$   $[\text{M}+\text{Na}]^+$ : 443.0002, Found: 442.9995.

## 5. Optimization of the reaction conditions for the preparation of product **9a**<sup>a,b</sup>

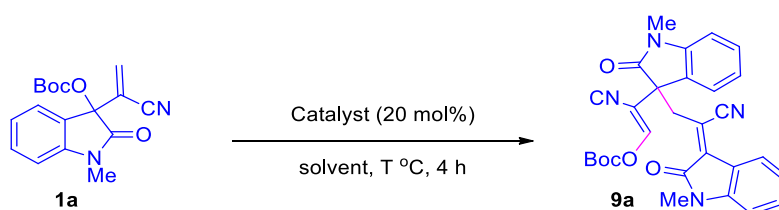

| Entry <sup>a</sup> | Catalyst              | Solvent                             | T/°C | Yield <sup>b</sup> (%) |
|--------------------|-----------------------|-------------------------------------|------|------------------------|
| 1                  | DABCO                 | $\text{CH}_2\text{Cl}_2$            | 35   | 55                     |
| 2                  | DABCO                 | $\text{ClCH}_2\text{CH}_2\text{Cl}$ | 35   | 45                     |
| 3                  | DABCO                 | Toluene                             | 35   | 33                     |
| 4                  | DABCO                 | EtOAc                               | 35   | 40                     |
| 5                  | DABCO                 | THF                                 | 35   | 40                     |
| 6                  | DABCO                 | Dioxane                             | 35   | 35                     |
| 7                  | DABCO                 | $\text{CH}_3\text{CN}$              | 35   | 37                     |
| 8                  | DABCO                 | $\text{CH}_2\text{Cl}_2$            | 0    | 66                     |
| 9                  | DABCO                 | $\text{CH}_2\text{Cl}_2$            | -10  | 48                     |
| 10                 | DBU                   | $\text{CH}_2\text{Cl}_2$            | 0    | mess                   |
| 11                 | TBD                   | $\text{CH}_2\text{Cl}_2$            | 0    | 16                     |
| 12                 | DMAP                  | $\text{CH}_2\text{Cl}_2$            | 0    | 25                     |
| 13                 | $\text{Et}_3\text{N}$ | $\text{CH}_2\text{Cl}_2$            | 0    | 34                     |

<sup>[a]</sup>Reaction conditions: **1a** (0.15 mmol) and catalyst (20 mol%) in solvent (1.0 mL) were stirred at the indicated temperature under  $\text{N}_2$  atmosphere. <sup>[b]</sup> Isolated yields after purification by column chromatography.

## 6. General procedure and spectral data of products **9**

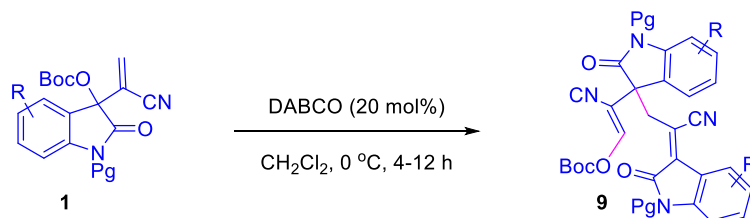

**General Procedure:** To a solution of MBH carbonates **1** (0.15 mmol) in anhydrous  $\text{CH}_2\text{Cl}_2$  (1.0 mL) at 0 °C was added DABCO (20 mol%) under  $\text{N}_2$  atmosphere. Then, the reaction mixture was kept at this temperature for 4-12 h under stirring, and monitored by TLC. After completion, the reaction mixture was directly subjected to flash chromatography on silica gel using petroleum ether/EtOAc (from 4:1-1:1) as the eluent to afford the bisoxindoles **9**.

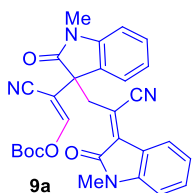

The reaction was run at 0 °C for 4 h by using CH<sub>2</sub>Cl<sub>2</sub> as the solvent, affording product **9a** in 66% yield as a yellow solid (m.p. 125-126 °C). <sup>1</sup>H NMR (500 MHz, CDCl<sub>3</sub>) δ 8.03 (d, *J* = 8.0 Hz, 1H), 7.77 (s, 1H), 7.48 (d, *J* = 7.5 Hz, 1H), 7.35 (td, *J* = 7.5, 1.0 Hz, 1H), 7.31 (td, *J* = 7.5, 1.0 Hz, 1H), 7.06-6.99 (m, 2H), 6.89 (d, *J* = 7.5 Hz, 1H), 6.75 (d, *J* = 7.5 Hz, 1H), 4.82 (d, *J* = 13.5 Hz, 1H), 3.48 (d, *J* = 13.5 Hz, 1H), 3.27 (s, 3H), 3.17 (s, 3H), 1.50 (s, 9H); <sup>13</sup>C NMR (125 MHz, CDCl<sub>3</sub>) δ 173.50, 165.52, 150.76, 148.82, 144.03, 143.09, 138.87, 132.73, 129.93, 126.82, 124.83, 124.37, 123.18, 122.90, 119.51, 116.62, 113.28, 112.11, 109.01, 108.33,

98.00, 85.86, 50.78, 33.82, 27.47, 26.79, 25.97; HRMS (ESI): Exact mass calcd for C<sub>29</sub>H<sub>26</sub>N<sub>4</sub>NaO<sub>5</sub> [M+Na]<sup>+</sup>: 533.1795, Found: 533.1800.

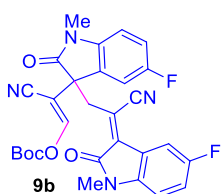

The reaction was run at 0 °C for 12 h by using CH<sub>2</sub>Cl<sub>2</sub> as the solvent, affording product **9b** in 53% yield as a yellow solid (m.p. 112-113 °C). <sup>1</sup>H NMR (500 MHz, CDCl<sub>3</sub>) δ 7.81 (s, 1H), 7.79 (dd, *J* = 8.5, 2.5 Hz, 1H), 7.29 (dd, *J* = 8.0, 2.5 Hz, 1H), 7.09 (td, *J* = 8.5, 2.5 Hz, 1H), 7.03 (td, *J* = 9.0, 2.5 Hz, 1H), 6.84 (dd, *J* = 8.5, 4.0 Hz, 1H), 6.71 (dd, *J* = 8.5, 4.0 Hz, 1H), 4.86 (d, *J* = 14.0 Hz, 1H), 3.41 (d, *J* = 14.0 Hz, 1H), 3.26 (s, 3H), 3.18 (s, 3H), 1.51 (s, 9H); <sup>13</sup>C NMR (125 MHz, CDCl<sub>3</sub>) δ 173.05, 165.28, 160.02 (d, *J* = 35 Hz), 158.10 (d, *J* = 33 Hz), 151.04, 148.72, 140.24, 139.04, 138.61 (d, *J* = 2.9 Hz), 128.37 (d, *J* = 8.4 Hz), 120.20 (d, *J* = 8.9 Hz), 119.30

(d, *J* = 23.8 Hz), 116.50 (d, *J* = 23.4 Hz), 116.09, 113.15 (d, *J* = 9.5 Hz), 113.04, 112.91, 112.16 (d, *J* = 26.6 Hz), 109.71 (d, *J* = 7.9 Hz), 109.05 (d, *J* = 7.9 Hz), 97.25, 86.11, 51.07, 33.78, 27.46, 26.97, 26.13; HRMS (ESI): Exact mass calcd for C<sub>29</sub>H<sub>24</sub>F<sub>2</sub>N<sub>4</sub>NaO<sub>5</sub> [M+Na]<sup>+</sup>: 569.1607, Found: 569.1614.

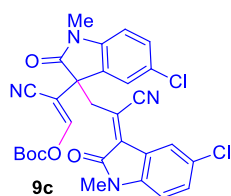

The reaction was run at 0 °C for 12 h by using CH<sub>2</sub>Cl<sub>2</sub> as the solvent, affording product **9c** in 61% yield as a brown solid (m.p. 142-143 °C). <sup>1</sup>H NMR (400 MHz, CDCl<sub>3</sub>) δ 8.00 (s, 1H), 7.79 (d, *J* = 1.0 Hz, 1H), 7.48 (s, 1H), 7.34 (d, *J* = 8.4 Hz, 1H), 7.29 (d, *J* = 9.2 Hz, 1H), 6.82 (d, *J* = 8.8 Hz, 1H), 6.71 (d, *J* = 8.4 Hz, 1H), 4.81 (d, *J* = 13.6 Hz, 1H), 3.40 (d, *J* = 13.6 Hz, 1H), 3.25 (s, 3H), 3.17 (s, 3H), 1.51 (s, 9H); <sup>13</sup>C NMR (100 MHz, CDCl<sub>3</sub>) δ 172.85, 165.12, 151.06, 148.68, 142.50, 141.53, 138.28, 132.64, 130.01, 129.46, 128.65, 128.56, 128.46, 125.25, 124.44, 120.47, 116.16, 113.00, 110.02, 109.45, 96.99, 86.16, 51.03, 33.91, 27.45, 26.95,

26.10; HRMS (ESI): Exact mass calcd for C<sub>29</sub>H<sub>24</sub>Cl<sub>2</sub>N<sub>4</sub>NaO<sub>5</sub> [M+Na]<sup>+</sup>: 601.1016, Found: 601.1023.

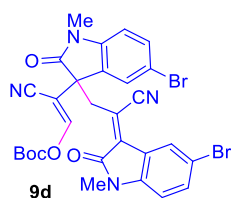

The reaction was run at 0 °C for 12 h by using CH<sub>2</sub>Cl<sub>2</sub> as the solvent, affording product **9d** in 63% yield as a yellow solid (m.p. 148-150 °C). <sup>1</sup>H NMR (500 MHz, CDCl<sub>3</sub>) δ 8.13 (d, *J* = 2.0 Hz, 1H), 7.79 (s, 1H), 7.60 (d, *J* = 1.5 Hz, 1H), 7.49 (dd, *J* = 8.0, 1.5 Hz, 1H), 7.43 (dd, *J* = 8.5, 2.0 Hz, 1H), 6.78 (d, *J* = 8.5 Hz, 1H), 6.67 (d, *J* = 8.5 Hz, 1H), 4.81 (d, *J* = 13.5 Hz, 1H), 3.40 (d, *J* = 14.0 Hz, 1H), 3.25 (s, 3H), 3.18 (s, 3H), 1.52 (s, 9H); <sup>13</sup>C NMR (125 MHz, CDCl<sub>3</sub>) δ 172.79, 165.02, 151.07, 148.71, 142.98, 142.07, 138.16, 135.55, 132.91, 128.81, 128.07, 127.15, 120.91, 116.16, 115.68, 113.03, 110.48, 109.89, 97.06, 86.17, 51.12, 34.00, 27.48,

26.93, 26.11; HRMS (ESI): Exact mass calcd for C<sub>29</sub>H<sub>24</sub>Br<sub>2</sub>N<sub>4</sub>NaO<sub>5</sub> [M+Na]<sup>+</sup>: 689.0006, Found: 689.0010.

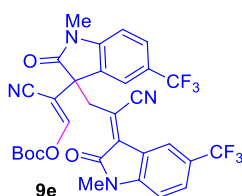

The reaction was run at 0 °C for 12 h by using CH<sub>2</sub>Cl<sub>2</sub> as the solvent, affording product **9e** in 52% yield as a yellow solid (m.p. 160-161 °C). <sup>1</sup>H NMR (400 MHz, CDCl<sub>3</sub>) δ 8.24 (s, 1H), 7.82 (s, 1H), 7.74 (s, 1H), 7.64 (d, *J* = 8.0 Hz, 1H), 7.59 (d, *J* = 9.2 Hz, 1H), 6.98 (d, *J* = 8.4 Hz, 1H), 6.86 (d, *J* = 8.4 Hz, 1H), 4.92 (d, *J* = 13.6 Hz, 1H), 3.42 (d, *J* = 13.6 Hz, 1H), 3.31 (s, 3H), 3.20 (s, 3H), 1.52 (s, 9H); <sup>13</sup>C NMR (100 MHz, CDCl<sub>3</sub>) δ 173.34, 165.34, 151.16, 148.63, 146.41 (q, *J* = 1.3 Hz), 145.92 (q, *J* = 1.5 Hz), 137.90, 130.26 (q, *J* = 4.0 Hz), 129.46, 127.71 (q, *J* = 4.0 Hz), 127.39, 125.67, 125.34 (q, *J* = 12 Hz), 125.13, 122.19 (q, *J* =

3.8 Hz), 121.26 (q, *J* = 3.8 Hz), 119.27, 116.03, 113.46, 112.88, 108.97, 108.50, 96.73, 86.31, 51.01, 33.99, 27.44, 27.09, 26.11; HRMS (ESI): Exact mass calcd for C<sub>31</sub>H<sub>24</sub>F<sub>6</sub>N<sub>4</sub>NaO<sub>5</sub> [M+Na]<sup>+</sup>: 669.1543, Found: 669.1547.

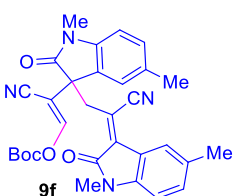

The reaction was run at 0 °C for 12 h by using CH<sub>2</sub>Cl<sub>2</sub> as the solvent, affording product **9f** in 75% yield as a yellow solid (m.p. 145-146 °C). <sup>1</sup>H NMR (500 MHz, CDCl<sub>3</sub>) δ 7.84 (s, 1H), 7.77 (s, 1H), 7.29 (s, 1H), 7.15 (d, *J* = 8.0 Hz, 1H), 7.09 (d, *J* = 8.0 Hz, 1H), 6.77 (d, *J* = 8.0 Hz, 1H), 6.64 (d, *J* = 8.0 Hz, 1H), 4.76 (d, *J* = 14.0 Hz, 1H), 3.47 (d, *J* = 14.0 Hz, 1H), 3.24 (s, 3H), 3.14 (s, 3H), 2.29 (s, 3H), 2.26 (s, 3H), 1.51 (s, 9H); <sup>13</sup>C NMR (125 MHz, CDCl<sub>3</sub>) δ 173.38, 165.58, 150.69, 148.85, 141.86, 140.70, 139.13, 133.11, 132.75,

132.51, 130.16, 127.00, 125.56, 124.95, 119.57, 116.72, 113.34, 111.74, 108.67, 108.03, 98.13, 85.80, 50.95, 33.84, 29.67, 27.48, 26.78, 25.89, 21.06; HRMS (ESI): Exact mass calcd for  $C_{31}H_{30}N_4NaO_5$   $[M+Na]^+$ : 561.2108, Found: 561.2108.

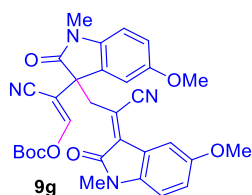

The reaction was run at 0 °C for 12 h by using  $CH_2Cl_2$  as the solvent, affording product **9g** in 60% yield as a brown solid (m.p. 128-129 °C).  $^1H$  NMR (500 MHz,  $CDCl_3$ )  $\delta$  7.79 (s, 1H), 7.65 (d,  $J = 2.5$  Hz, 1H), 7.11 (d,  $J = 2.5$  Hz, 1H), 6.90 (dd,  $J = 9.0, 3.0$  Hz, 1H), 6.83 (dd,  $J = 8.5, 2.5$  Hz, 1H), 6.79 (d,  $J = 3.5$  Hz, 1H), 6.66 (d,  $J = 8.5$  Hz, 1H), 4.89 (d,  $J = 13.5$  Hz, 1H), 3.75 (s, 3H), 3.71 (s, 3H), 3.40 (d,  $J = 14.0$  Hz, 1H), 3.24 (s, 3H), 3.13 (s, 3H), 1.51 (s, 9H);  $^{13}C$  NMR (125 MHz,  $CDCl_3$ )  $\delta$  173.21, 165.46, 156.15, 155.93, 150.77, 148.81, 139.23, 137.87, 136.42, 127.81, 120.10, 118.53, 116.50, 115.53, 113.22, 112.34, 111.19, 110.29, 109.58, 108.88, 98.05, 85.85, 55.86, 55.78, 51.30, 33.67, 27.46, 26.86, 25.94; HRMS (ESI): Exact mass calcd for  $C_{31}H_{30}N_4NaO_7$   $[M+Na]^+$ : 593.2007, Found: 593.1997.

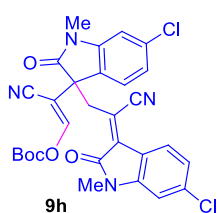

The reaction was run at 0 °C for 12 h by using  $CH_2Cl_2$  as the solvent, affording product **9h** in 63% yield as a brown solid (m.p. 142-143 °C).  $^1H$  NMR (400 MHz,  $CDCl_3$ )  $\delta$  7.96 (d,  $J = 8.4$  Hz, 1H), 7.77 (s, 1H), 7.41 (d,  $J = 8.0$  Hz, 1H), 7.04-6.99 (m, 2H), 6.90 (d,  $J = 1.6$  Hz, 1H), 6.78 (d,  $J = 1.6$  Hz, 1H), 4.78 (d,  $J = 14.4$  Hz, 1H), 3.41 (d,  $J = 12.0$  Hz, 1H), 3.25 (s, 3H), 3.16 (s, 3H), 1.51 (s, 9H);  $^{13}C$  NMR (100 MHz,  $CDCl_3$ )  $\delta$  173.35, 165.44, 150.96, 148.71, 145.08, 144.20, 139.01, 138.01, 135.99, 125.71, 125.36, 125.14, 123.15, 122.96, 117.74, 116.51, 113.12, 112.01, 109.87, 109.27, 97.27, 86.12, 50.41, 33.86, 27.44, 26.92, 26.14; HRMS (ESI): Exact mass calcd for  $C_{29}H_{24}Cl_2N_4NaO_5$   $[M+Na]^+$ : 601.1016, Found: 601.1031.

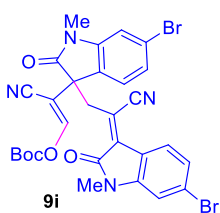

The reaction was run at 0 °C for 12 h by using  $CH_2Cl_2$  as the solvent, affording product **9i** in 64% yield as a yellow solid (m.p. 115-116 °C).  $^1H$  NMR (500 MHz,  $CDCl_3$ )  $\delta$  7.89 (d,  $J = 8.0$  Hz, 1H), 7.77 (s, 1H), 7.35 (d,  $J = 8.0$  Hz, 1H), 7.19-7.16 (m, 2H), 7.05 (d,  $J = 2.0$  Hz, 1H), 6.94 (d,  $J = 1.5$  Hz, 1H), 4.77 (d,  $J = 14.0$  Hz, 1H), 3.39 (d,  $J = 14.0$  Hz, 1H), 3.24 (s, 3H), 3.16 (s, 3H), 1.51 (s, 9H);  $^{13}C$  NMR (125 MHz,  $CDCl_3$ )  $\delta$  173.26, 165.34, 151.00, 148.74, 145.05, 144.33, 138.15, 127.30, 126.09, 126.05, 125.97, 125.76, 125.49, 123.90, 118.23, 116.54, 113.09, 112.65, 112.24, 112.11, 97.26, 86.14, 50.45, 33.92, 27.47, 26.93, 26.14; HRMS (ESI): Exact mass calcd for  $C_{29}H_{24}Br_2N_4NaO_5$   $[M+Na]^+$ : 689.0006, Found: 689.0018.

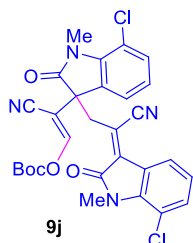

The reaction was run at 0 °C for 12 h by using  $CH_2Cl_2$  as the solvent, affording product **9j** in 50% yield as a yellow solid (m.p. 138-140 °C).  $^1H$  NMR (400 MHz,  $CDCl_3$ )  $\delta$  8.06 (d,  $J = 8.8$  Hz, 1H), 7.74 (s, 1H), 7.42 (d,  $J = 7.6$  Hz, 1H), 7.29 (d,  $J = 8.8$  Hz, 2H), 7.01-6.93 (m, 2H), 4.76 (d,  $J = 16.8$  Hz, 1H), 3.63 (s, 3H), 3.55 (s, 3H), 3.45 (d,  $J = 13.6$  Hz, 1H), 1.51 (s, 9H);  $^{13}C$  NMR (100 MHz,  $CDCl_3$ )  $\delta$  173.51, 165.83, 151.21, 148.70, 139.80, 138.96, 137.76, 134.93, 132.29, 129.77, 123.99, 123.67, 123.13, 122.93, 122.01, 116.54, 116.49, 116.01, 113.17, 112.72, 97.33, 86.11, 50.31, 34.36, 30.27, 29.43, 27.45; HRMS (ESI): Exact mass calcd for  $C_{29}H_{24}Cl_2N_4NaO_5$   $[M+Na]^+$ : 601.1016, Found: 601.1027.

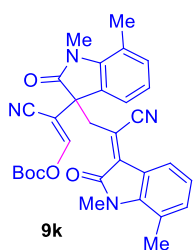

The reaction was run at 0 °C for 12 h by using  $CH_2Cl_2$  as the solvent, affording product **9k** in 52% yield as a brown solid (m.p. 145-146 °C).  $^1H$  NMR (400 MHz,  $CDCl_3$ )  $\delta$  7.95 (d,  $J = 8.0$  Hz, 1H), 7.71 (s, 1H), 7.30 (d,  $J = 7.2$  Hz, 1H), 7.08 (d,  $J = 7.6$  Hz, 1H), 7.02 (d,  $J = 8.0$  Hz, 1H), 6.91 (t,  $J = 7.6$  Hz, 1H), 6.88 (t,  $J = 8.0$  Hz, 1H), 4.87 (d,  $J = 14.0$  Hz, 1H), 3.53 (s, 3H), 3.45 (s, 3H), 3.44 (d,  $J = 14.0$  Hz, 1H), 2.56 (s, 3H), 2.51 (s, 3H), 1.50 (s, 9H);  $^{13}C$  NMR (100 MHz,  $CDCl_3$ )  $\delta$  174.33, 166.36, 150.66, 148.85, 141.85, 140.92, 138.43, 136.58, 133.59, 127.41, 123.06, 122.72, 122.65, 122.31, 120.63, 120.22, 119.91, 116.82, 113.31, 111.66, 98.52, 85.78, 50.23, 33.96, 30.19, 29.36, 27.45, 19.09, 19.06; HRMS (ESI): Exact mass calcd for  $C_{31}H_{30}N_4NaO_5$   $[M+Na]^+$ : 561.2108, Found: 561.2120.

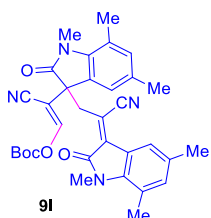

The reaction was run at 0 °C for 12 h by using  $CH_2Cl_2$  as the solvent, affording product **9l** in 61% yield as a pale yellow solid (m.p. 137-138 °C).  $^1H$  NMR (500 MHz,  $CDCl_3$ )  $\delta$  7.77 (s, 1H), 7.71 (s, 1H), 7.11 (s, 1H), 6.89 (s,

1H), 6.82 (s, 1H), 4.79 (d,  $J = 14.0$  Hz, 1H), 3.50 (s, 3H), 3.43 (d,  $J = 12.0$  Hz, 1H), 3.42 (s, 3H), 2.50 (s, 3H), 2.47 (s, 3H), 2.23 (s, 3H), 2.20 (s, 3H), 1.50 (s, 9H);  $^{13}\text{C}$  NMR (125 MHz,  $\text{CDCl}_3$ )  $\delta$  174.18, 166.41, 150.58, 148.87, 139.61, 138.72, 138.44, 137.14, 134.04, 132.50, 132.21, 127.68, 123.27, 122.78, 120.38, 120.20, 119.54, 116.91, 113.38, 111.28, 98.64, 85.71, 50.42, 33.98, 30.11, 29.22, 27.47, 20.75, 18.89; HRMS (ESI): Exact mass calcd for  $\text{C}_{33}\text{H}_{34}\text{N}_4\text{NaO}_5$   $[\text{M}+\text{Na}]^+$ : 589.2421, Found: 589.2433.

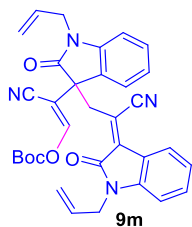

The reaction was run at 0 °C for 12 h by using  $\text{CH}_2\text{Cl}_2$  as the solvent, affording product **9m** in 64% yield as a brown solid (m.p. 115-116 °C).  $^1\text{H}$  NMR (400 MHz,  $\text{CDCl}_3$ )  $\delta$  8.08 (d,  $J = 7.6$  Hz, 1H), 7.78 (s, 1H), 7.51 (d,  $J = 8.0$  Hz, 1H), 7.32 (td,  $J = 8.0, 1.2$  Hz, 1H), 7.27 (td,  $J = 7.6, 1.2$  Hz, 1H), 7.03 (td,  $J = 7.6, 1.0$  Hz, 1H), 7.03 (td,  $J = 7.6, 1.0$  Hz, 1H), 7.02 (td,  $J = 7.6, 1.0$  Hz, 1H), 6.90 (d,  $J = 8.0$  Hz, 1H), 6.74 (d,  $J = 7.6$  Hz, 1H), 5.93-5.73 (m, 2H), 5.30-5.13 (m, 4H), 4.43-4.21 (m, 4H), 3.57 (d,  $J = 13.6$  Hz, 1H), 1.51 (s, 9H);  $^{13}\text{C}$  NMR (100 MHz,  $\text{CDCl}_3$ )  $\delta$  172.98, 165.26, 150.76, 148.77, 143.26, 142.24, 138.92, 132.70, 130.99, 130.50, 129.80, 126.93, 124.87, 124.50, 123.10, 122.88, 119.56, 118.25, 117.63, 116.83, 113.30, 111.95, 109.94, 109.12, 97.94, 85.87, 50.87, 43.08, 41.92, 33.80, 27.45; HRMS (ESI): Exact mass calcd for  $\text{C}_{33}\text{H}_{30}\text{N}_4\text{NaO}_5$   $[\text{M}+\text{Na}]^+$ : 585.2108, Found: 585.2112.

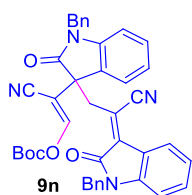

The reaction was run at 0 °C for 12 h by using  $\text{CH}_2\text{Cl}_2$  as the solvent, affording product **9n** in 47% yield as a brown solid (m.p. 123-124 °C).  $^1\text{H}$  NMR (400 MHz,  $\text{CDCl}_3$ )  $\delta$  8.10 (d,  $J = 8.0$  Hz, 1H), 7.85 (s, 1H), 7.55 (d,  $J = 7.6$  Hz, 1H), 7.34-7.18 (m, 12H), 7.01 (t,  $J = 8.0$  Hz, 2H), 6.76 (d,  $J = 7.6$  Hz, 1H), 6.65 (d,  $J = 8.0$  Hz, 1H), 5.11 (d,  $J = 16.4$  Hz, 1H), 4.94 (d,  $J = 16.0$  Hz, 1H), 4.81-4.67 (m, 3H), 3.75 (d,  $J = 14.4$  Hz, 1H), 1.51 (s, 9H);  $^{13}\text{C}$  NMR (100 MHz,  $\text{CDCl}_3$ )  $\delta$  173.45, 165.66, 150.87, 148.76, 143.25, 142.22, 139.04, 135.04, 135.00, 132.75, 129.84, 128.86, 128.83, 127.84, 127.70, 127.25, 127.09, 127.03, 124.91, 124.61, 123.22, 122.98, 119.65, 112.06, 110.10, 109.29, 97.92, 85.90, 50.94, 44.47, 43.42, 33.84, 27.47; HRMS (ESI): Exact mass calcd for  $\text{C}_{41}\text{H}_{34}\text{N}_4\text{NaO}_5$   $[\text{M}+\text{Na}]^+$ : 685.2421, Found: 685.2424.

## 7. Control experiments

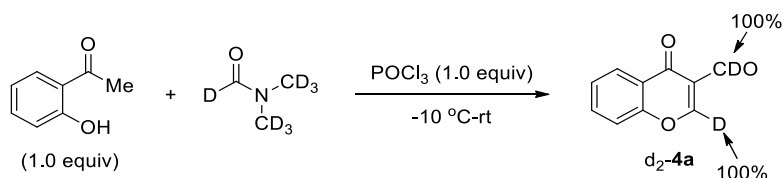

**The preparation of d<sub>2</sub>-4a:** To a solution of 2-hydroxyacetophenone (136 mg, 1 mmol) in deuterated dimethylformamide (0.6 mL) was added phosphorus oxychloride (0.5 mL, 5 mmol) dropwise at -10°C. The reaction mixture was then stirred at rt for 24 h before the reaction was quenched by addition of H<sub>2</sub>O (5 mL). The resulting solid was collected and dried in vacuo to afford deuterated 3-formylchromone d<sub>2</sub>-4a in 85% yield (150 mg, 0.85 mmol). The deuterated ratio of d<sub>2</sub>-4a was determined by <sup>1</sup>H NMR analysis using CDCl<sub>3</sub> as the NMR solvent.

<sup>1</sup>H NMR (400 MHz, CDCl<sub>3</sub>) δ 8.30 (dd, *J* = 8.0, 2.0 Hz, 1H), 7.78-7.73 (m, 1H), 7.55-7.49 (m, 2H);

<sup>13</sup>C NMR (100 MHz, CDCl<sub>3</sub>) δ 175.99, 156.15, 156.14, 134.80, 126.63, 126.16, 125.30, 118.60.

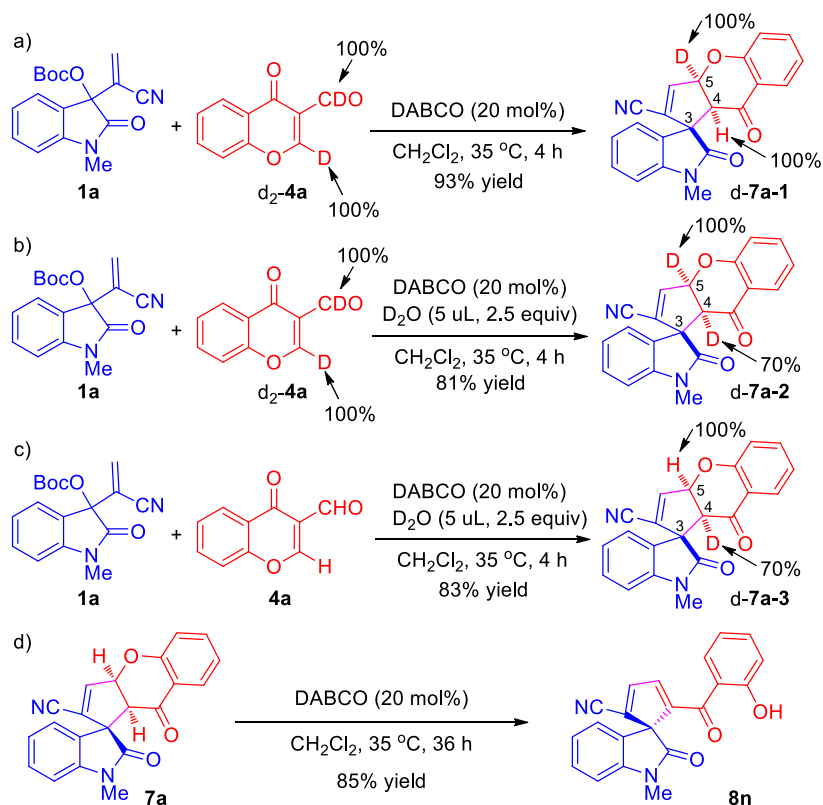

**The preparation of d-7a-1:** To a solution of MBH carbonate **1a** (0.15 mmol) and deuterated 3-formylchromone d<sub>2</sub>-4a (0.10 mmol) in anhydrous CH<sub>2</sub>Cl<sub>2</sub> (1.0 mL) was added DABCO (0.02 mmol) at rt. The reaction mixture was then stirred vigorously at 35 °C under N<sub>2</sub> atmosphere for 4 h. After completion of the reaction as indicated by TLC, the mixture was directly subjected to flash chromatography on silica gel using petroleum ether/EtOAc (4:1) as the eluent to afford the deuterated product d-7a-1 in 93% yield. The deuterated ratio of d-7a-1 was determined by <sup>1</sup>H NMR analysis using CDCl<sub>3</sub> as the NMR solvent.

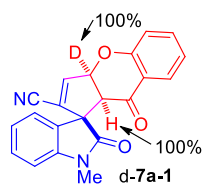

<sup>1</sup>H NMR (400 MHz, CDCl<sub>3</sub>) δ 7.72 (dd, *J* = 8.0, 1.6 Hz, 1H), 7.55-7.50 (m, 1H), 7.43-7.39 (m, 1H), 7.21-7.15 (m, 3H), 7.06-7.02 (m, 2H), 6.93 (d, *J* = 7.6 Hz, 1H), 3.59 (s, 1H), 3.18 (s, 3H); <sup>13</sup>C NMR (100 MHz, CDCl<sub>3</sub>) δ 188.86, 172.05, 159.65, 146.27, 144.25, 136.93, 130.37, 127.05, 126.86, 124.48, 123.67, 122.92, 122.31, 121.51, 118.43, 112.48, 109.24, 65.77, 54.76, 26.89; HRMS (ESI): Exact mass calcd for C<sub>21</sub>H<sub>13</sub>DN<sub>2</sub>NaO<sub>3</sub> [M+Na]<sup>+</sup>: 366.0959, Found: 366.0960.

**The preparation of d-7a-2:** To a solution of MBH carbonate **1a** (0.15 mmol), deuterated 3-formylchromone d<sub>2</sub>-4a (0.10 mmol) and D<sub>2</sub>O (5 uL, 0.25 mol) in anhydrous CH<sub>2</sub>Cl<sub>2</sub> (1.0 mL) was added DABCO (0.02 mmol) at rt. The reaction mixture was then stirred

vigorously at 35 °C under N<sub>2</sub> atmosphere for 4 h. After completion of the reaction as indicated by TLC, the mixture was directly subjected to flash chromatography on silica gel using petroleum ether/EtOAc (4:1) as the eluent to afford the deuterated product d-**7a-2** in 81% yield. The deuterated ratio of d-**7a-2** was determined by <sup>1</sup>H NMR analysis using CDCl<sub>3</sub> as the NMR solvent.

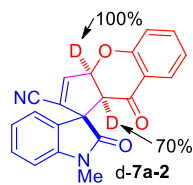

<sup>1</sup>H NMR (400 MHz, CDCl<sub>3</sub>) δ 7.72 (dd, *J* = 8.0, 1.6 Hz, 1H), 7.55-7.51 (m, 1H), 7.44-7.39 (m, 1H), 7.20-7.15 (m, 3H), 7.06-7.02 (m, 2H), 6.93 (d, *J* = 7.6 Hz, 1H), 3.59 (s, 0.3H), 3.18 (s, 3H); <sup>13</sup>C NMR (100 MHz, CDCl<sub>3</sub>) δ 188.83, 172.05, 159.68, 146.25, 144.28, 136.93, 130.38, 127.05, 126.86, 124.52, 123.67, 122.92, 122.30, 121.51, 118.44, 112.48, 109.24, 65.75, 54.80, 26.90; HRMS (ESI): Exact mass calcd for C<sub>21</sub>H<sub>12</sub>D<sub>2</sub>N<sub>2</sub>NaO<sub>3</sub> [M+Na]<sup>+</sup>: 367.1022, Found: 367.1013.

**The preparation of d-7a-3:** To a solution of MBH carbonate **1a** (0.15 mmol), 3-formylchromone **4a** (0.1 mmol) and D<sub>2</sub>O (5 μL, 0.25 mol) in anhydrous CH<sub>2</sub>Cl<sub>2</sub> (1.0 mL) was added DABCO (0.02 mmol) at rt. The reaction mixture was then stirred vigorously at 35 °C under N<sub>2</sub> atmosphere for 4 h. After completion of the reaction as indicated by TLC, the mixture was directly subjected to flash chromatography on silica gel using petroleum ether/EtOAc (4:1) as the eluent to afford the deuterated product d-**7a-3** in 83% yield. The deuterated ratio of d-**7a-3** was determined by <sup>1</sup>H NMR analysis using CDCl<sub>3</sub> as the NMR solvent.

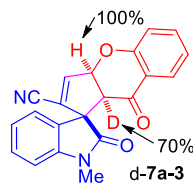

<sup>1</sup>H NMR (400 MHz, CDCl<sub>3</sub>) δ 7.73 (dd, *J* = 8.0, 1.6 Hz, 1H), 7.55-7.51 (m, 1H), 7.44-7.40 (m, 1H), 7.20-7.17 (m, 3H), 7.06-7.02 (m, 2H), 6.93 (d, *J* = 8.0 Hz, 1H), 5.79-5.77 (m, 1H), 3.59 (d, *J* = 7.6 Hz, 0.3H), 3.18 (s, 3H); <sup>13</sup>C NMR (100 MHz, CDCl<sub>3</sub>) δ 188.83, 172.04, 159.67, 146.31, 144.28, 136.93, 130.38, 127.05, 126.86, 124.48, 123.67, 122.92, 122.32, 121.52, 118.44, 112.48, 109.24, 80.75, 65.74, 54.90, 26.90; HRMS (ESI): Exact mass calcd for C<sub>21</sub>H<sub>13</sub>DN<sub>2</sub>NaO<sub>3</sub> [M+Na]<sup>+</sup>: 366.0959, Found: 366.0952.

**The preparation of 8n:** To a solution of compound **7a** (0.10 mmol, 34.2 mg, 88% ee) in anhydrous CH<sub>2</sub>Cl<sub>2</sub> (1.0 mL) was added DABCO (0.02 mmol) at rt. The reaction mixture was then stirred vigorously at 35 °C under N<sub>2</sub> atmosphere for 36 h. After the full consumption of **7a** as indicated by TLC, the mixture was directly subjected to flash chromatography on silica gel using petroleum ether/EtOAc (4:1) as the eluent to afford the title compound **8n** in 85% yield.

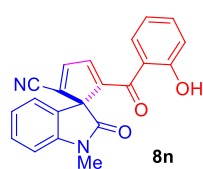

<sup>1</sup>H NMR (400 MHz, CDCl<sub>3</sub>) δ 11.12 (s, 1H), 7.73 (dd, *J* = 8.0, 1.6 Hz, 1H), 7.51-7.46 (m, 2H), 7.41-7.34 (m, 2H), 7.03-6.95 (m, 3H), 6.93-6.88 (m, 2H), 3.42 (s, 3H); <sup>13</sup>C NMR (100 MHz, CDCl<sub>3</sub>) δ 191.26, 168.40, 162.39, 149.78, 146.57, 145.29, 142.66, 136.65, 130.74, 130.39, 124.82, 123.23, 123.04, 120.45, 119.39, 119.02, 118.64, 112.94, 109.66, 71.02, 27.73; HRMS (ESI): Exact mass calcd for C<sub>21</sub>H<sub>14</sub>N<sub>2</sub>NaO<sub>3</sub> [M+Na]<sup>+</sup>: 365.0897, Found: 365.0891.

## 8. ESI-MS studies:

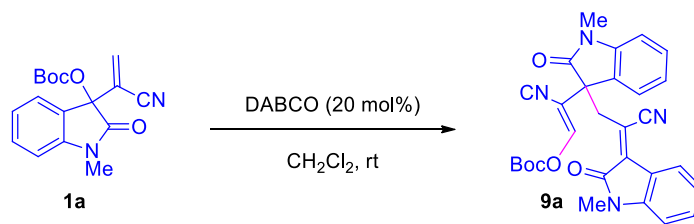

**General Procedure:** To a solution of MBH carbonate **1a** (0.10 mmol) in anhydrous  $\text{CH}_2\text{Cl}_2$  (1.0 mL) at room temperature was added DABCO (20 mol%) under  $\text{N}_2$  atmosphere. Then, the reaction mixture was stirred at rt for 15 min and the solution was studied by ESI-MS immediately.

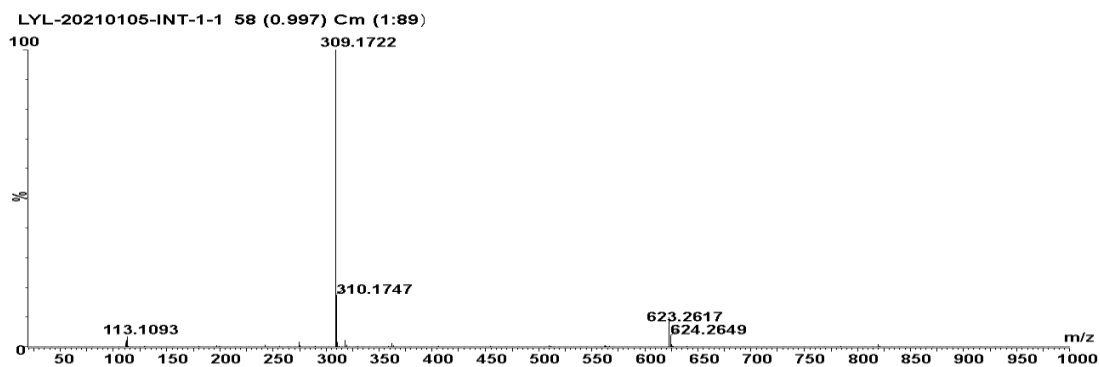

**Figure S1:** A full positive ESI-MS spectrum for the solution of DABCO and **1a** after reacting for 15 minutes.

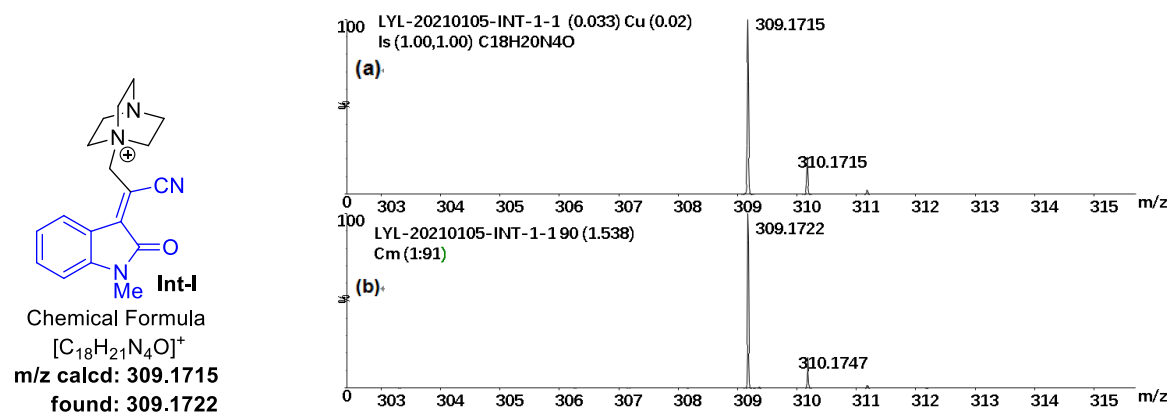

**Figure S2:** The simulated (a) and experimental (b) ESI-MS spectra of intermediate **Int-I**.

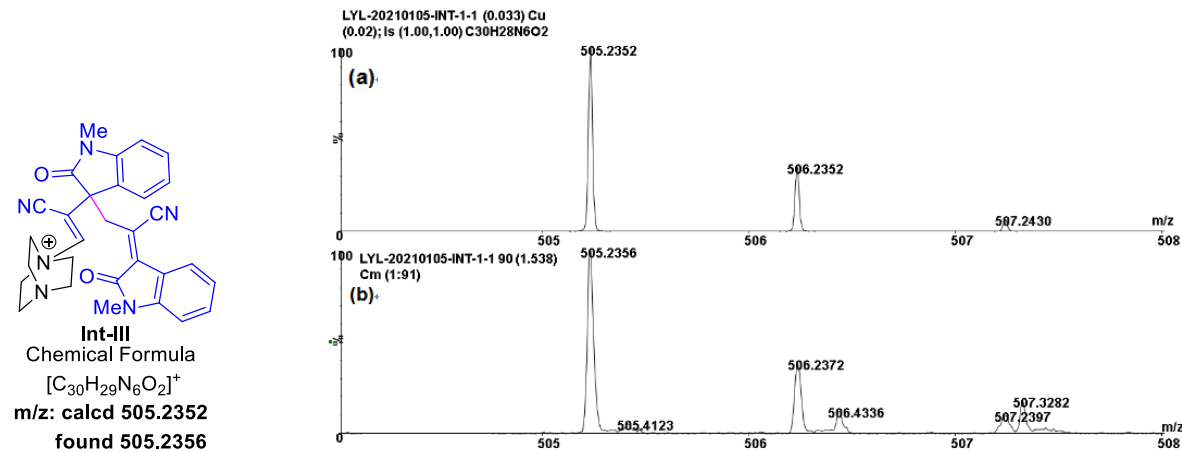

**Figure S3:** The simulated (a) and experimental (b) ESI-MS spectra of intermediate **Int-III**.



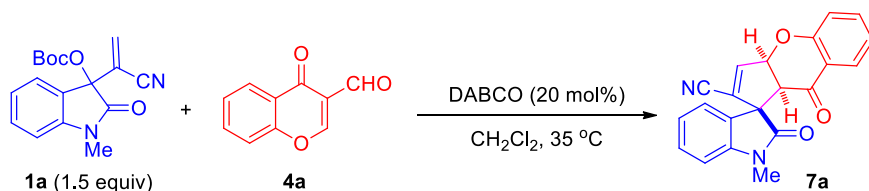

**General Procedure:** To a 10 mL Schlenk tube equipped with a magnetic stirrer bar were added MBH carbonate **1a** (0.15 mmol), 3-formylchromone **4a** (0.1 mmol) and anhydrous  $\text{CH}_2\text{Cl}_2$  (1 mL). The reaction mixture was stirred vigorously at room temperature to ensure full dissolution of 3-formylchromone **4a**. Then, DABCO (0.02 mmol) was added. The resulting mixture was stirred at  $35\text{ }^\circ\text{C}$  under  $\text{N}_2$  atmosphere for 15 min and the solution was studied by ESI-MS immediately.

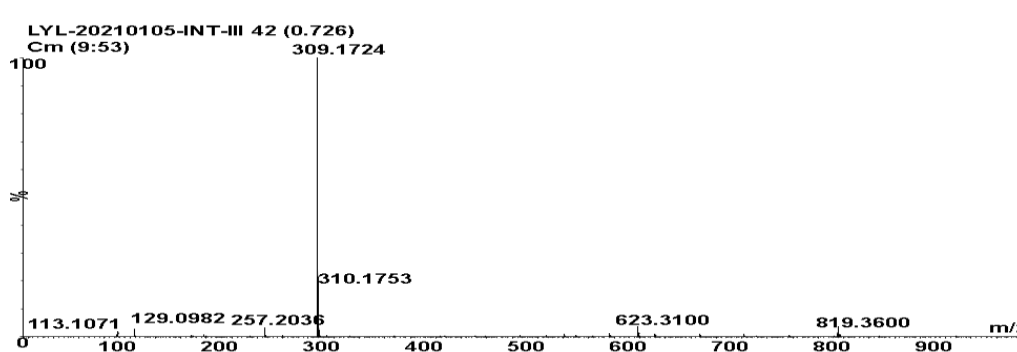

**Figure S4:** A full positive ESI-MS spectrum for the solution of **1a**, **4a** and DABCO after reacting for 15 minutes.

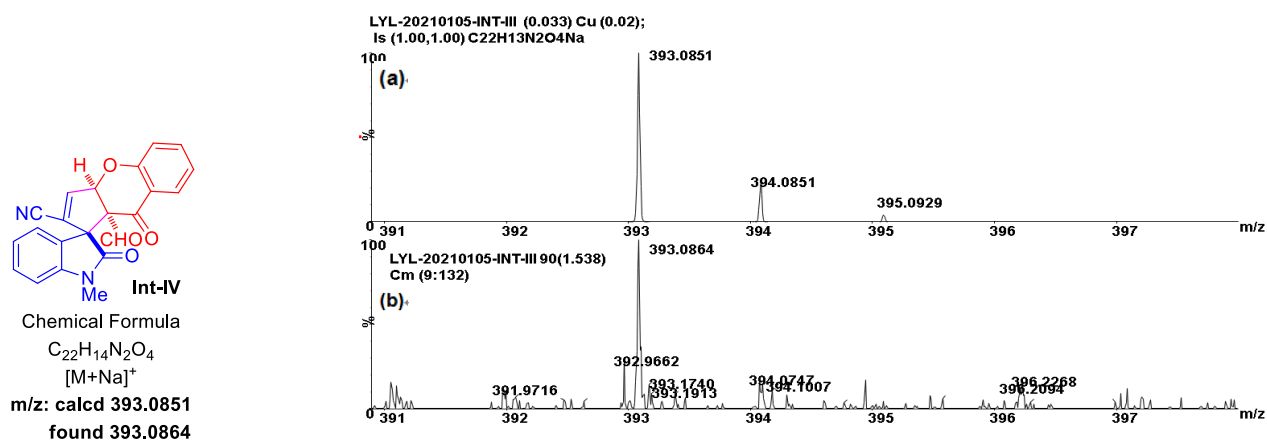

**Figure S5:** The simulated (a) and experimental (b) ESI-MS spectra of intermediate **Int-IV**.

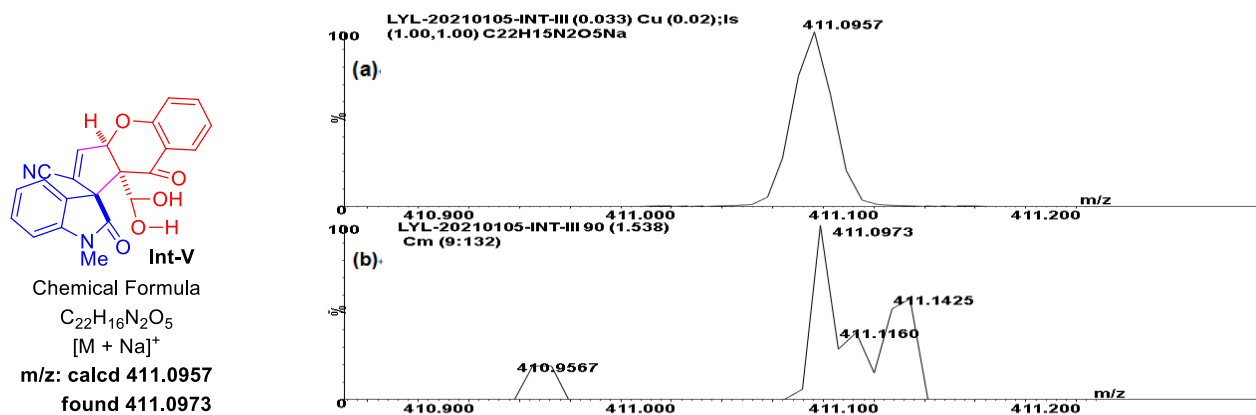

**Figure S6:** The simulated (a) and experimental (b) ESI-MS spectra of intermediate **Int-V**.

## 9. Theoretical calculations

To get more information about the origin of regioselectivity of this switchable catalytic approach, DFT calculations were then performed using Gaussian 16 suite. In the DABCO-catalyzed allylic alkylation reaction, the C-C bond formation involved in nucleophilic addition between  $\gamma$ - or  $\alpha$ -carbon of *N*-allylic ylide intermediate **Int-II** and  $\alpha$ -carbon of MBH carbonate **1a** via transition states TS1 and TS2 respectively, was studied. As shown in Figure S7, the calculated energy barrier of TS1 was 2.8 kcal/mol lower than that of TS2 as the  $\gamma$ -position of **Int-II** was sterically less hindered. In addition, the positively charged nitrogen on DABCO could stabilize the build up negative charge on nitrogen of the nitrile group in the transition state **TS1** (3.52 Å between the two nitrogen atoms), but there was no such stabilization effect available in **TS2**. As such, both steric and electronic effect render the  $\gamma$ -regioselective allylic alkylation more favorable, which was consistent with the experiment data.

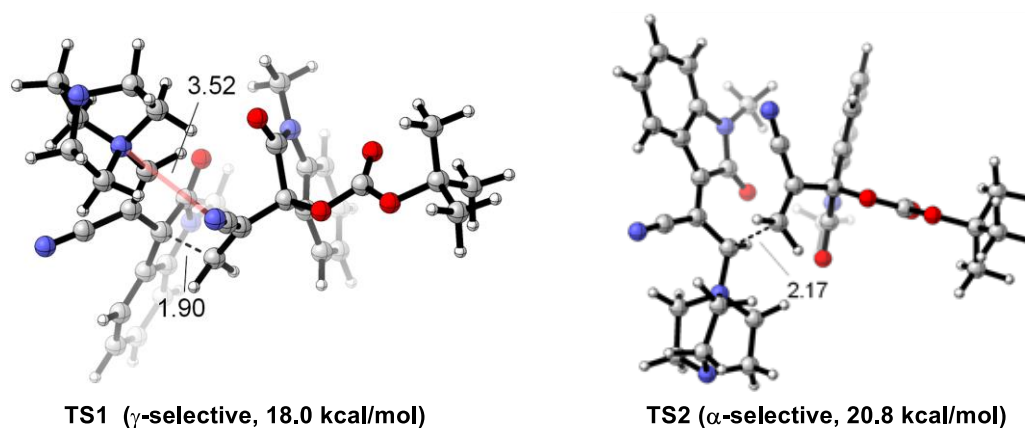

Figure S7. Optimized structures and energies of **TS1** and **TS2**.

In the DABCO-catalyzed [3+2] annulation reaction between **1a** and **4a**, DFT calculations supported the stepwise mechanism as no concerted transition state was identified. In the stepwise pathway, the reaction underwent through two C-C addition steps to form the five-membered ring, and the second C-C addition step would be crucial for controlling the actual selectivity. Both  $\gamma$ - and  $\alpha$ -regioselective annulation were considered. As shown in Figure S8, the  $\gamma$ -regioselective annulation transition state **TS4** having the formyl group and the bulky ammonium moiety located at the same side was higher in energy barrier than  $\alpha$ -regioselective annulation transition state **TS3** (**TS4**, 13.6 kcal/mol vs **TS3**, 11.2 kcal/mol) due to the unfavorable steric repulsion. Therefore, the regioselectivity trends observed in this case might be mainly dominated by steric effect in the second C-C addition step.

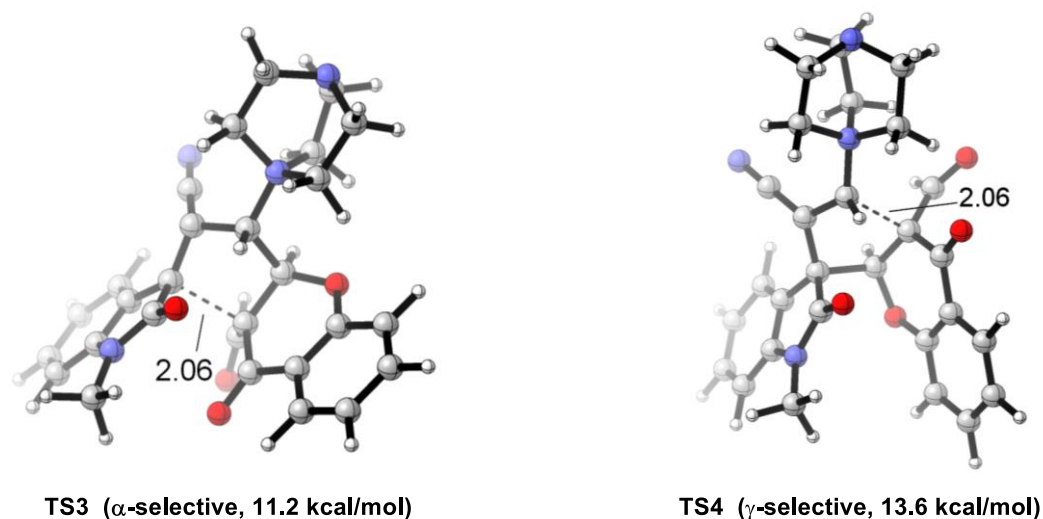

Figure S8. Optimized structures and energies of **TS3** and **TS4**.

Computational data:

TS1

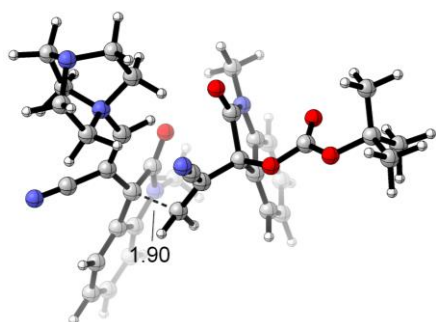

Zero-point correction= 0.697643 (Hartree/Particle)  
Thermal correction to Energy= 0.738939  
Thermal correction to Enthalpy= 0.739883  
Thermal correction to Gibbs Free Energy= 0.624676  
SCF Done: E(SOV) = -2061.01564050 A.U.

|   |             |             |             |
|---|-------------|-------------|-------------|
| C | -5.29887900 | 0.81154100  | -2.34817700 |
| C | -3.76613800 | 1.02783200  | -2.41057400 |
| N | -3.18793000 | 0.73218300  | -1.04493200 |
| C | 3.53769600  | -0.78848800 | -2.91210400 |
| C | 4.37833300  | 0.30685300  | -3.09048700 |
| C | 3.96909100  | 1.59430000  | -2.73197000 |
| C | 2.69421000  | 1.73776400  | -2.20897800 |
| C | 1.82279500  | 0.64619600  | -2.03403500 |
| C | 2.25893500  | -0.62887200 | -2.36720900 |
| N | 2.06271500  | 2.90580800  | -1.78263700 |
| C | 0.78117100  | 2.63811000  | -1.34725600 |
| C | 0.62016400  | 1.15506100  | -1.33901300 |
| O | -0.03525400 | 3.48196500  | -1.00068300 |
| C | 2.63154800  | 4.22912500  | -1.84645000 |
| C | -1.79189200 | 1.20154200  | -0.96233200 |
| C | -0.73052000 | 0.64782300  | -1.59286400 |
| C | -0.87113000 | -0.47334800 | -2.48220400 |
| H | -5.62796600 | 0.23890900  | -3.21966200 |
| H | -5.82405200 | 1.77111600  | -2.35943800 |
| H | -3.48502800 | 2.05447200  | -2.65386800 |
| H | -3.26811600 | 0.35036800  | -3.10830400 |
| H | 3.87797100  | -1.77966400 | -3.19269700 |
| H | 5.36893600  | 0.16274900  | -3.51007600 |
| H | 4.62551500  | 2.44948000  | -2.85832500 |
| H | 1.61835000  | -1.49333100 | -2.22158000 |
| H | 2.91649100  | 4.47535600  | -2.87518700 |
| H | 3.50834900  | 4.30232800  | -1.19470500 |
| H | 1.87035500  | 4.92782000  | -1.49674800 |
| H | -1.68309300 | 2.10752400  | -0.38331100 |
| C | -3.97868100 | 1.50789600  | -0.00469400 |
| H | -3.92173100 | 2.55733600  | -0.30412700 |
| H | -3.44524000 | 1.39664000  | 0.94140700  |
| C | -5.41844300 | 0.95285700  | 0.02496800  |
| H | -6.13820400 | 1.77603500  | 0.03250100  |
| H | -5.57792700 | 0.35938900  | 0.92944300  |
| N | -5.67798300 | 0.09718100  | -1.13367600 |
| C | -3.37582100 | -0.74412300 | -0.72957000 |

|   |             |             |             |
|---|-------------|-------------|-------------|
| H | -3.09224300 | -0.85464400 | 0.31979300  |
| H | -2.69349100 | -1.31582800 | -1.35372500 |
| C | -4.85343900 | -1.10399500 | -1.01556000 |
| H | -5.24081600 | -1.72610500 | -0.20434700 |
| H | -4.94291300 | -1.67201000 | -1.94659700 |
| N | -1.00820800 | -1.34980700 | -3.22818900 |
| C | 3.63830900  | 3.97915800  | 2.07436500  |
| C | 3.27596700  | 5.23777400  | 1.60219700  |
| C | 1.93931600  | 5.56585700  | 1.35004000  |
| C | 0.98347300  | 4.58955200  | 1.58574300  |
| C | 1.33685800  | 3.31659900  | 2.04757200  |
| C | 2.65694600  | 3.00647000  | 2.30777600  |
| N | -0.39612000 | 4.68618500  | 1.43499500  |
| C | -1.01495900 | 3.51566900  | 1.77776900  |
| O | -2.20568600 | 3.28510400  | 1.67226300  |
| C | -1.06812100 | 5.77217500  | 0.77198100  |
| C | 0.96102400  | 0.76815200  | 0.48869900  |
| C | 0.00449100  | 1.21450800  | 1.43384100  |
| C | -1.07439500 | 0.37047000  | 1.78514600  |
| H | 4.68123600  | 3.75341000  | 2.26974800  |
| H | 4.04371000  | 5.98667800  | 1.43076700  |
| H | 1.66094500  | 6.55259300  | 0.99383200  |
| H | 2.92143800  | 2.02265000  | 2.68636300  |
| H | -0.70780700 | 5.85591500  | -0.25921700 |
| H | -0.90327500 | 6.71201500  | 1.30812200  |
| H | -2.13371200 | 5.54013300  | 0.76954600  |
| H | 1.01914300  | -0.31197700 | 0.35789400  |
| N | -1.96057200 | -0.33077600 | 2.08387100  |
| H | 1.95109800  | 1.21999000  | 0.54219100  |
| C | 0.08266100  | 2.49767600  | 2.22397300  |
| O | -0.11287000 | 2.08920400  | 3.59961500  |
| C | -0.33870400 | 3.03272300  | 4.51977300  |
| O | -0.43970300 | 2.42269300  | 5.69620900  |
| C | -0.70436700 | 3.20629400  | 6.89466100  |
| C | -2.05169000 | 3.91215600  | 6.77396700  |
| H | -2.30060700 | 4.38063600  | 7.73143000  |
| H | -2.02537300 | 4.68004200  | 5.99978200  |
| H | -2.83308800 | 3.18507500  | 6.53214400  |
| C | 0.43999400  | 4.18361300  | 7.14750600  |
| H | 0.47781100  | 4.95629200  | 6.37858200  |
| H | 0.29856500  | 4.65964700  | 8.12291500  |
| H | 1.39329800  | 3.64606200  | 7.16318000  |
| C | -0.75094200 | 2.14117700  | 7.98369800  |
| H | -0.94602700 | 2.60732100  | 8.95380000  |
| H | -1.54233300 | 1.41657900  | 7.77325100  |
| H | 0.20267000  | 1.60810700  | 8.03428100  |
| O | -0.42820400 | 4.21793200  | 4.30153500  |

TS2

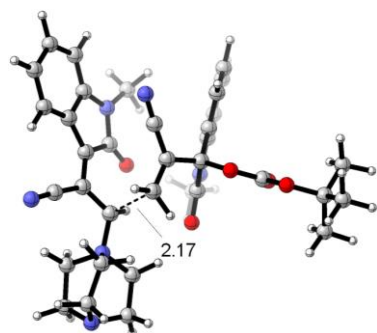

Zero-point correction= 0.698578 (Hartree/Particle)  
 Thermal correction to Energy= 0.739564  
 Thermal correction to Enthalpy= 0.740508  
 Thermal correction to Gibbs Free Energy= 0.625908  
 SCF Done: E(SOV) = -2061.01252792 A.U.

|   |             |             |             |
|---|-------------|-------------|-------------|
| C | -5.43835800 | -0.61279400 | 3.23664500  |
| C | -4.04533300 | -0.00970300 | 2.93550900  |
| N | -3.91916300 | 0.21106300  | 1.44085700  |
| C | 3.22184100  | 0.55576500  | 1.83172100  |
| C | 3.78021600  | 1.82112400  | 1.65302700  |
| C | 2.97147600  | 2.94601300  | 1.49378900  |
| C | 1.59938700  | 2.75947600  | 1.52945300  |
| C | 1.01050300  | 1.49145200  | 1.71672200  |
| C | 1.83898900  | 0.37945900  | 1.85650700  |
| N | 0.60228400  | 3.72154100  | 1.39891300  |
| C | -0.65171700 | 3.14900200  | 1.46132900  |
| C | -0.42736300 | 1.68960000  | 1.63115900  |
| O | -1.70656800 | 3.78456600  | 1.44569100  |
| C | 0.83189500  | 5.12121300  | 1.15075000  |
| C | -2.72945200 | 1.05207400  | 1.08805700  |
| C | -1.45694700 | 0.76710900  | 1.65506300  |
| C | -1.12885000 | -0.58939900 | 2.00777900  |
| H | -5.34328700 | -1.42765600 | 3.95948000  |
| H | -6.10661500 | 0.13892000  | 3.66671400  |
| H | -3.88233100 | 0.96404500  | 3.40104400  |
| H | -3.23330500 | -0.67819600 | 3.22356300  |
| H | 3.87032500  | -0.30697900 | 1.94352100  |
| H | 4.85948300  | 1.93459400  | 1.62750800  |
| H | 3.40050900  | 3.92989400  | 1.33471100  |
| H | 1.42666400  | -0.61503400 | 1.98295800  |
| H | 1.51994000  | 5.53189700  | 1.89715500  |
| H | 1.24445200  | 5.27338000  | 0.14676800  |
| H | -0.13040100 | 5.62877900  | 1.22268900  |
| H | -3.01185500 | 2.09758700  | 1.07275100  |
| C | -5.16056900 | 0.95018200  | 0.99432900  |
| H | -5.22457200 | 1.83706400  | 1.62981300  |
| H | -4.98727900 | 1.29725000  | -0.02427100 |
| C | -6.37578300 | 0.00896500  | 1.14637300  |
| H | -7.22182600 | 0.55761500  | 1.56938000  |
| H | -6.68938900 | -0.38328500 | 0.17446400  |
| N | -6.05401000 | -1.12402000 | 2.01349600  |
| C | -3.92978000 | -1.12981700 | 0.73991200  |
| H | -4.07220100 | -0.90841100 | -0.31948700 |

|   |             |             |             |
|---|-------------|-------------|-------------|
| H | -2.95781700 | -1.60062900 | 0.87602800  |
| C | -5.08457600 | -1.97564200 | 1.32501500  |
| H | -5.58752500 | -2.52156100 | 0.52205100  |
| H | -4.70272700 | -2.71043700 | 2.03988300  |
| N | -0.93386500 | -1.68909000 | 2.32211300  |
| C | 0.62755400  | 5.99363700  | -2.60120100 |
| C | 0.03137100  | 6.98588200  | -1.82797600 |
| C | -1.16644800 | 6.75348700  | -1.14398200 |
| C | -1.73716100 | 5.49732900  | -1.26750600 |
| C | -1.14867000 | 4.49156800  | -2.04081000 |
| C | 0.03547500  | 4.72852900  | -2.71269600 |
| N | -2.93755600 | 5.04602700  | -0.71858900 |
| C | -3.22198700 | 3.77968100  | -1.11982900 |
| O | -4.22383600 | 3.14541400  | -0.83232900 |
| C | -3.71506800 | 5.76714500  | 0.25503200  |
| C | -2.21070500 | 0.96212200  | -1.01983400 |
| C | -1.40636500 | 2.03089300  | -1.36984200 |
| C | 0.01037800  | 1.91249300  | -1.41994900 |
| H | 1.55748400  | 6.19849100  | -3.12070000 |
| H | 0.50187400  | 7.96152800  | -1.75072300 |
| H | -1.63246600 | 7.52922500  | -0.54493400 |
| H | 0.50002300  | 3.94593700  | -3.30378300 |
| H | -3.11508700 | 5.92357000  | 1.15714800  |
| H | -4.05046700 | 6.72557200  | -0.15346400 |
| H | -4.58335200 | 5.15366400  | 0.49687800  |
| H | -3.24140500 | 0.98609700  | -1.36194800 |
| N | 1.16869700  | 1.84343400  | -1.50866100 |
| H | -1.75203300 | -0.01781500 | -0.93096900 |
| C | -2.03179300 | 3.26738000  | -1.98305400 |
| O | -2.49724100 | 2.83839300  | -3.28737100 |
| C | -3.27083800 | 3.68660800  | -3.97792500 |
| O | -3.53047000 | 3.12153300  | -5.15284900 |
| C | -4.36800000 | 3.82054100  | -6.11936500 |
| C | -4.40237400 | 2.84922700  | -7.29330800 |
| H | -3.39172200 | 2.67625200  | -7.67355600 |
| H | -5.01679400 | 3.26020500  | -8.09943800 |
| H | -4.82515900 | 1.89003600  | -6.98133200 |
| C | -3.71295100 | 5.13584500  | -6.52938600 |
| H | -3.69240000 | 5.84282200  | -5.69938500 |
| H | -4.27655800 | 5.57712700  | -7.35743500 |
| H | -2.68922200 | 4.95263800  | -6.87017900 |
| C | -5.76809700 | 4.02384700  | -5.54784100 |
| H | -5.75401400 | 4.71923400  | -4.70788100 |
| H | -6.17764300 | 3.06541200  | -5.21356400 |
| H | -6.42274300 | 4.42364900  | -6.32848100 |
| O | -3.65538900 | 4.76081800  | -3.58150400 |

TS-3

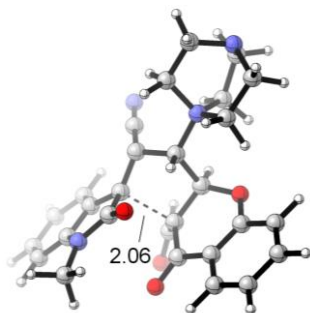

Zero-point correction= 0.508128 (Hartree/Particle)  
 Thermal correction to Energy= 0.536359  
 Thermal correction to Enthalpy= 0.537303  
 Thermal correction to Gibbs Free Energy= 0.450931  
 SCF Done: E(SOV) = -1602.32555299 A.U.

|   |             |             |             |
|---|-------------|-------------|-------------|
| C | -4.70990700 | -2.22456500 | 1.05881500  |
| C | -5.63236800 | -1.52878900 | 0.28290300  |
| C | -5.22031900 | -0.61463900 | -0.69101300 |
| C | -3.85892600 | -0.42726900 | -0.85087300 |
| C | -2.91407100 | -1.10974500 | -0.06970600 |
| C | -3.33806300 | -2.01322900 | 0.89332000  |
| N | -3.20946200 | 0.39067900  | -1.78047900 |
| C | -1.85111800 | 0.32232700  | -1.63421400 |
| C | -1.57604700 | -0.60191100 | -0.44844400 |
| O | -1.03816900 | 0.91331300  | -2.32671900 |
| C | -3.86354700 | 1.37831800  | -2.60509000 |
| C | 0.75247400  | -0.35489400 | -0.37163400 |
| C | -0.36388300 | -1.34893500 | -0.41752000 |
| C | -1.02585300 | 0.90846100  | 0.84224900  |
| C | 0.43703300  | 0.51731800  | 0.90793900  |
| H | -5.05704900 | -2.92882800 | 1.80692500  |
| H | -6.69426200 | -1.69611400 | 0.43416200  |
| H | -5.93980700 | -0.07297900 | -1.29586200 |
| H | -2.62228400 | -2.54674200 | 1.51060900  |
| H | -4.55583900 | 0.90128200  | -3.30554100 |
| H | -4.40172300 | 2.08847200  | -1.96943500 |
| H | -3.08477000 | 1.90311700  | -3.15915100 |
| H | 0.68947100  | 0.30728700  | -1.24121400 |
| H | 0.59867300  | -0.11571300 | 1.78679800  |
| C | -1.82702500 | 0.51529600  | 2.02130100  |
| O | -2.84840600 | 1.02458600  | 2.41242100  |
| C | 2.68905800  | -1.36914300 | 0.92401600  |
| H | 1.92233400  | -1.98142400 | 1.40006600  |
| H | 2.84180300  | -0.45422400 | 1.50205300  |
| C | 3.11782600  | 0.11954600  | -0.96089800 |
| H | 2.94595100  | 1.03559600  | -0.39987600 |
| H | 2.82602700  | 0.28261300  | -2.00164300 |
| C | 2.21682800  | -2.10459300 | -1.37527600 |
| H | 1.66578600  | -1.80831900 | -2.26966000 |
| H | 1.67980800  | -2.92112000 | -0.89308300 |
| N | 4.56464700  | -1.85776600 | -0.62534500 |
| C | 4.56374600  | -0.41048500 | -0.82203100 |
| H | 5.13729900  | -0.16494700 | -1.71999700 |

|   |             |             |             |
|---|-------------|-------------|-------------|
| H | 5.06733300  | 0.05337600  | 0.03130800  |
| C | 4.00503300  | -2.14913300 | 0.69512400  |
| H | 4.73305200  | -1.87846200 | 1.46483600  |
| H | 3.83009500  | -3.22662500 | 0.76406900  |
| C | 3.69880600  | -2.45709200 | -1.64106000 |
| H | 3.82477200  | -3.54294000 | -1.62674700 |
| H | 4.02348200  | -2.09746700 | -2.62199900 |
| N | 2.16793200  | -0.92689400 | -0.42228100 |
| C | -0.25961800 | -2.49995400 | 0.39038900  |
| N | -0.05911600 | -3.47155200 | 1.00906900  |
| C | -1.32956100 | 2.22143700  | 0.24003700  |
| H | -1.39774900 | -0.37127500 | 2.54985200  |
| O | -2.46458300 | 2.60928300  | 0.01380600  |
| C | -0.15150200 | 3.06729600  | -0.09791400 |
| C | -0.32620700 | 4.25869000  | -0.80651100 |
| C | 1.12612000  | 2.72915200  | 0.35166000  |
| C | 0.74727100  | 5.09741400  | -1.06219800 |
| H | -1.33324500 | 4.49812700  | -1.13309800 |
| C | 2.21248400  | 3.57404100  | 0.11649000  |
| C | 2.01701000  | 4.75348700  | -0.58935400 |
| H | 0.60368900  | 6.01969200  | -1.61484500 |
| H | 3.18736300  | 3.30293200  | 0.51120400  |
| H | 2.86102500  | 5.41194600  | -0.77096500 |
| O | 1.36797300  | 1.58625700  | 1.06098700  |

#### TS4

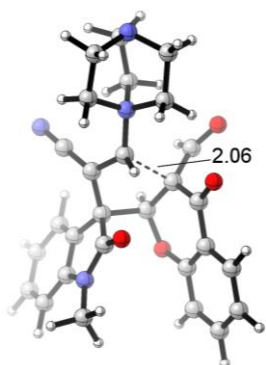

Zero-point correction= 0.507861 (Hartree/Particle)  
 Thermal correction to Energy= 0.536180  
 Thermal correction to Enthalpy= 0.537124  
 Thermal correction to Gibbs Free Energy= 0.450456  
 SCF Done: E(SOV) = -1602.32128226 A.U.

|   |             |             |             |
|---|-------------|-------------|-------------|
| C | -4.54008000 | -1.35382600 | 1.07802000  |
| C | -5.33408700 | -0.64776200 | 0.18048100  |
| C | -4.76636800 | 0.15308200  | -0.81609800 |
| C | -3.38420000 | 0.21216600  | -0.87259200 |
| C | -2.56979600 | -0.49111400 | 0.02328000  |
| C | -3.14354400 | -1.27315200 | 1.00842900  |
| N | -2.58826700 | 0.92083400  | -1.78050700 |
| C | -1.25499200 | 0.71175000  | -1.53940100 |
| C | -1.13502600 | -0.14112300 | -0.26105900 |
| O | -0.34156500 | 1.14624100  | -2.21759100 |
| C | -3.08246100 | 1.75907600  | -2.84580200 |
| C | 1.16257400  | -0.65558100 | -0.50388000 |



|   |             |             |             |
|---|-------------|-------------|-------------|
| C | -0.11713500 | -1.22879000 | -0.38560600 |
| C | -0.54881600 | 0.79790000  | 0.90740300  |
| C | 0.93749500  | 0.96377500  | 0.75537800  |
| H | -5.00421500 | -1.97286400 | 1.83824300  |
| H | -6.41514300 | -0.71814700 | 0.24981700  |
| H | -5.38541900 | 0.70450000  | -1.51643500 |
| H | -2.52524500 | -1.83015200 | 1.70656600  |
| H | -2.21469000 | 2.14792800  | -3.38030200 |
| H | -3.71203300 | 1.18280900  | -3.53158100 |
| H | -3.66099400 | 2.59283700  | -2.43439500 |
| H | 1.33344800  | 0.05780700  | -1.30720800 |
| C | 2.58233700  | -2.20640900 | 0.93881900  |
| H | 1.63463300  | -2.65084900 | 1.23706700  |
| H | 2.87736500  | -1.43669100 | 1.65016600  |
| C | 3.62048500  | -0.62906100 | -0.61232300 |
| H | 3.54225000  | 0.24168000  | 0.04134500  |
| H | 3.55661300  | -0.28440900 | -1.64768600 |
| C | 2.35626800  | -2.53503200 | -1.49736300 |
| H | 2.04362700  | -2.01370600 | -2.40439100 |
| H | 1.58363300  | -3.25422400 | -1.21941200 |
| N | 4.53667300  | -2.92643400 | -0.40034100 |
| C | 4.86649300  | -1.49960600 | -0.34327400 |
| H | 5.64016300  | -1.27826400 | -1.08365900 |
| H | 5.27933100  | -1.28083200 | 0.64578800  |
| C | 3.70066700  | -3.25703200 | 0.75459500  |
| H | 4.31971300  | -3.28744900 | 1.65520500  |
| H | 3.27926800  | -4.25515500 | 0.60192800  |
| C | 3.75906800  | -3.17421800 | -1.61221700 |
| H | 3.65830100  | -4.25238100 | -1.76516200 |
| H | 4.30871600  | -2.76433800 | -2.46471700 |
| N | 2.39452500  | -1.49699500 | -0.38909000 |
| C | -0.37006700 | -2.52184500 | 0.10289100  |
| N | -0.53700400 | -3.61825800 | 0.46853000  |
| C | -0.89346800 | 3.08801900  | 0.31422900  |
| C | -1.82281800 | 4.12006200  | 0.16358000  |
| C | 0.39861100  | 3.21627900  | -0.20611000 |
| C | -1.45463900 | 5.27656100  | -0.50765300 |
| H | -2.81573700 | 3.98698500  | 0.58007900  |
| C | 0.74619900  | 4.38723300  | -0.88715500 |
| C | -0.16747300 | 5.41678300  | -1.03902300 |
| H | -2.17902200 | 6.07730800  | -0.62241000 |
| H | 1.75280100  | 4.45214800  | -1.28791600 |
| H | 0.10906900  | 6.32262200  | -1.56770100 |
| C | 1.74206000  | 0.62970500  | 1.92487700  |
| H | 1.16945600  | 0.08117600  | 2.70860000  |
| O | 2.93300900  | 0.84281200  | 2.09237700  |
| H | -0.77434800 | 0.25278100  | 1.83089200  |
| C | 1.38899000  | 2.12705600  | -0.04620400 |

|   |             |            |             |
|---|-------------|------------|-------------|
| O | 2.51168200  | 2.19714300 | -0.52508100 |
| O | -1.31643500 | 1.98696600 | 0.98828100  |

1a

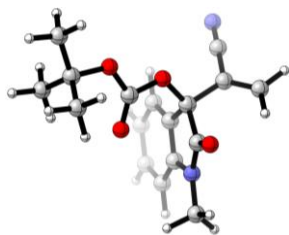

|                                          |                             |
|------------------------------------------|-----------------------------|
| Zero-point correction=                   | 0.330527 (Hartree/Particle) |
| Thermal correction to Energy=            | 0.352545                    |
| Thermal correction to Enthalpy=          | 0.353489                    |
| Thermal correction to Gibbs Free Energy= | 0.279166                    |
| SCF Done: E(SOV) =                       | -1068.97734754 A.U.         |

|   |             |            |             |
|---|-------------|------------|-------------|
| C | 0.85855700  | 5.41389000 | 2.63860900  |
| C | 0.37572500  | 6.40262300 | 1.78662300  |
| C | -0.84800300 | 6.26130300 | 1.12401400  |
| C | -1.56109400 | 5.09579400 | 1.34686900  |
| C | -1.08205900 | 4.09224100 | 2.19532800  |
| C | 0.12661800  | 4.23942700 | 2.84967300  |
| N | -2.80564000 | 4.73503300 | 0.81727000  |
| C | -3.24609600 | 3.54842600 | 1.34318900  |
| O | -4.31960100 | 3.02428800 | 1.15455900  |
| C | -3.65418100 | 5.61448800 | 0.04830700  |
| C | -2.01920000 | 1.12566300 | 0.42965400  |
| C | -1.51302700 | 1.71430600 | 1.51508900  |
| C | -0.33749900 | 1.17024000 | 2.15038800  |
| H | 1.80940300  | 5.55190200 | 3.14155100  |
| H | 0.95638400  | 7.30664000 | 1.63150800  |
| H | -1.22431200 | 7.03892300 | 0.46761800  |
| H | 0.49715500  | 3.46285200 | 3.51187500  |
| H | -3.15826600 | 5.90444300 | -0.88269100 |
| H | -3.89757900 | 6.51231400 | 0.62618300  |
| H | -4.57050400 | 5.06823100 | -0.17823900 |
| H | -2.92304400 | 1.49625500 | -0.03969200 |
| N | 0.60793800  | 0.75384700 | 2.67114700  |
| H | -1.54353800 | 0.24686100 | 0.00839300  |
| C | -2.07845500 | 2.95642200 | 2.18465100  |
| O | -2.50908200 | 2.51411900 | 3.46795300  |
| C | -3.20825900 | 3.41412300 | 4.18981500  |
| O | -3.51700000 | 2.84575900 | 5.34081500  |
| C | -4.29849500 | 3.58732400 | 6.32989900  |
| C | -4.45496400 | 2.57177700 | 7.45463400  |
| H | -3.47508300 | 2.25759100 | 7.82419600  |
| H | -5.01729000 | 3.01673700 | 8.28027900  |
| H | -4.99212000 | 1.68859600 | 7.09792600  |
| C | -3.50811900 | 4.80339100 | 6.80077300  |
| H | -3.38339800 | 5.53024500 | 5.99679600  |
| H | -4.04148700 | 5.28193200 | 7.62783300  |
| H | -2.52284500 | 4.49298600 | 7.16200700  |
| C | -5.65756000 | 3.96355500 | 5.74964200  |

|   |             |            |            |
|---|-------------|------------|------------|
| H | -5.56207400 | 4.71351700 | 4.96399400 |
| H | -6.14872800 | 3.07580500 | 5.33975300 |
| H | -6.28736700 | 4.36677200 | 6.54864300 |
| O | -3.47780200 | 4.52648300 | 3.80624800 |

4a

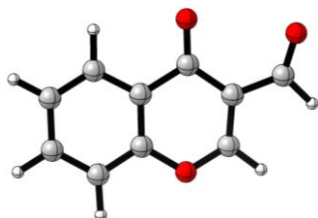

Zero-point correction= 0.365043 (Hartree/Particle)  
 Thermal correction to Energy= 0.384176  
 Thermal correction to Enthalpy= 0.385121  
 Thermal correction to Gibbs Free Energy= 0.317273  
 SCF Done: E(SOV) = -992.038859845 A.U.

|   |             |             |             |
|---|-------------|-------------|-------------|
| C | -4.97652100 | -1.81842700 | -1.57824200 |
| C | -3.88795000 | -0.73731100 | -1.78106500 |
| N | -3.59370800 | -0.08279600 | -0.44595700 |
| C | 3.46970600  | 0.51578700  | -1.74226200 |
| C | 4.01940300  | 1.79044000  | -1.61690600 |
| C | 3.21546700  | 2.87644500  | -1.26258800 |
| C | 1.86731400  | 2.64243700  | -1.04292400 |
| C | 1.28291500  | 1.35463100  | -1.16442600 |
| C | 2.10997300  | 0.28805800  | -1.51973200 |
| N | 0.88561700  | 3.55314600  | -0.68325800 |
| C | -0.35093300 | 2.92068200  | -0.55593700 |
| C | -0.12559800 | 1.51696800  | -0.85780500 |
| O | -1.39140000 | 3.50948700  | -0.24334800 |
| C | 1.08181800  | 4.96091200  | -0.46951100 |
| C | -2.48914400 | 0.89415900  | -0.51191600 |
| C | -1.17976500 | 0.58708700  | -0.82131800 |
| C | -0.83700200 | -0.78162600 | -1.14385000 |
| H | -4.53769000 | -2.81953400 | -1.61682300 |
| H | -5.72511900 | -1.75137100 | -2.37268800 |
| H | -4.20265600 | 0.07711100  | -2.43718200 |
| H | -2.95548900 | -1.15090400 | -2.16038800 |
| H | 4.10638400  | -0.31909100 | -2.01837600 |
| H | 5.07908200  | 1.94454300  | -1.79487000 |
| H | 3.63099200  | 3.87462600  | -1.16043600 |
| H | 1.71429600  | -0.71592000 | -1.62618900 |
| H | 1.44224900  | 5.45130900  | -1.38131700 |
| H | 1.80458600  | 5.13940100  | 0.33493400  |
| H | 0.11344600  | 5.37928800  | -0.18961900 |
| H | -2.75774700 | 1.90677700  | -0.25509100 |
| C | -4.83545600 | 0.67379200  | -0.04412600 |
| H | -4.90297600 | 1.53215100  | -0.71507000 |
| H | -4.64825800 | 1.04179500  | 0.96744100  |
| C | -6.05888200 | -0.26851300 | -0.13761600 |
| H | -6.68215500 | -0.00819400 | -0.99793800 |
| H | -6.67549900 | -0.17410100 | 0.76041300  |

|   |             |             |             |
|---|-------------|-------------|-------------|
| N | -5.63580900 | -1.65821600 | -0.28319100 |
| C | -3.37167200 | -1.16145400 | 0.59874100  |
| H | -3.05525200 | -0.63699100 | 1.50165000  |
| H | -2.54478800 | -1.77665900 | 0.24438400  |
| C | -4.68018900 | -1.97196200 | 0.77699600  |
| H | -5.15103600 | -1.74671400 | 1.73852200  |
| H | -4.46464800 | -3.04344100 | 0.75502500  |
| N | -0.61803600 | -1.89103500 | -1.39704800 |

### Int-II

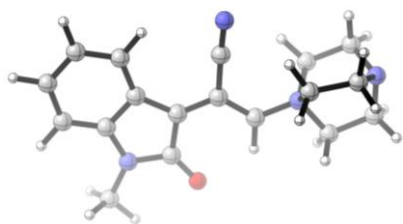

Zero-point correction= 0.365043 (Hartree/Particle)  
 Thermal correction to Energy= 0.384176  
 Thermal correction to Enthalpy= 0.385121  
 Thermal correction to Gibbs Free Energy= 0.317273  
 SCF Done: E(SOV) = -992.038859845 A.U.

|   |             |             |             |
|---|-------------|-------------|-------------|
| C | -4.97652100 | -1.81842700 | -1.57824200 |
| C | -3.88795000 | -0.73731100 | -1.78106500 |
| N | -3.59370800 | -0.08279600 | -0.44595700 |
| C | 3.46970600  | 0.51578700  | -1.74226200 |
| C | 4.01940300  | 1.79044000  | -1.61690600 |
| C | 3.21546700  | 2.87644500  | -1.26258800 |
| C | 1.86731400  | 2.64243700  | -1.04292400 |
| C | 1.28291500  | 1.35463100  | -1.16442600 |
| C | 2.10997300  | 0.28805800  | -1.51973200 |
| N | 0.88561700  | 3.55314600  | -0.68325800 |
| C | -0.35093300 | 2.92068200  | -0.55593700 |
| C | -0.12559800 | 1.51696800  | -0.85780500 |
| O | -1.39140000 | 3.50948700  | -0.24334800 |
| C | 1.08181800  | 4.96091200  | -0.46951100 |
| C | -2.48914400 | 0.89415900  | -0.51191600 |
| C | -1.17976500 | 0.58708700  | -0.82131800 |
| C | -0.83700200 | -0.78162600 | -1.14385000 |
| H | -4.53769000 | -2.81953400 | -1.61682300 |
| H | -5.72511900 | -1.75137100 | -2.37268800 |
| H | -4.20265600 | 0.07711100  | -2.43718200 |
| H | -2.95548900 | -1.15090400 | -2.16038800 |
| H | 4.10638400  | -0.31909100 | -2.01837600 |
| H | 5.07908200  | 1.94454300  | -1.79487000 |
| H | 3.63099200  | 3.87462600  | -1.16043600 |
| H | 1.71429600  | -0.71592000 | -1.62618900 |
| H | 1.44224900  | 5.45130900  | -1.38131700 |
| H | 1.80458600  | 5.13940100  | 0.33493400  |
| H | 0.11344600  | 5.37928800  | -0.18961900 |
| H | -2.75774700 | 1.90677700  | -0.25509100 |
| C | -4.83545600 | 0.67379200  | -0.04412600 |
| H | -4.90297600 | 1.53215100  | -0.71507000 |

|   |             |             |             |
|---|-------------|-------------|-------------|
| H | -4.64825800 | 1.04179500  | 0.96744100  |
| C | -6.05888200 | -0.26851300 | -0.13761600 |
| H | -6.68215500 | -0.00819400 | -0.99793800 |
| H | -6.67549900 | -0.17410100 | 0.76041300  |
| N | -5.63580900 | -1.65821600 | -0.28319100 |
| C | -3.37167200 | -1.16145400 | 0.59874100  |
| H | -3.05525200 | -0.63699100 | 1.50165000  |
| H | -2.54478800 | -1.77665900 | 0.24438400  |
| C | -4.68018900 | -1.97196200 | 0.77699600  |
| H | -5.15103600 | -1.74671400 | 1.73852200  |
| H | -4.46464800 | -3.04344100 | 0.75502500  |
| N | -0.61803600 | -1.89103500 | -1.39704800 |

## 10. X-Ray crystallographic data for compounds 7a, 8d, and 9a.

Data intensity of racemic compound **7a** was collected using a Bruker 'Bruker APEX-II CCD' diffractometer at 100 (10) K. Data collection and reduction were done by using Olex2 and the structure was solved with the ShelXS structure solution program using direct methods and refined by full-matrix least-squares on  $F^2$  with anisotropic displacement parameters for non-H atoms using SHELX-97. Hydrogen atoms were added at their geometrically ideal positions and refined isotropically. CCDC 2055637 (racemic **7a**).

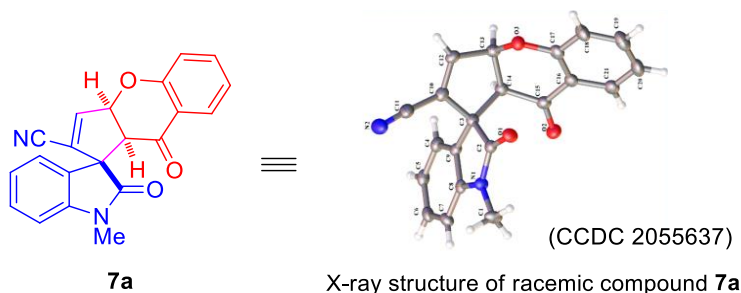

### Crystal data

|                                                |                                                               |
|------------------------------------------------|---------------------------------------------------------------|
| Identification code                            | 20191130-1                                                    |
| Empirical formula                              | $C_{21}H_{14}N_2O_3$                                          |
| Formula weight                                 | 342.34                                                        |
| Temperature/K                                  | 100.00(10)                                                    |
| Crystal system                                 | hexagonal                                                     |
| Space group                                    | $P6_1$                                                        |
| $a/\text{\AA}$                                 | 19.9112(5)                                                    |
| $b/\text{\AA}$                                 | 19.9112(5)                                                    |
| $c/\text{\AA}$                                 | 9.2146(3)                                                     |
| $\alpha/^\circ$                                | 90                                                            |
| $\beta/^\circ$                                 | 90                                                            |
| $\gamma/^\circ$                                | 120                                                           |
| Volume/ $\text{\AA}^3$                         | 3163.73(15)                                                   |
| Z                                              | 6                                                             |
| $\rho_{\text{calc}}/\text{g cm}^{-3}$          | 1.3455                                                        |
| $\mu/\text{mm}^{-1}$                           | 2.983                                                         |
| F(000)                                         | 1328.2                                                        |
| Crystal size/ $\text{mm}^3$                    | 0.11 × 0.1 × 0.08                                             |
| Radiation                                      | Cu $K\alpha$ ( $\lambda = 1.54184$ )                          |
| 2 $\theta$ range for data collection/ $^\circ$ | 5.12 to 147.26                                                |
| Index ranges                                   | $-23 \leq h \leq 9, -16 \leq k \leq 24, -11 \leq l \leq 11$   |
| Reflections collected                          | 8009                                                          |
| Independent reflections                        | 3821 [ $R_{\text{int}} = 0.0420, R_{\text{sigma}} = 0.0540$ ] |
| Data/restraints/parameters                     | 3821/1/263                                                    |
| Goodness-of-fit on $F^2$                       | 1.033                                                         |
| Final R indexes [ $I \geq 2\sigma(I)$ ]        | $R_1 = 0.0417, W R_2 = 0.0981$                                |
| Final R indexes [all data]                     | $R_1 = 0.0485, W R_2 = 0.1027$                                |
| Largest diff. Peak/hole / $e \text{\AA}^{-3}$  | 0.22/-0.30                                                    |

Data intensity of racemic compound **8d** was collected using a Bruker 'Bruker APEX-II CCD' diffractometer at 149.99(10) K. Data collection and reduction were done by using Olex2 and the structure was solved with the ShelXS structure solution program using direct methods and refined by full-matrix least-squares on  $F^2$  with anisotropic displacement parameters for non-H atoms using SHELX-97. Hydrogen atoms were added at their geometrically ideal positions and refined isotropically. CCDC 2055640 (**8d**).

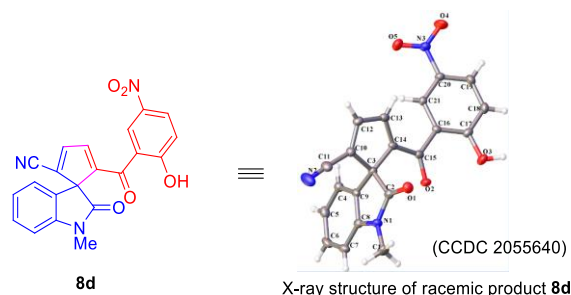

#### Crystal data

|                                                |                                                                  |
|------------------------------------------------|------------------------------------------------------------------|
| Identification code                            | lyl-10-19-01                                                     |
| Empirical formula                              | $C_{21}H_{13}N_3O_5$                                             |
| Formula weight                                 | 387.34                                                           |
| Temperature/K                                  | 149.99(10)                                                       |
| Crystal system                                 | triclinic                                                        |
| Space group                                    | P-1                                                              |
| $a/\text{\AA}$                                 | 7.6966(5)                                                        |
| $b/\text{\AA}$                                 | 8.9106(5)                                                        |
| $c/\text{\AA}$                                 | 13.8343(9)                                                       |
| $\alpha/^\circ$                                | 74.371(5)                                                        |
| $\beta/^\circ$                                 | 81.939(5)                                                        |
| $\gamma/^\circ$                                | 71.066(5)                                                        |
| Volume/ $\text{\AA}^3$                         | 862.80(10)                                                       |
| Z                                              | 2                                                                |
| $\rho_{\text{calc}}/\text{g cm}^{-3}$          | 1.491                                                            |
| $\mu/\text{mm}^{-1}$                           | 0.109                                                            |
| F(000)                                         | 400.0                                                            |
| Crystal size/ $\text{mm}^3$                    | 0.13 × 0.12 × 0.1                                                |
| Radiation                                      | Mo $K\alpha$ ( $\lambda = 0.71073$ )                             |
| 2 $\theta$ range for data collection/ $^\circ$ | 4.978 to 58.806                                                  |
| Index ranges                                   | $-9 \leq h \leq 10$ , $-8 \leq k \leq 11$ , $-12 \leq l \leq 18$ |
| Reflections collected                          | 6640                                                             |
| Independent reflections                        | 3985 [ $R_{\text{int}} = 0.0248$ , $R_{\text{sigma}} = 0.0482$ ] |
| Data/restraints/parameters                     | 3985/0/268                                                       |
| Goodness-of-fit on $F^2$                       | 1.048                                                            |
| Final R indexes [ $l \geq 2\sigma(l)$ ]        | $R_1 = 0.0485$ , $W R_2 = 0.1142$                                |
| Final R indexes [all data]                     | $R_1 = 0.0631$ , $W R_2 = 0.1255$                                |
| Largest diff. Peak/hole / $e \text{\AA}^{-3}$  | 0.33/-0.25                                                       |

Data intensity of racemic compound **9a** was collected using a Bruker 'Bruker APEX-II CCD' diffractometer at 100.00(10) K. Data collection and reduction were done by using Olex2 and the structure was solved with the ShelXS structure solution program using direct methods and refined by full-matrix least-squares on  $F^2$  with anisotropic displacement parameters for non-H atoms using SHELX-97. Hydrogen atoms were added at their geometrically ideal positions and refined isotropically. CCDC 2055644 (**9a**).

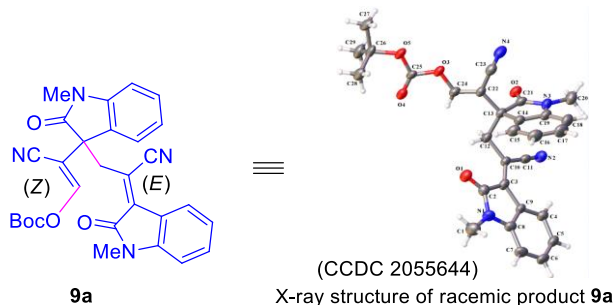

#### Crystal data

|                                             |                                                               |
|---------------------------------------------|---------------------------------------------------------------|
| Identification code                         | 20191113                                                      |
| Empirical formula                           | C <sub>29</sub> H <sub>26</sub> N <sub>4</sub> O <sub>5</sub> |
| Formula weight                              | 510.54                                                        |
| Temperature/K                               | 100.00(10)                                                    |
| Crystal system                              | triclinic                                                     |
| Space group                                 | P-1                                                           |
| a/Å                                         | 11.538(3)                                                     |
| b/Å                                         | 12.0654(11)                                                   |
| c/Å                                         | 12.568(2)                                                     |
| $\alpha$ /°                                 | 94.880(10)                                                    |
| $\beta$ /°                                  | 104.196(17)                                                   |
| $\gamma$ /°                                 | 91.692(12)                                                    |
| Volume/Å <sup>3</sup>                       | 1687.7(5)                                                     |
| Z                                           | 2                                                             |
| $\rho_{\text{calc}}/\text{cm}^3$            | 1.005                                                         |
| $\mu/\text{mm}^{-1}$                        | 0.573                                                         |
| F(000)                                      | 536.0                                                         |
| Crystal size/mm <sup>3</sup>                | 0.12 × 0.11 × 0.1                                             |
| Radiation                                   | CuK $\alpha$ ( $\lambda$ = 1.54184)                           |
| 2 $\theta$ range for data collection/°      | 7.288 to 147.738                                              |
| Index ranges                                | -14 ≤ h ≤ 13, -14 ≤ k ≤ 10, -15 ≤ l ≤ 15                      |
| Reflections collected                       | 11284                                                         |
| Independent reflections                     | 6558 [R <sub>int</sub> = 0.0808, R <sub>sigma</sub> = 0.1102] |
| Data/restraints/parameters                  | 6558/0/348                                                    |
| Goodness-of-fit on F <sup>2</sup>           | 1.042                                                         |
| Final R indexes [ $I \geq 2\sigma(I)$ ]     | R <sub>1</sub> = 0.1011, W <sub>r2</sub> = 0.2790             |
| Final R indexes [all data]                  | R <sub>1</sub> = 0.1462, W <sub>r2</sub> = 0.3325             |
| Largest diff. Peak/hole / e Å <sup>-3</sup> | 0.41/-0.43                                                    |



11. Copies of  $^1\text{H}$  NMR and  $^{13}\text{C}$  NMR Spectra of Compounds 7, 8, and 9

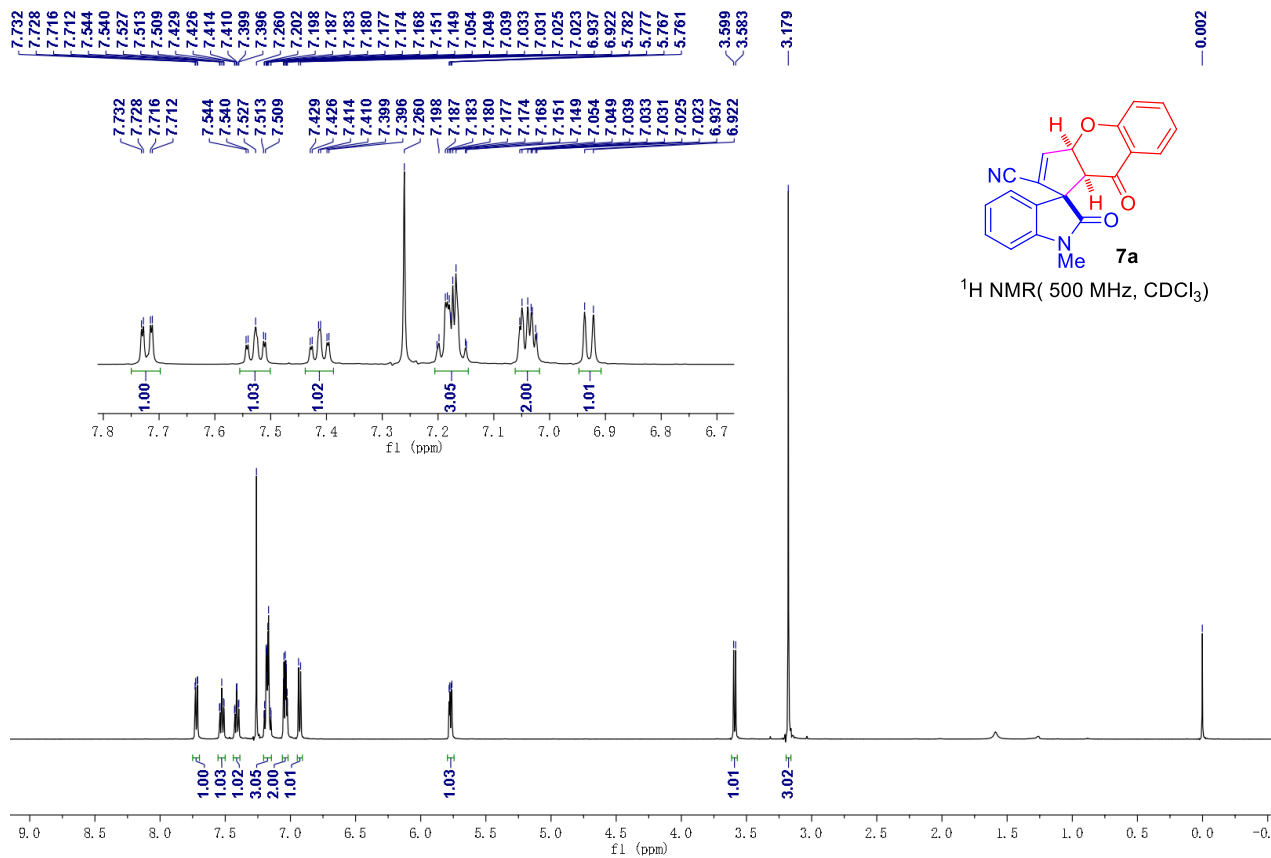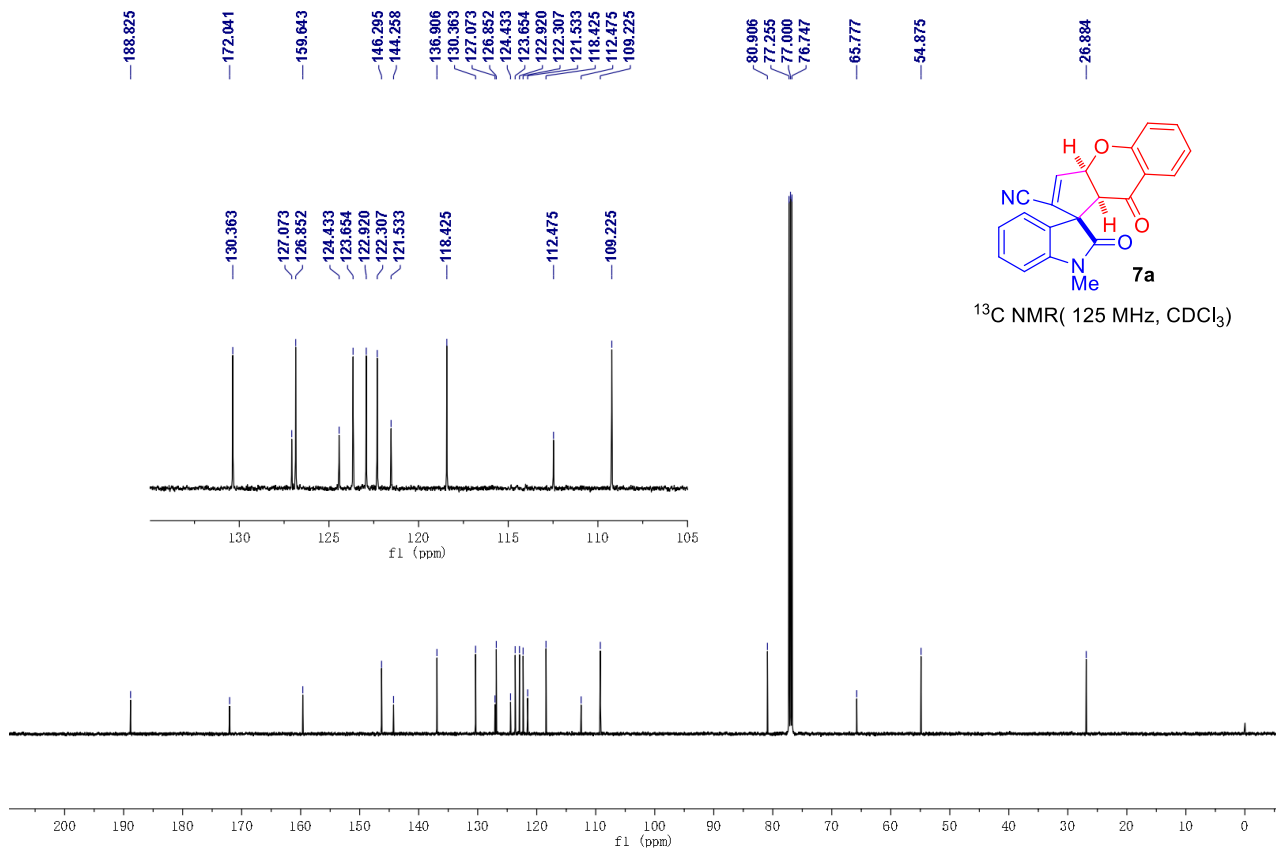

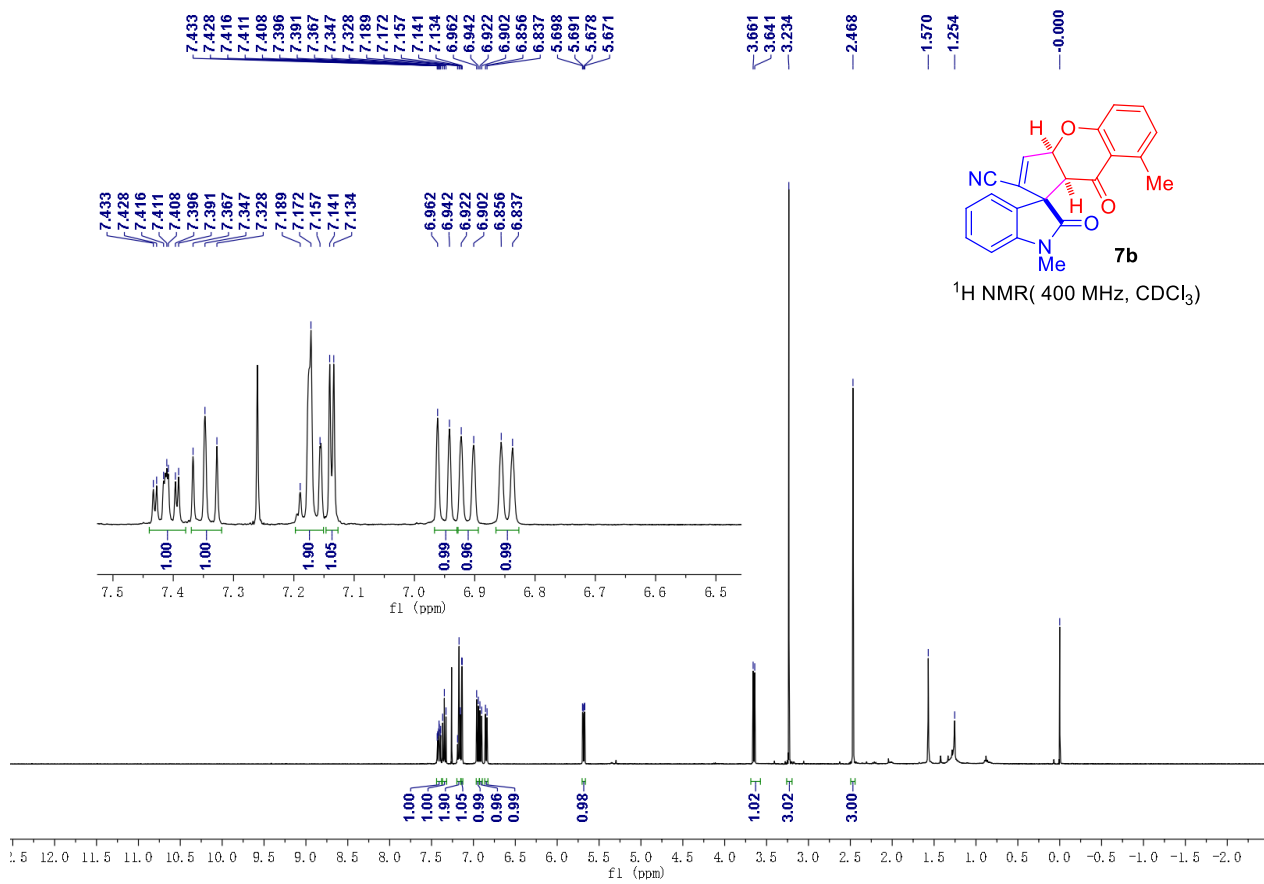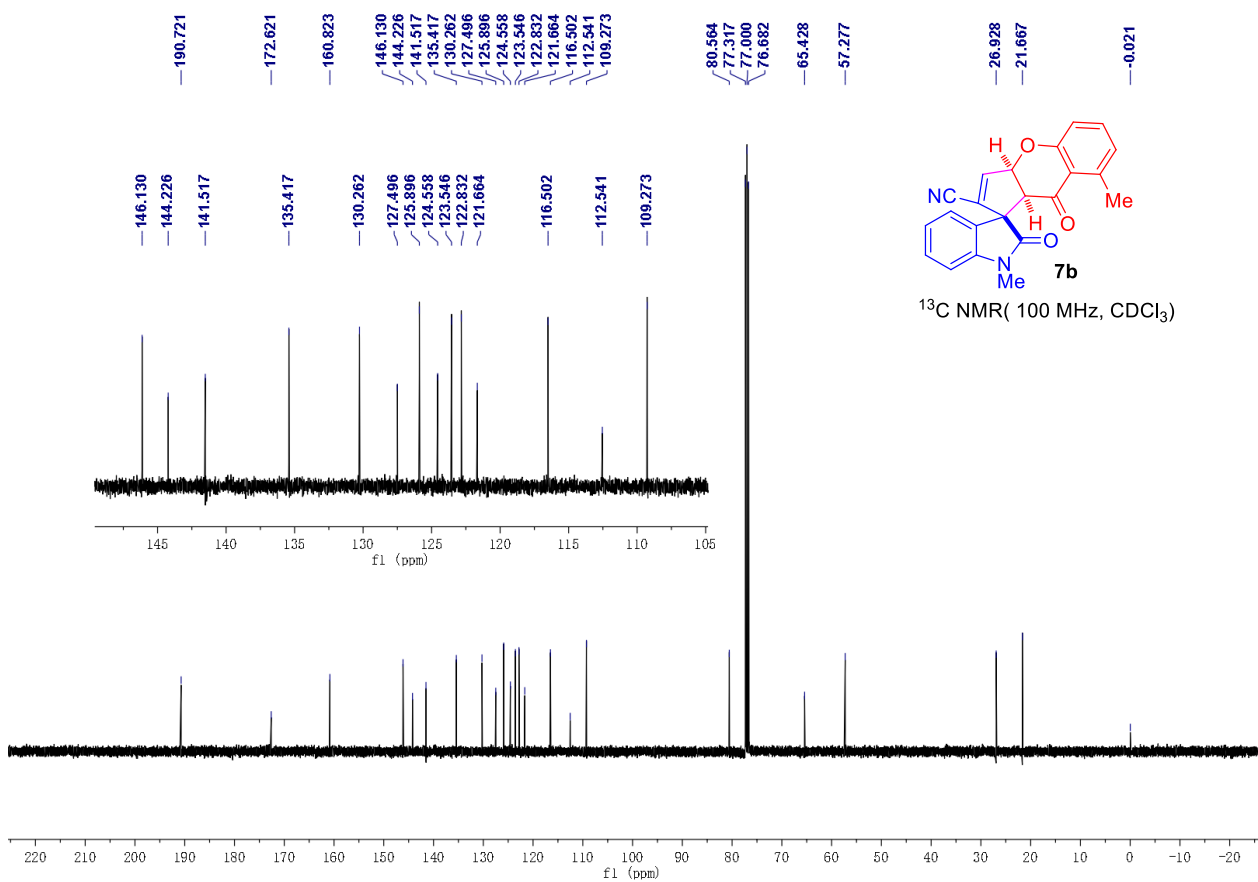

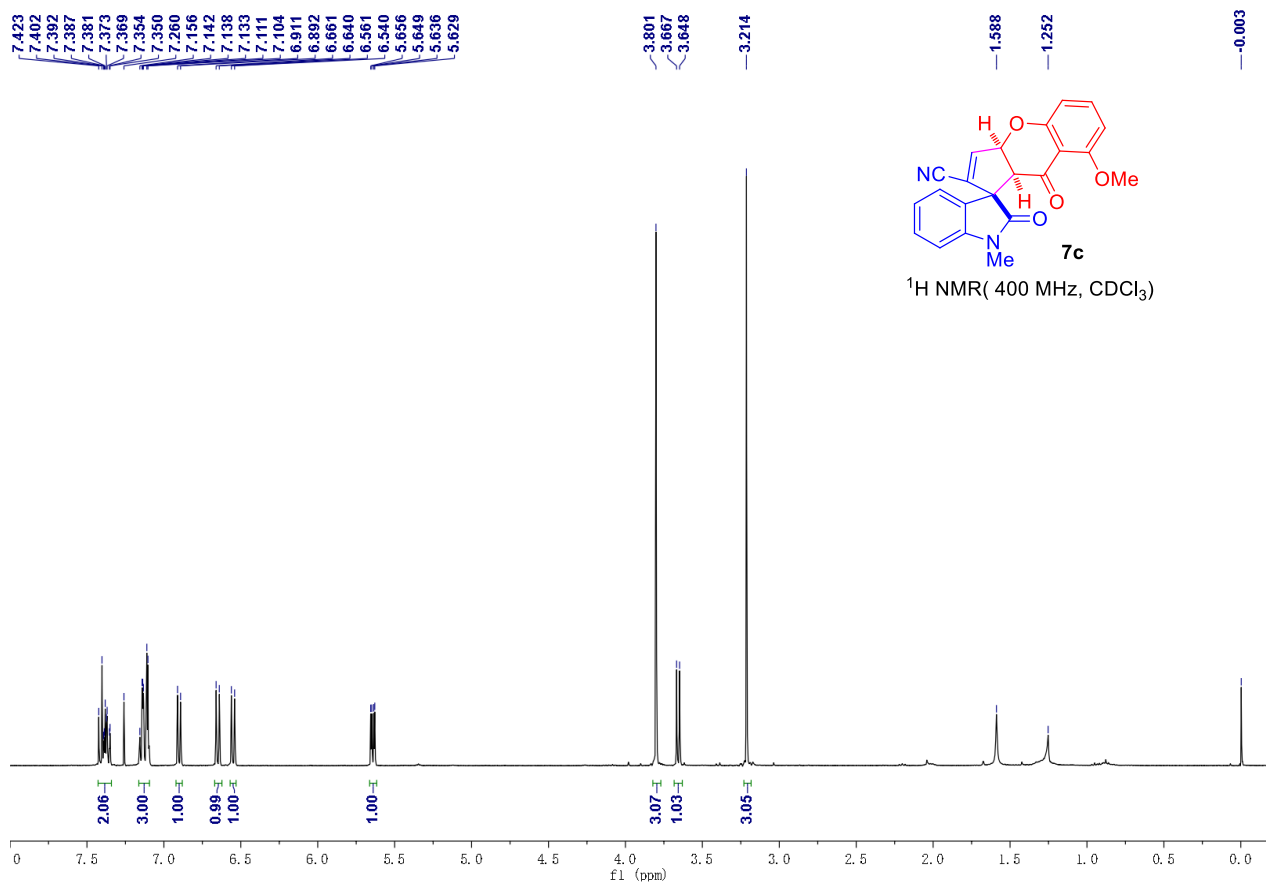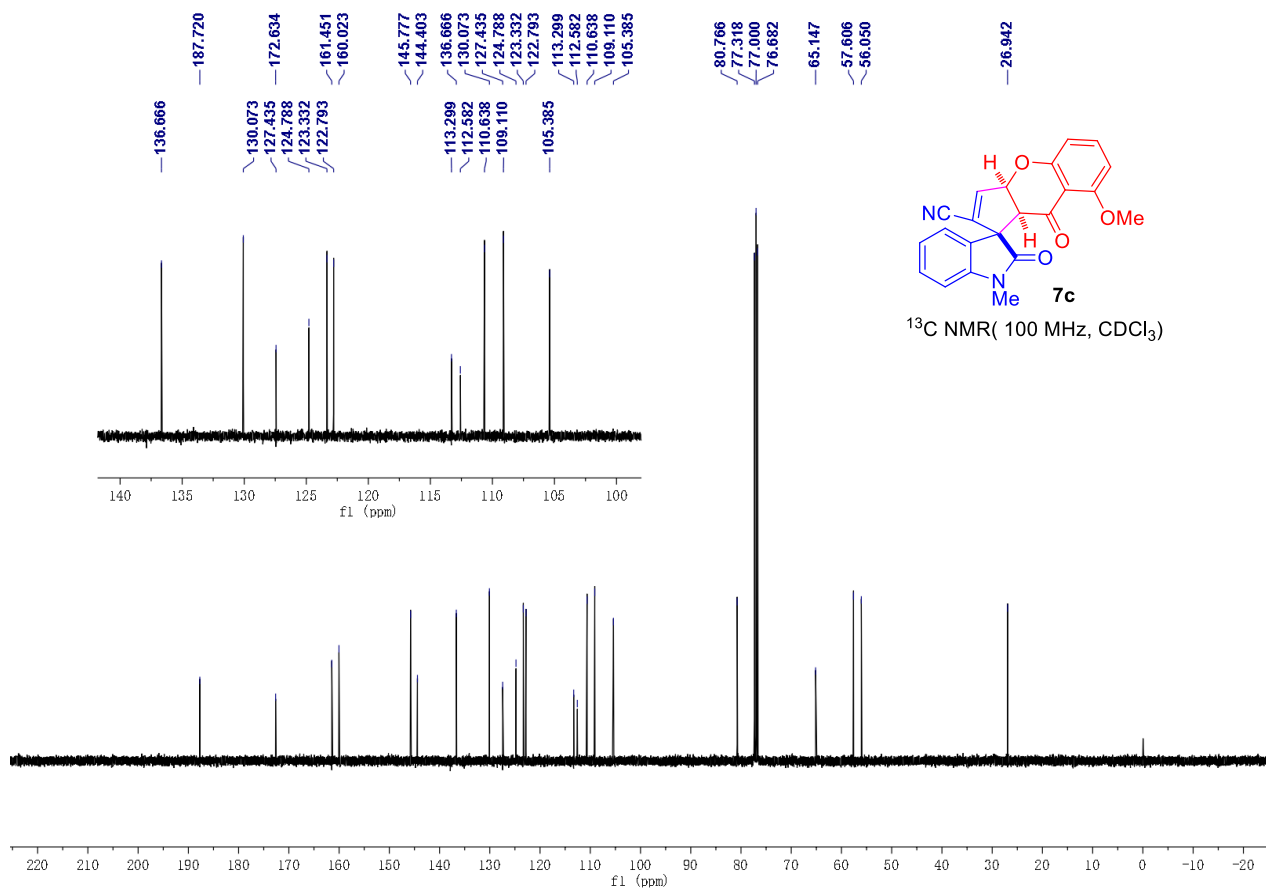

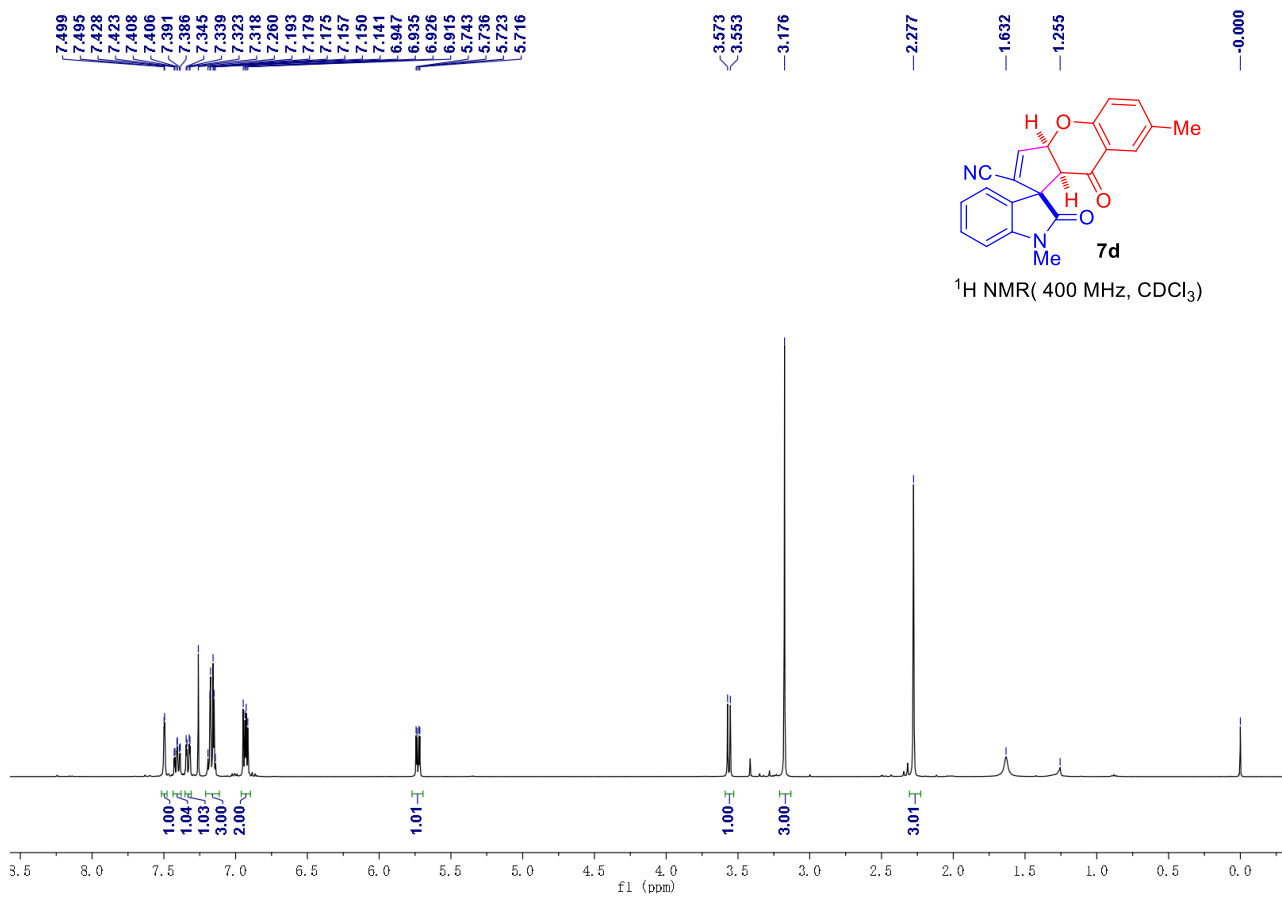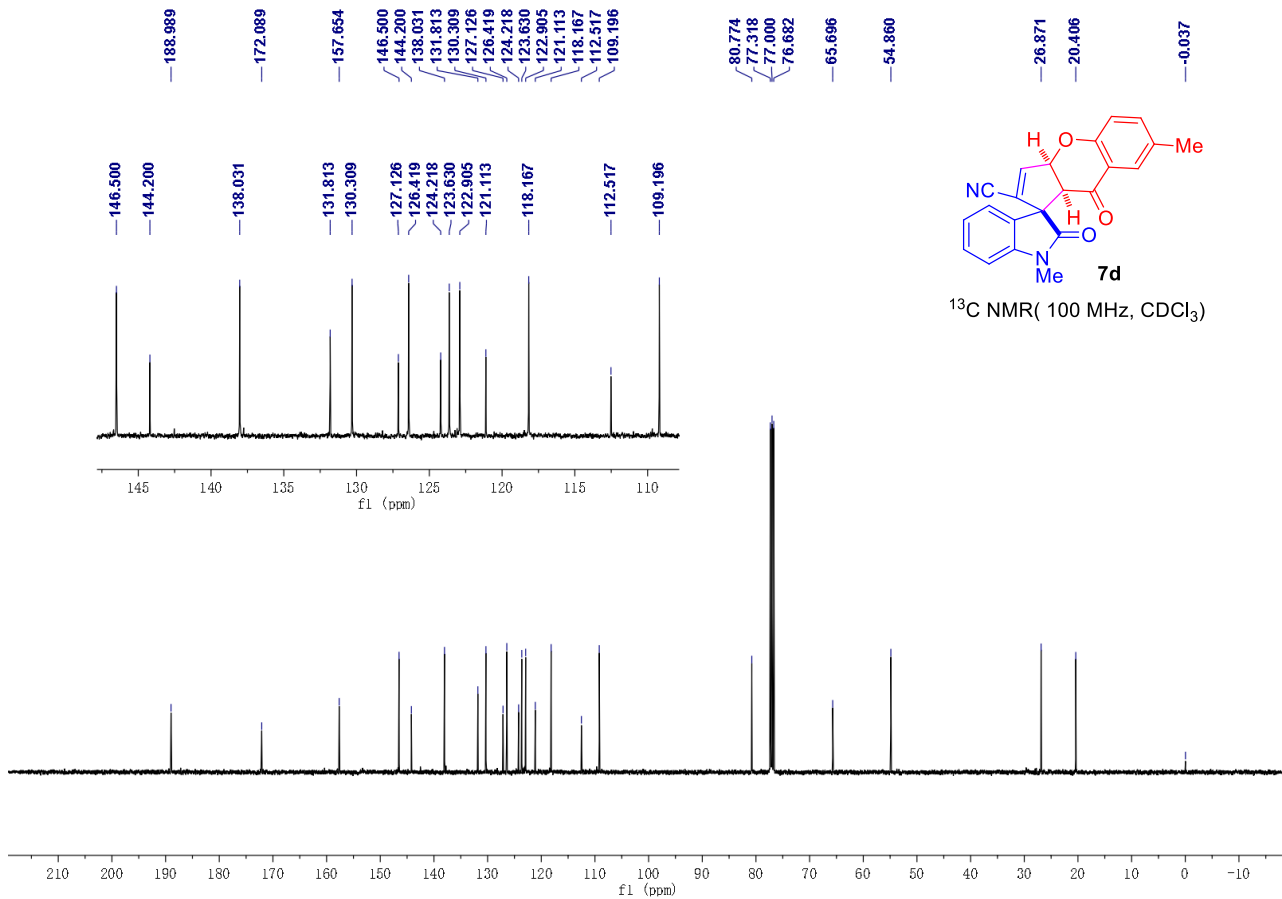

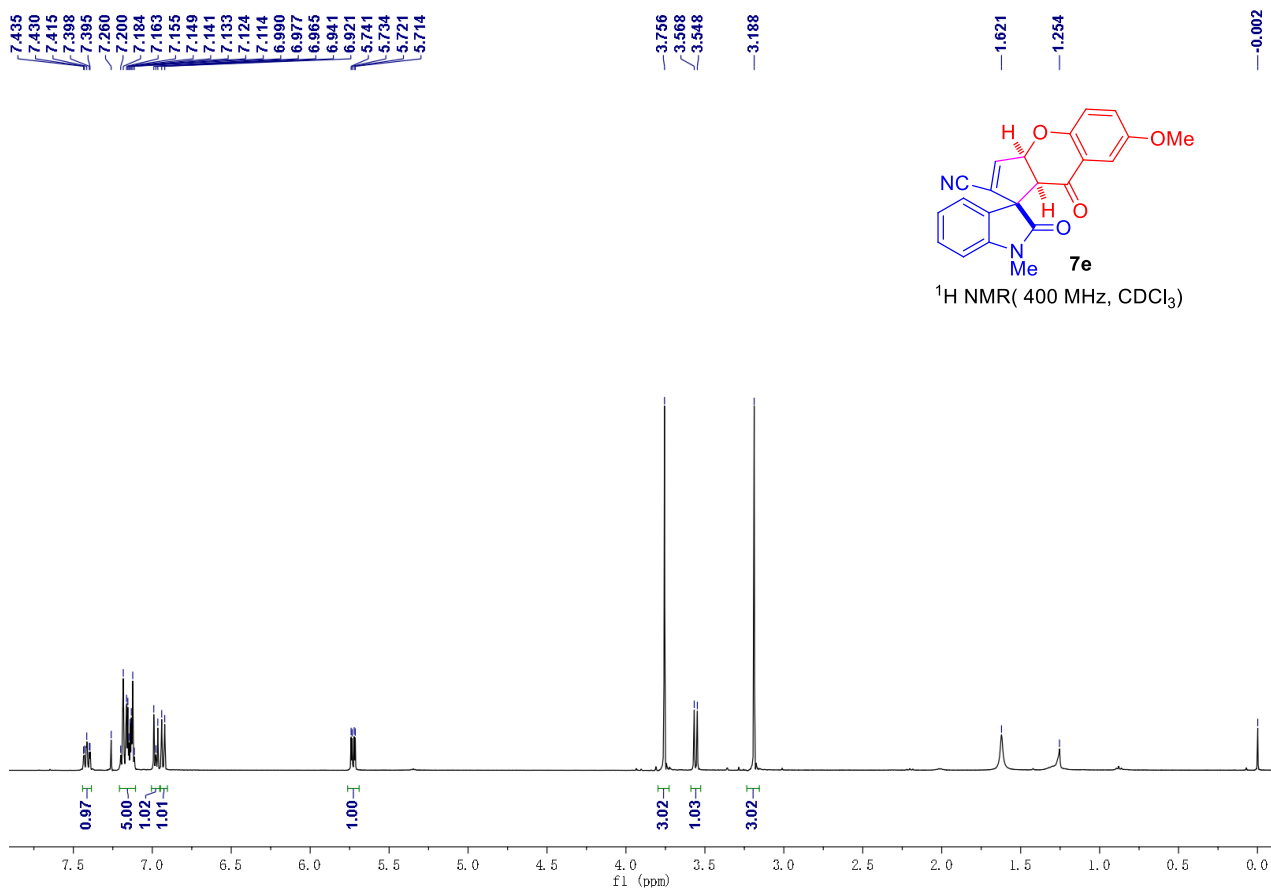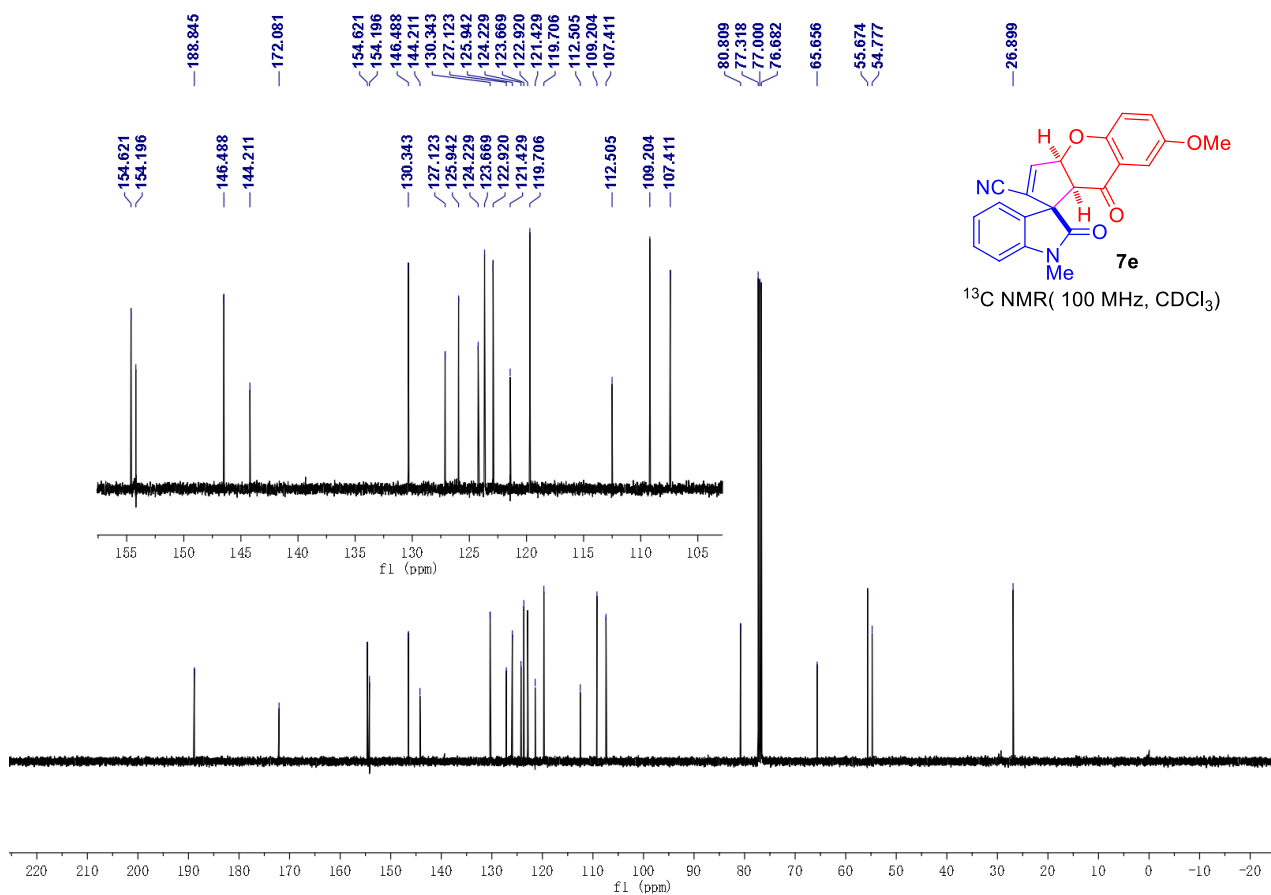

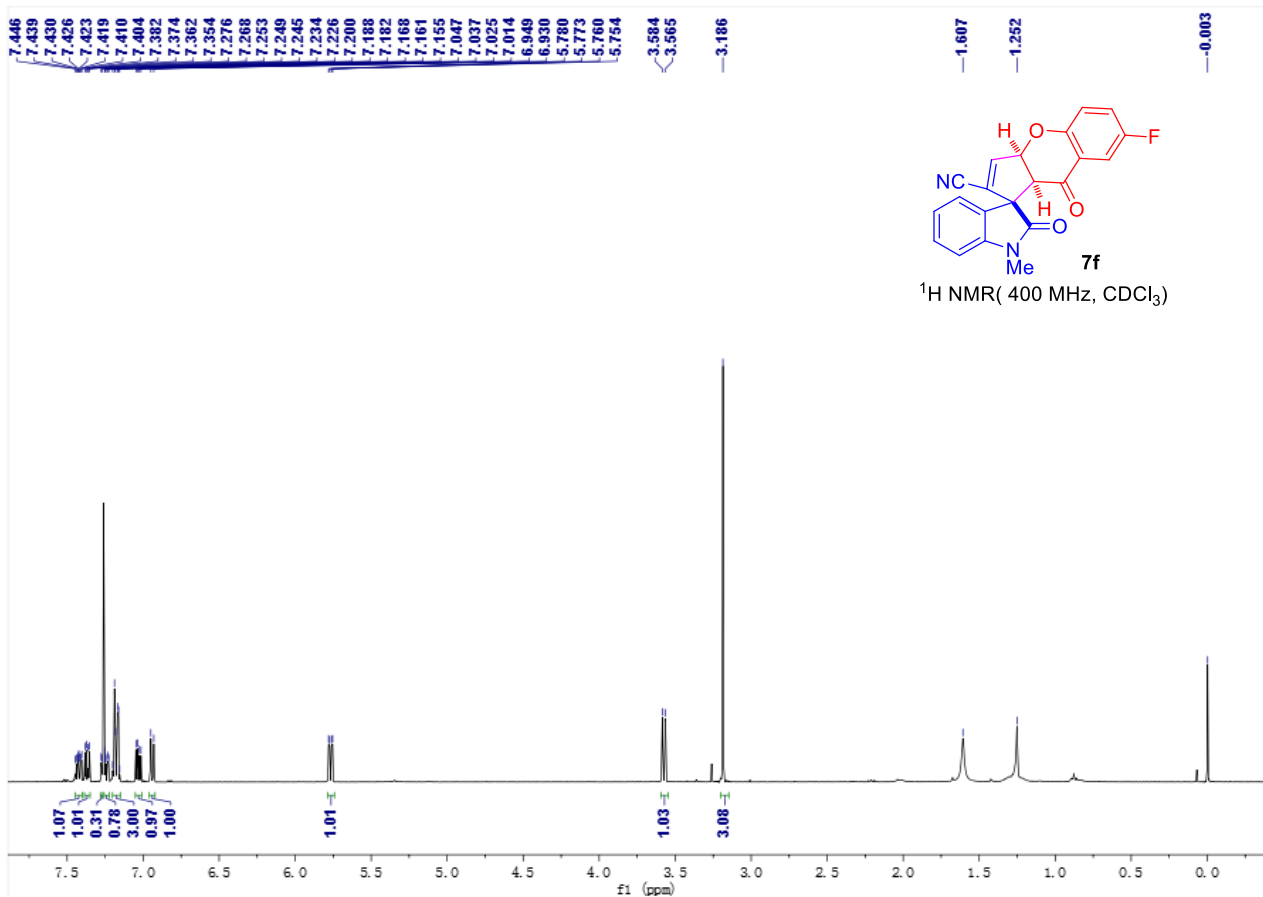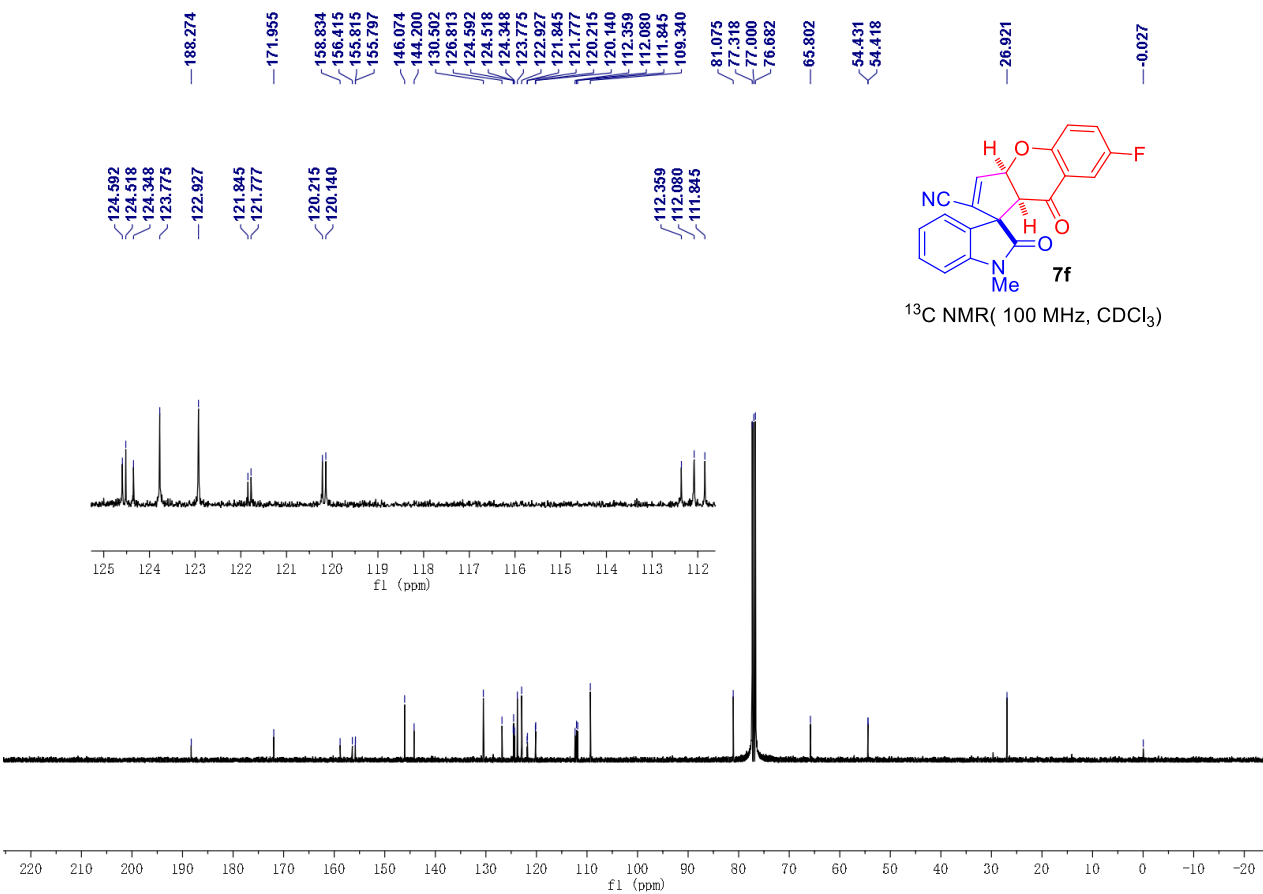

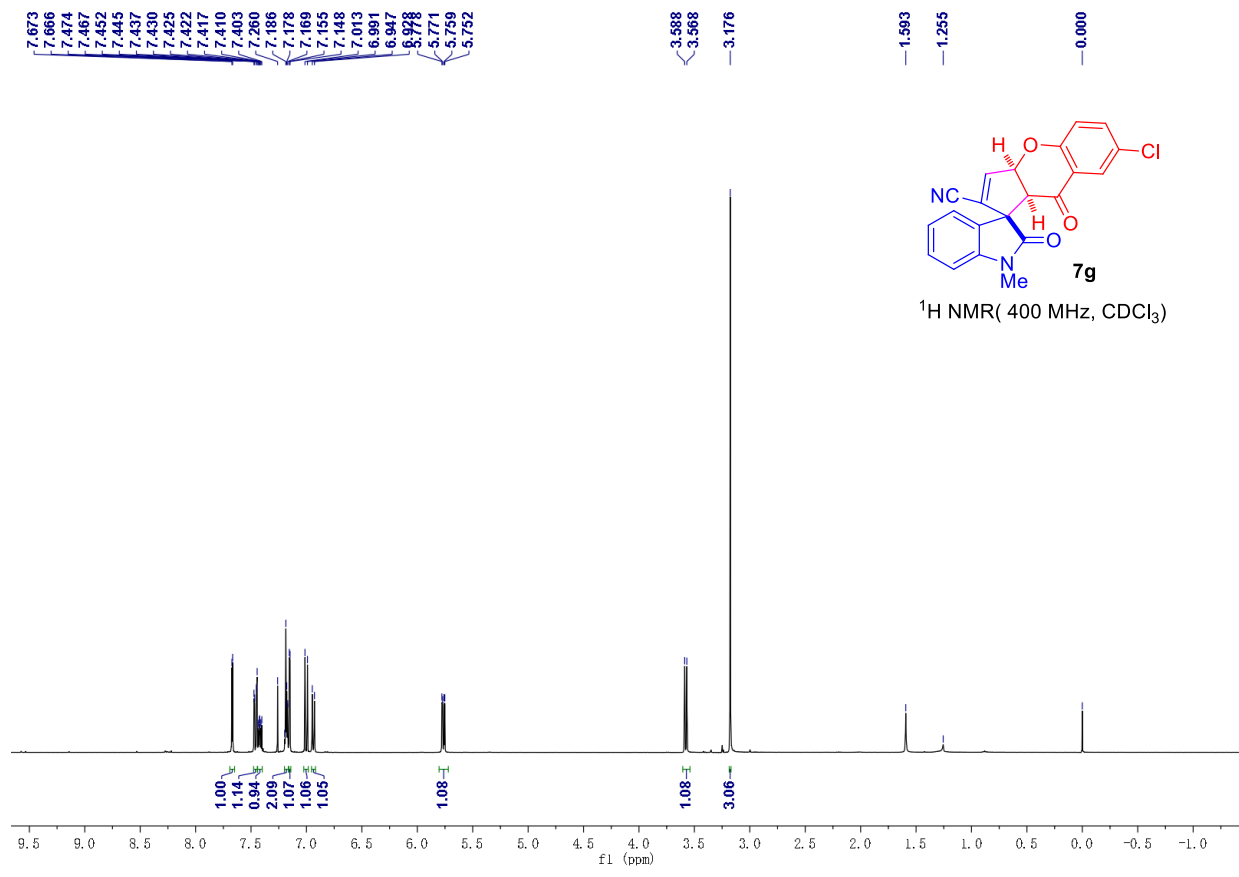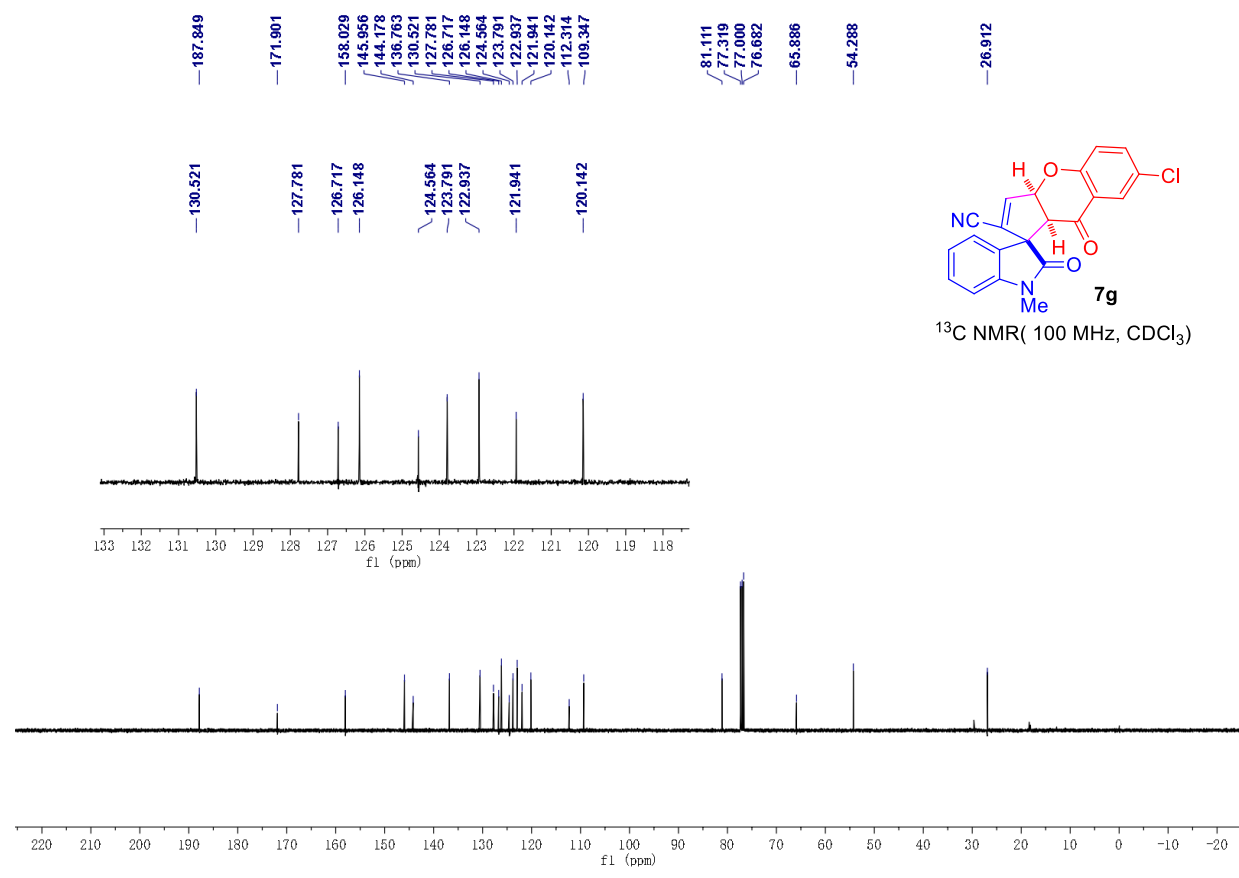

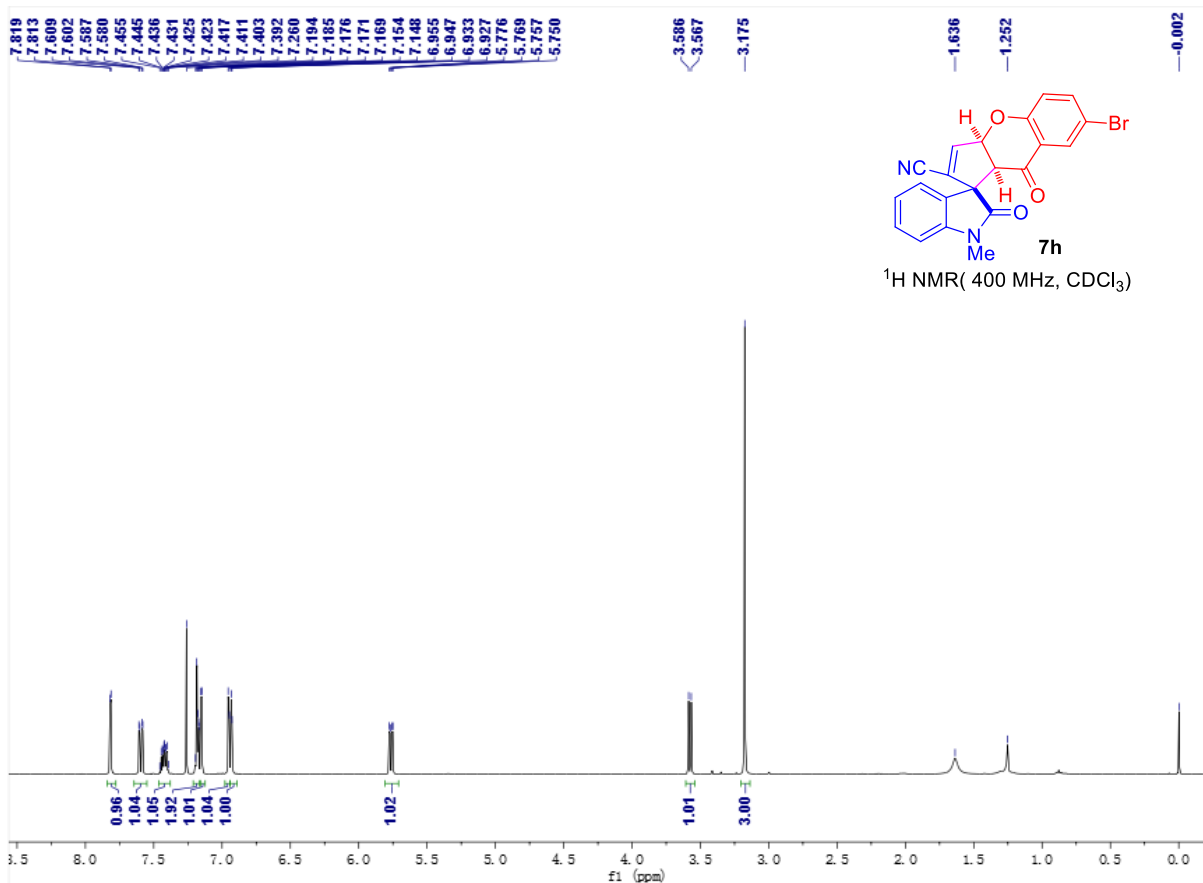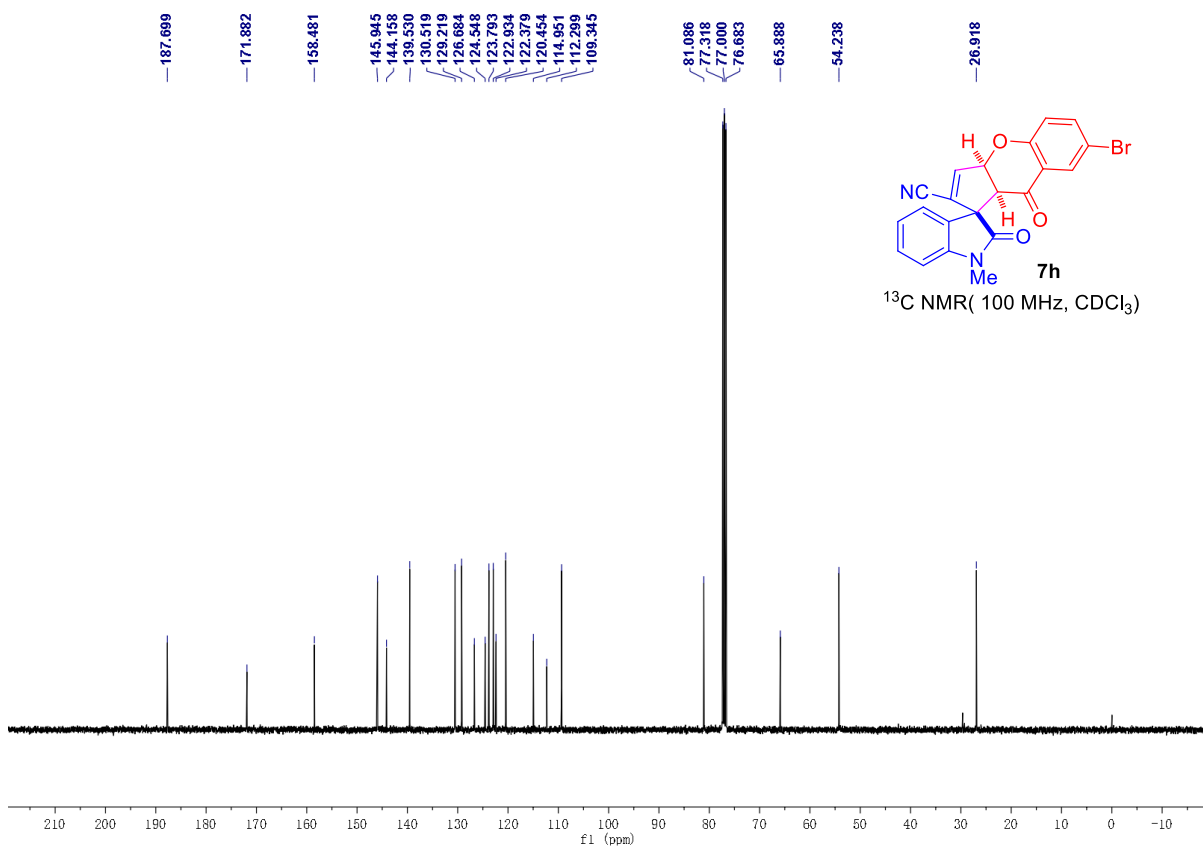



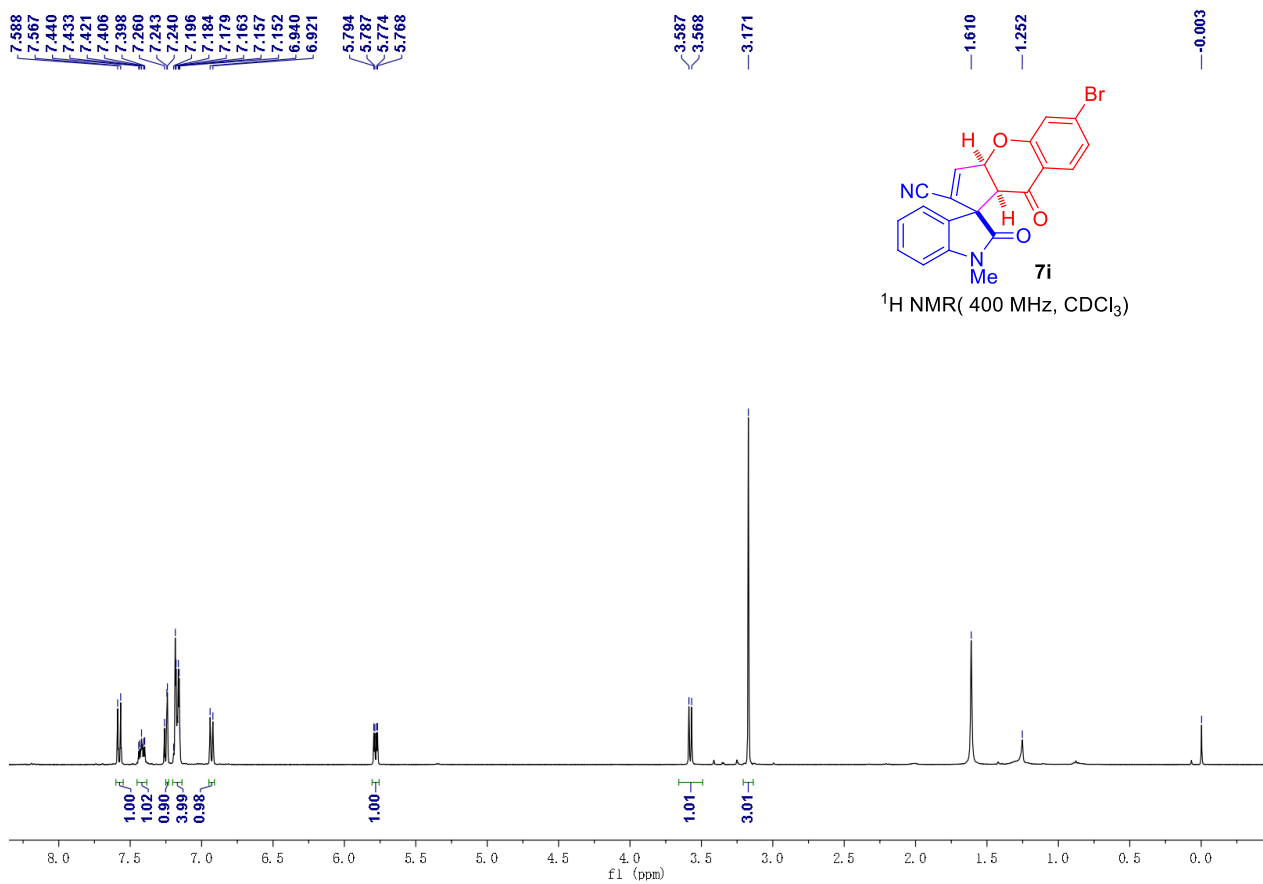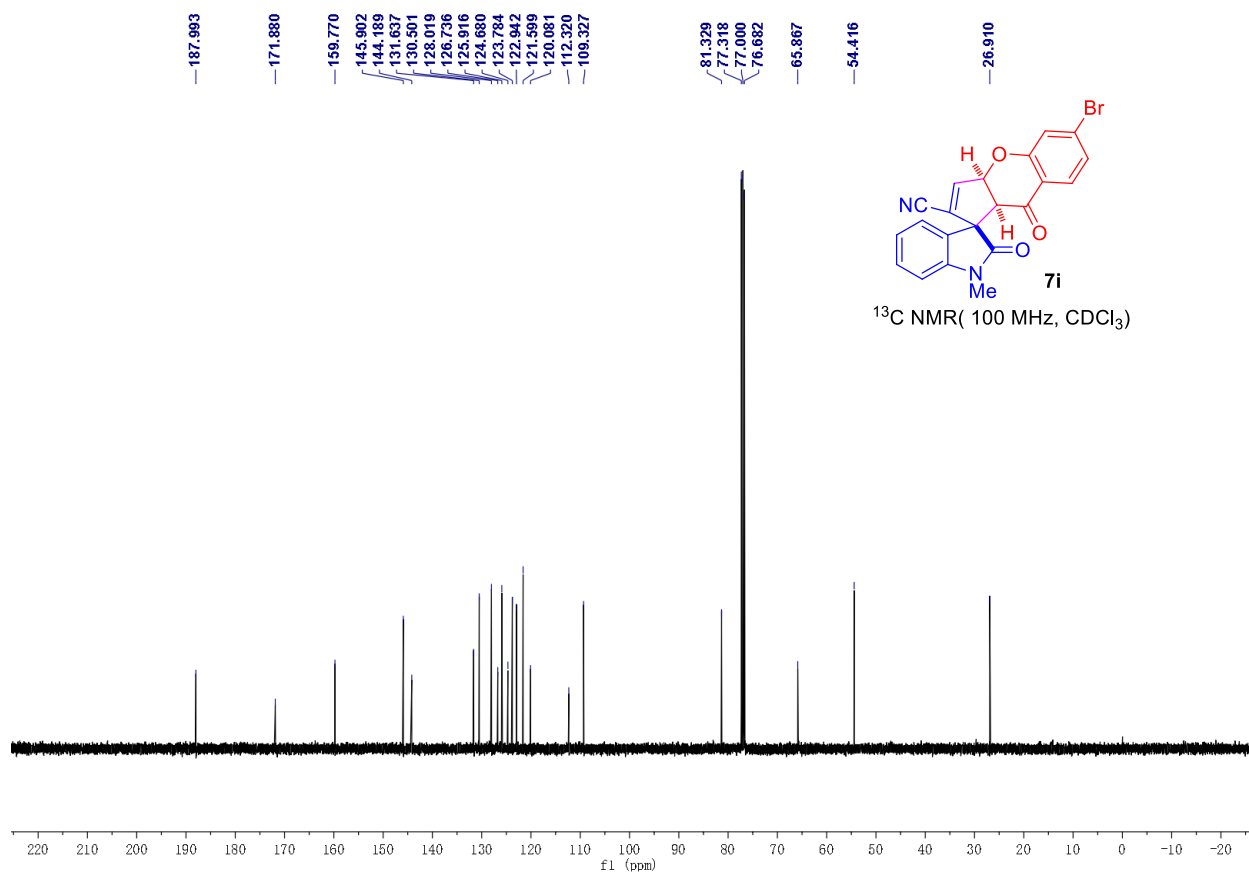

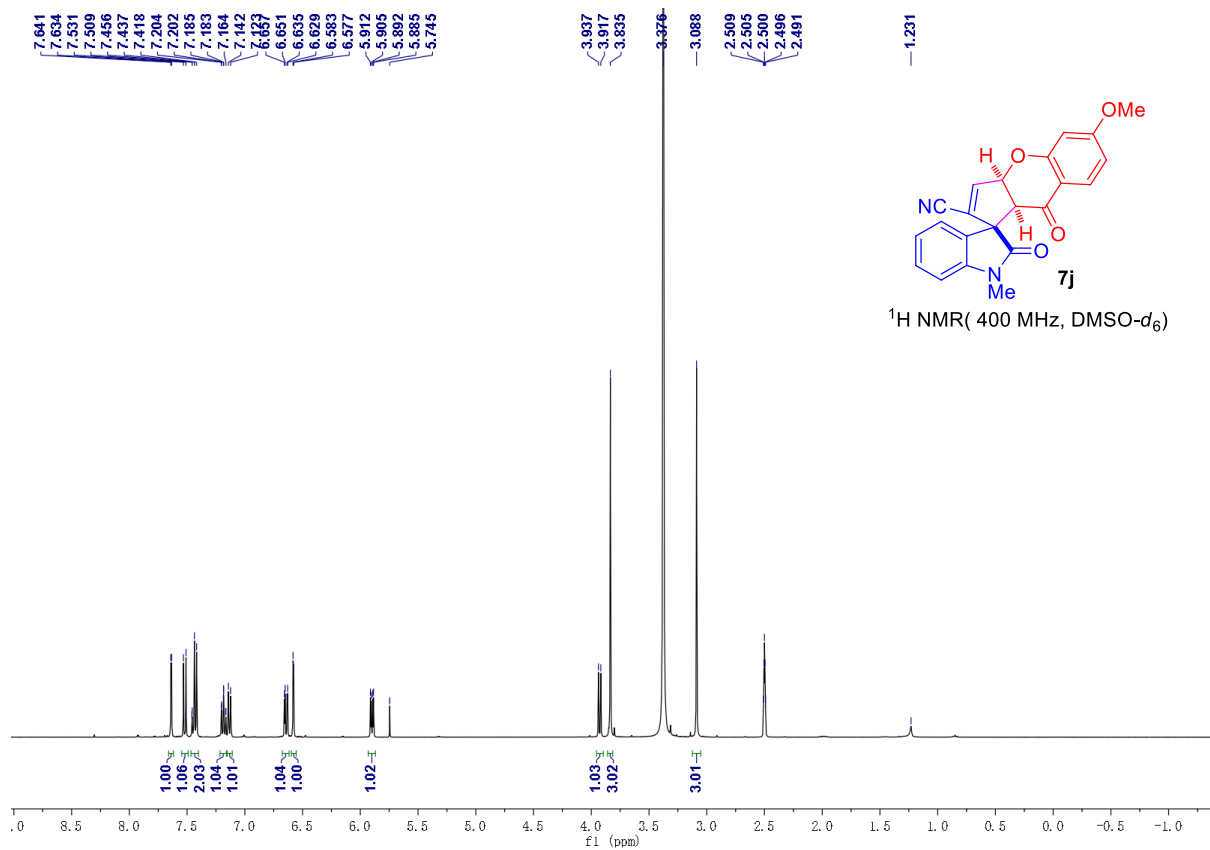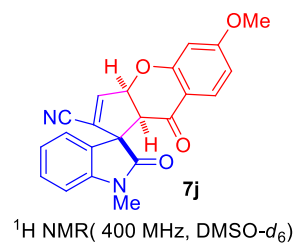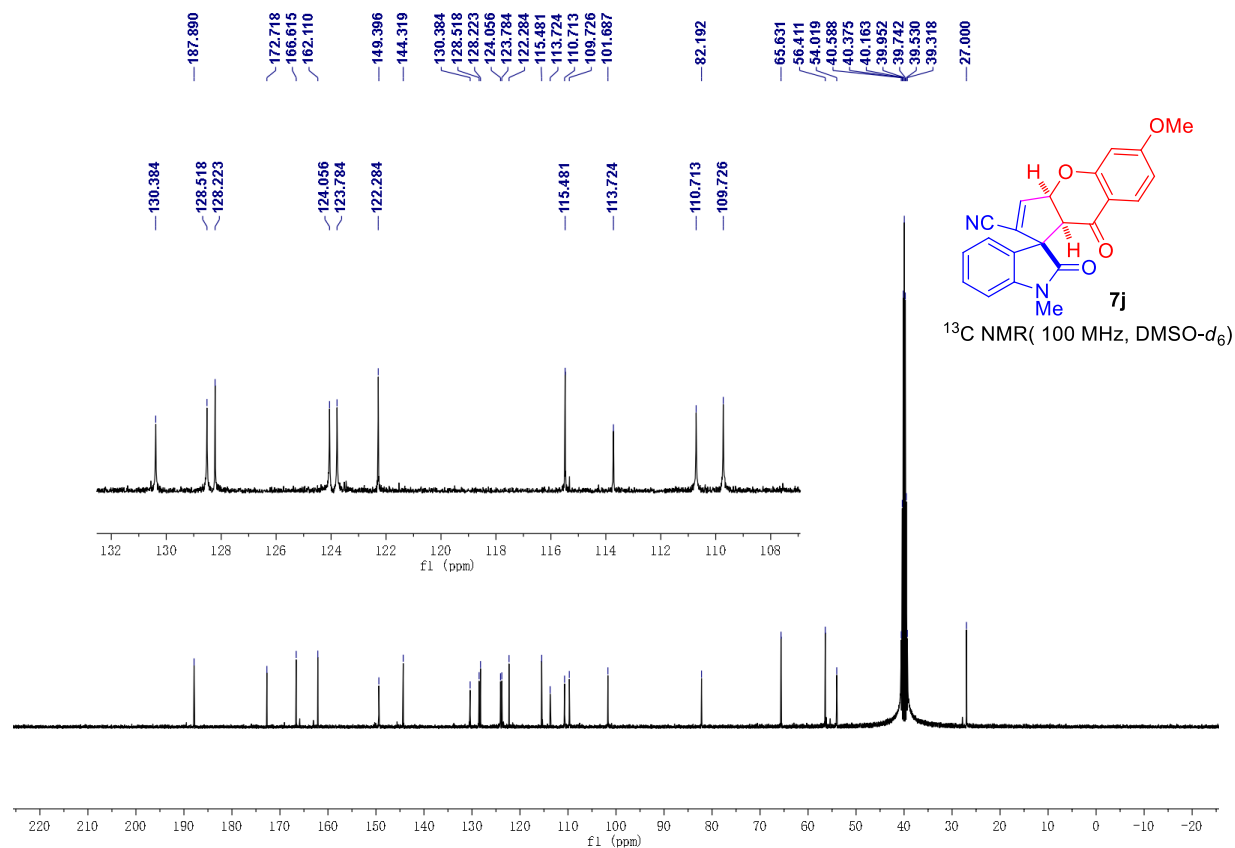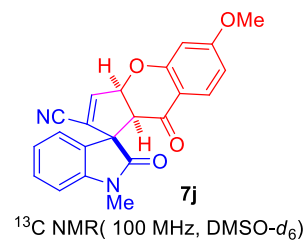

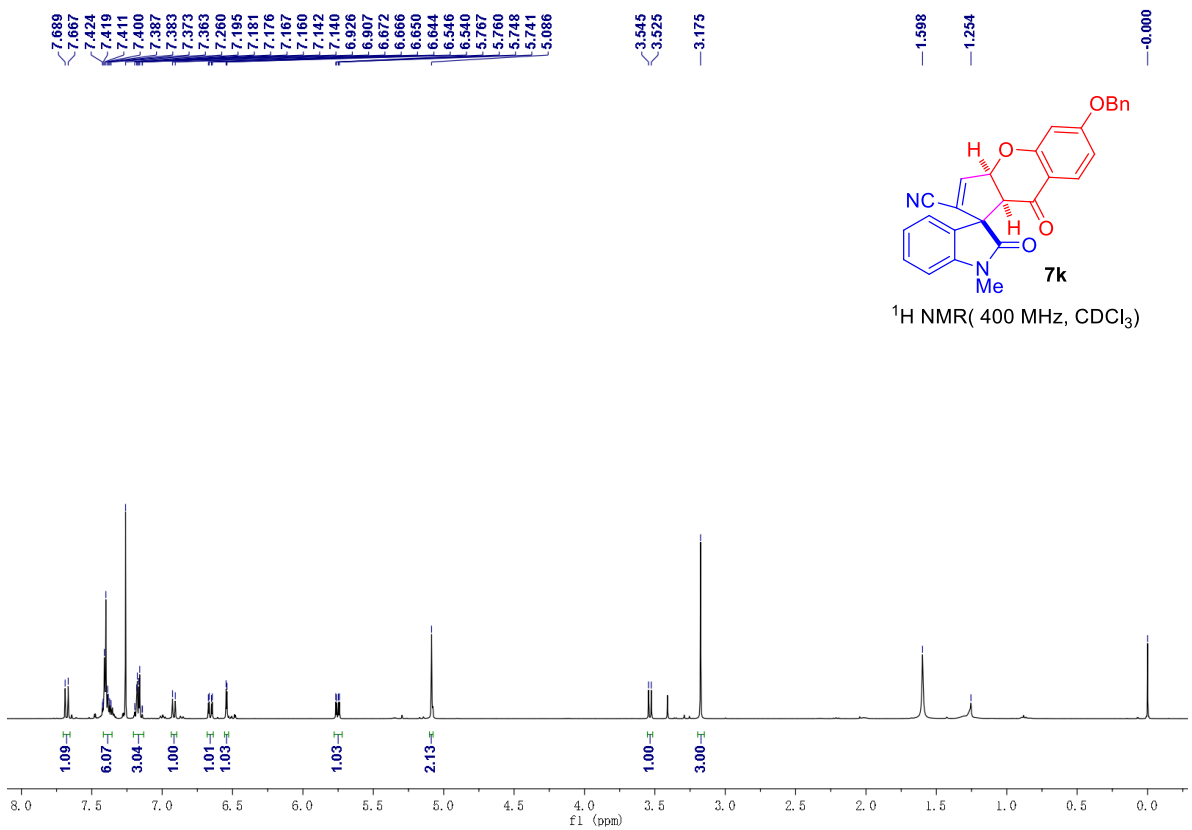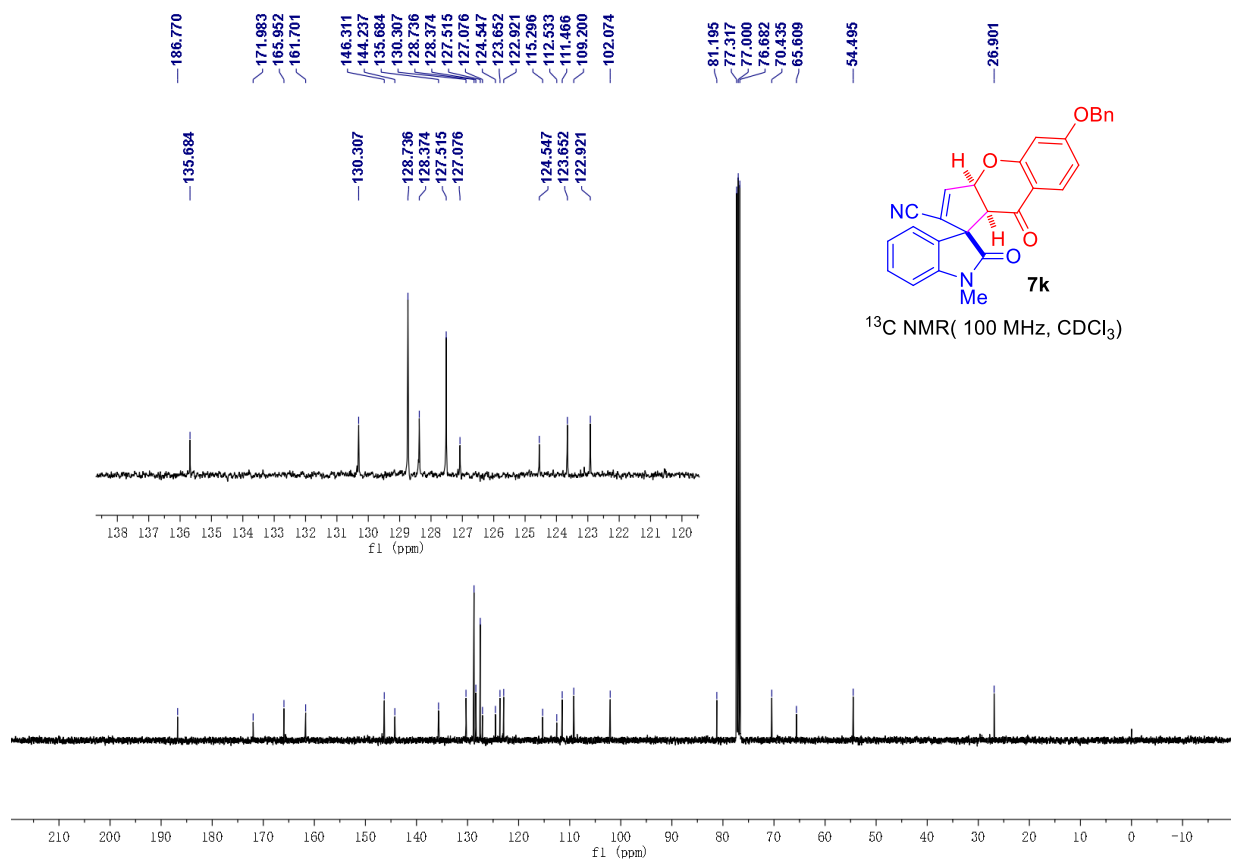

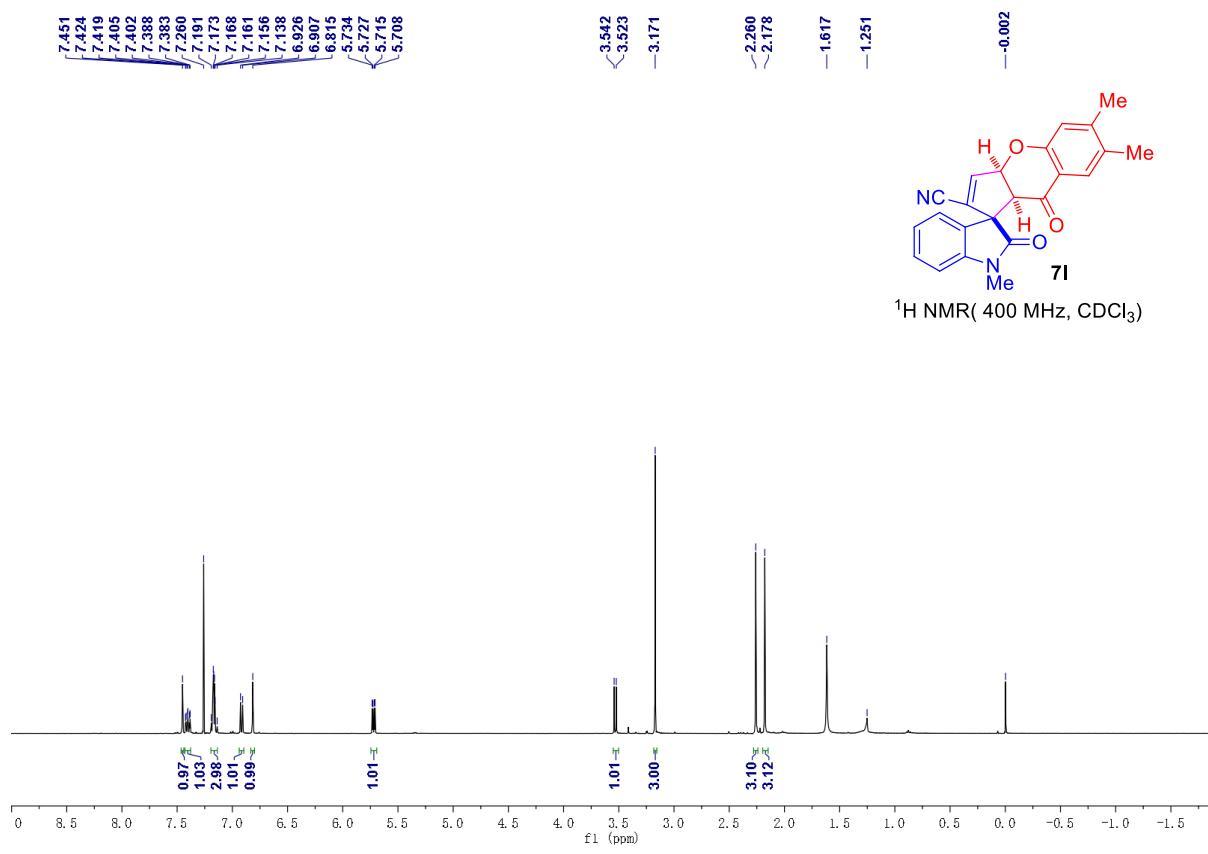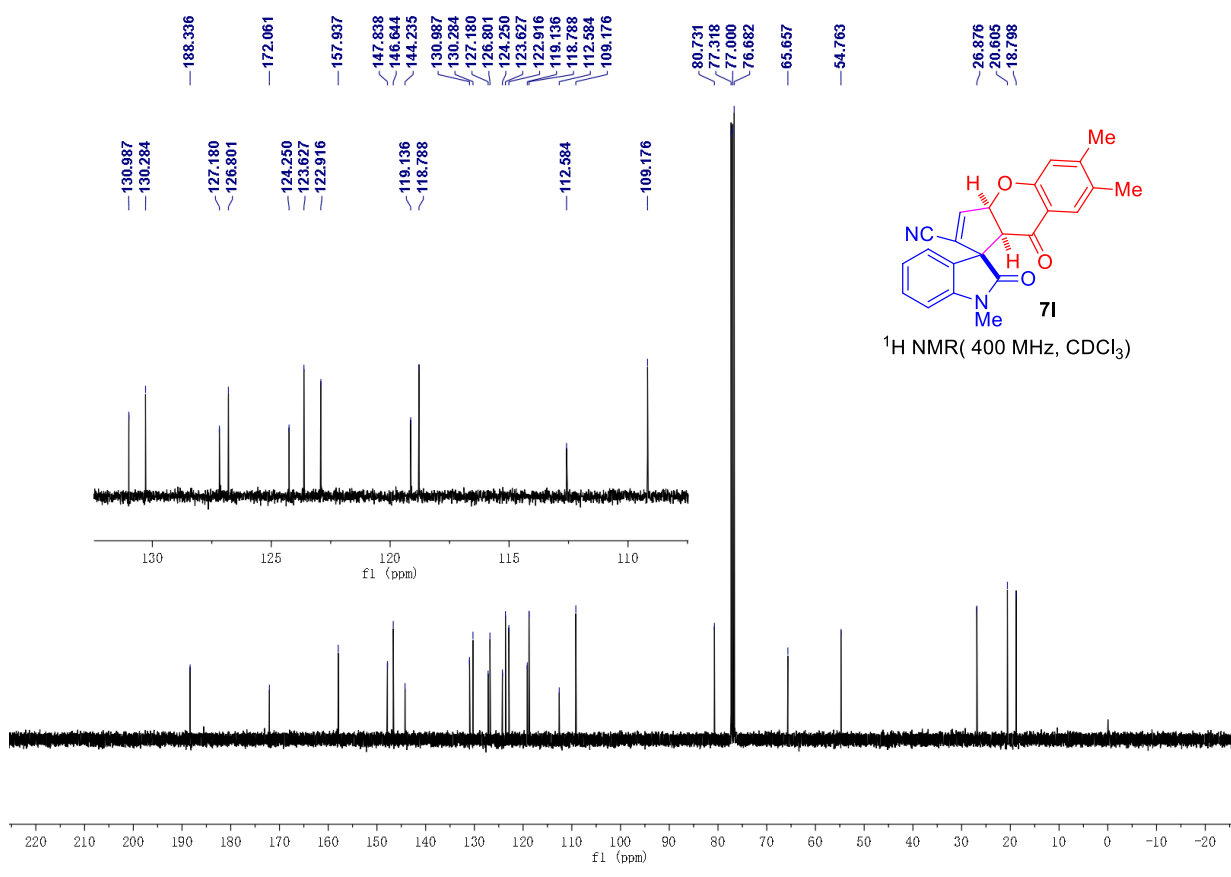

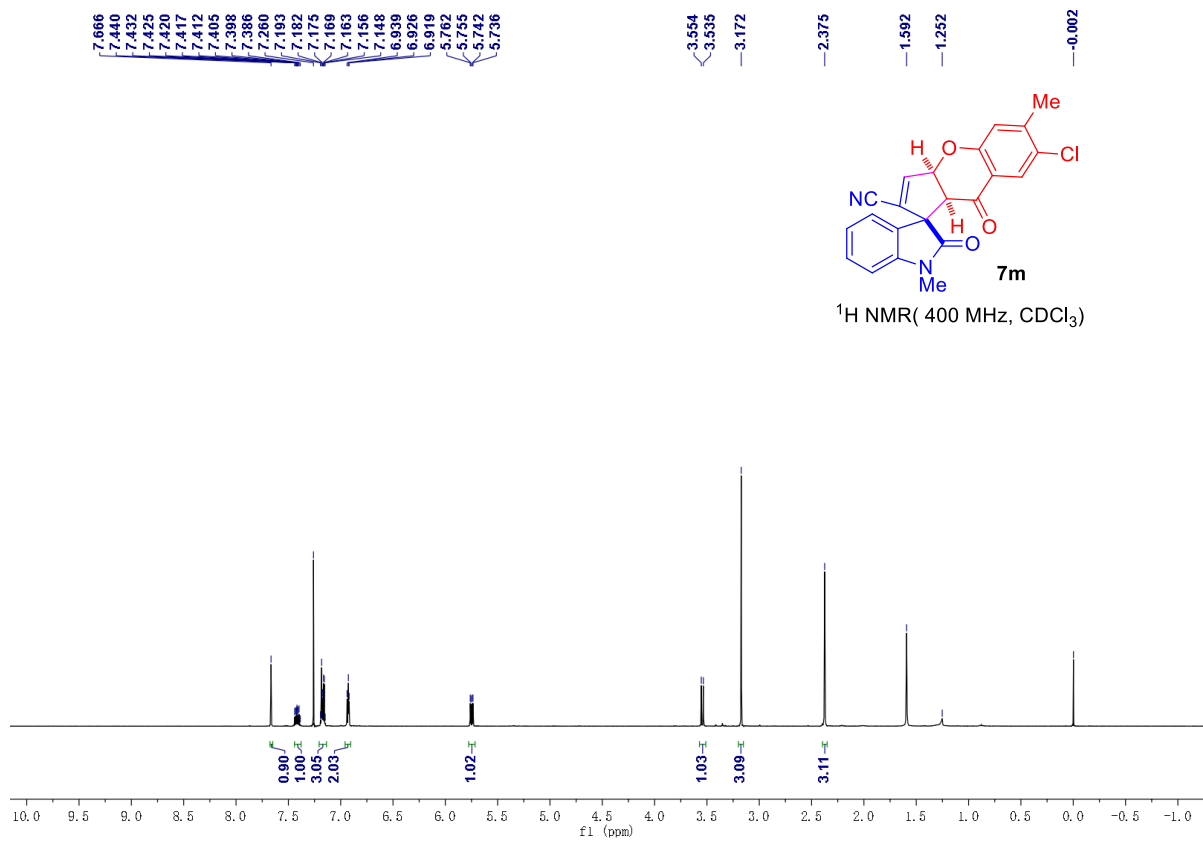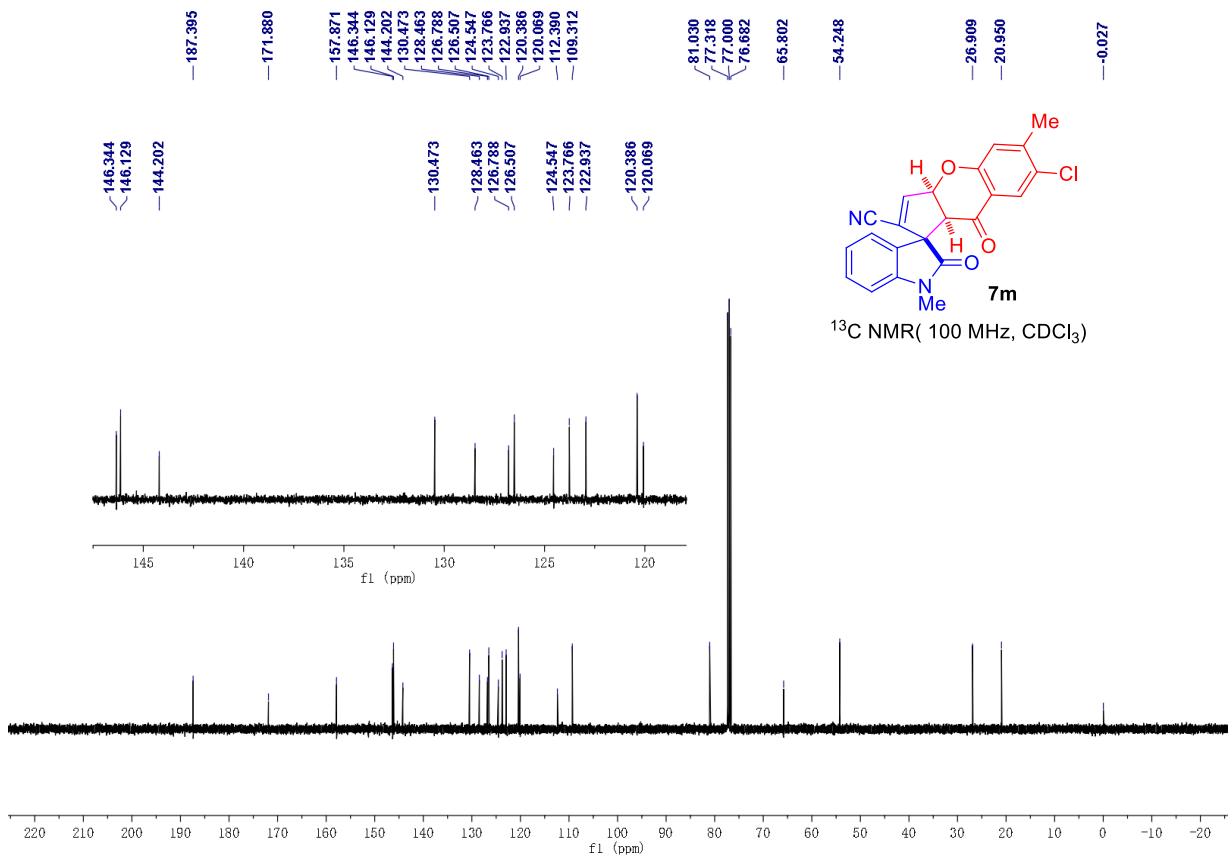

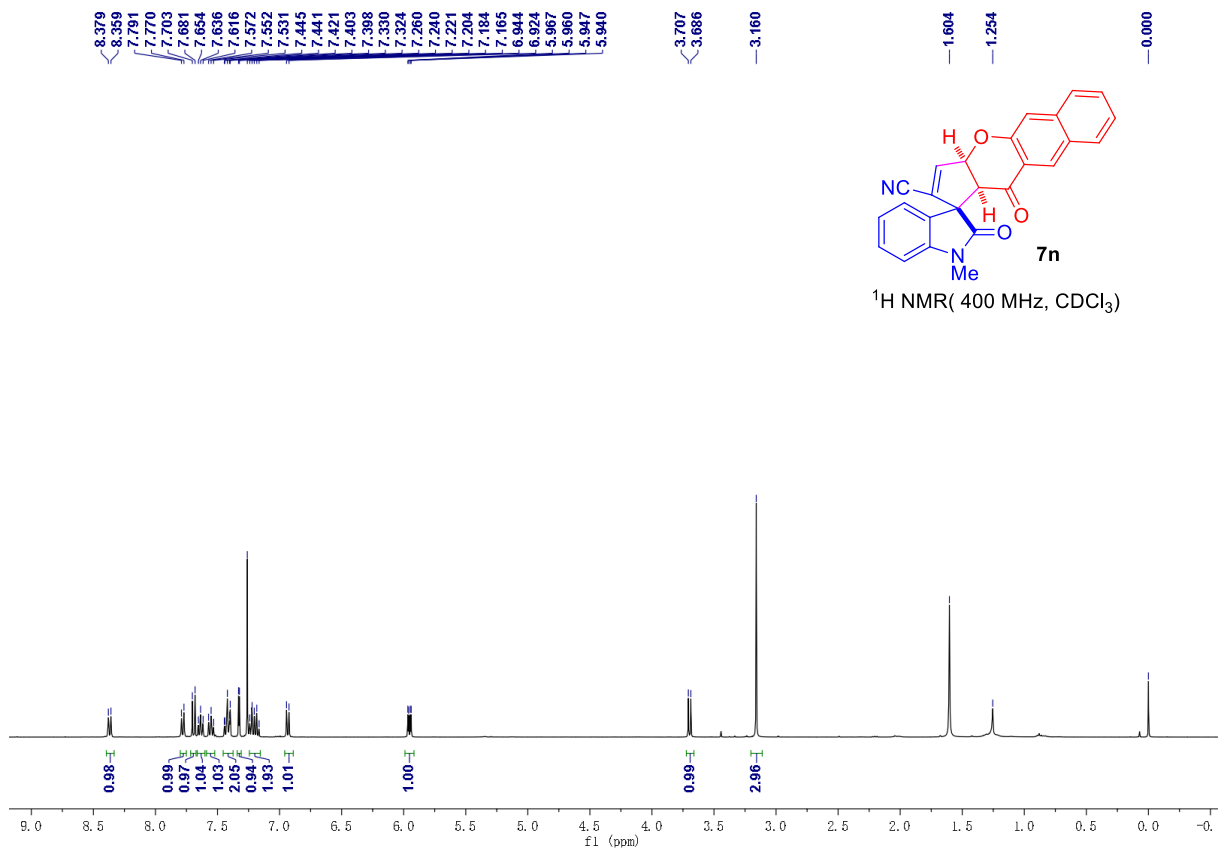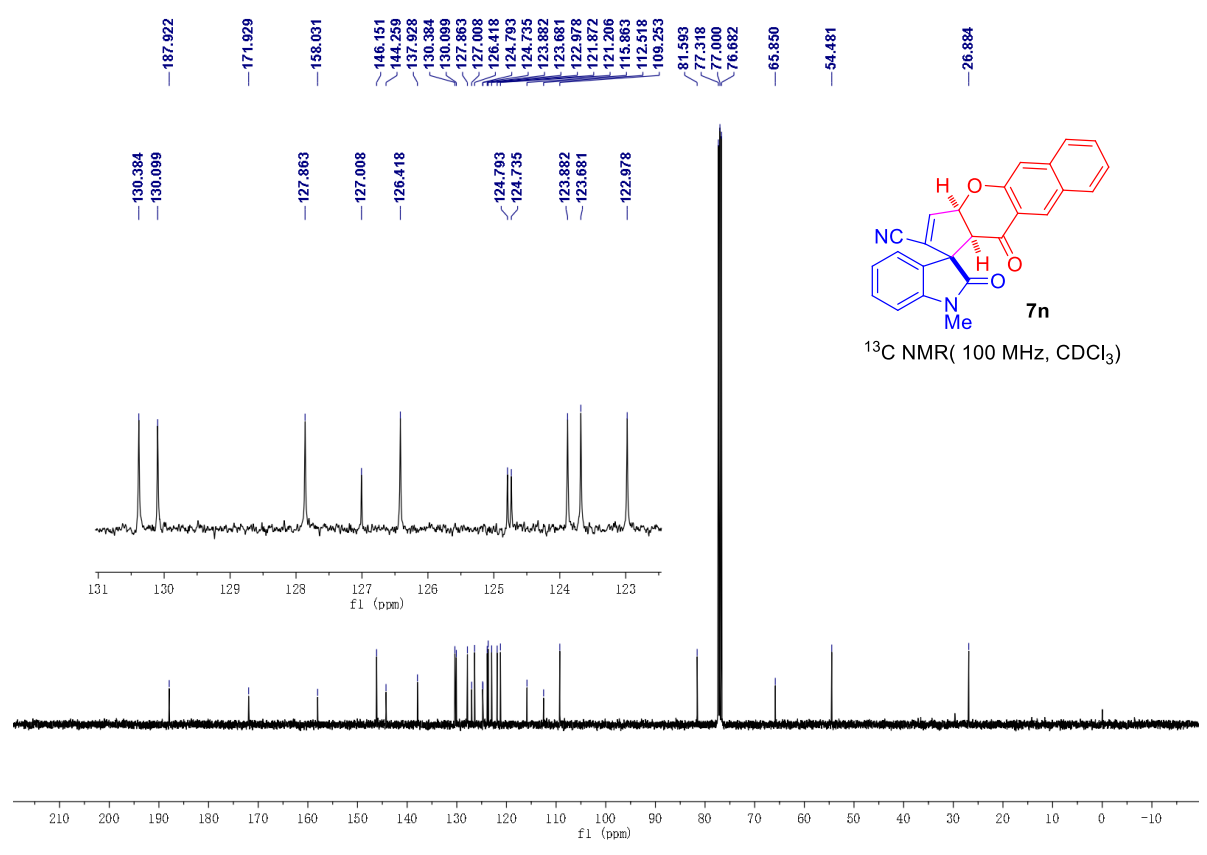

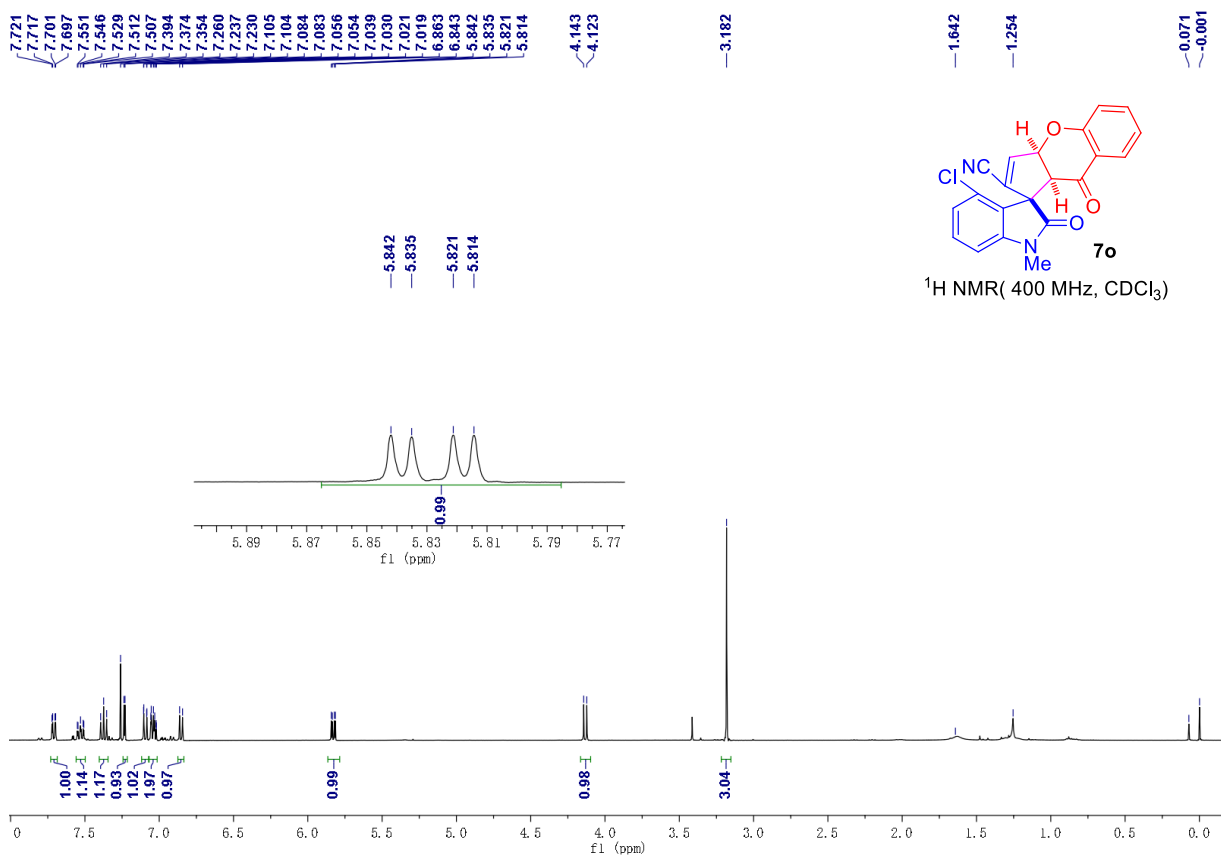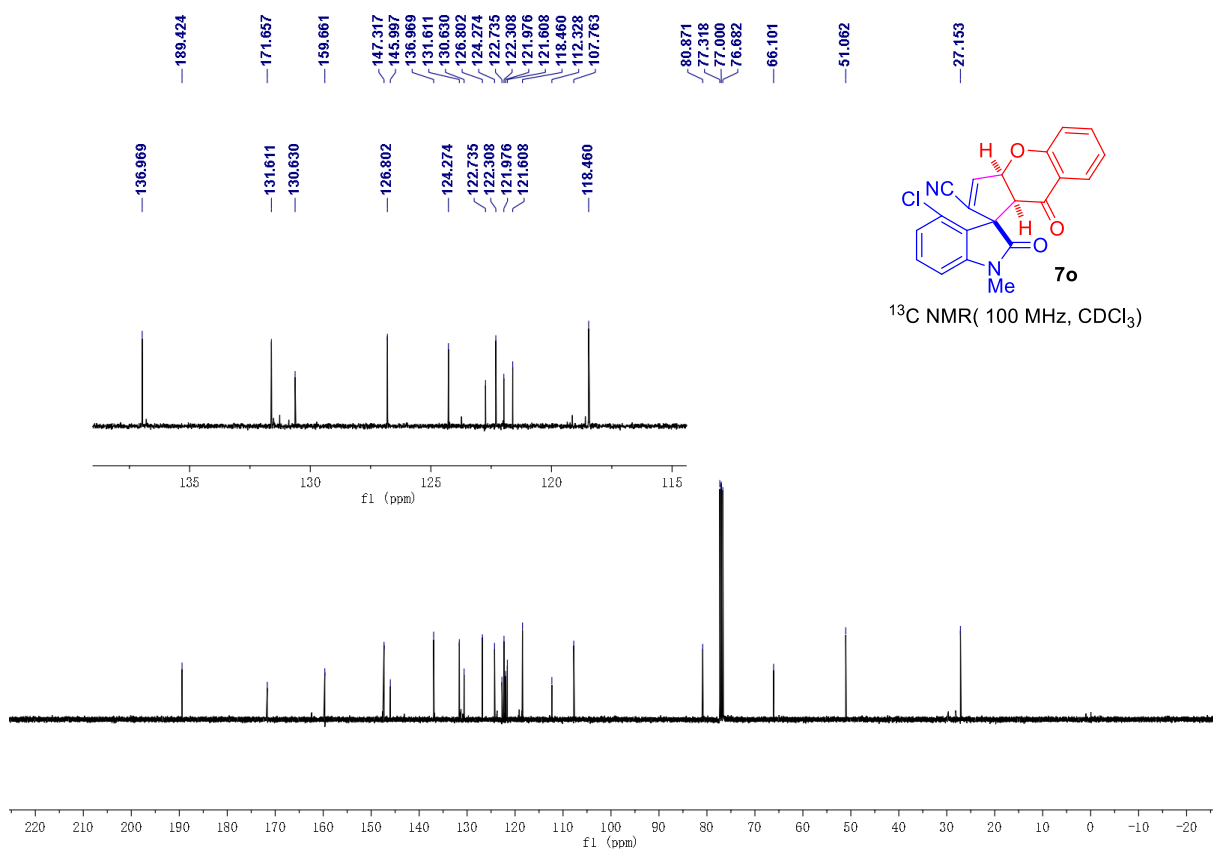

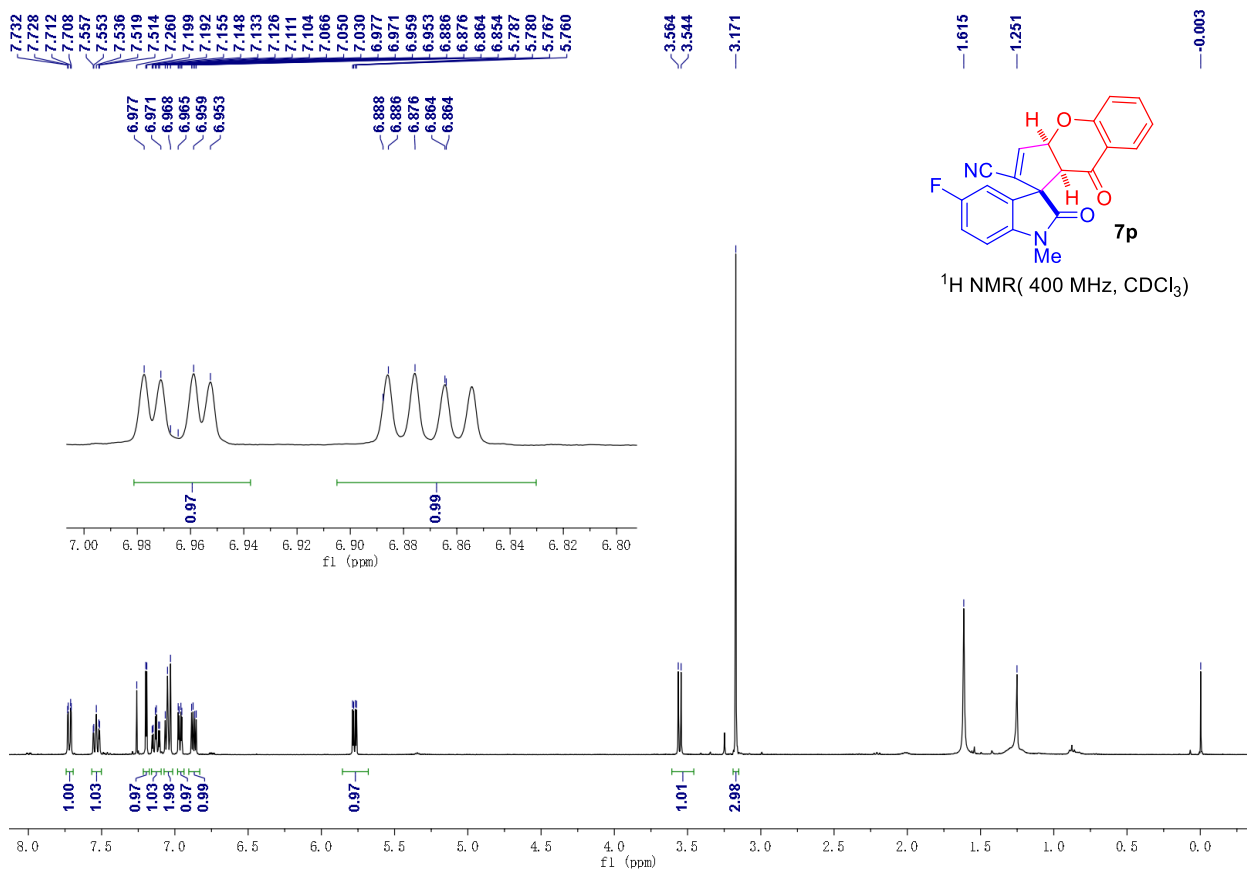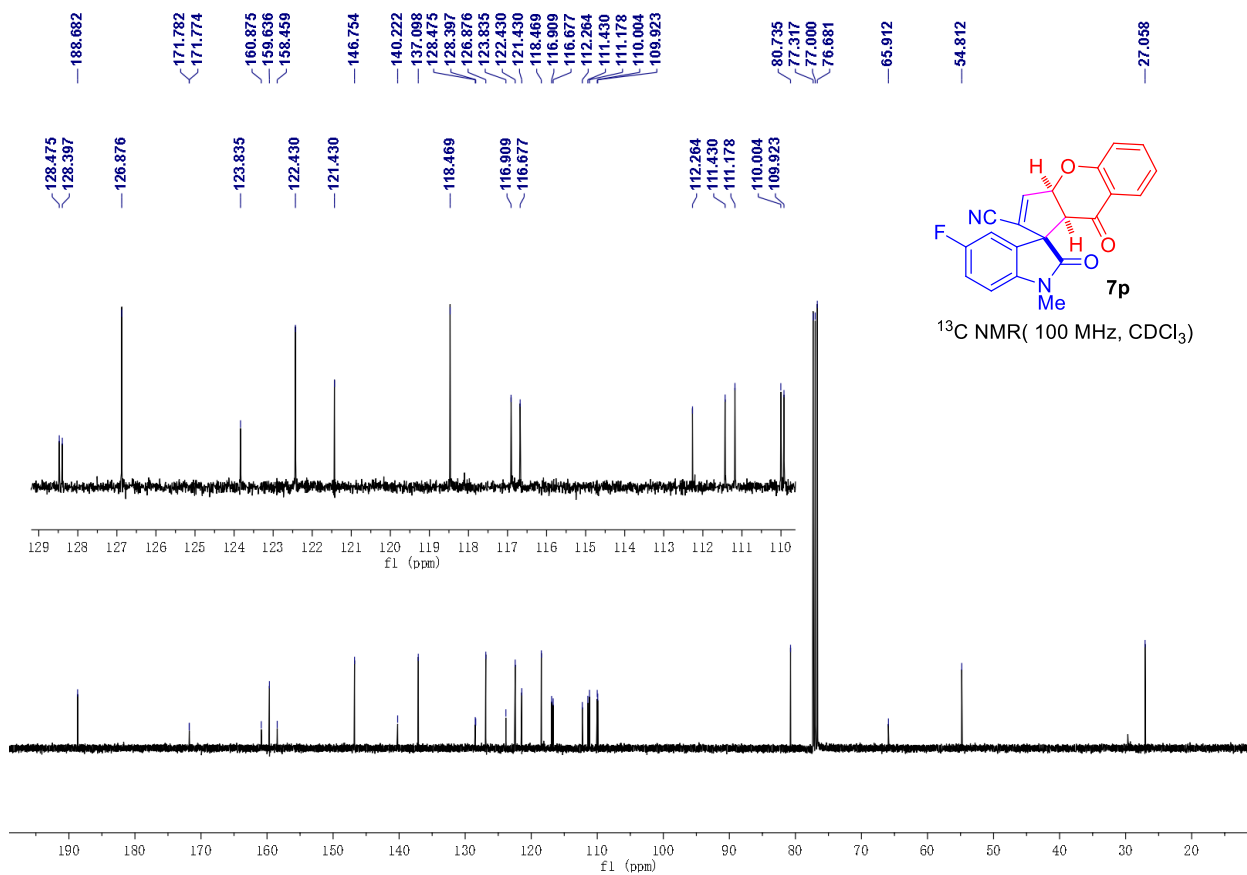



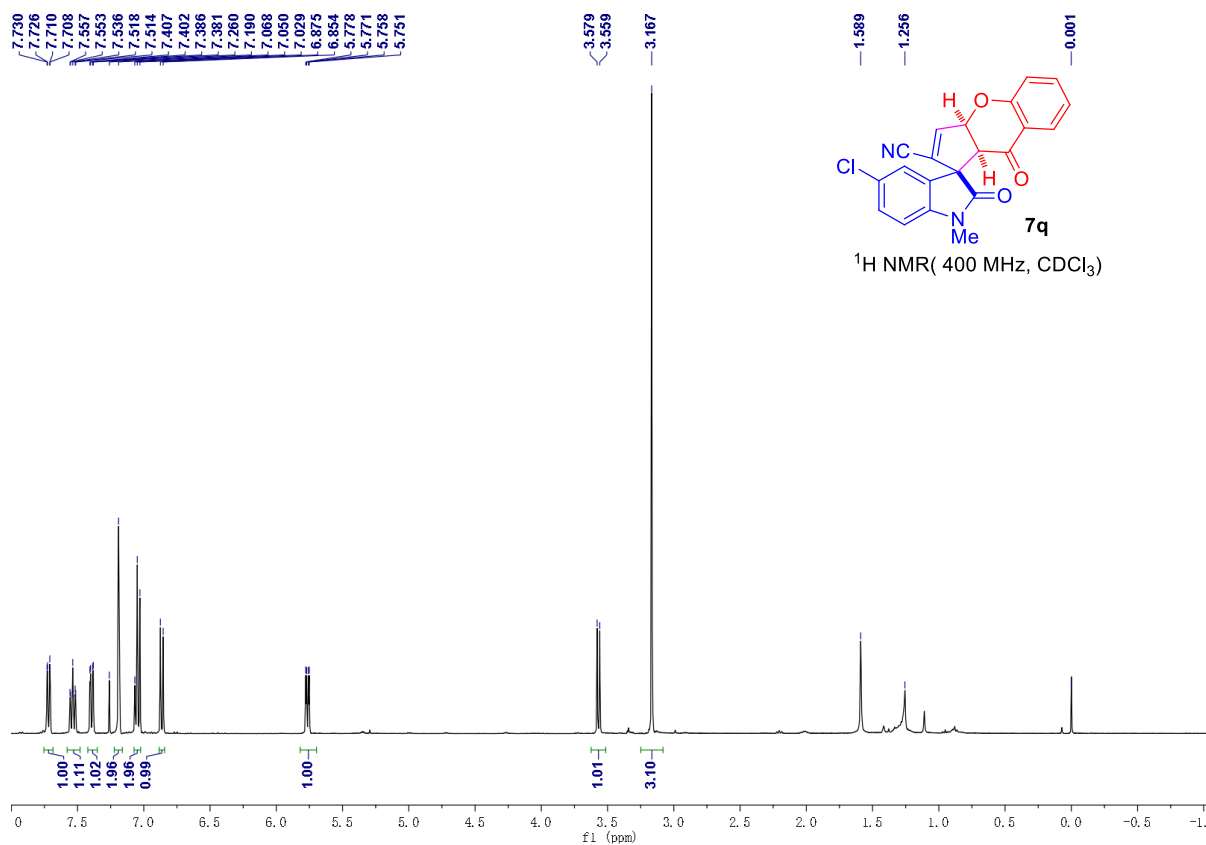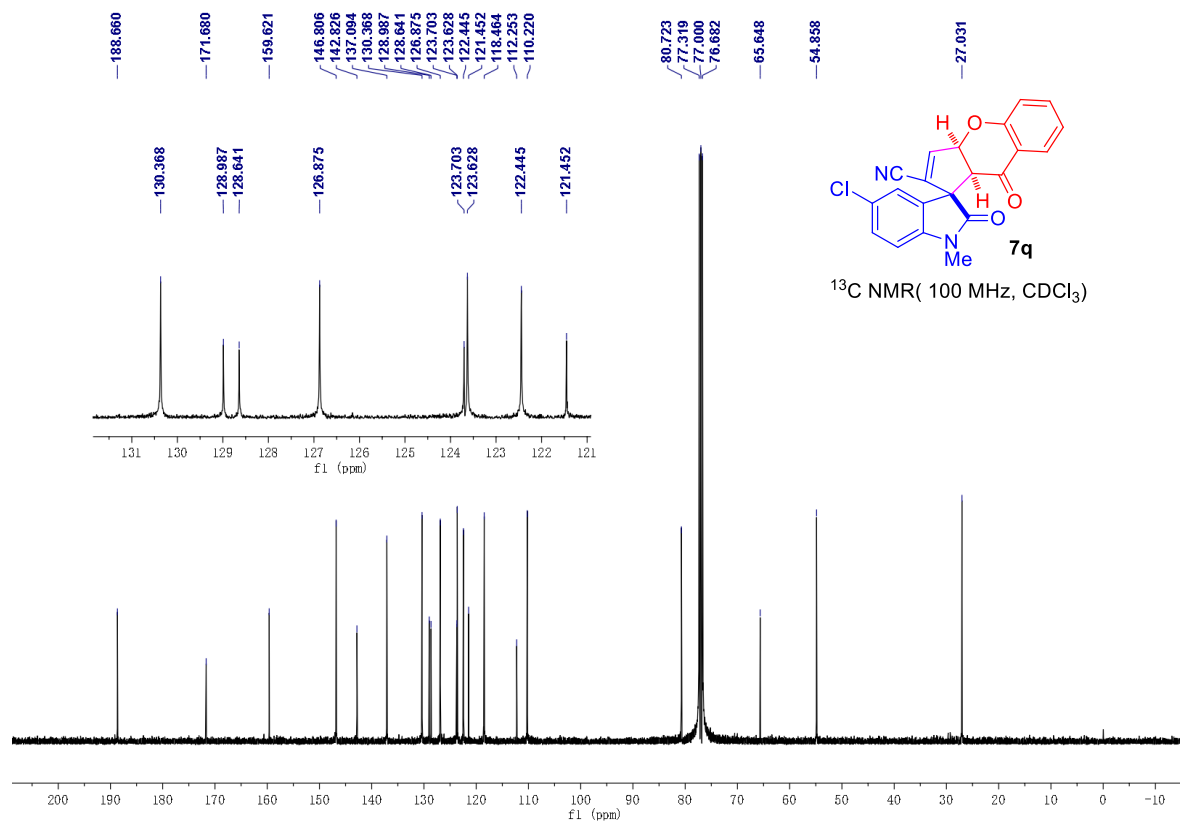

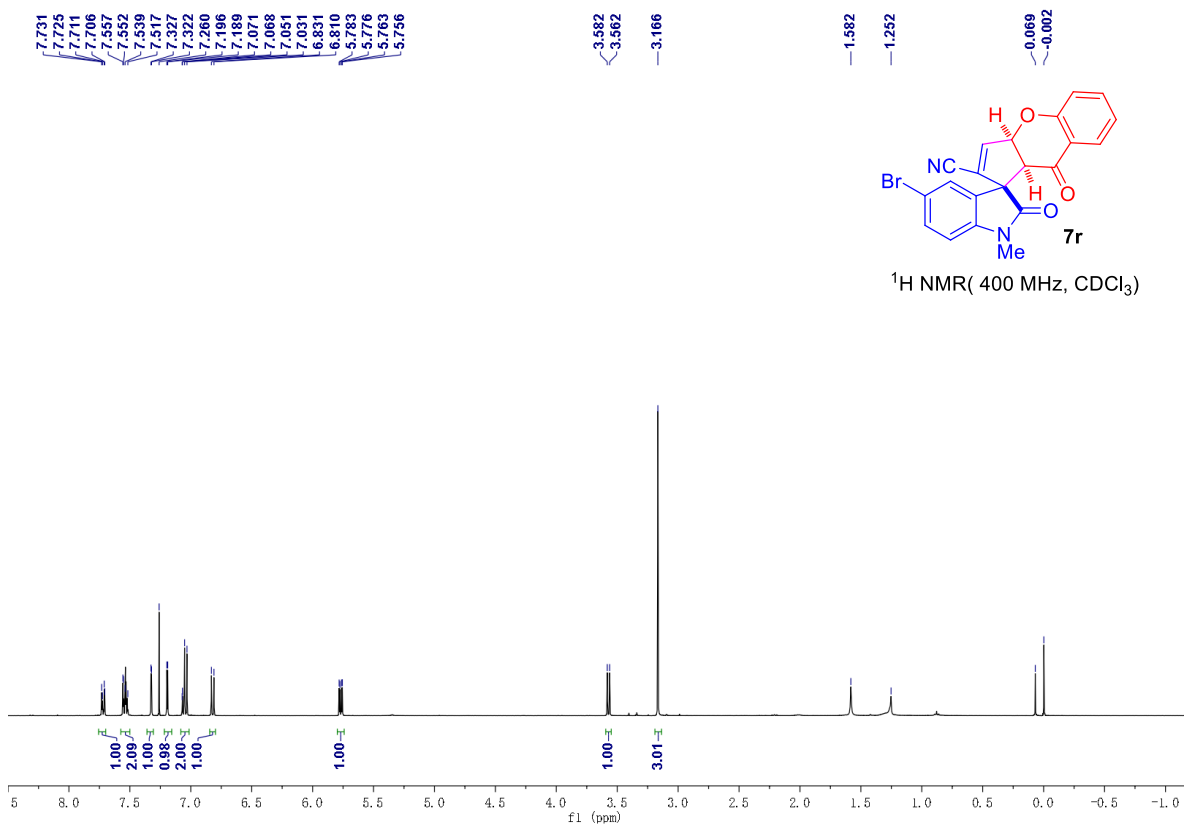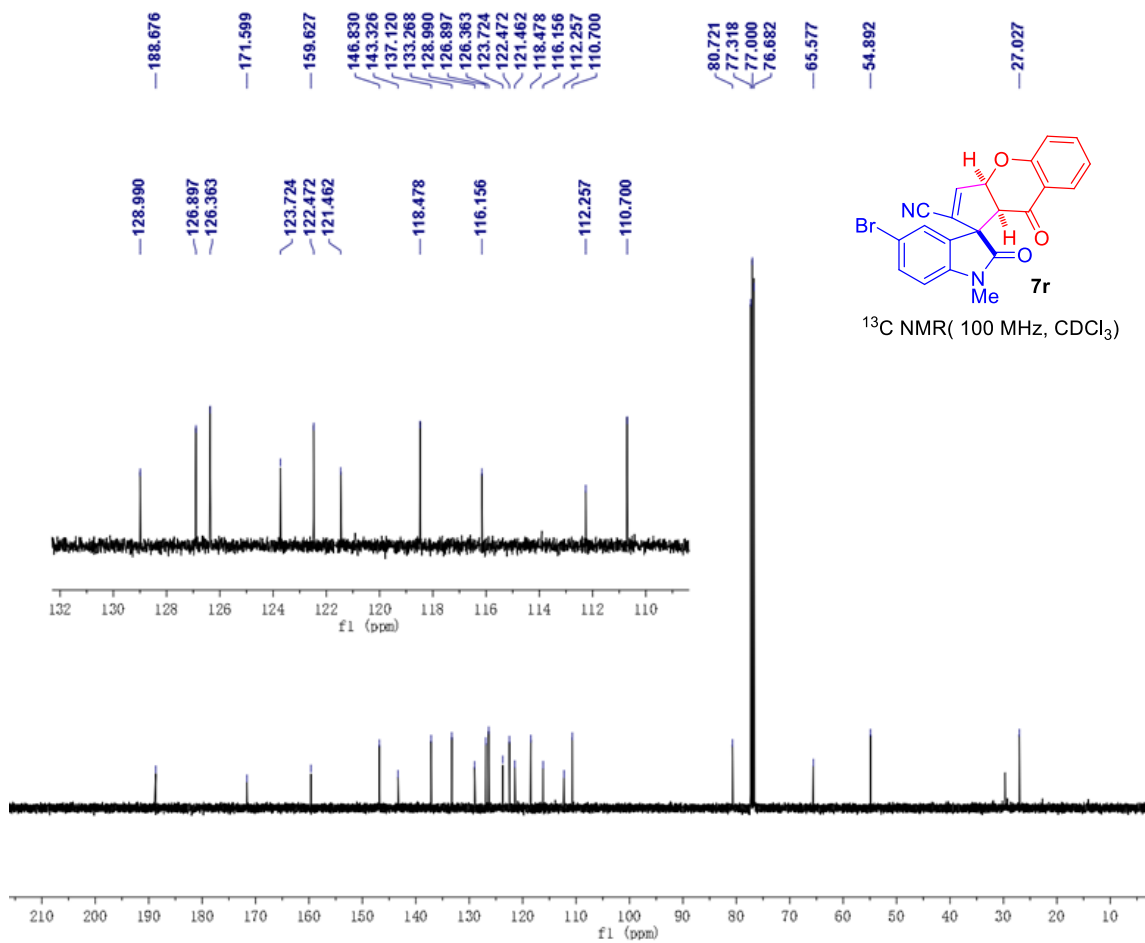

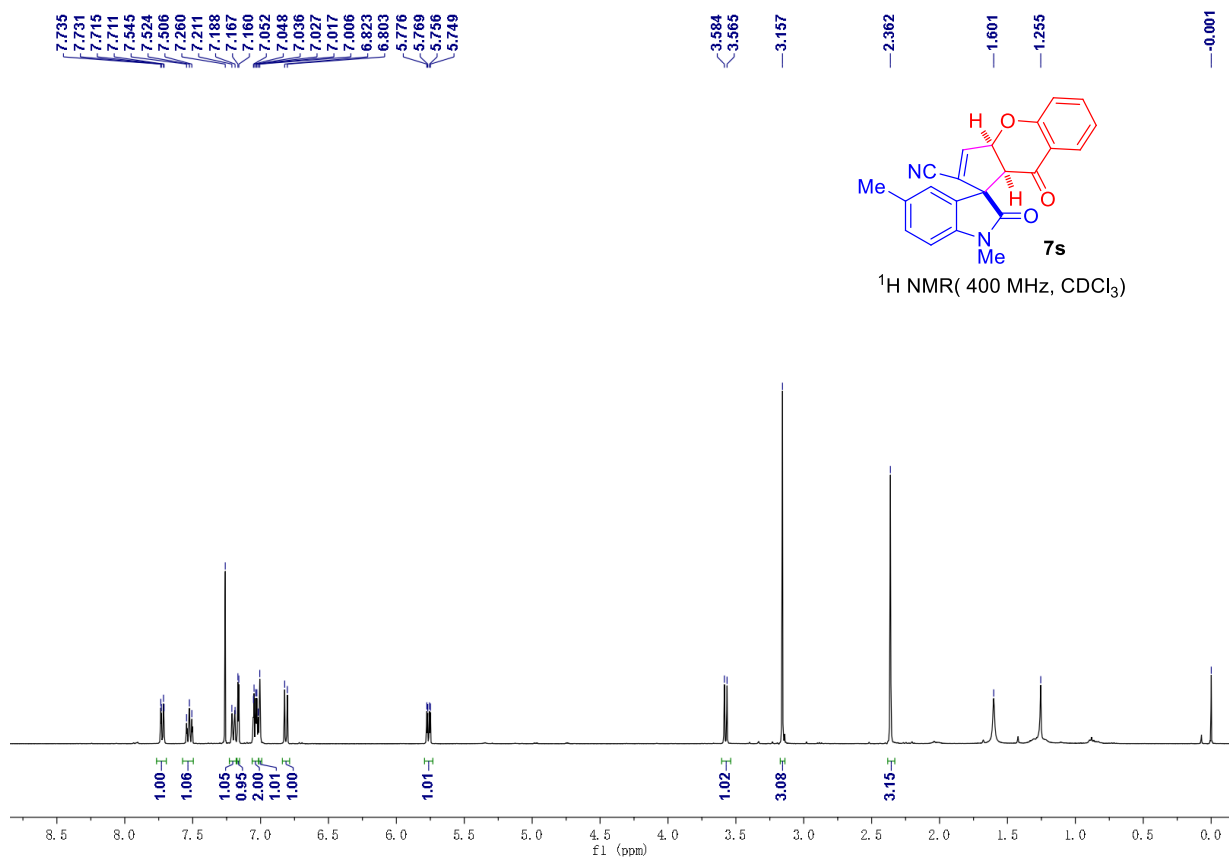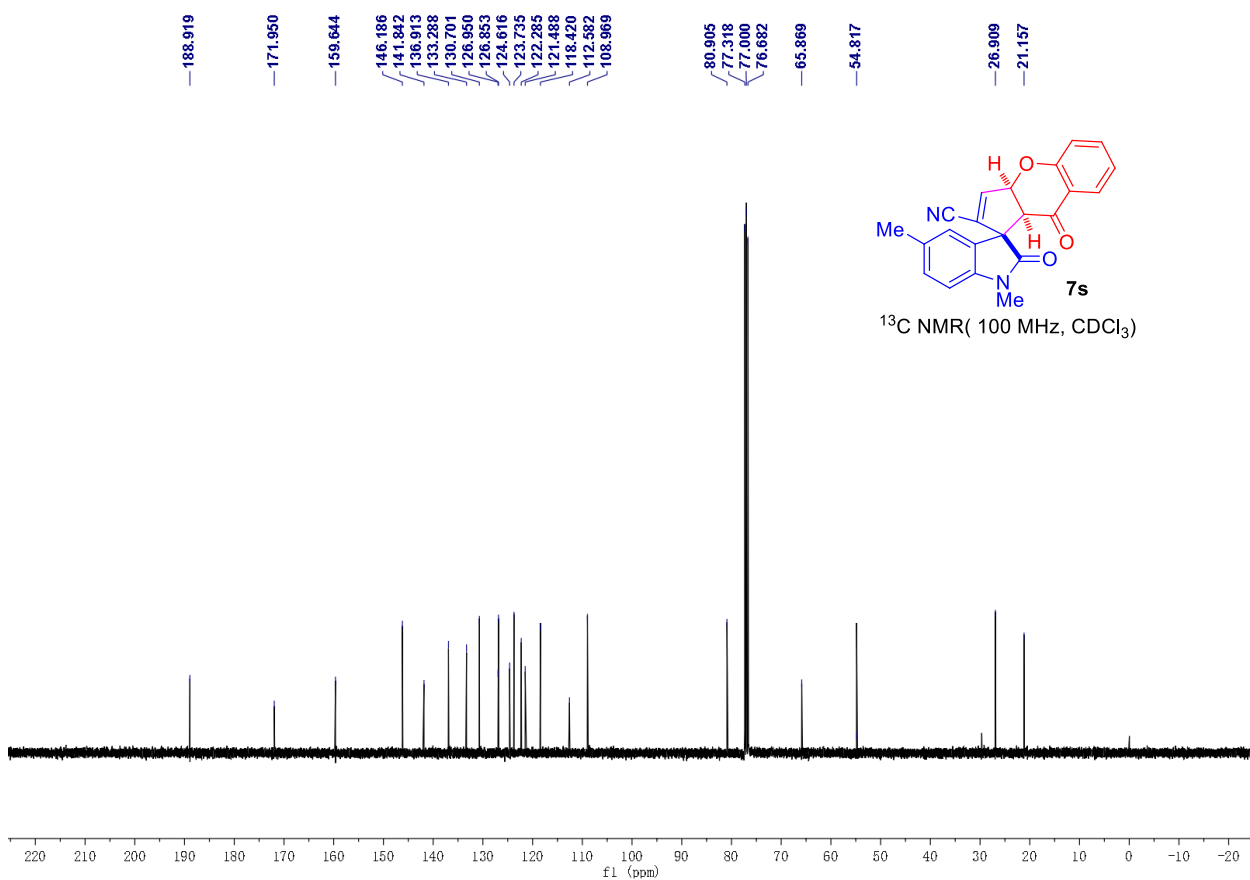

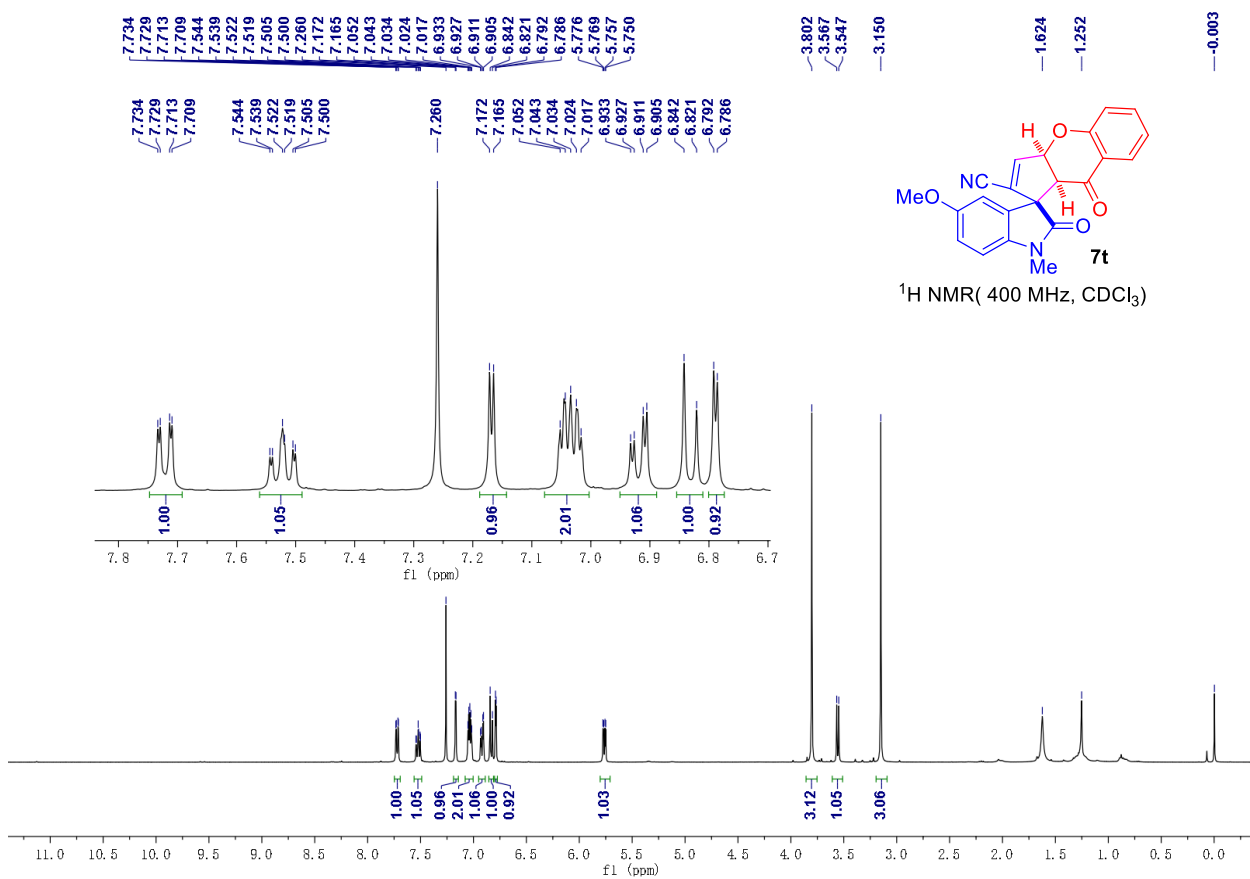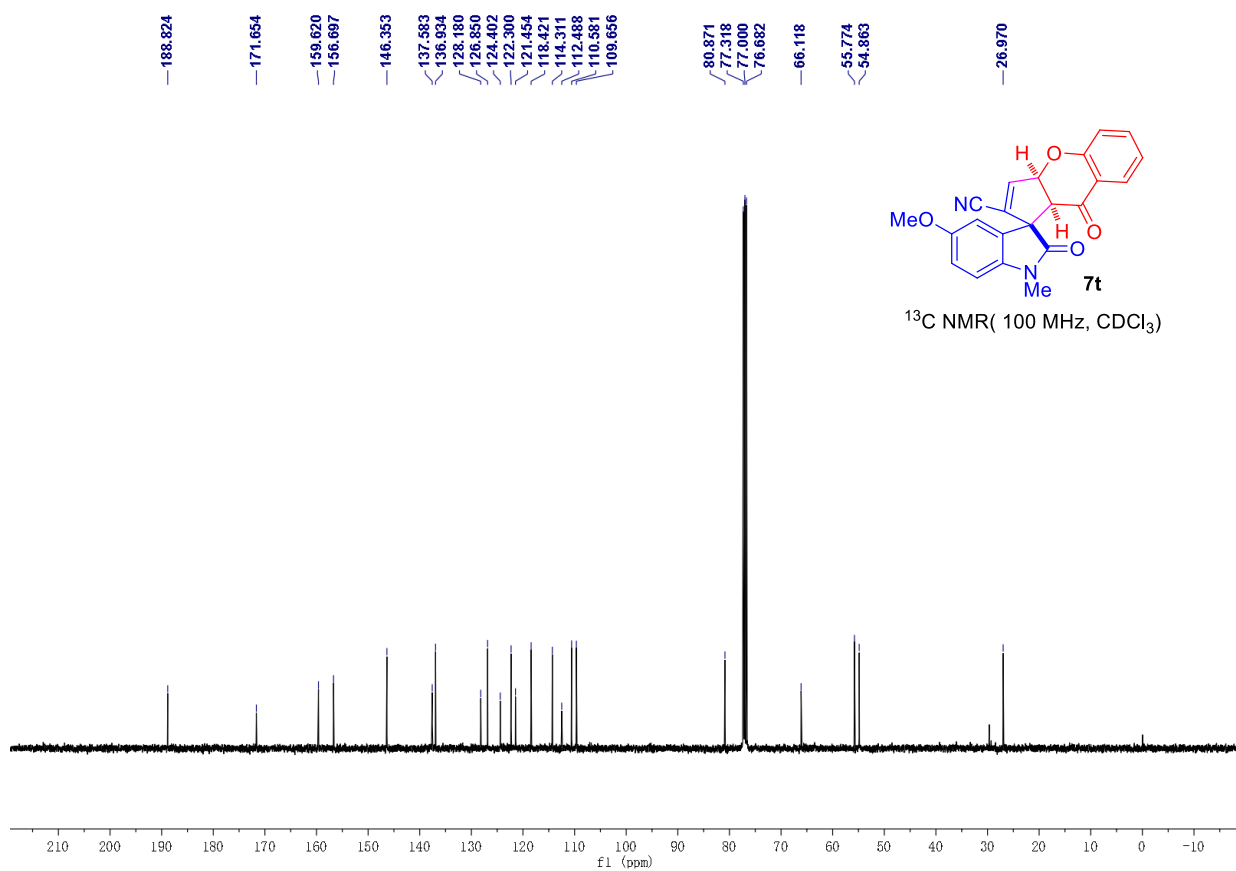

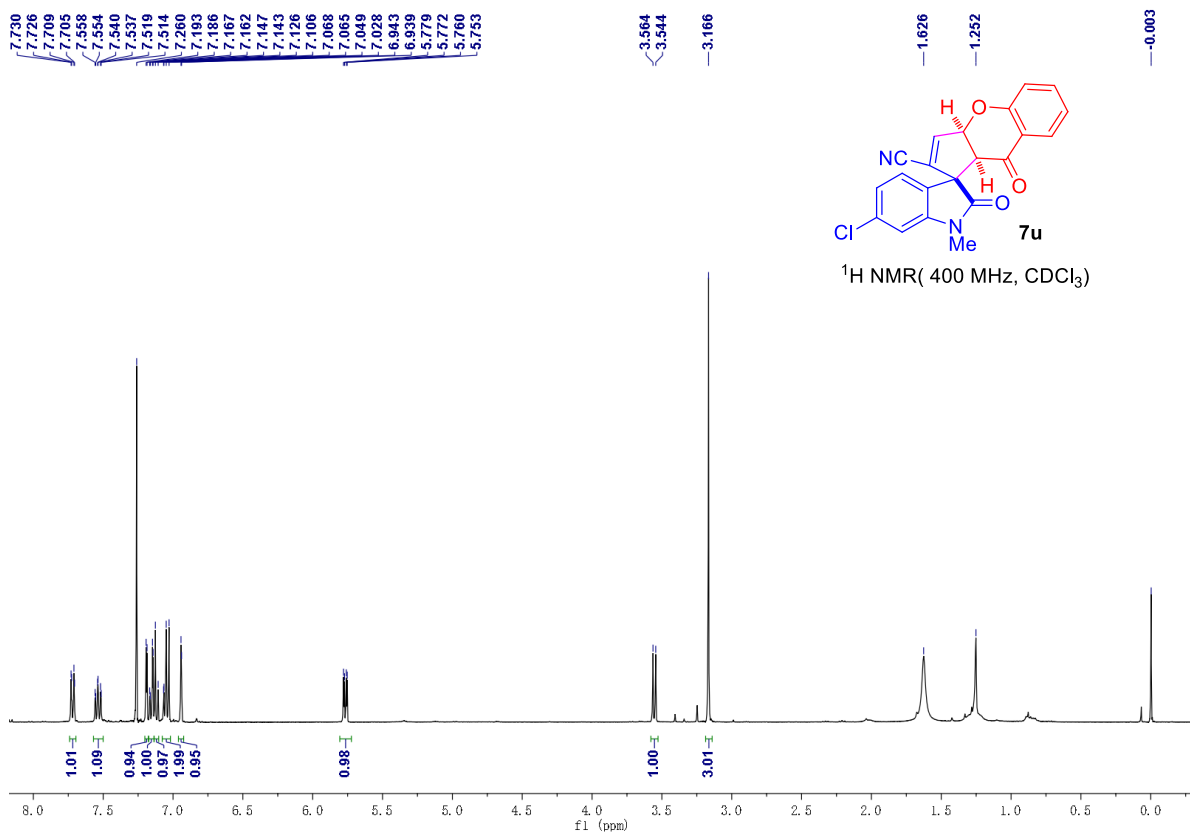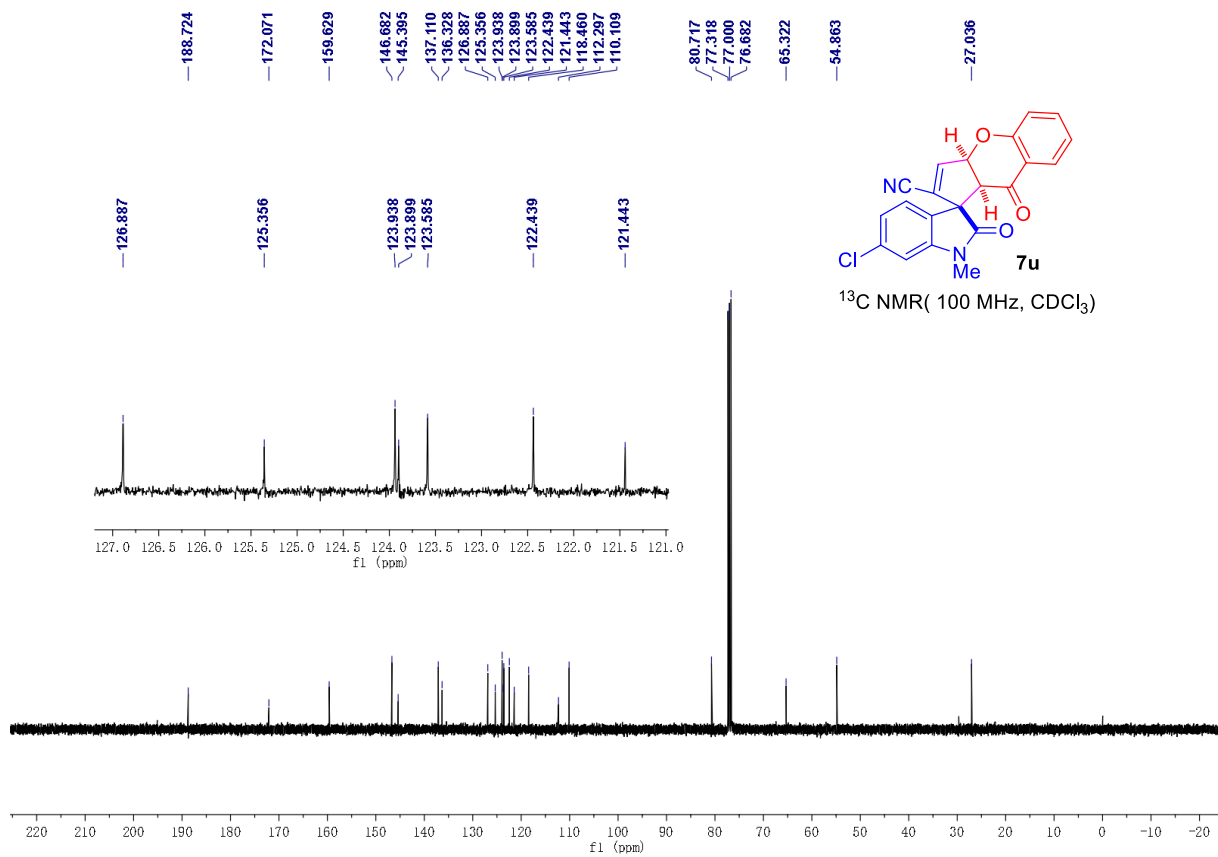

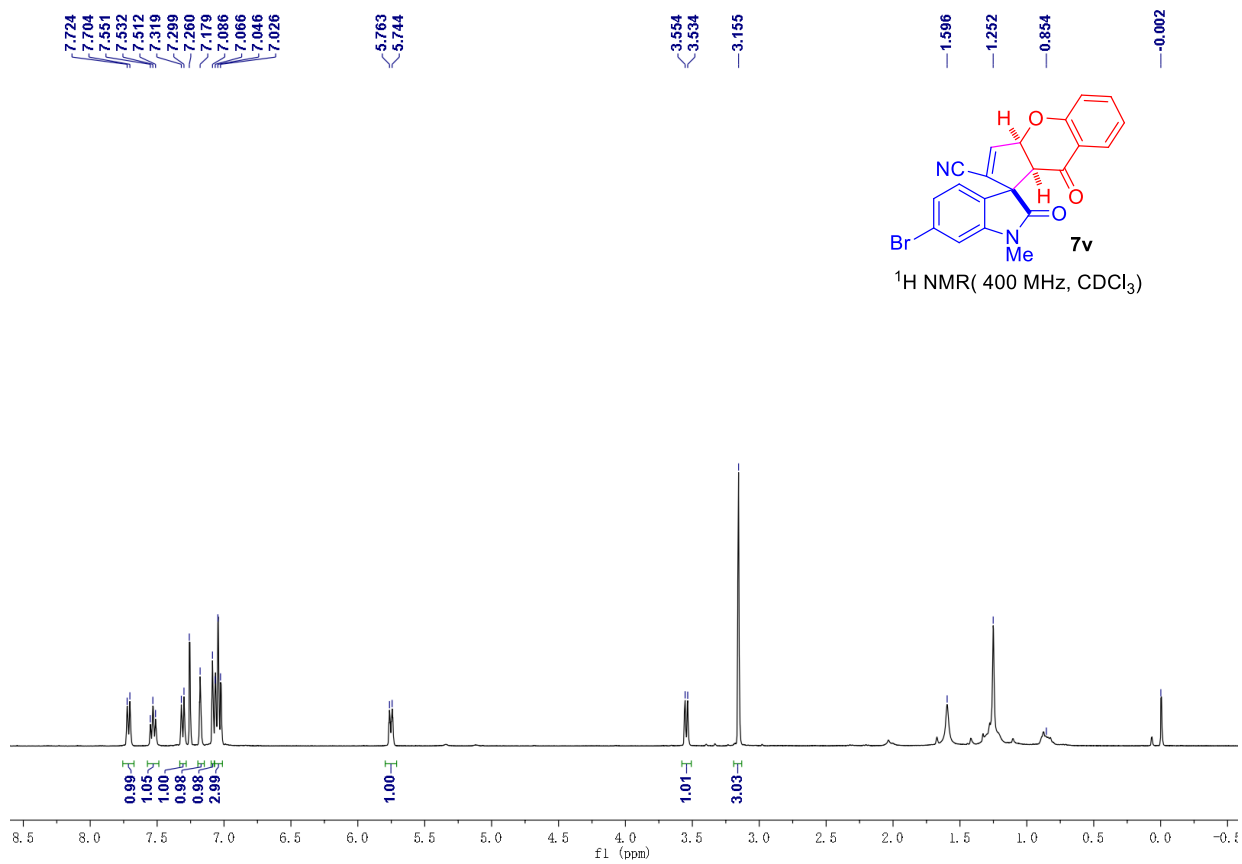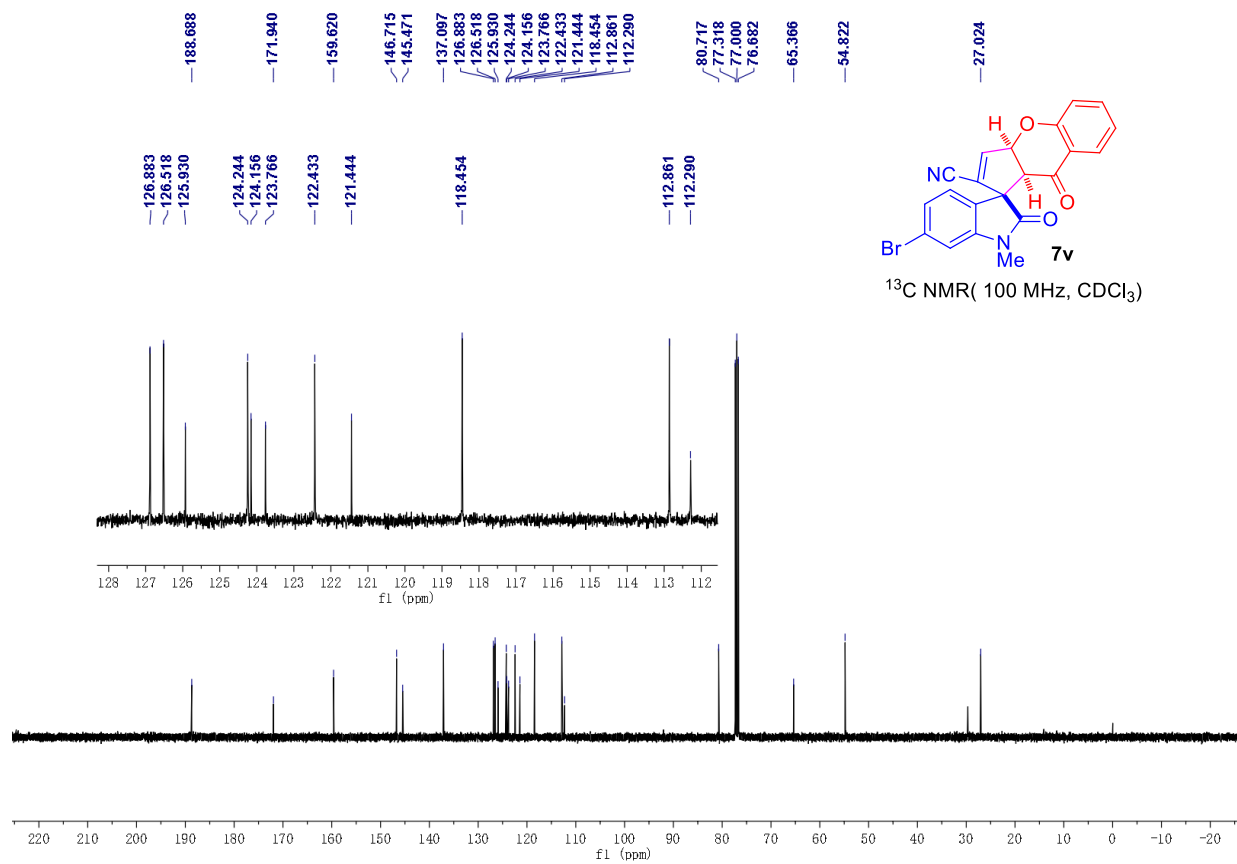

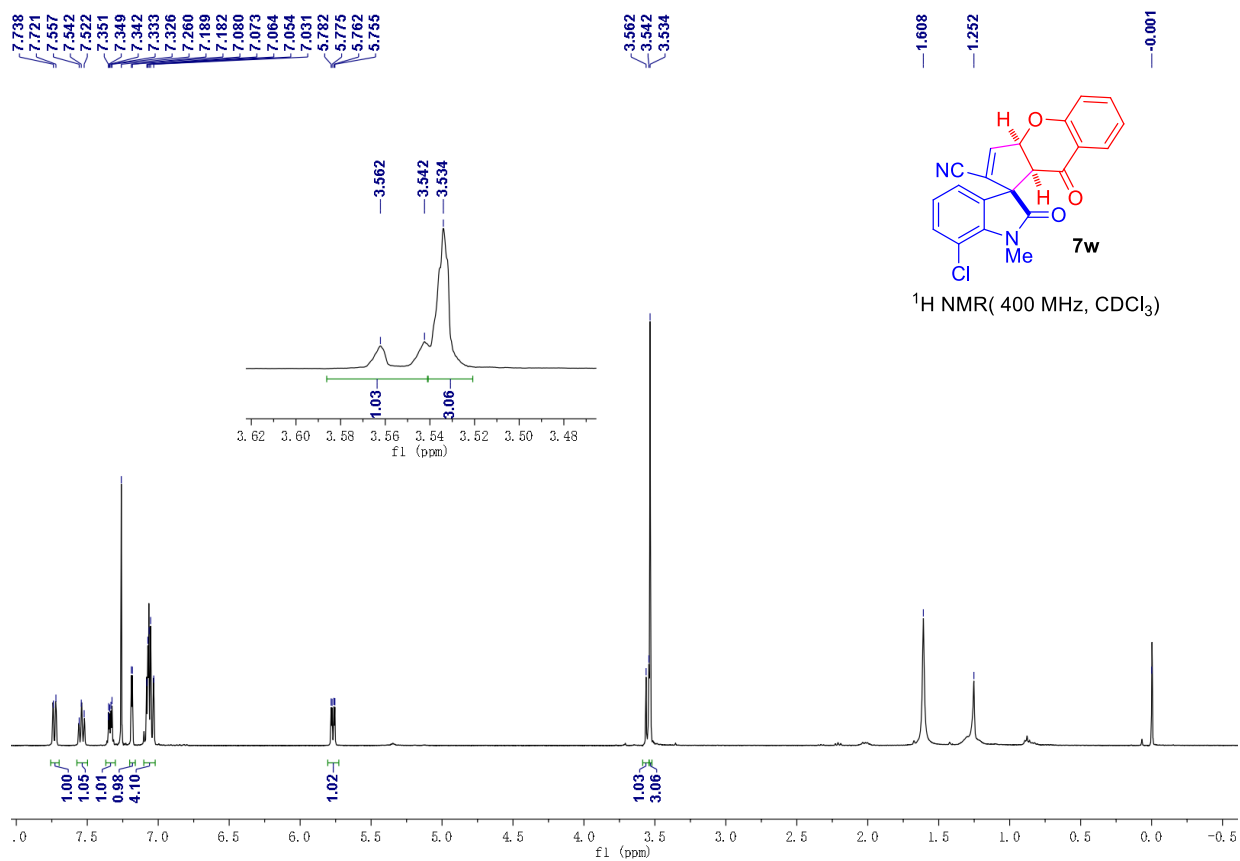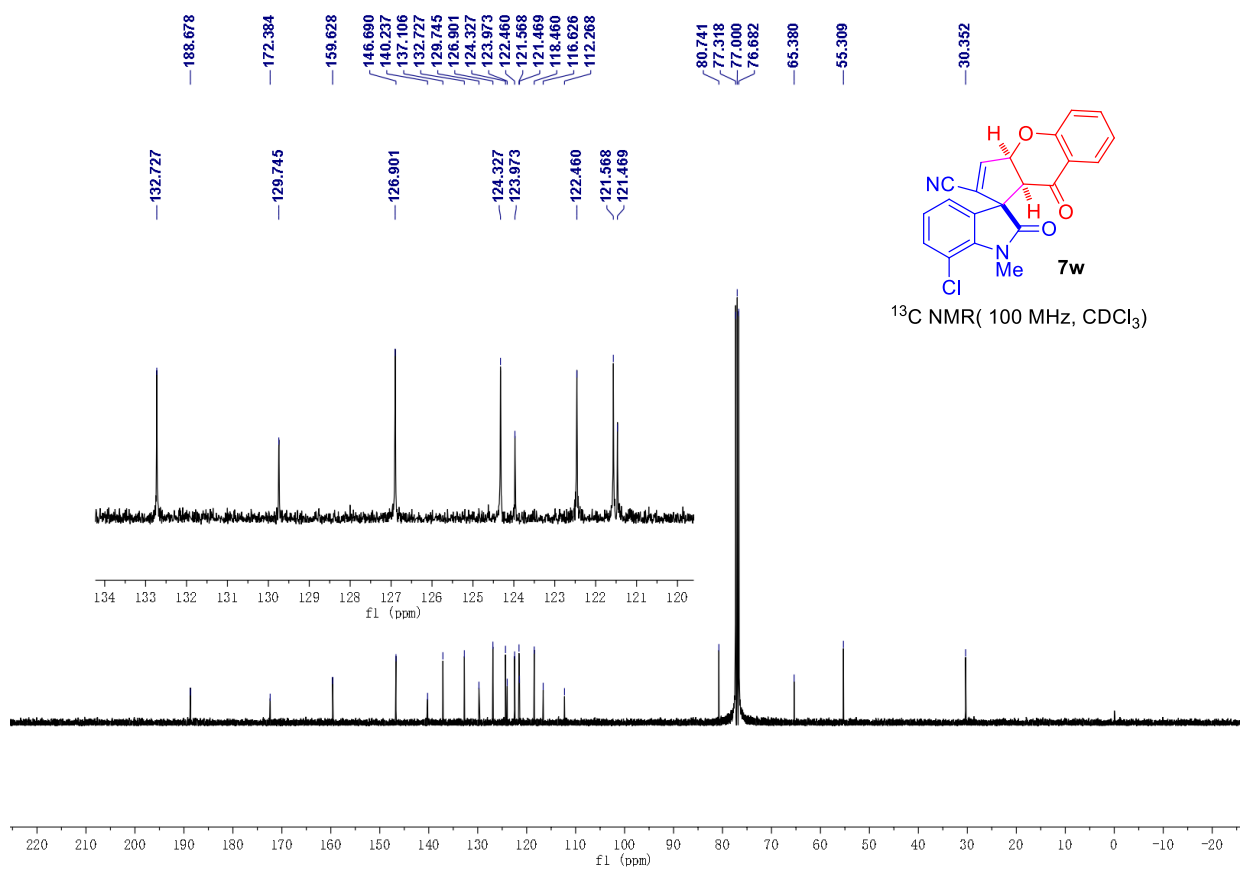

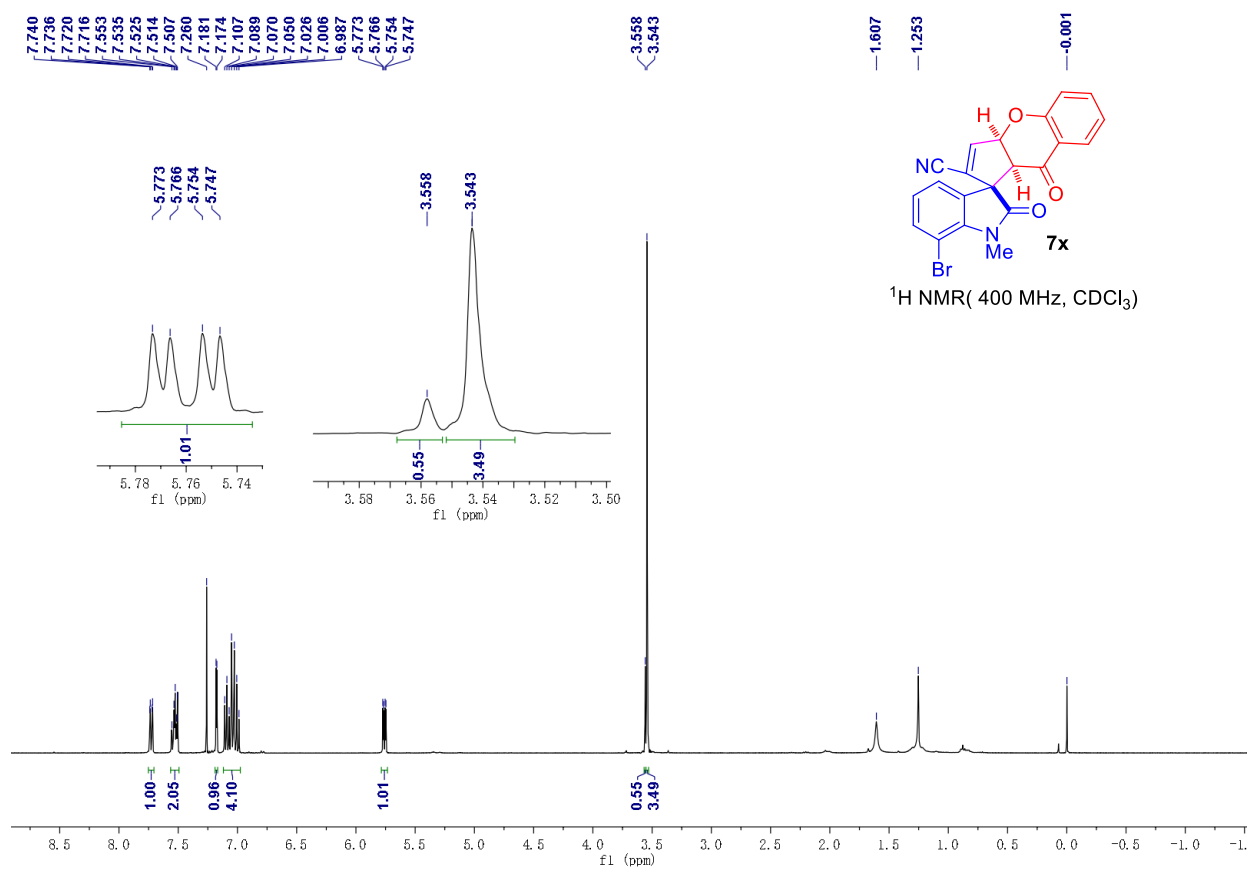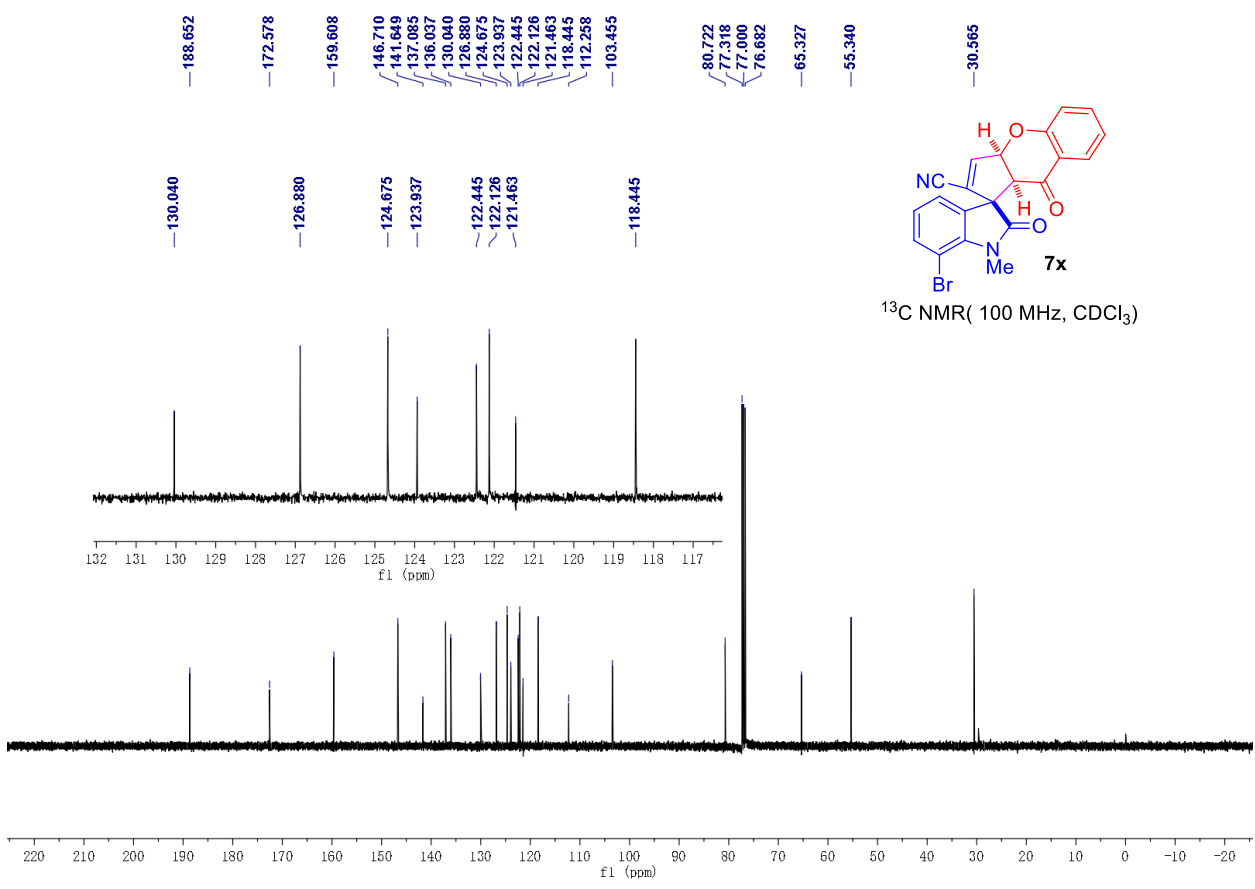



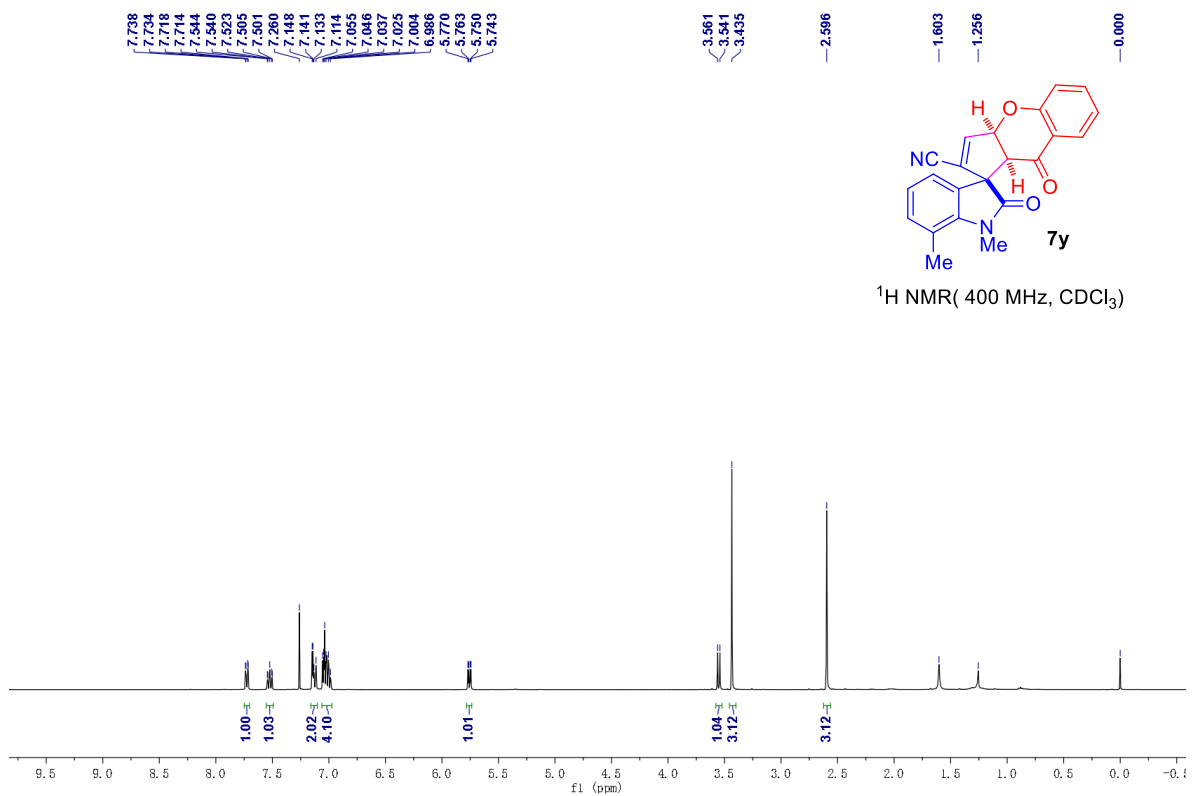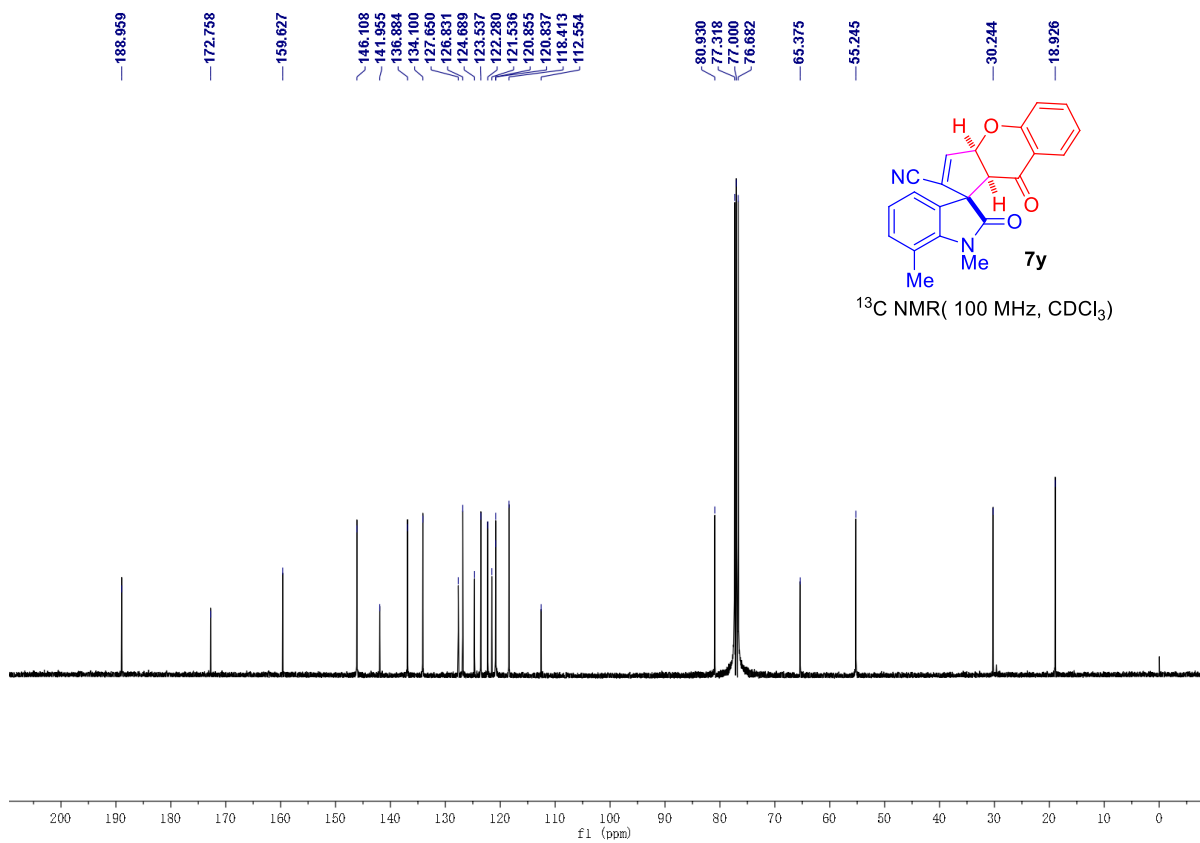

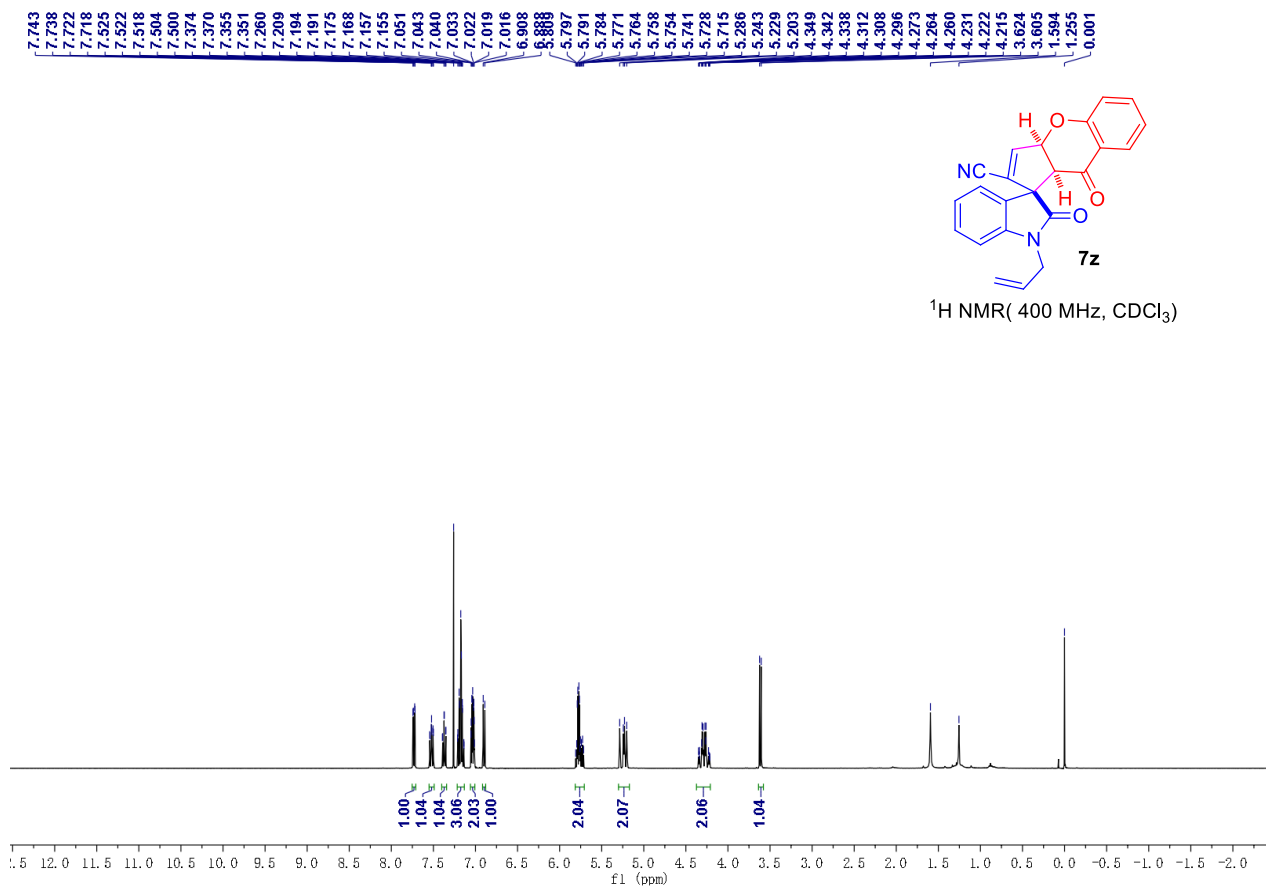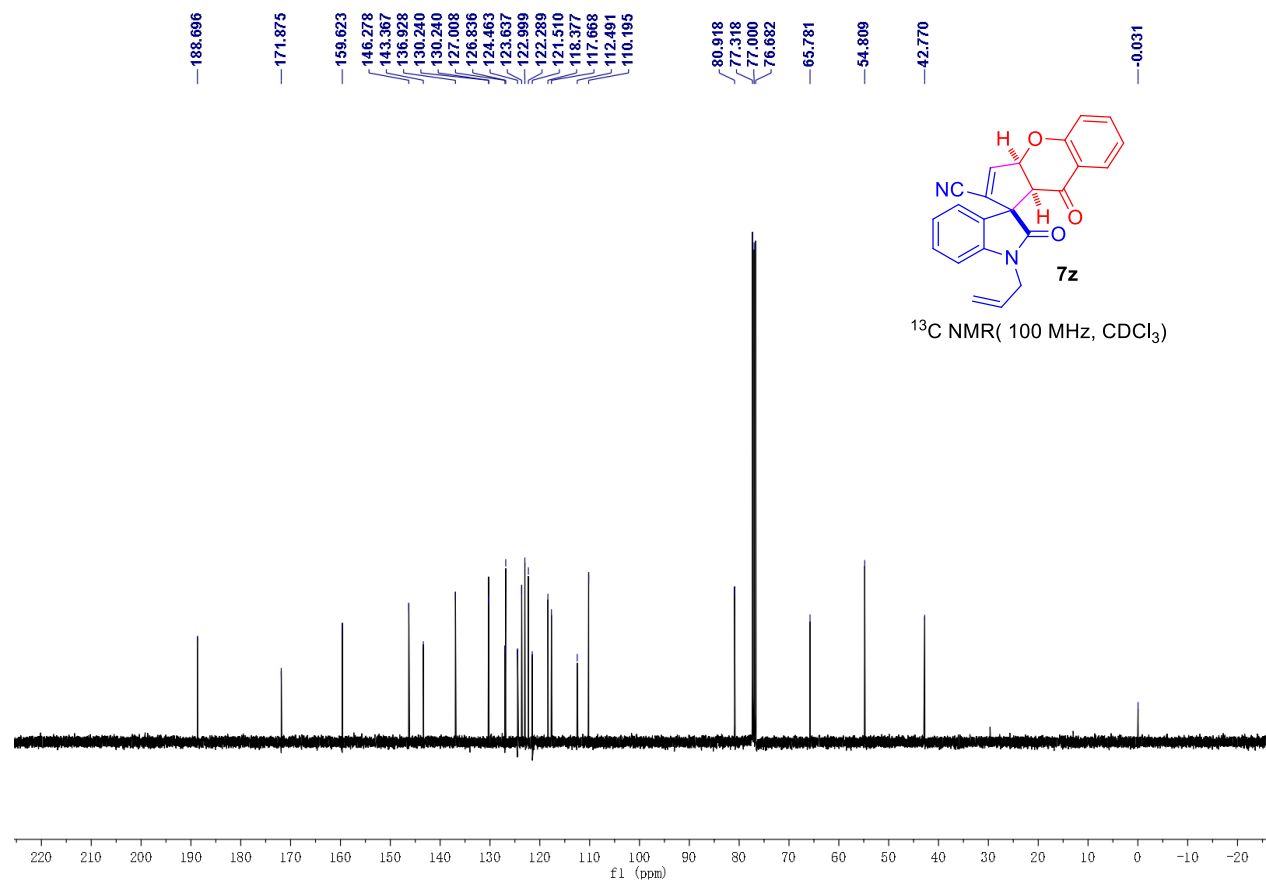

7.762  
7.740  
7.526  
7.510  
7.487  
7.323  
7.304  
7.286  
7.260  
7.240  
7.238  
7.223  
7.186  
7.166  
7.157  
7.150  
7.118  
7.097  
7.080  
7.045  
7.035  
7.026  
7.012  
6.721  
6.701  
5.775  
5.768  
5.765  
5.748  
4.903  
4.863  
4.855  
4.815

3.637  
3.617

1.628

1.244

-0.012

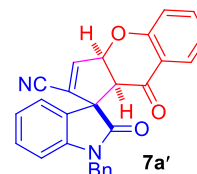

<sup>1</sup>H NMR( 400 MHz, CDCl<sub>3</sub>)

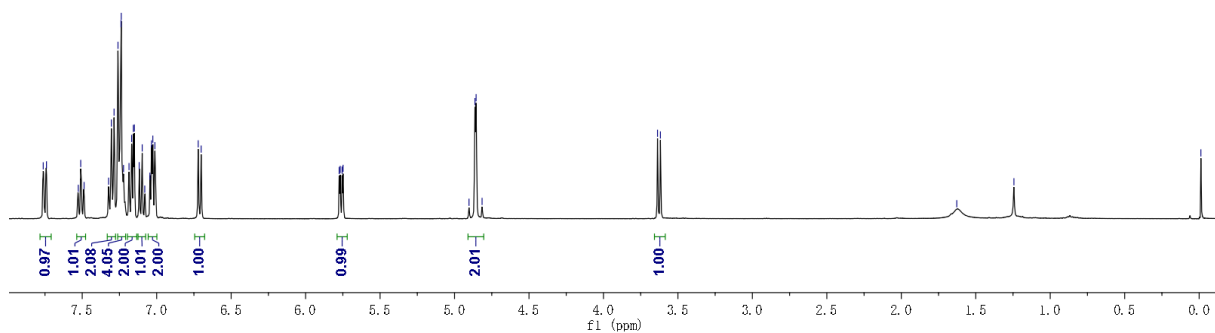

188.684

172.280

159.618

146.357

143.243

136.966

134.645

130.240

128.749

127.628

127.008

126.988

126.830

124.457

123.702

123.014

122.279

121.469

118.378

112.520

110.376

80.931

77.318

77.000

76.682

65.845

54.775

44.376

-0.039

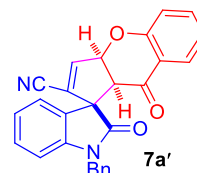

<sup>13</sup>C NMR( 100 MHz, CDCl<sub>3</sub>)

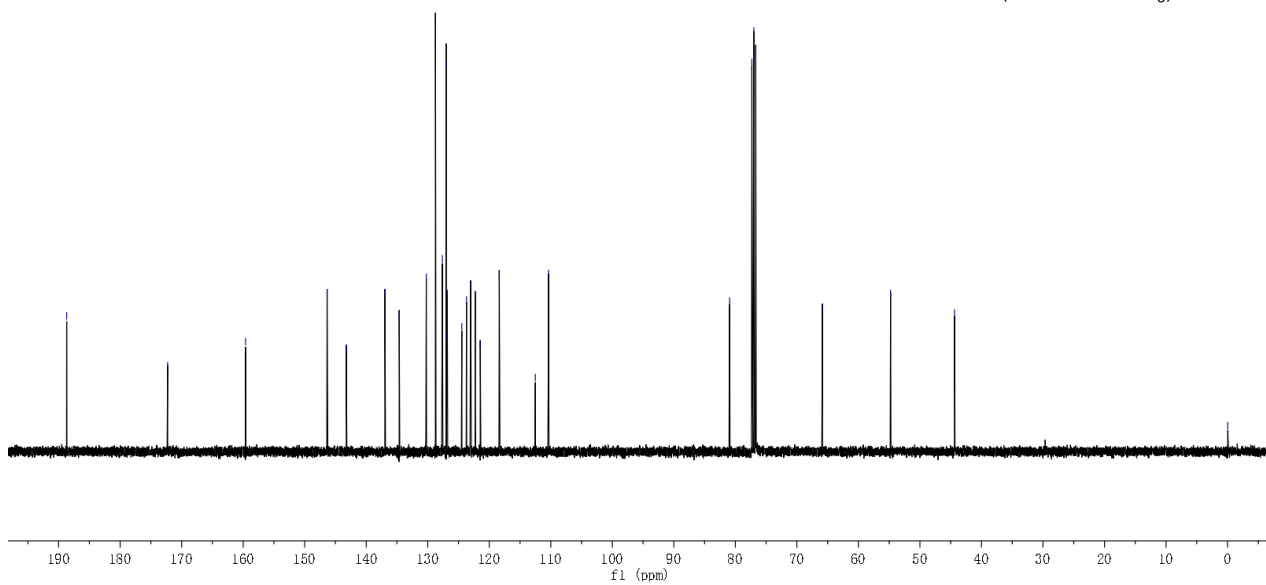

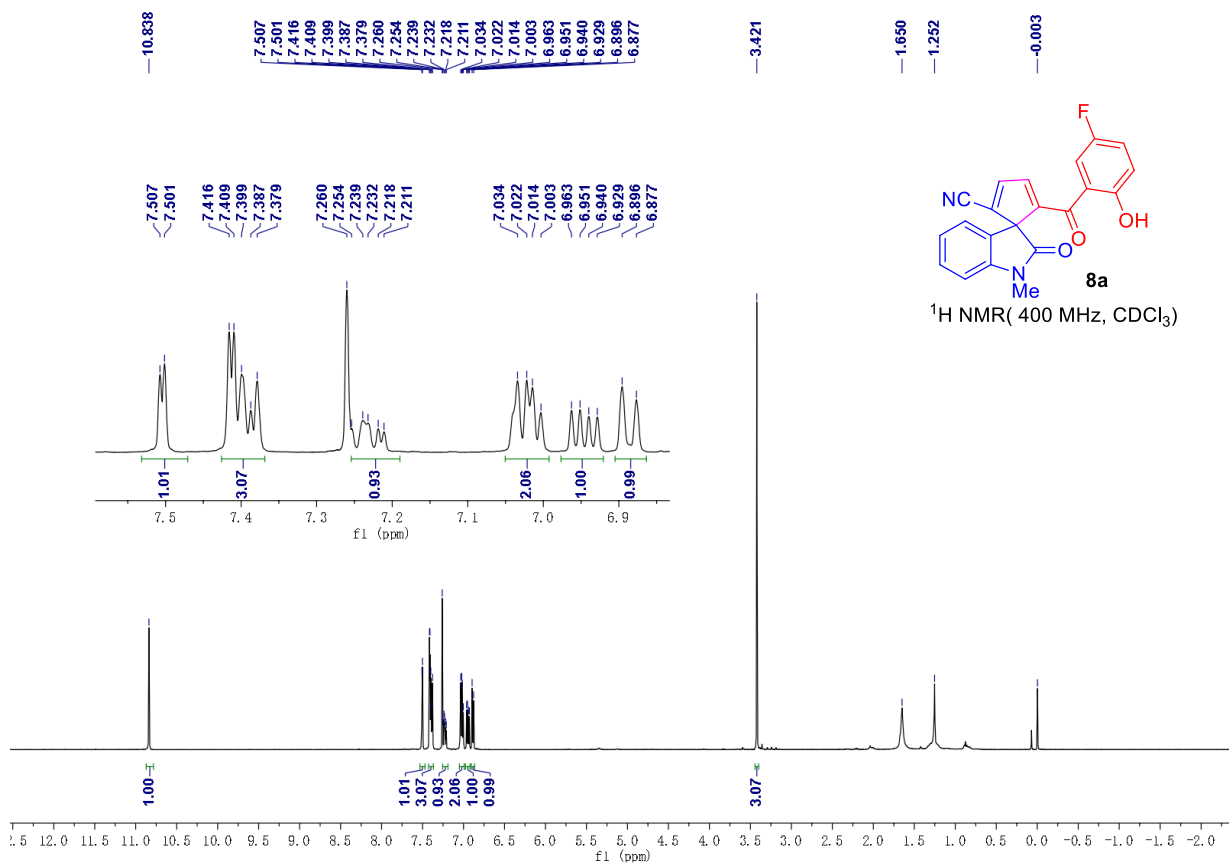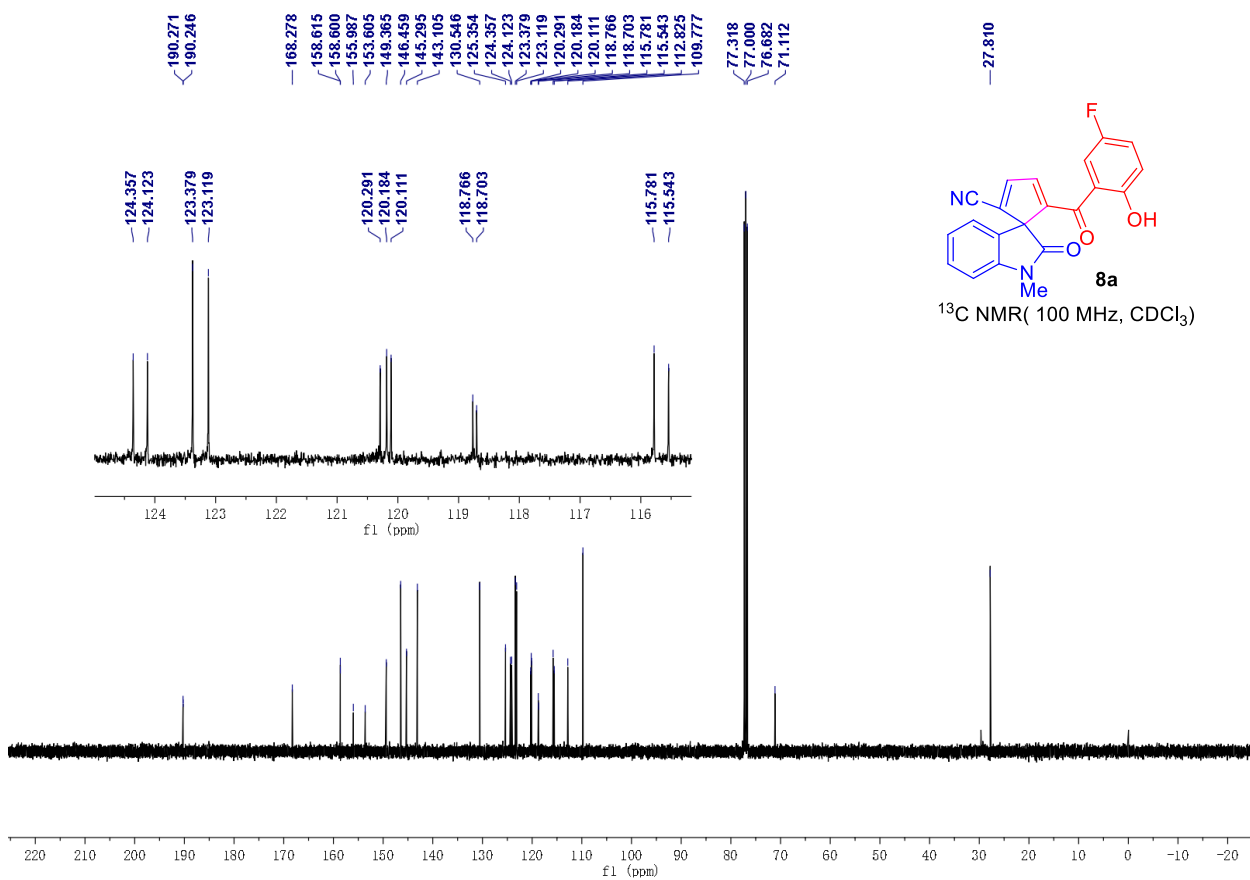

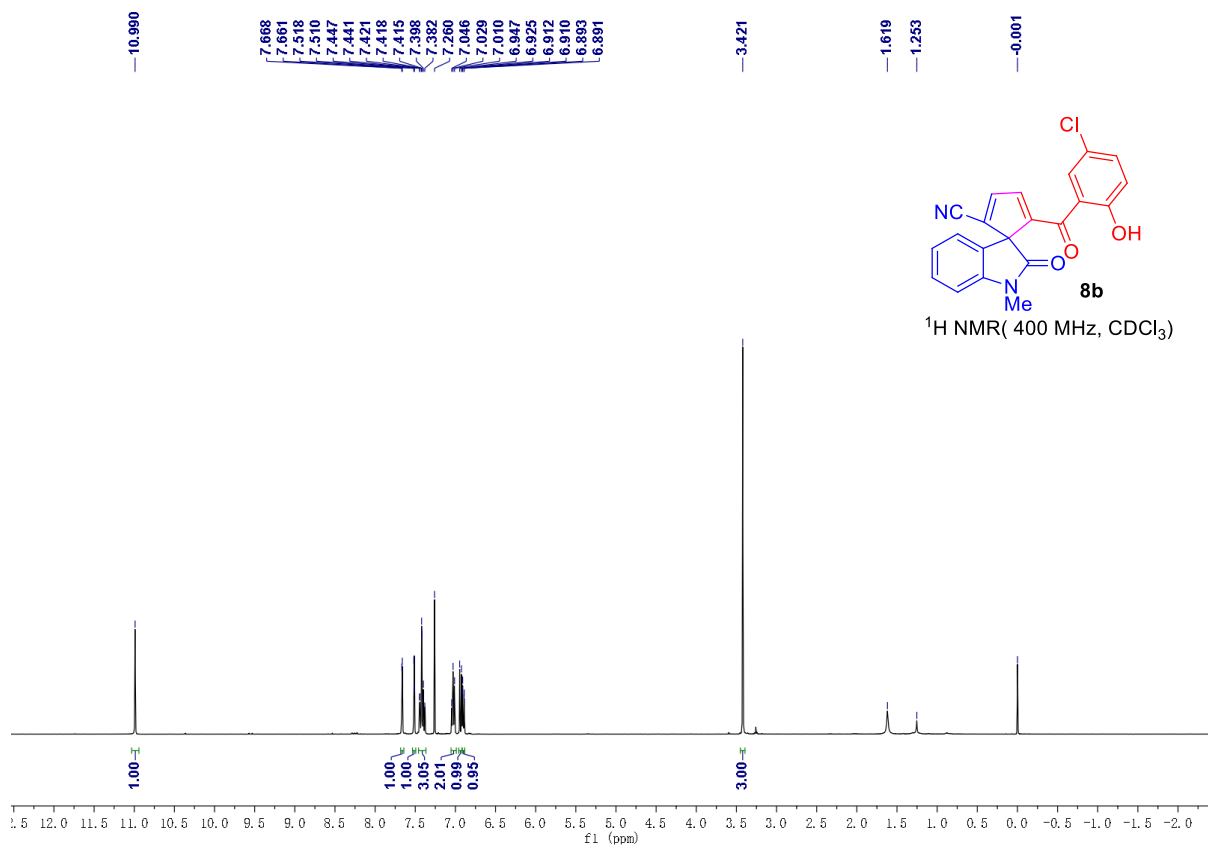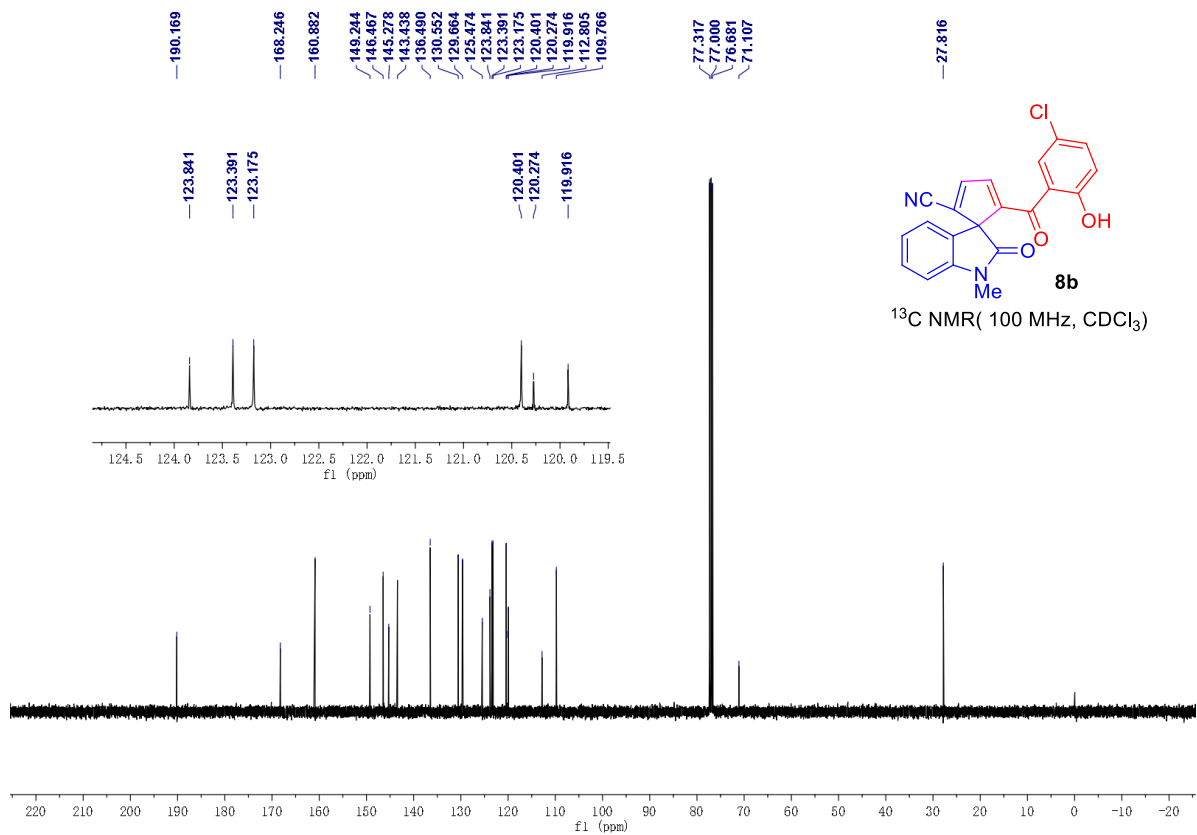

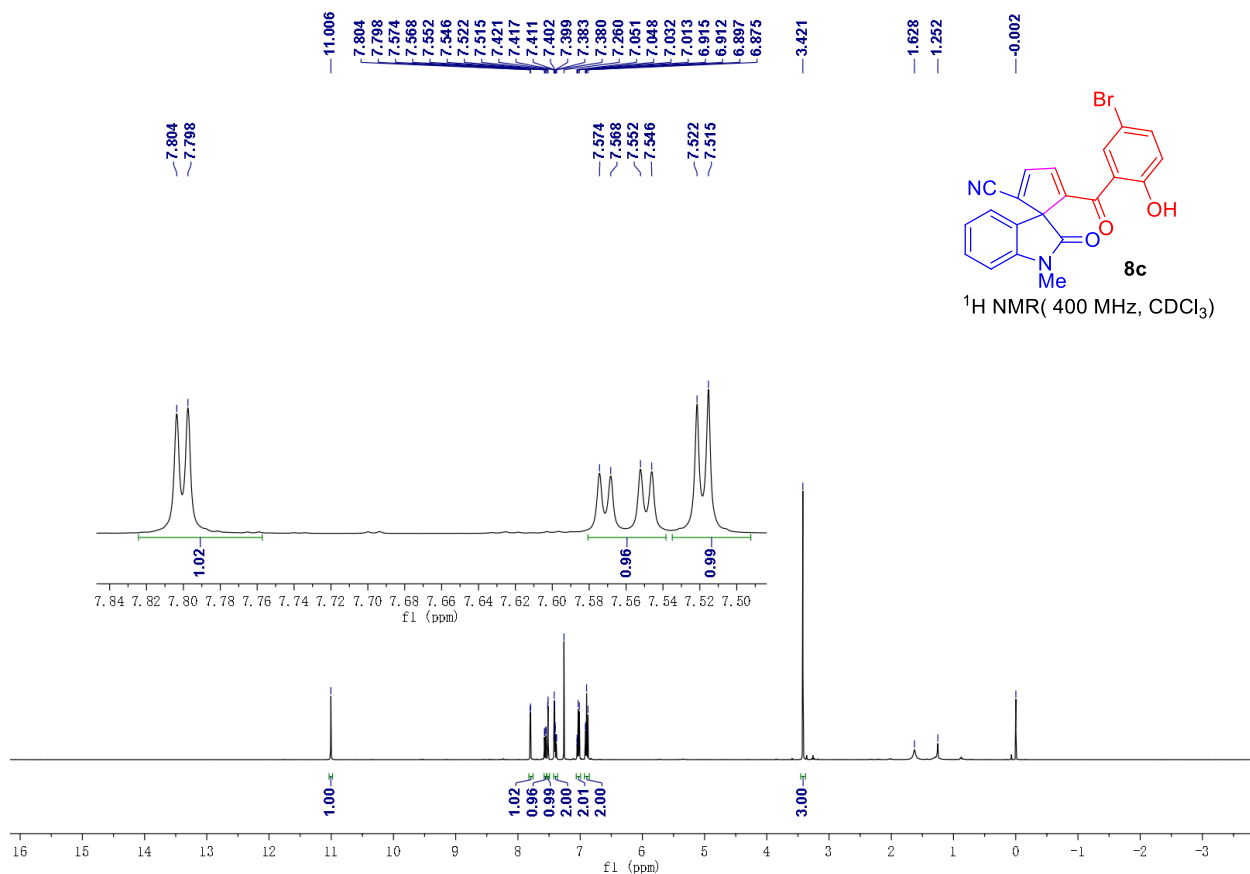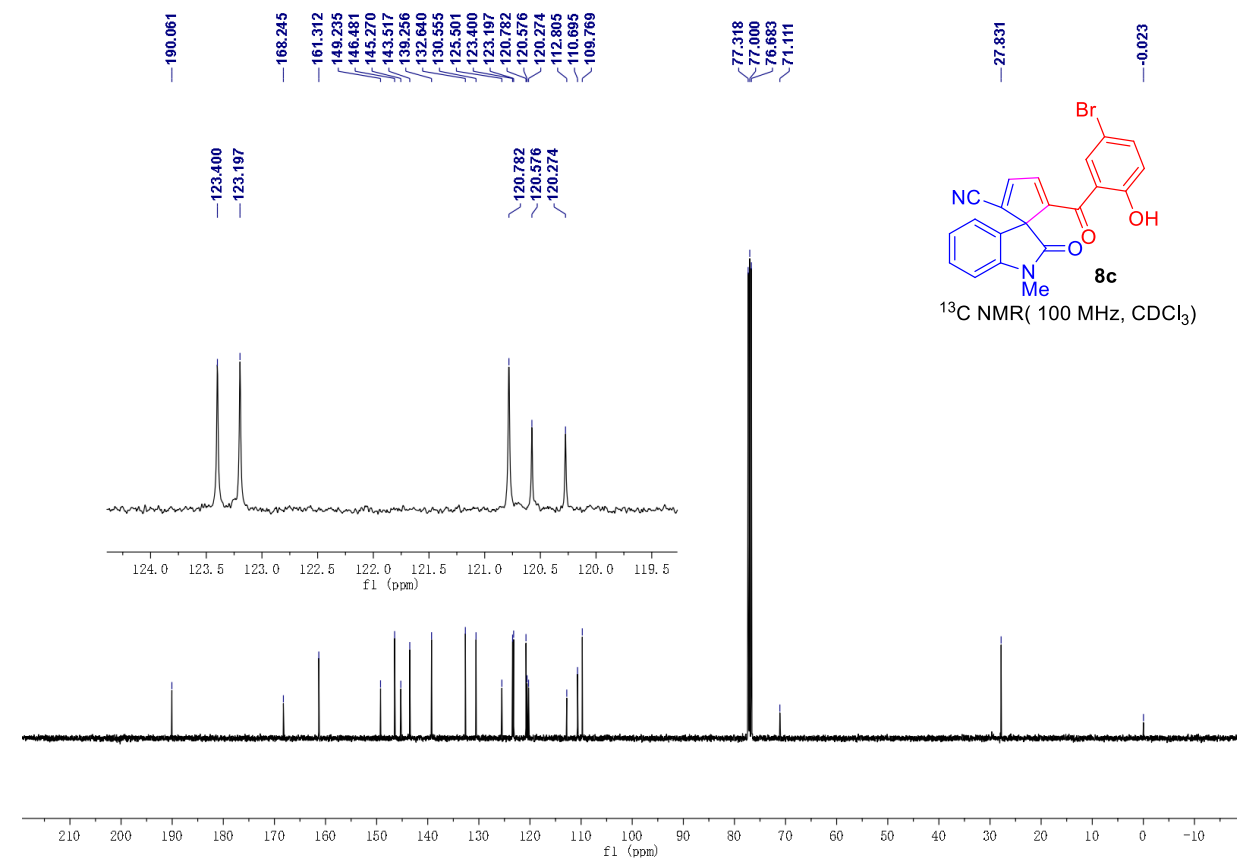

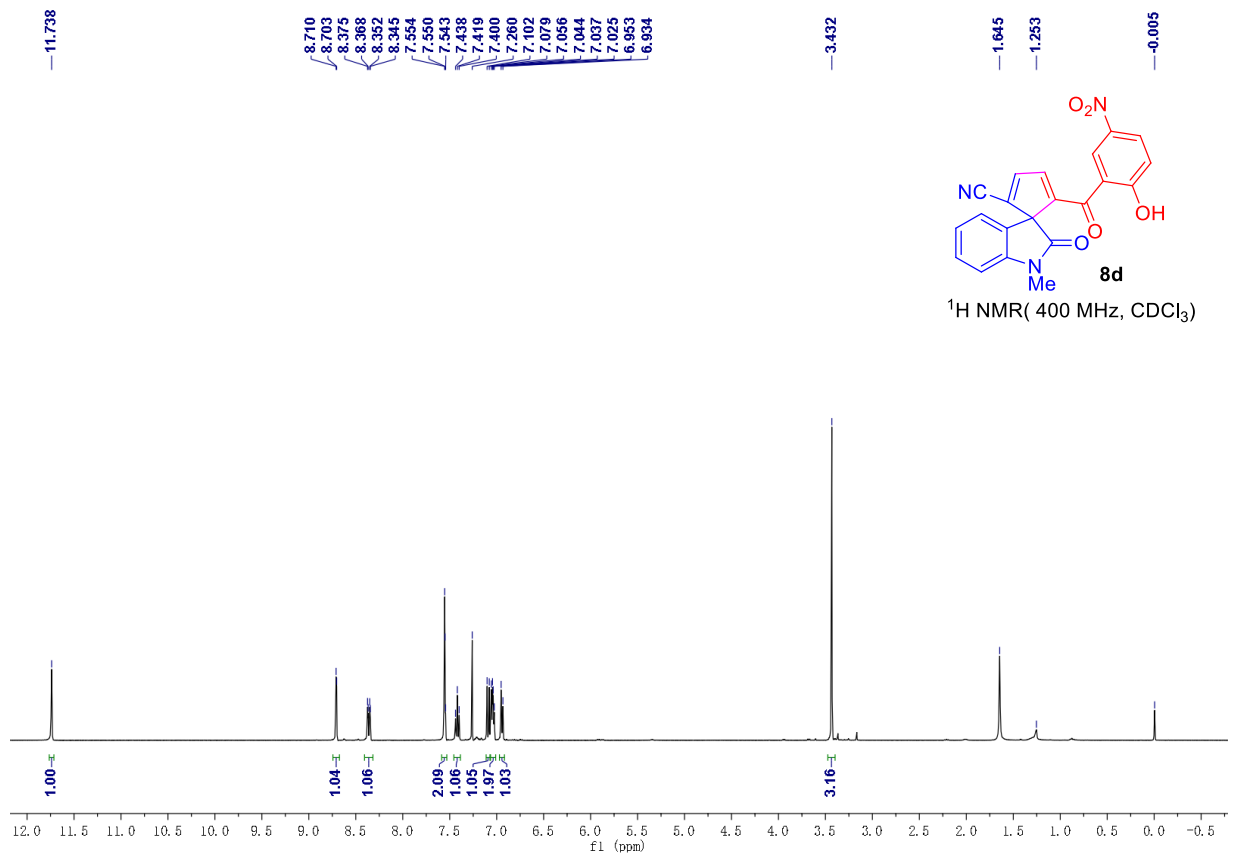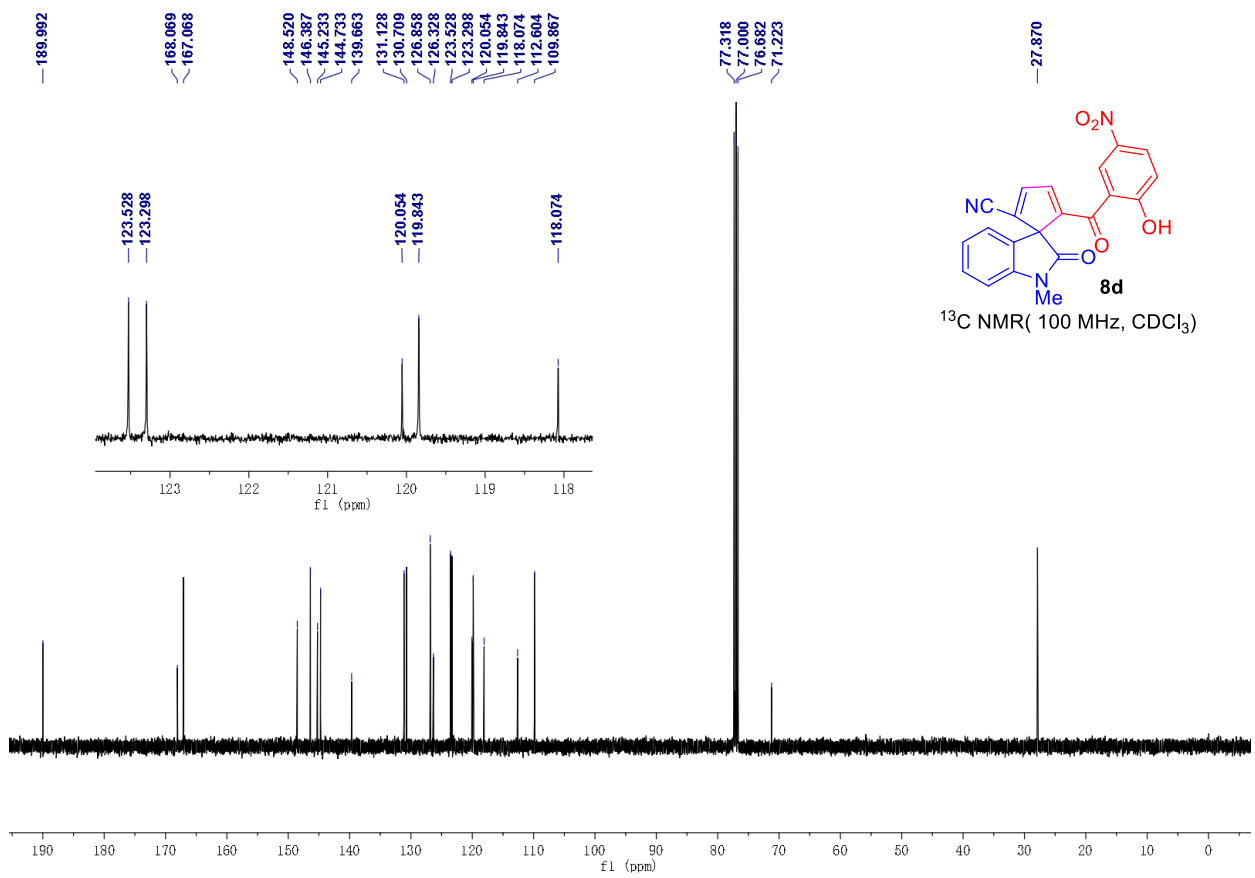

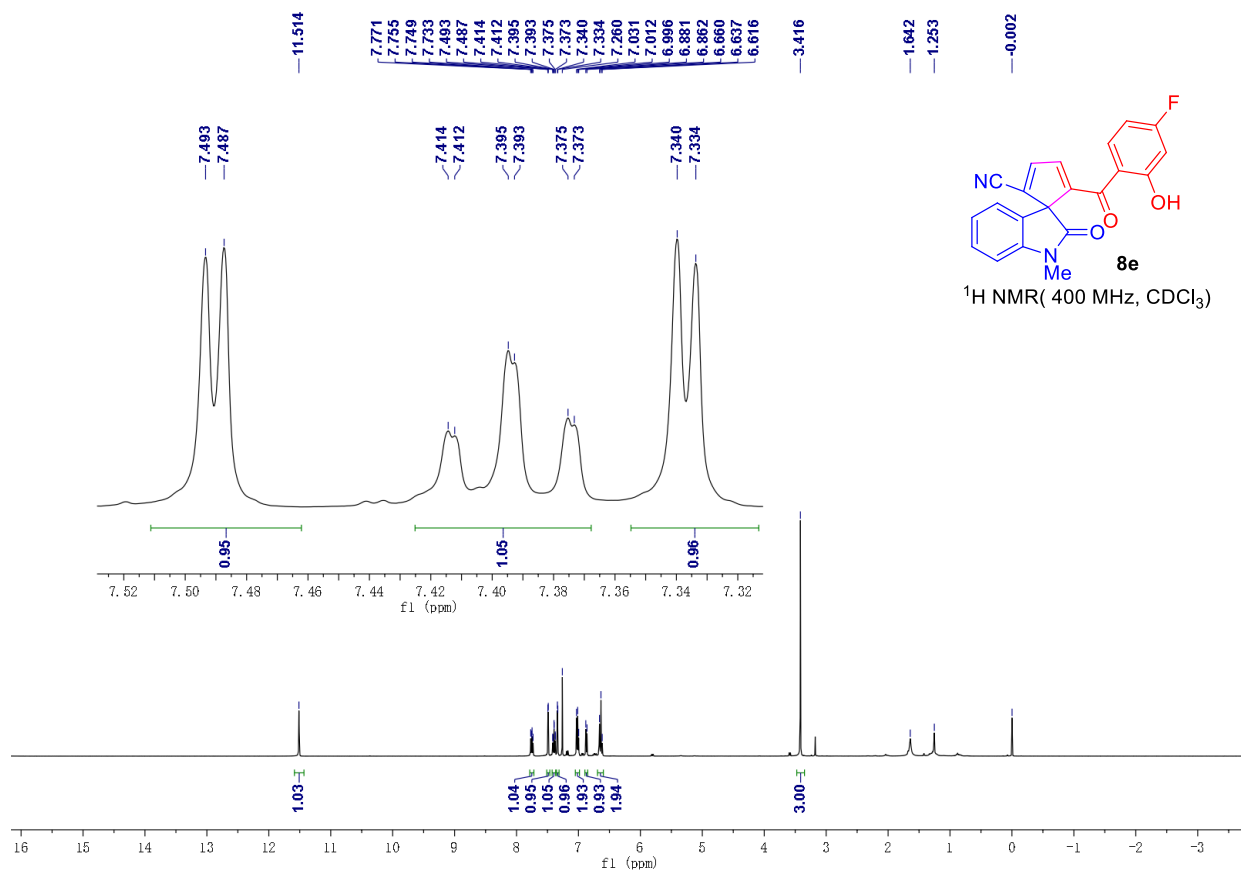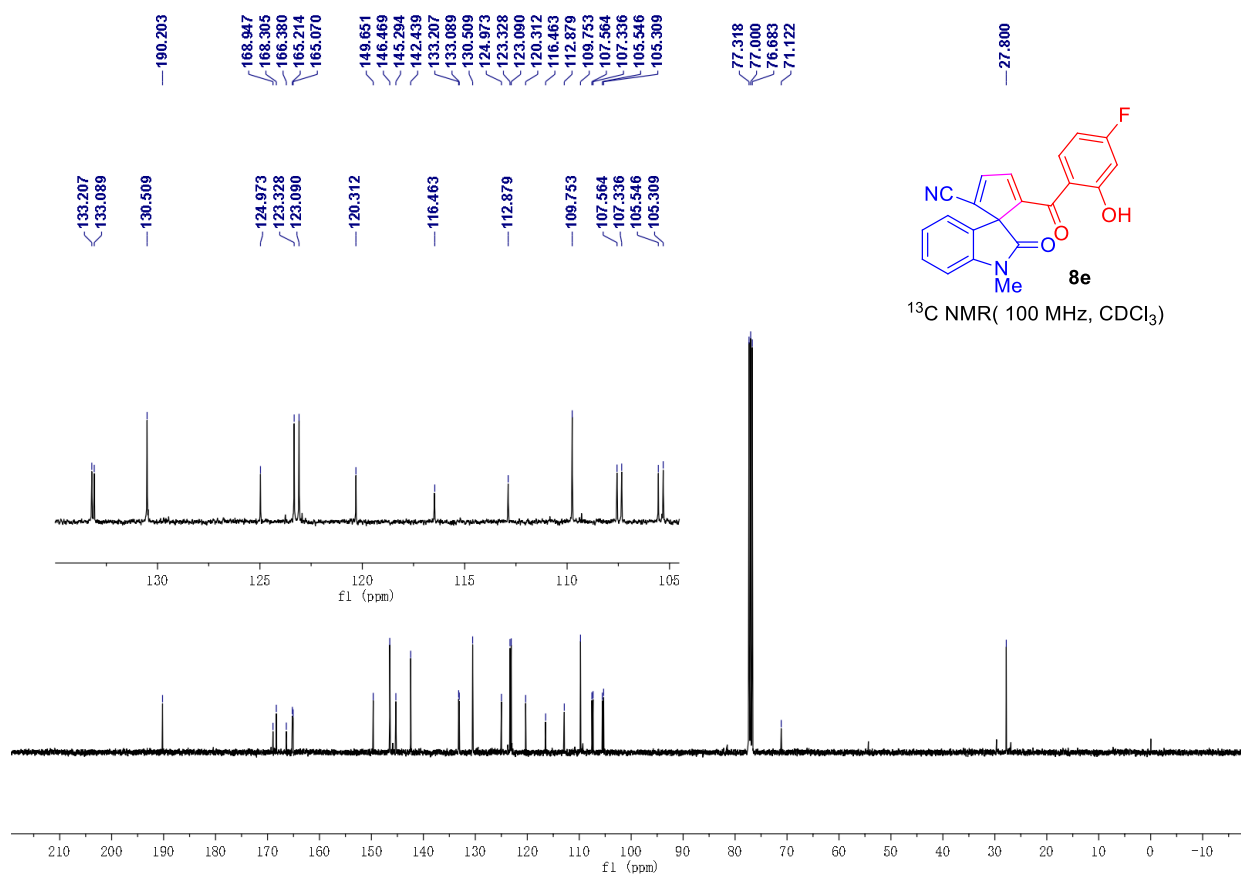



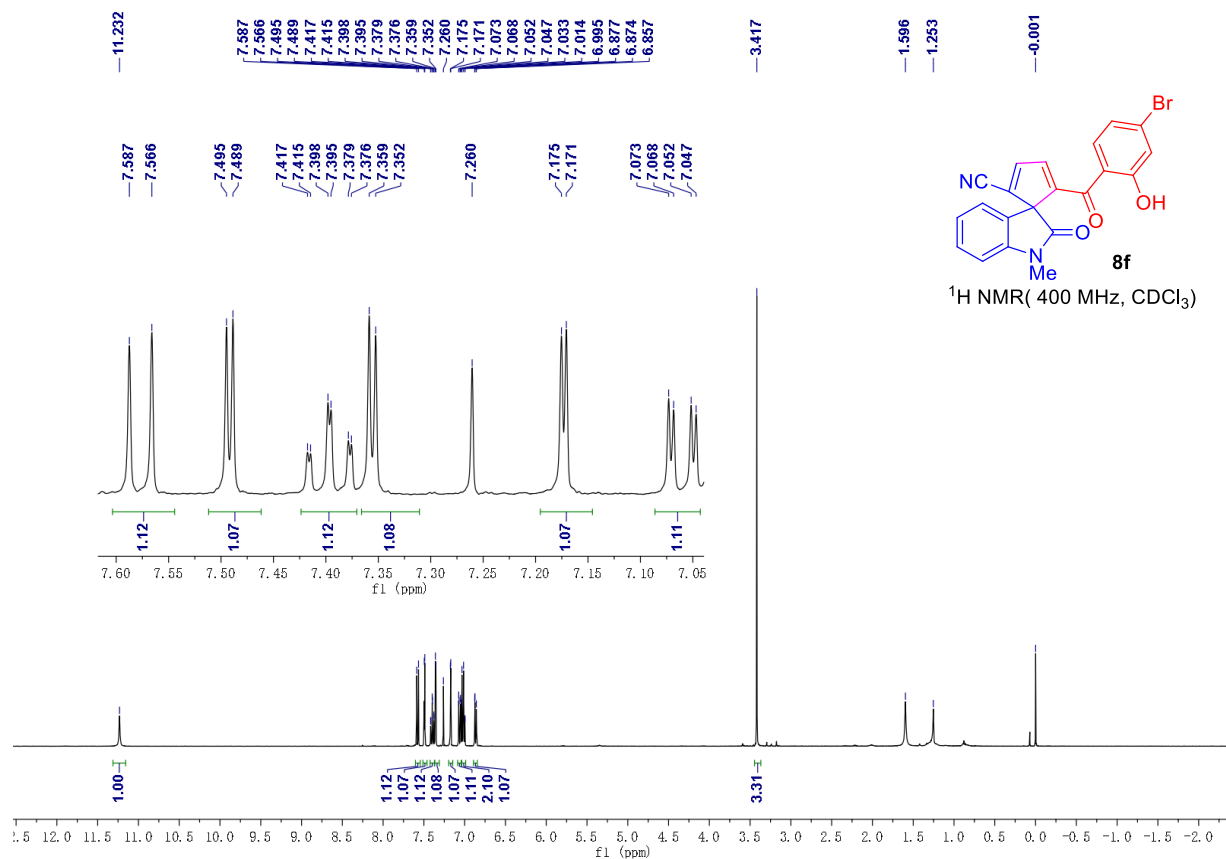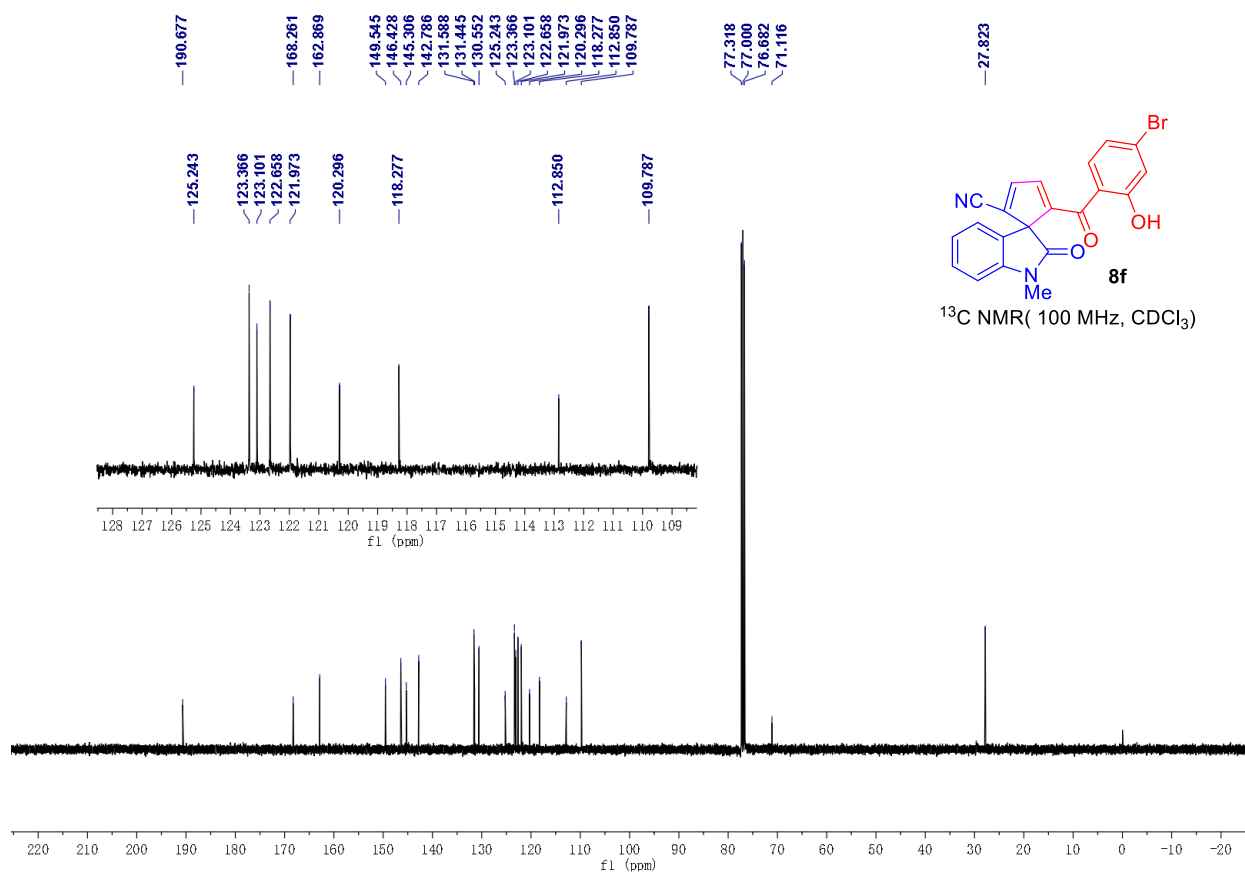

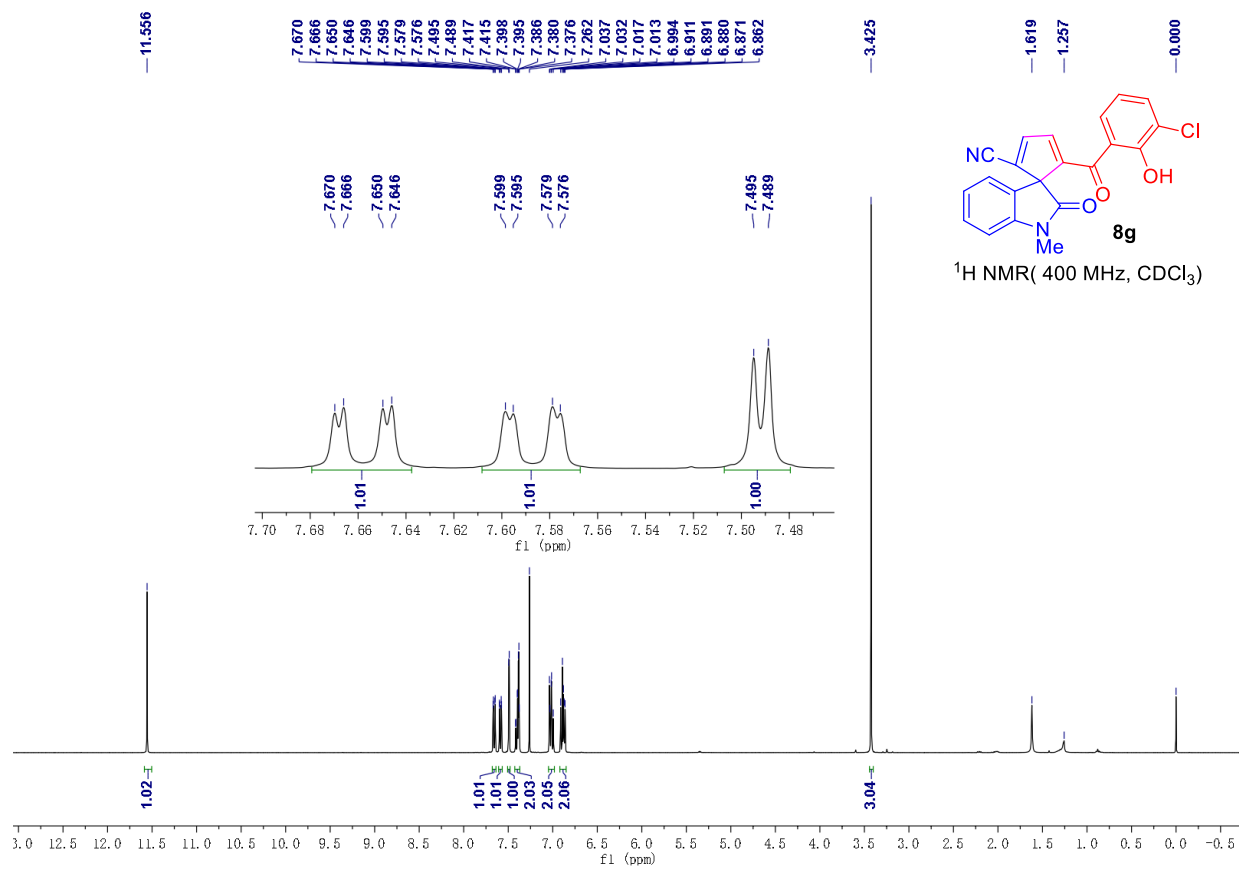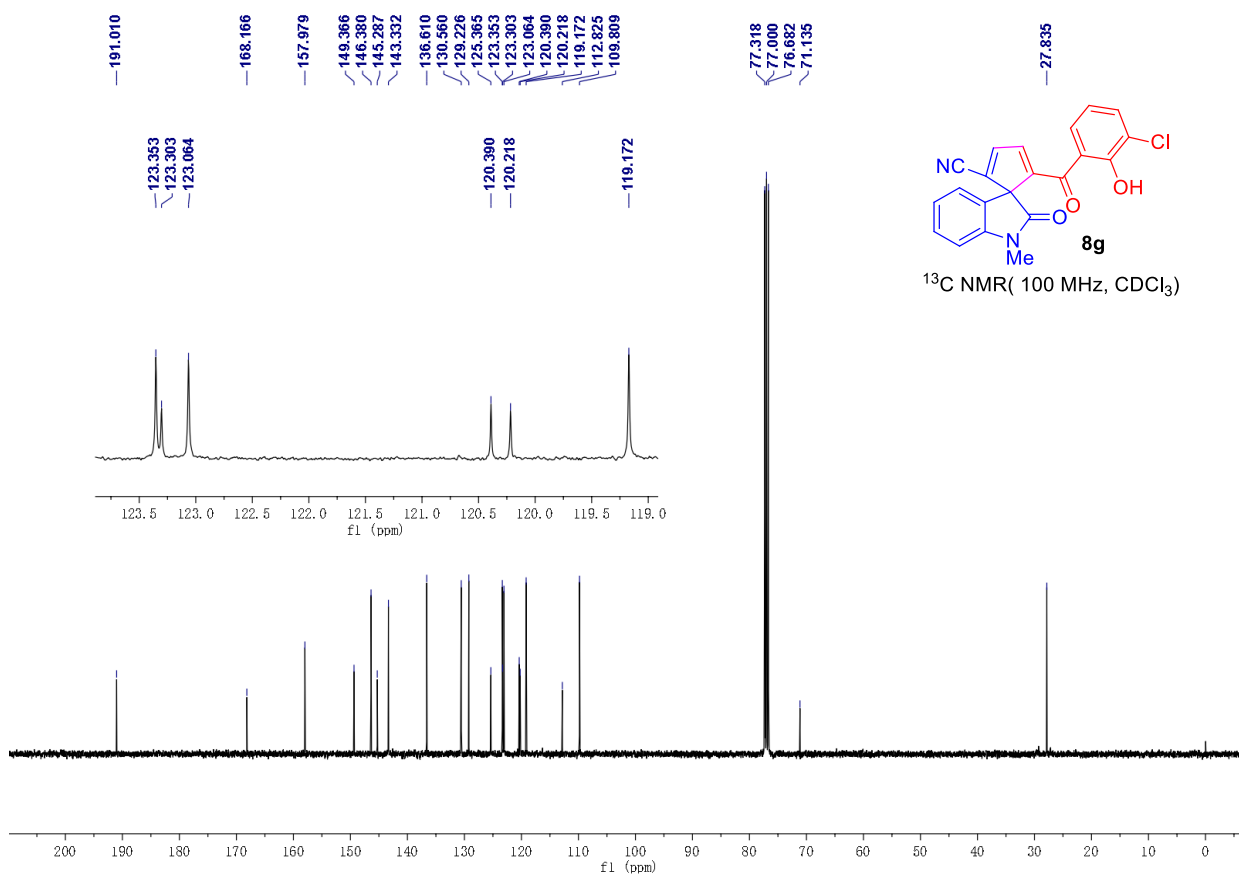

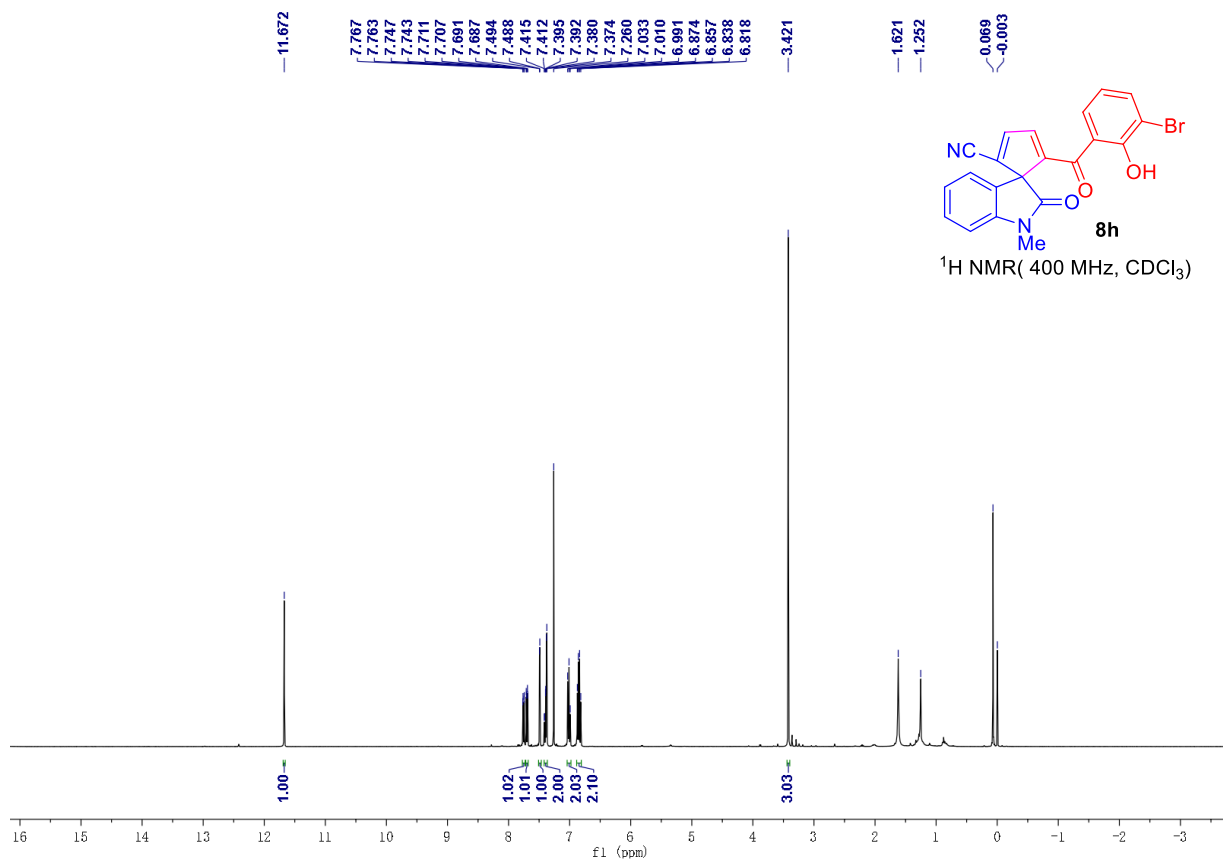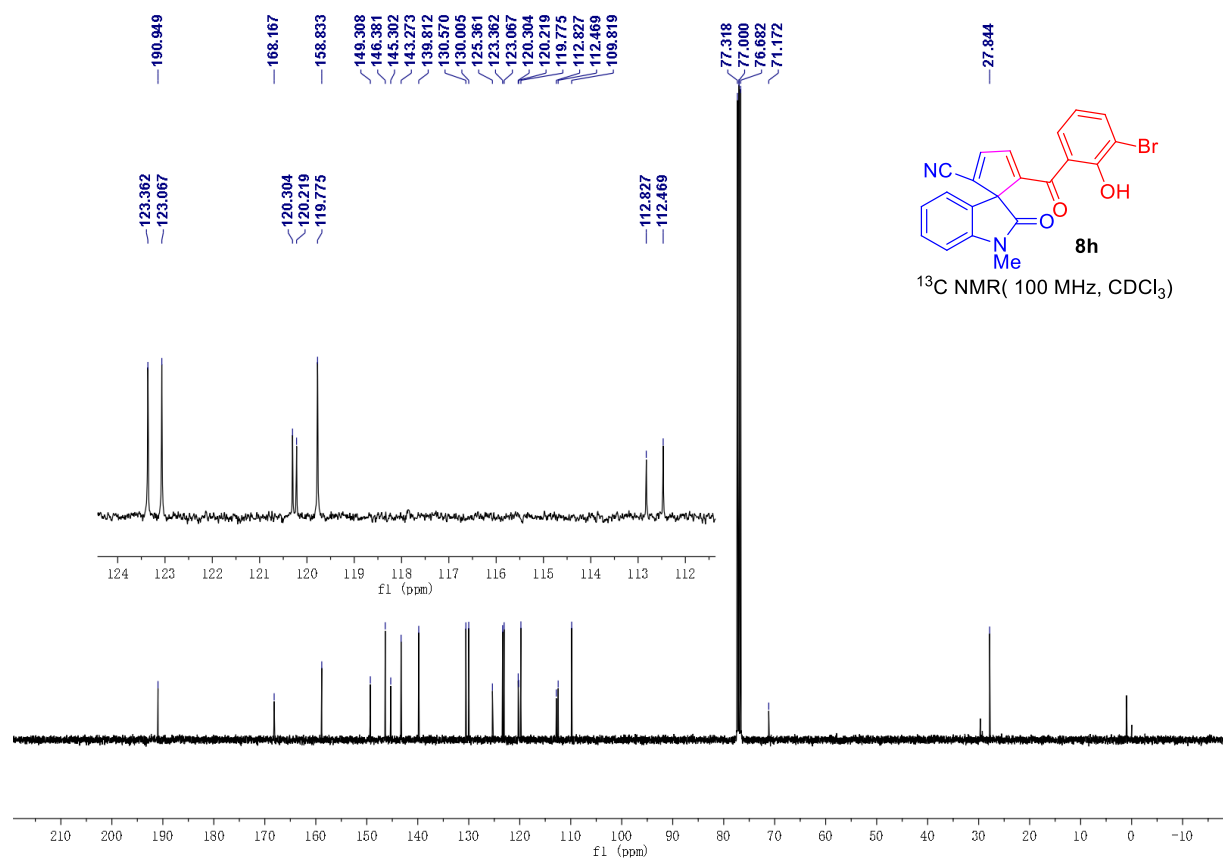

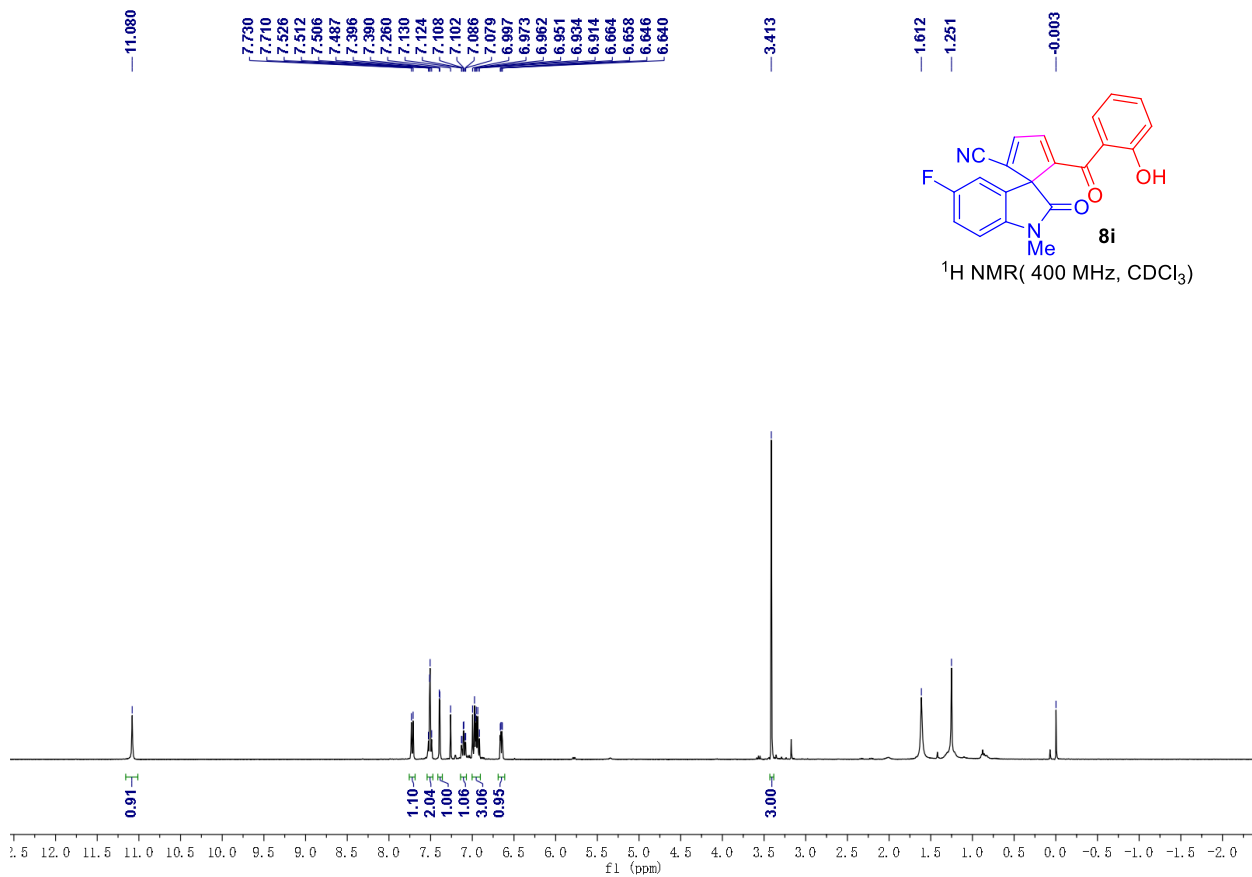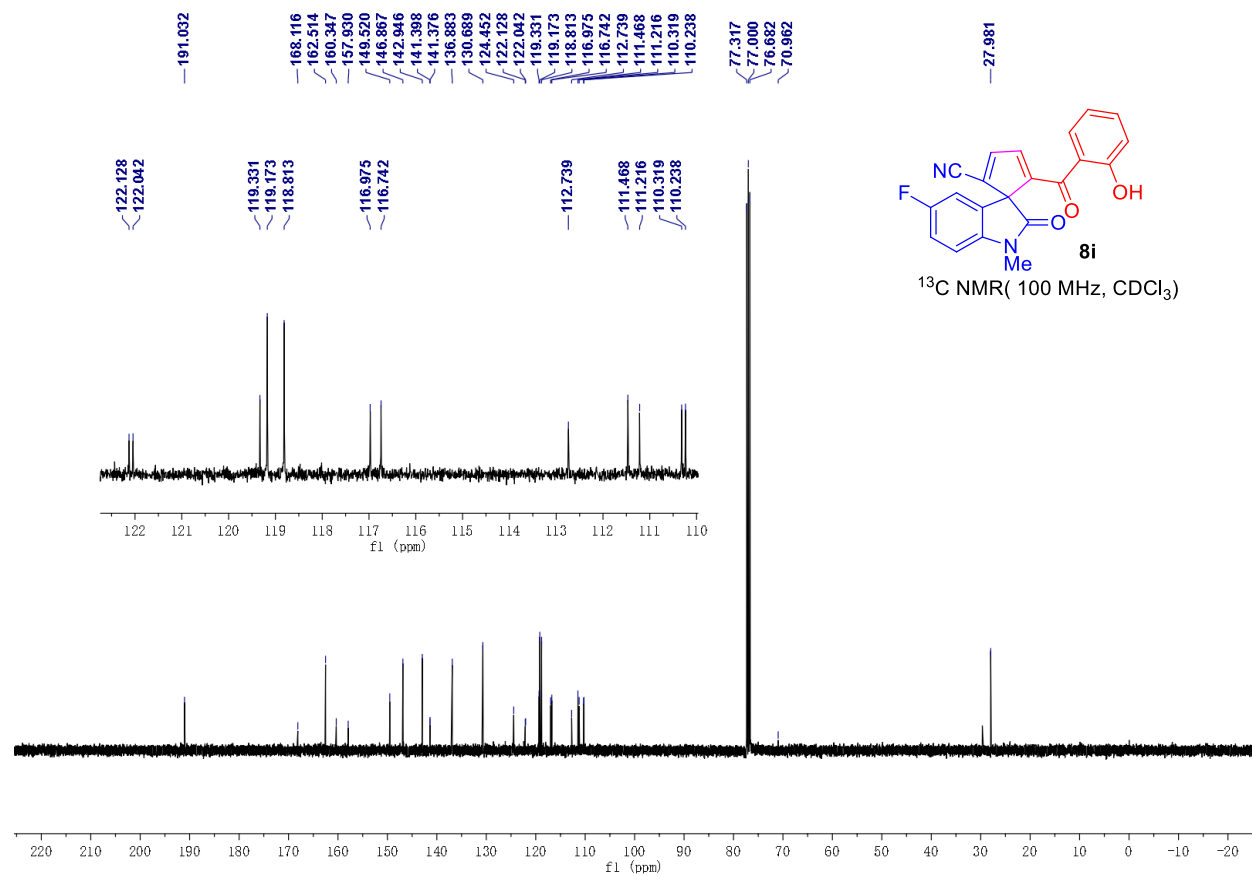

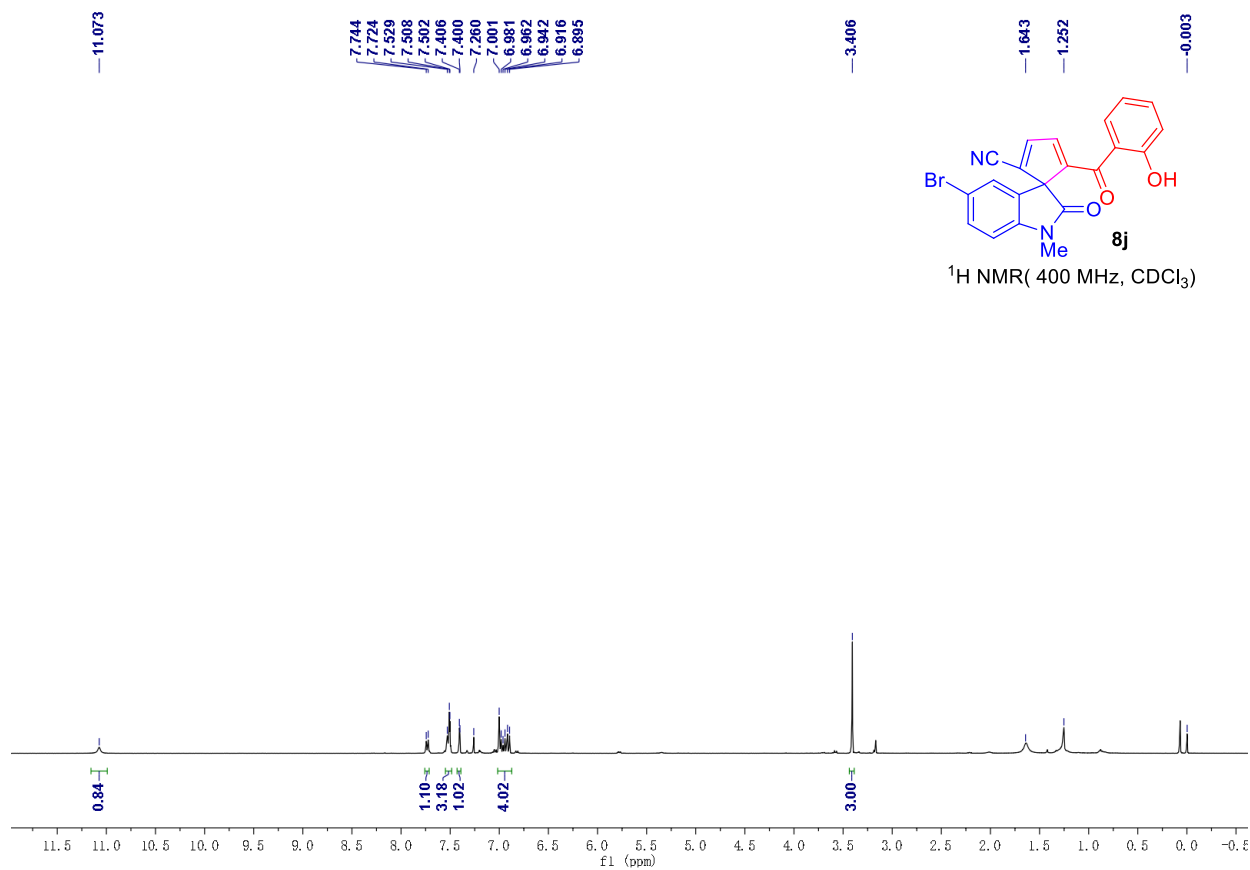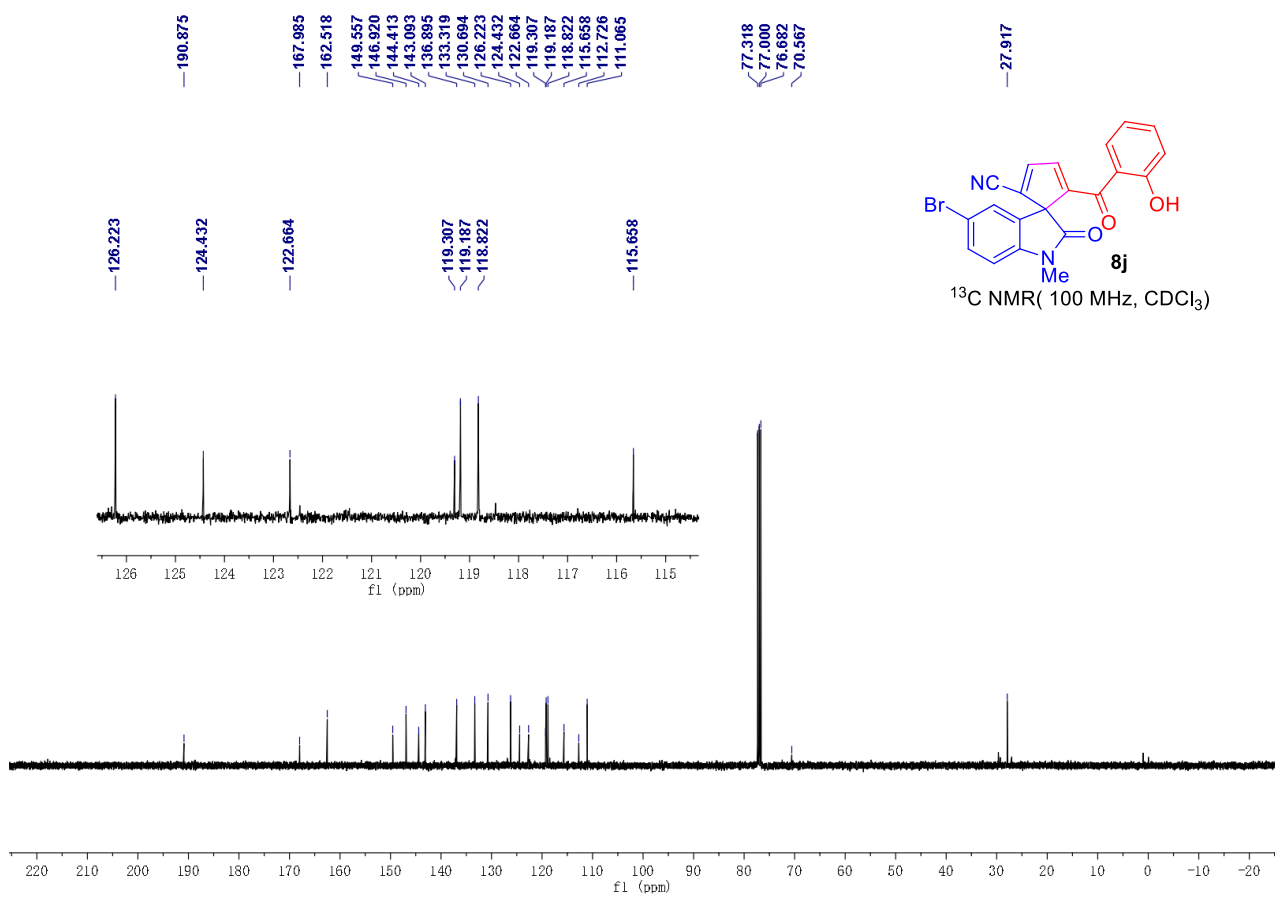

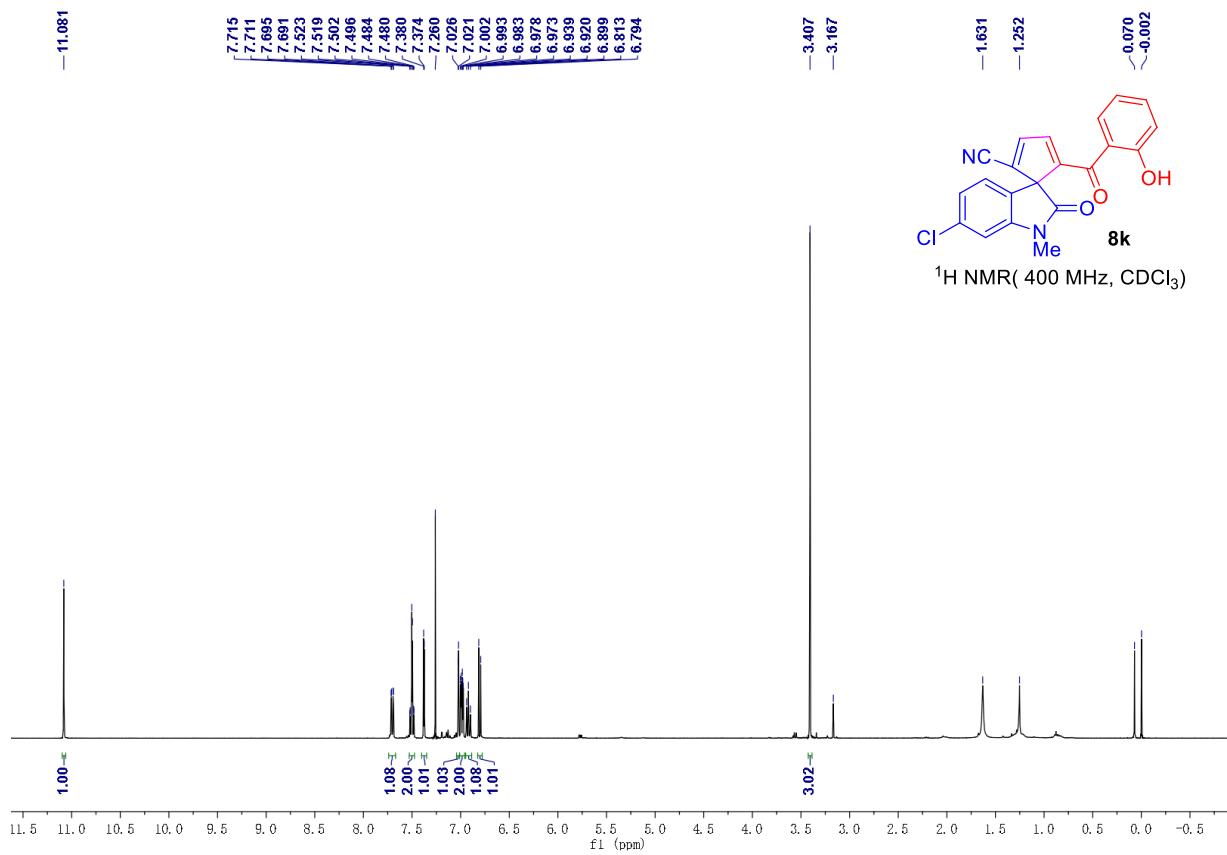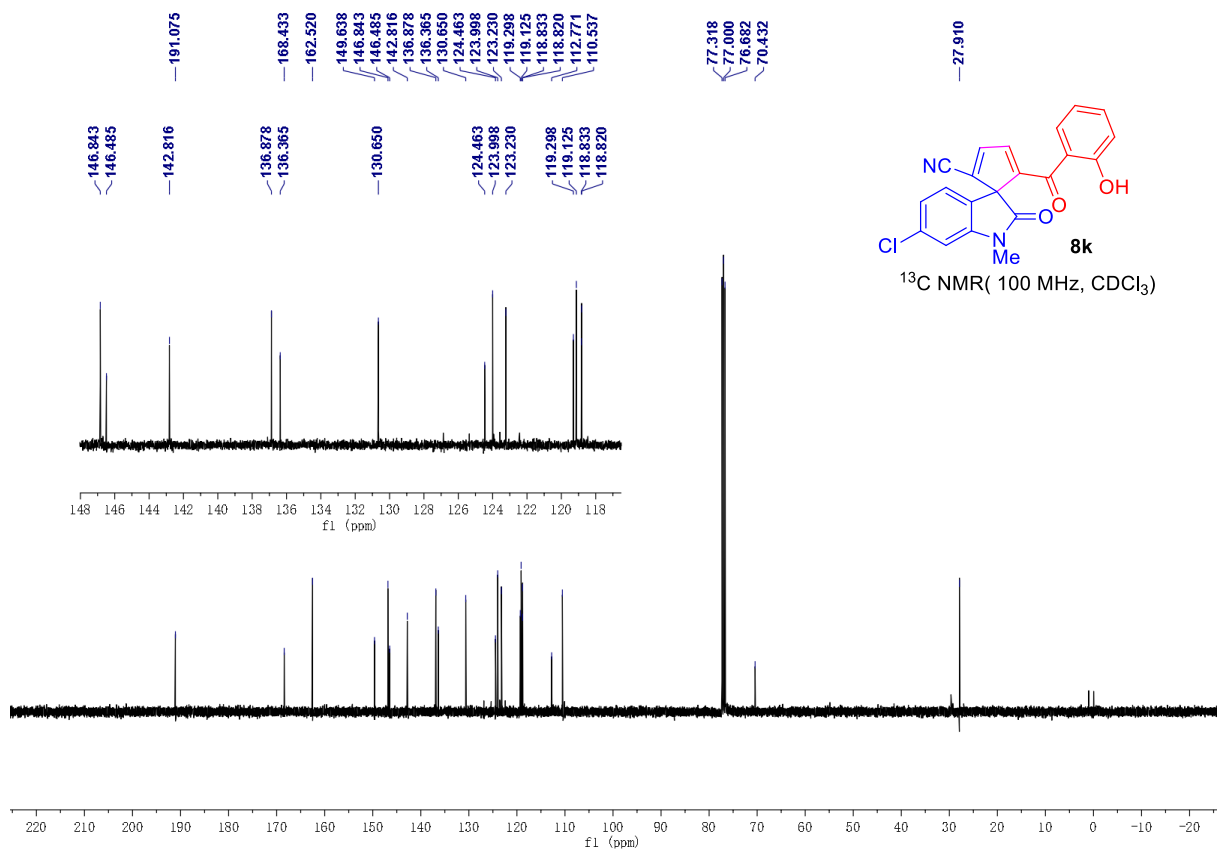

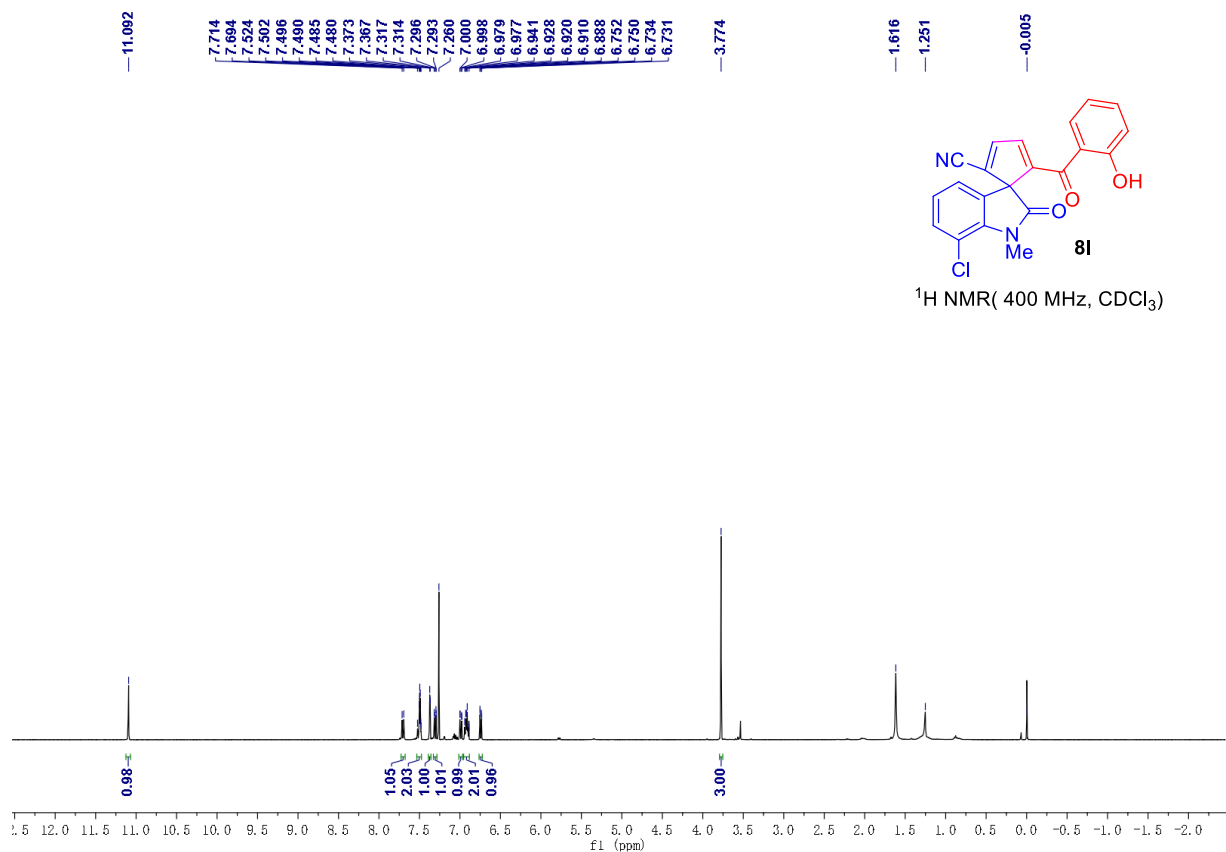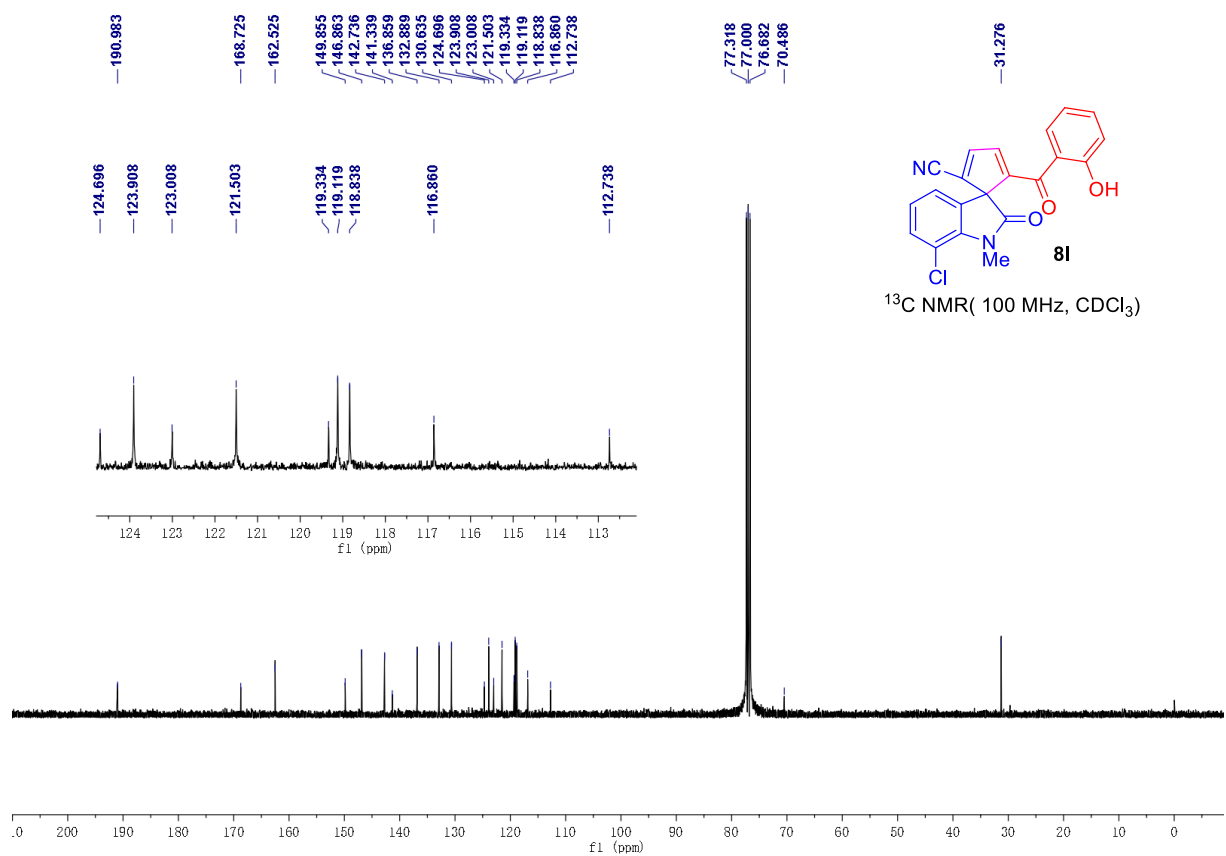

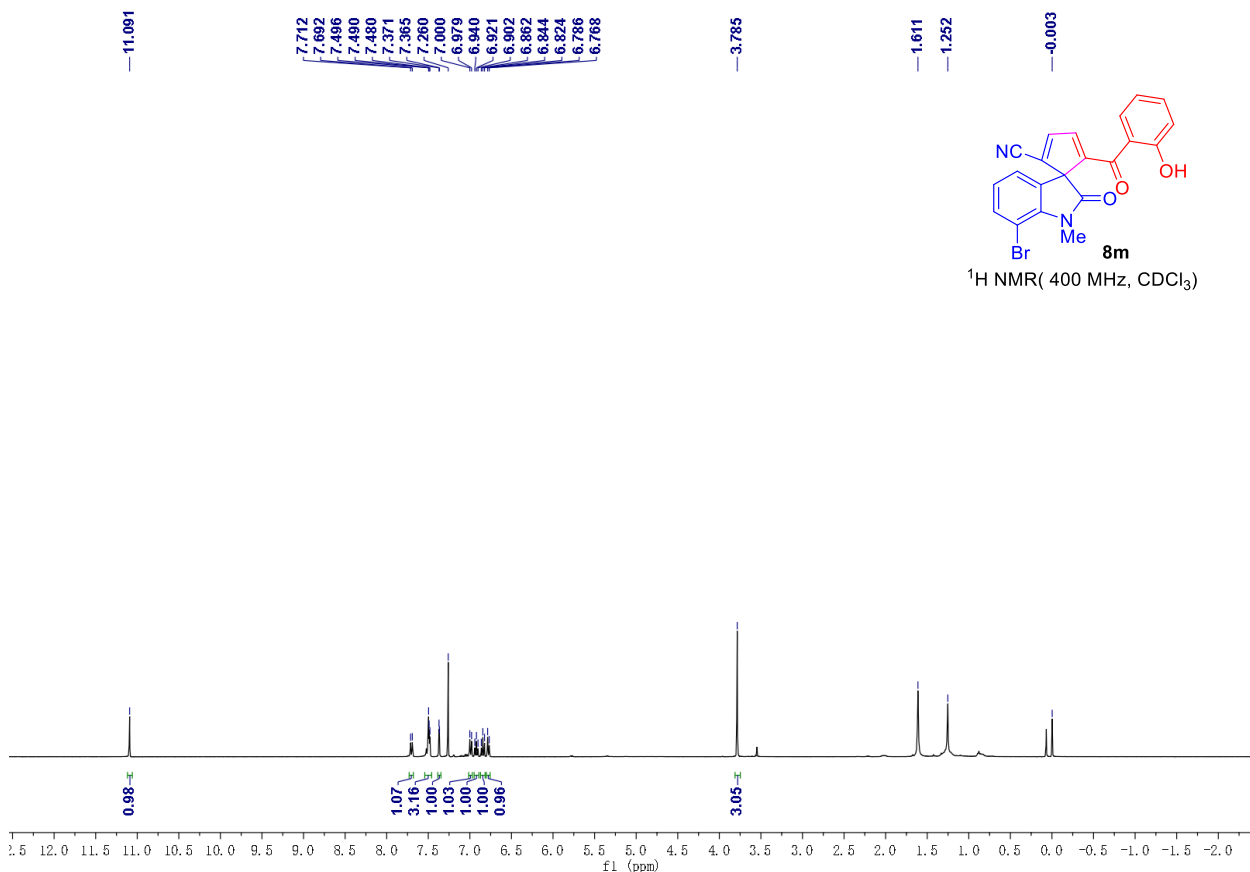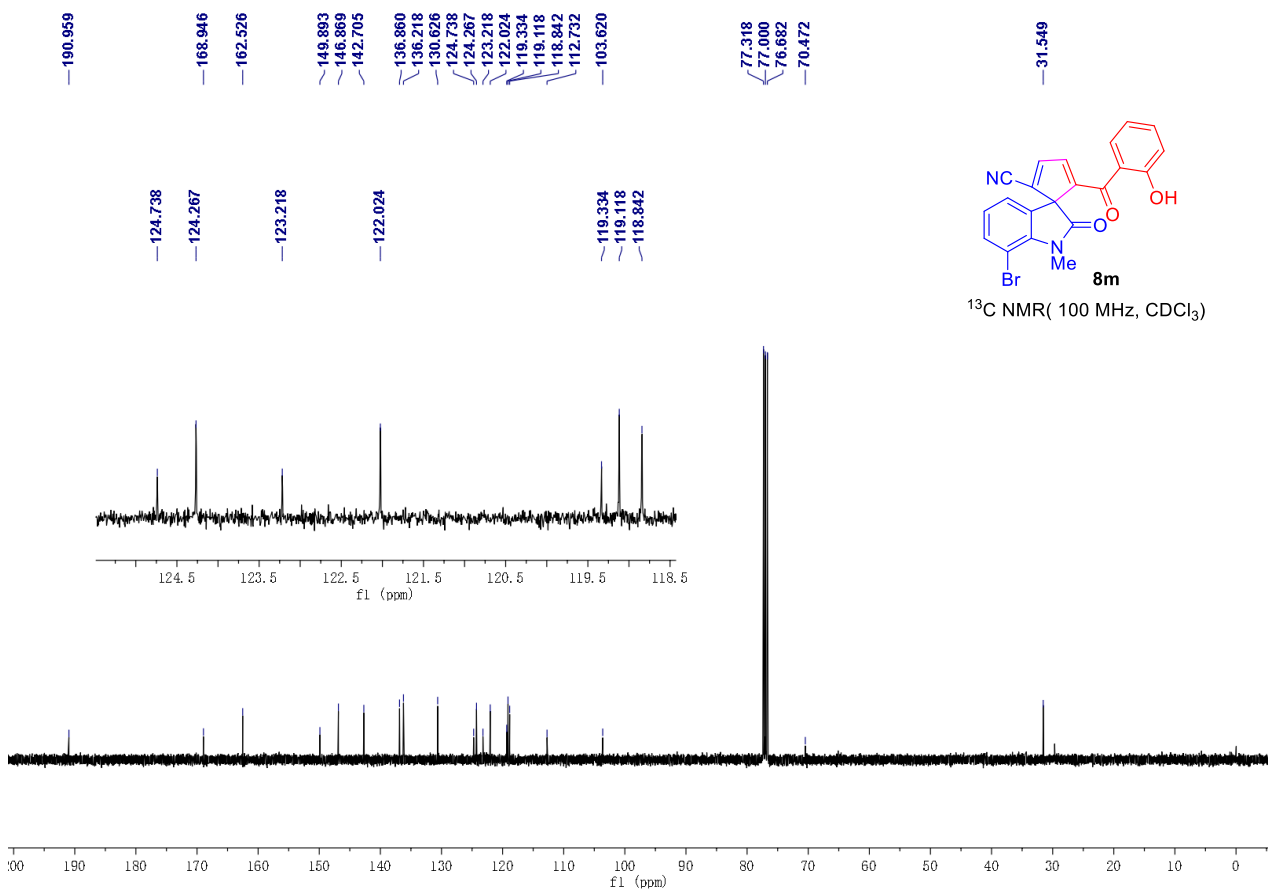



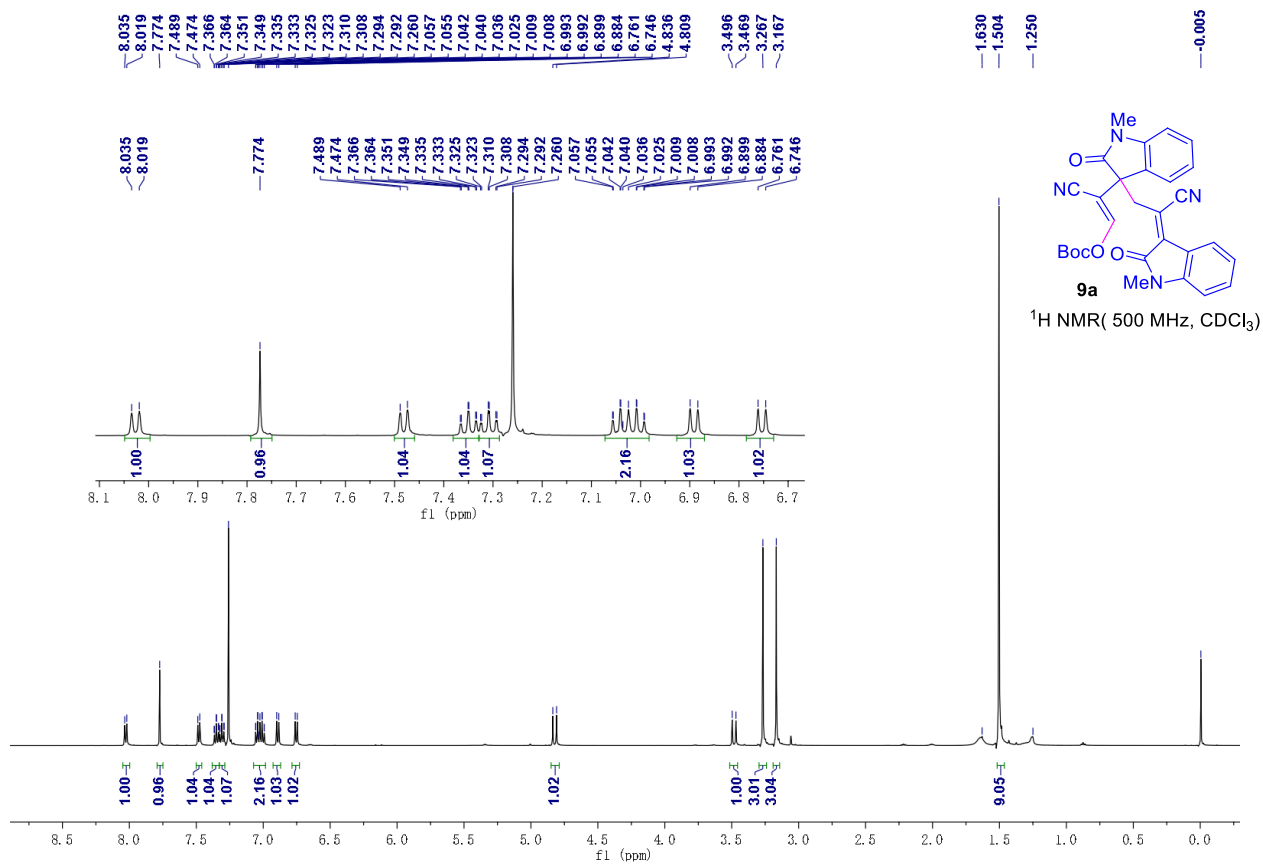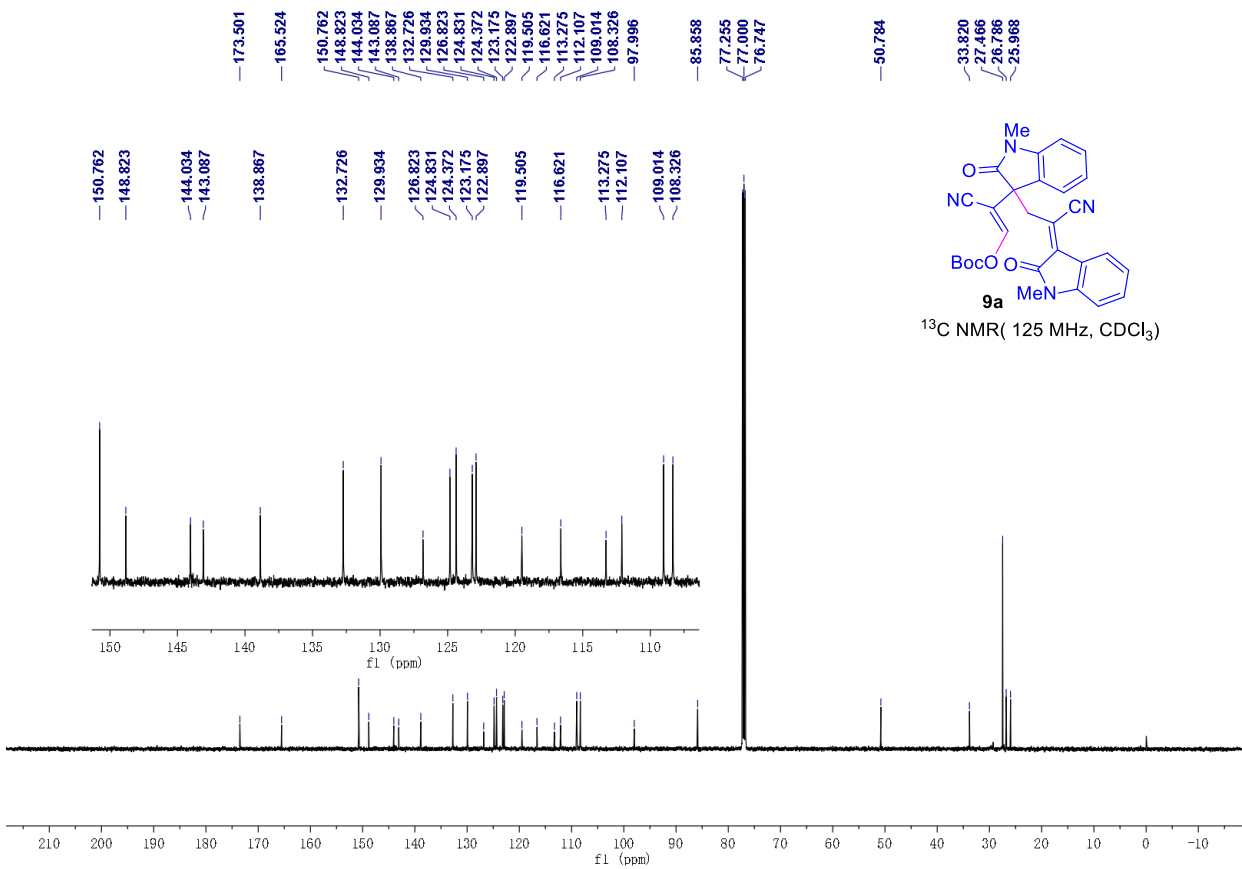

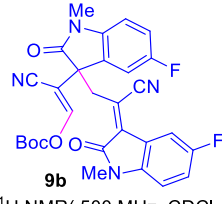

<sup>1</sup>H NMR (500 MHz, CDCl<sub>3</sub>)

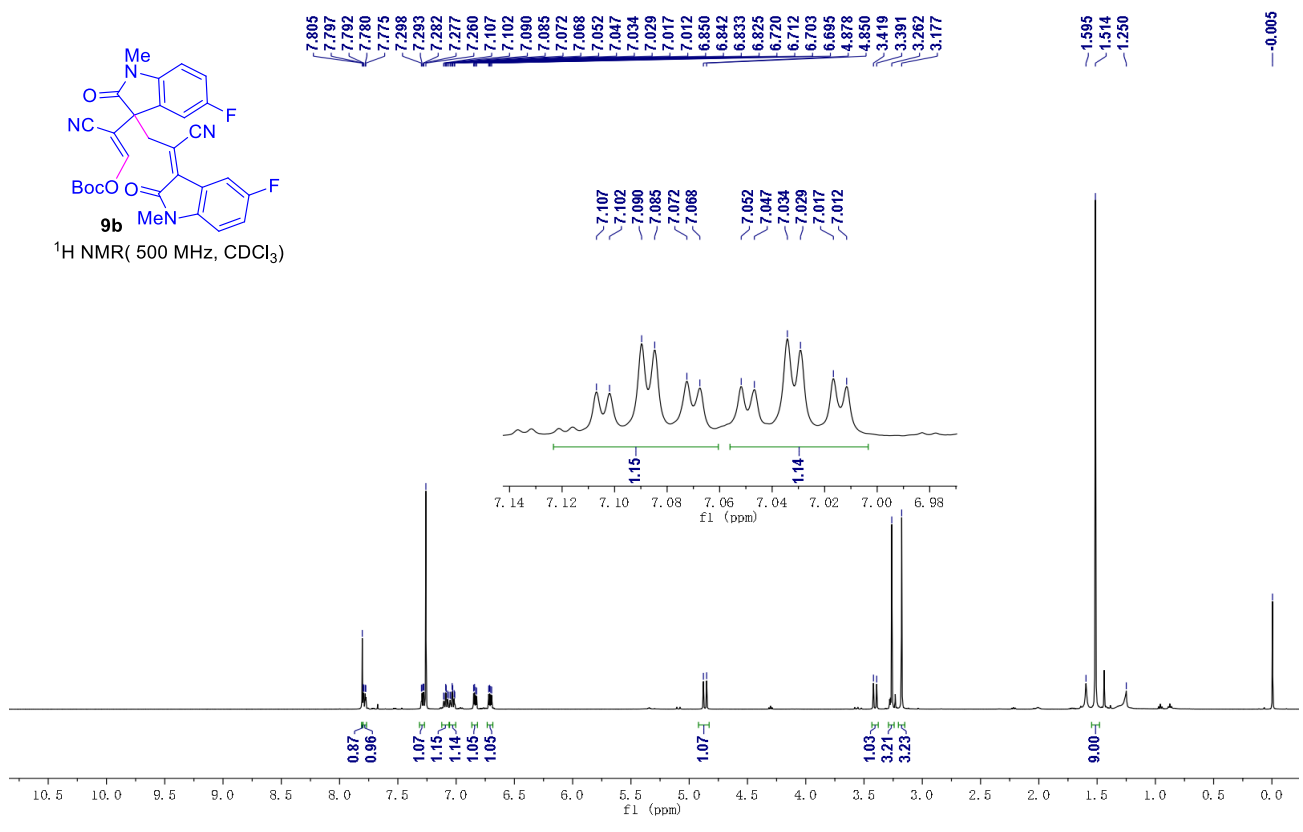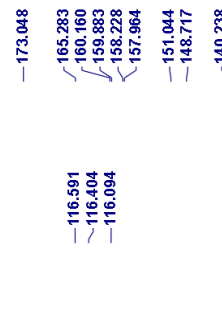

<sup>13</sup>C NMR (125 MHz, CDCl<sub>3</sub>)

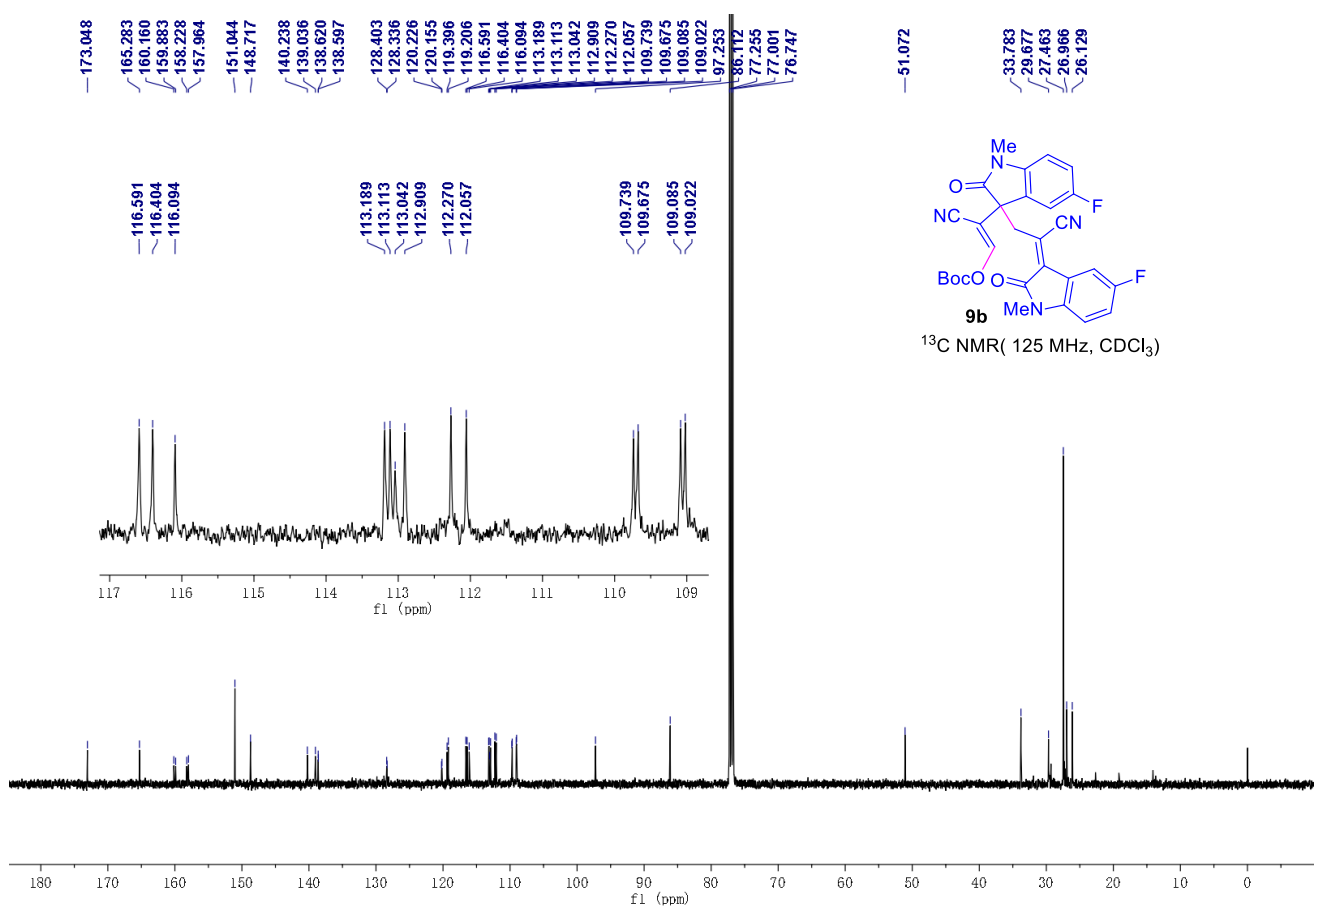

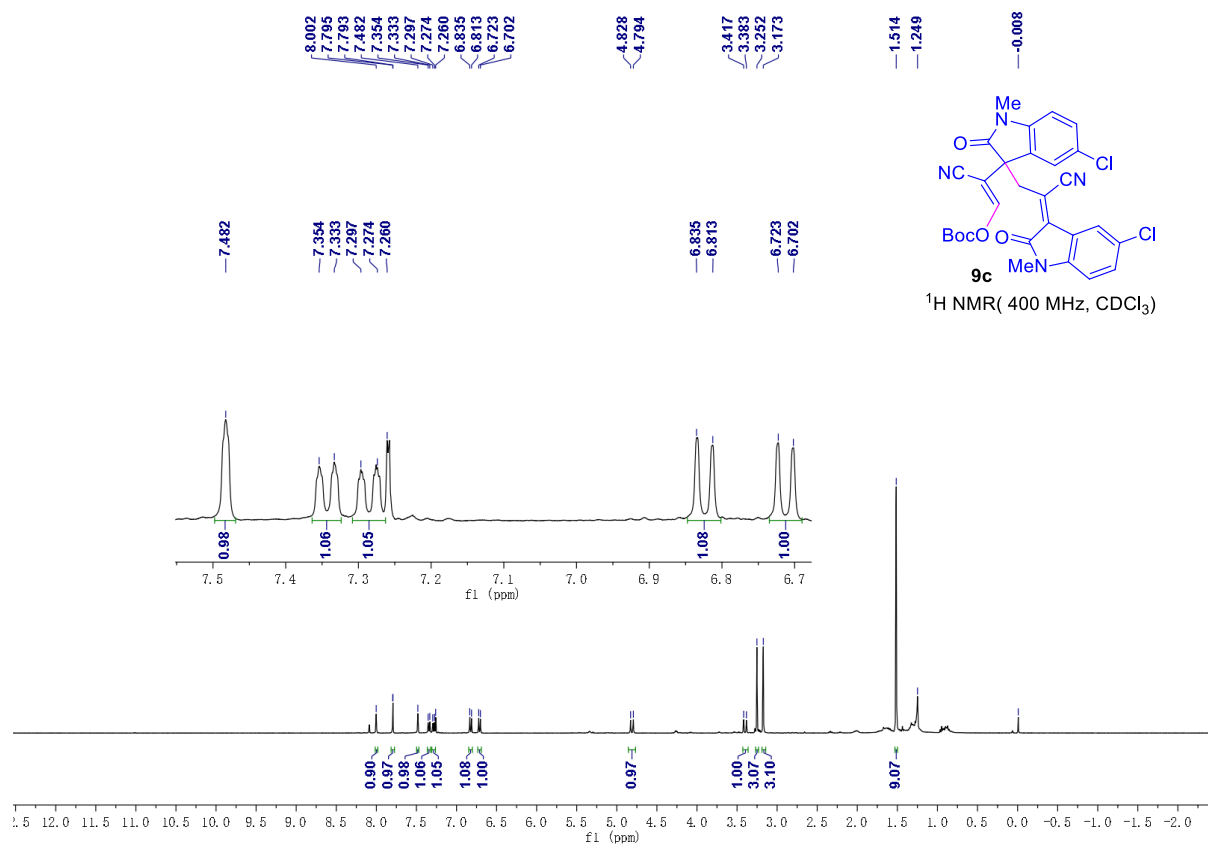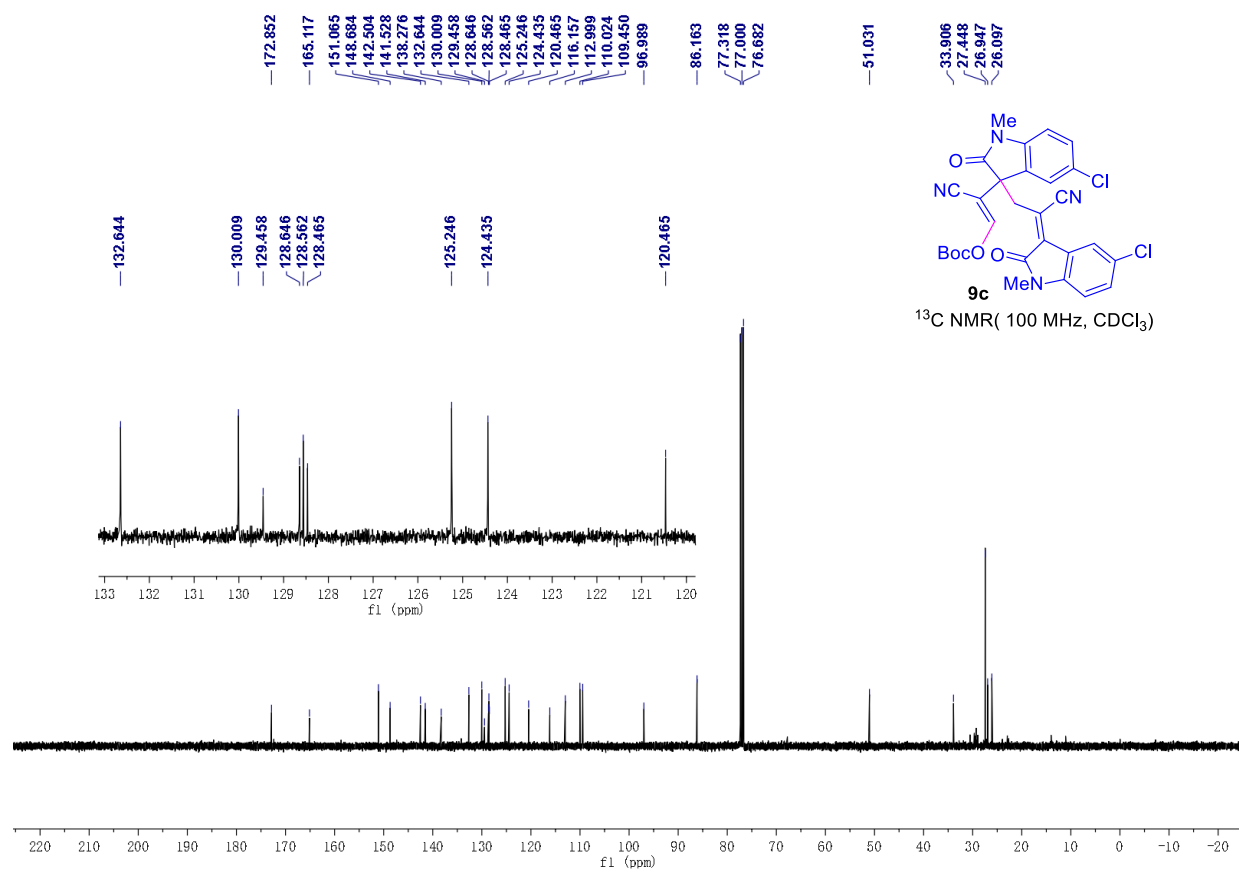

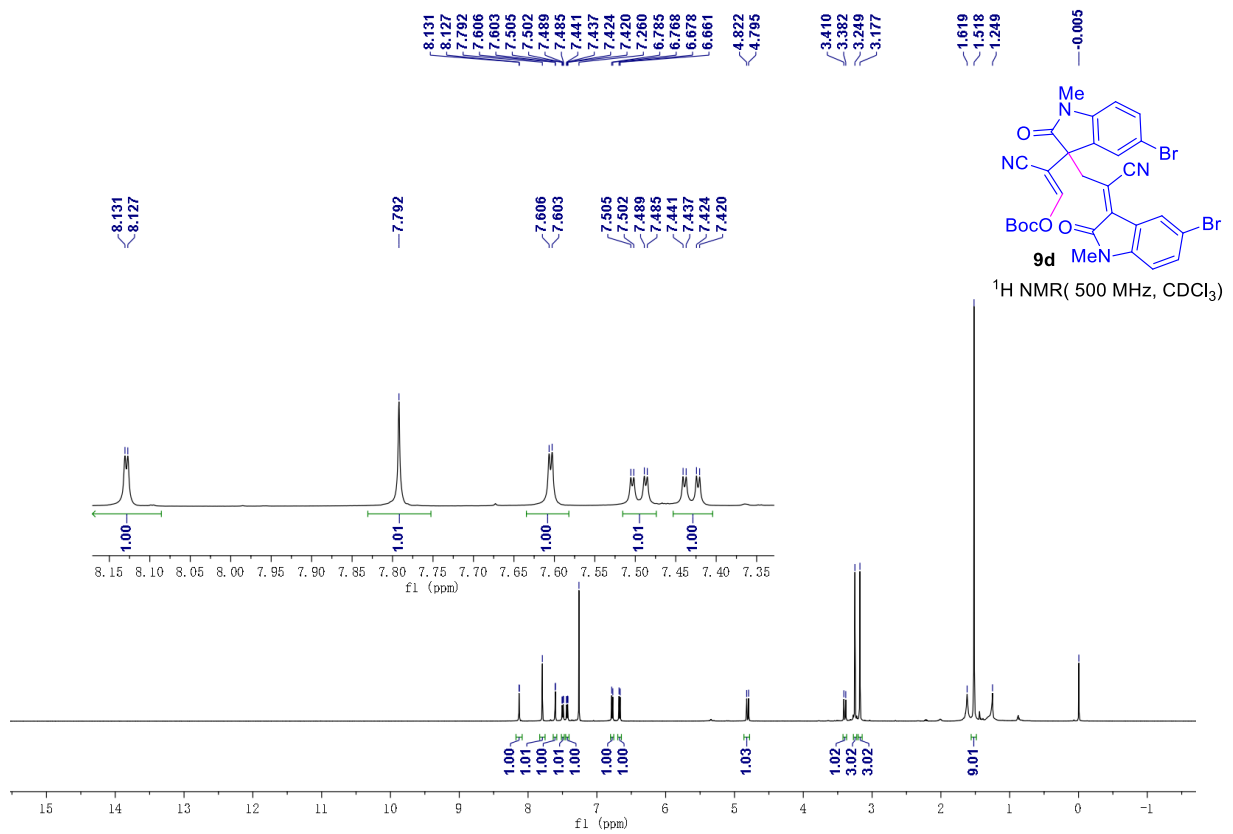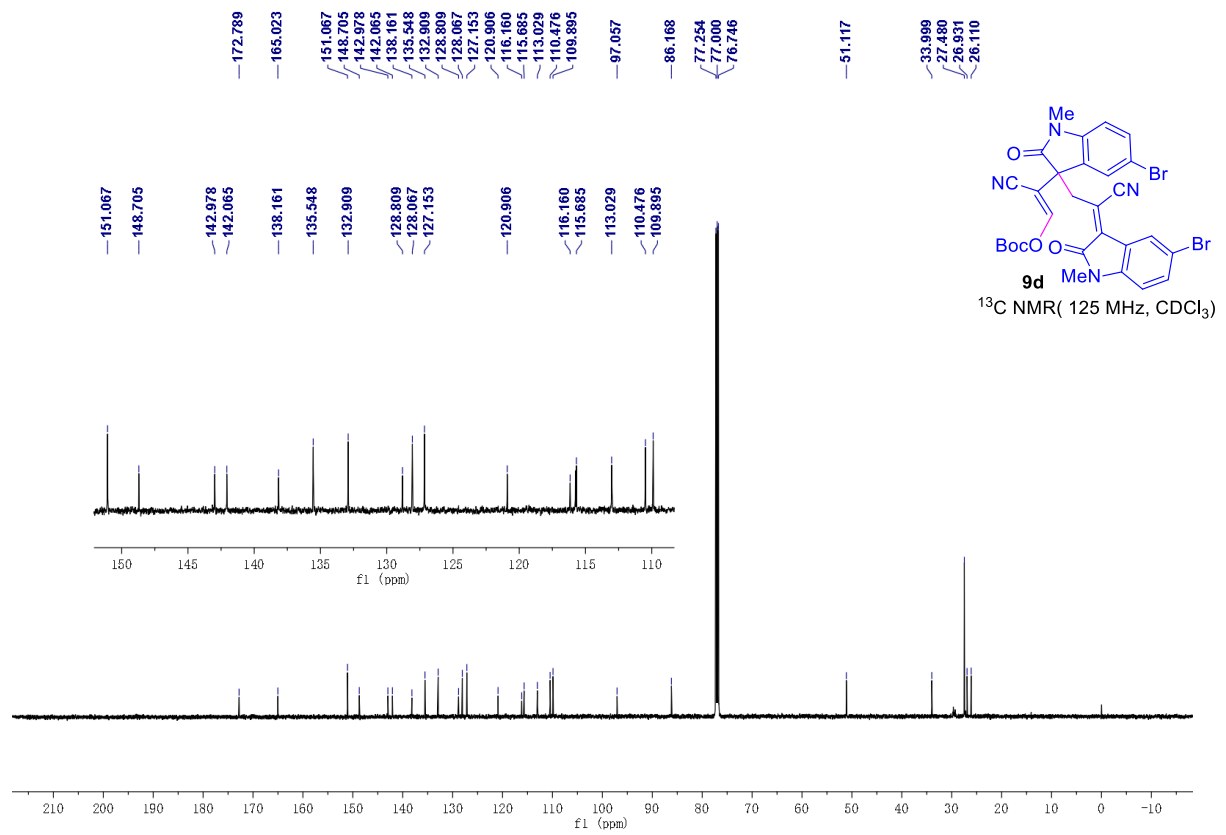

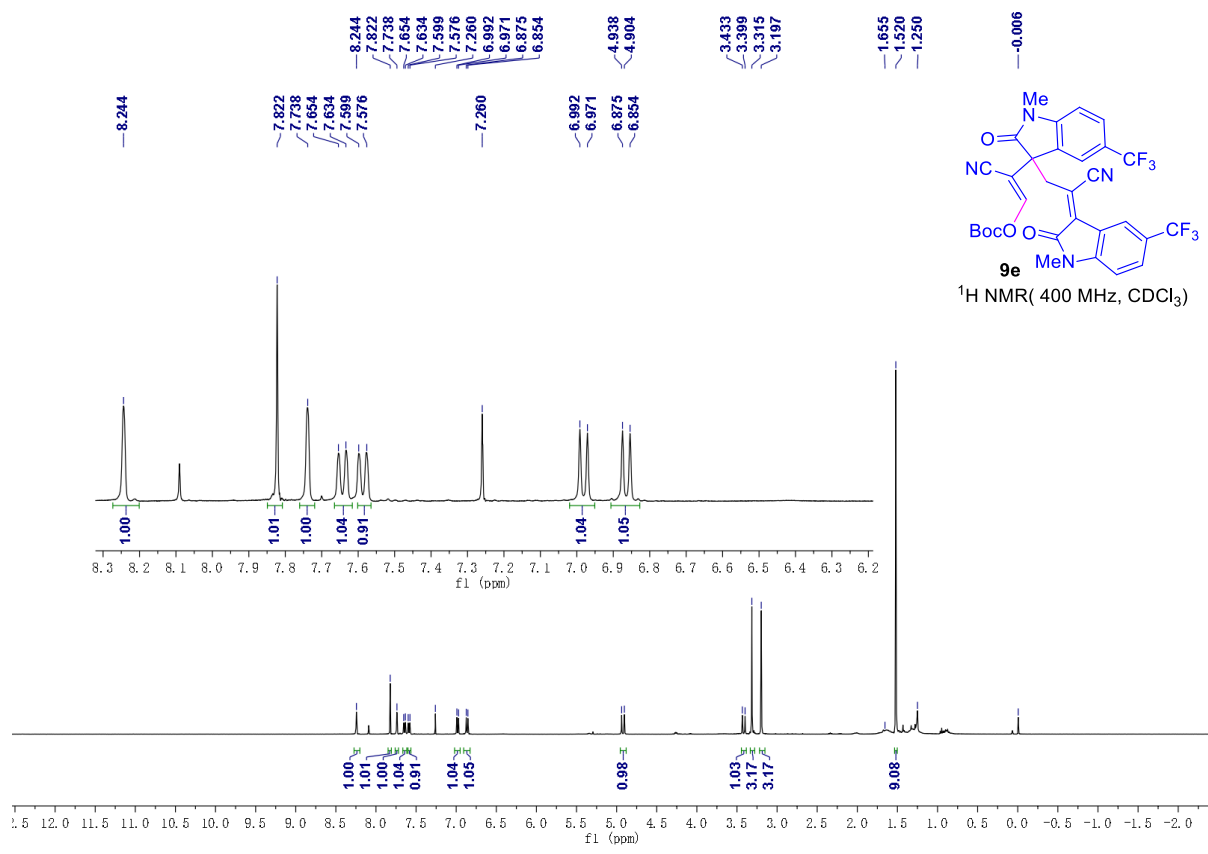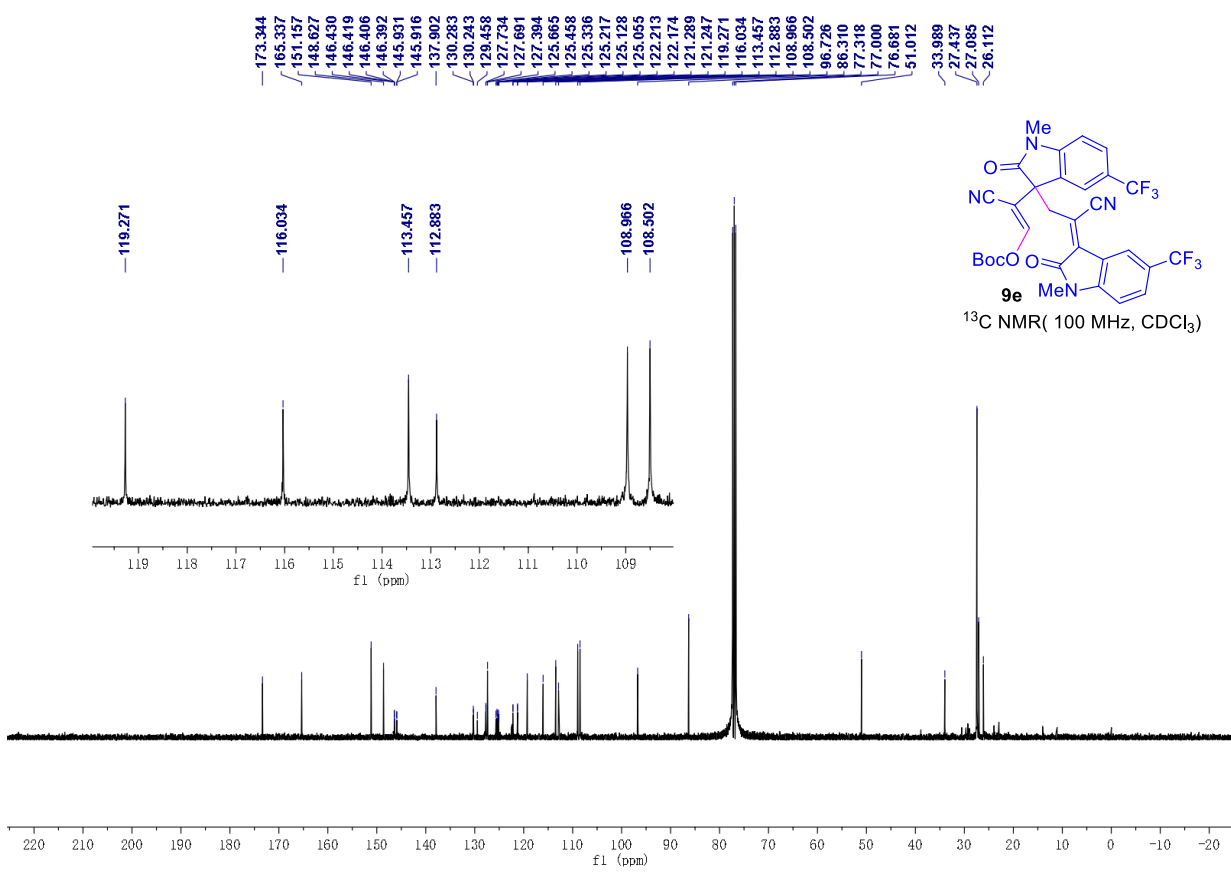

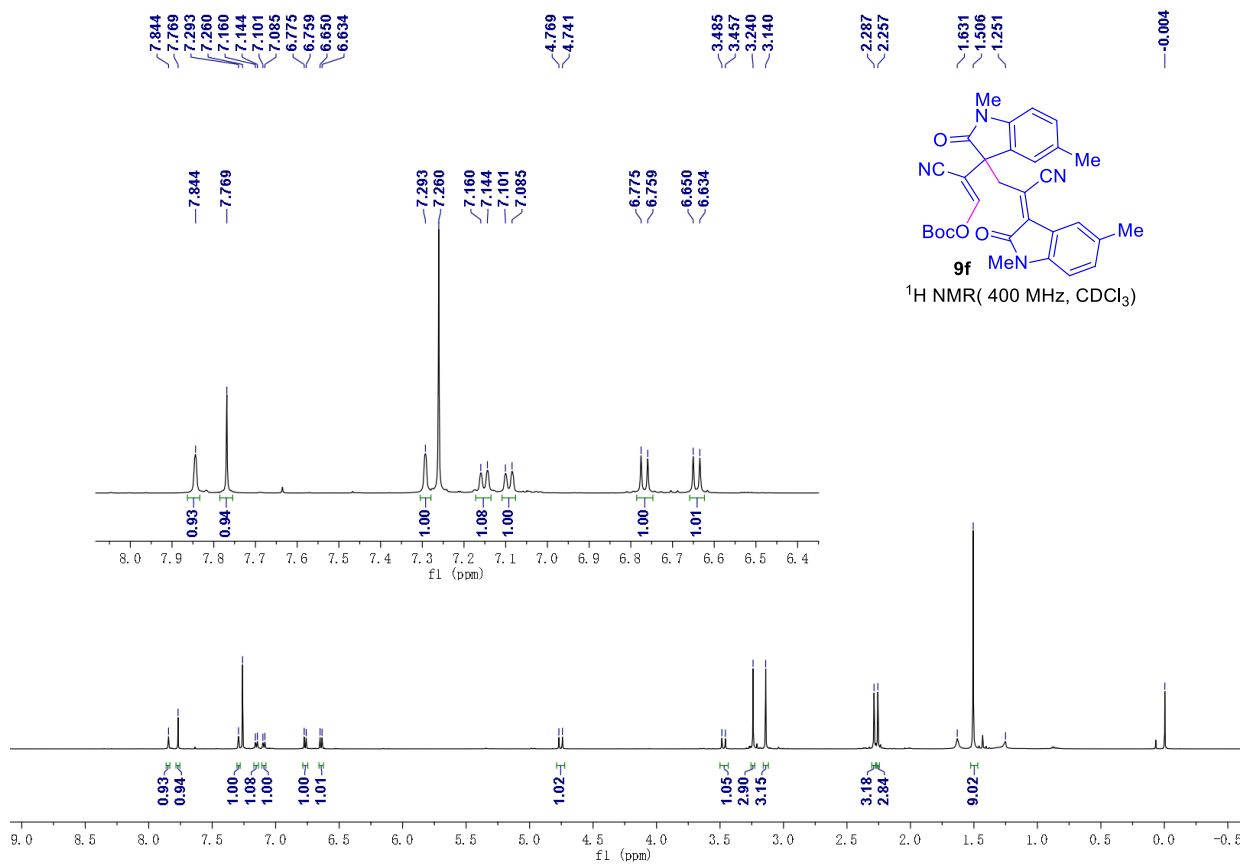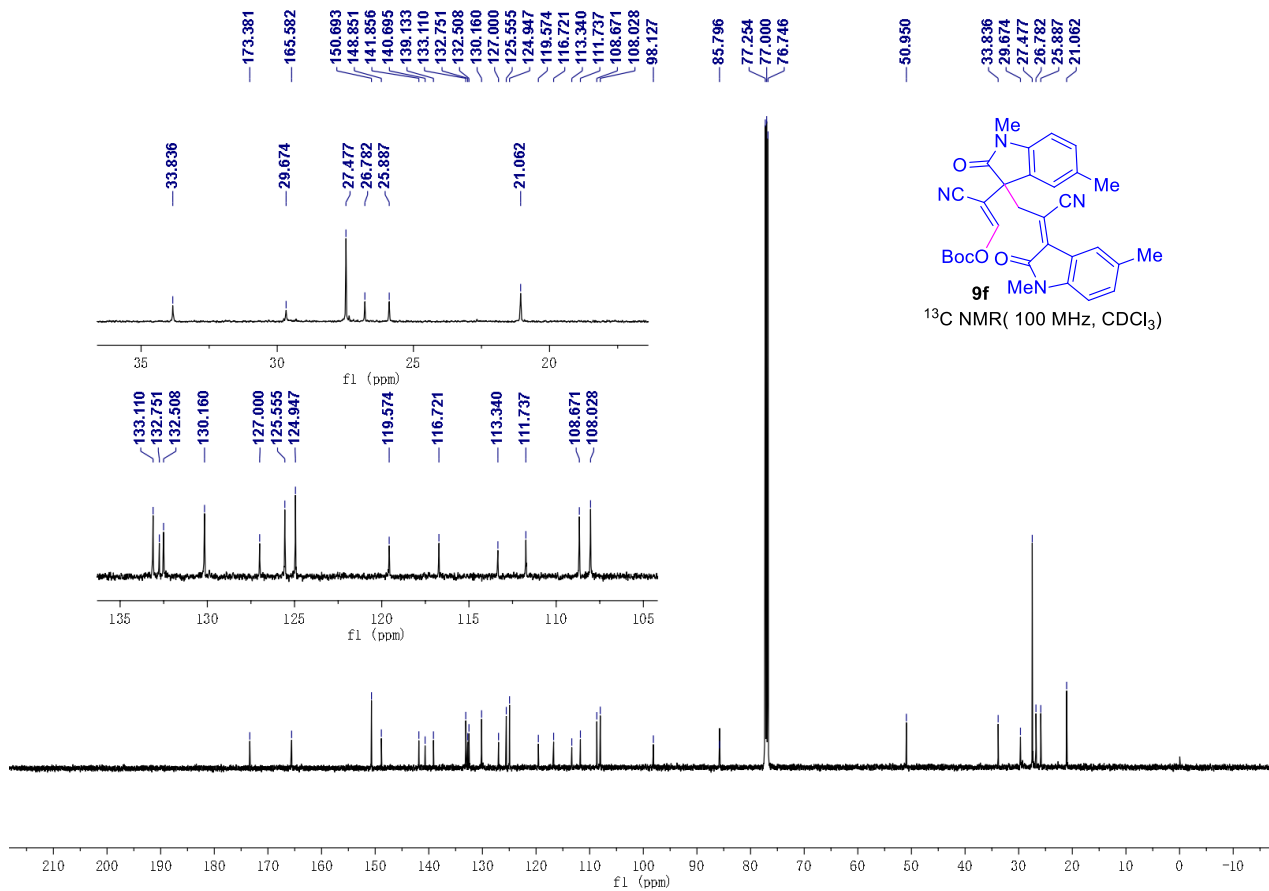

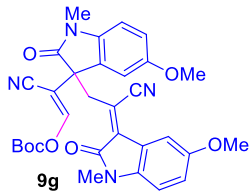

$^1\text{H NMR}$  (500 MHz,  $\text{CDCl}_3$ )

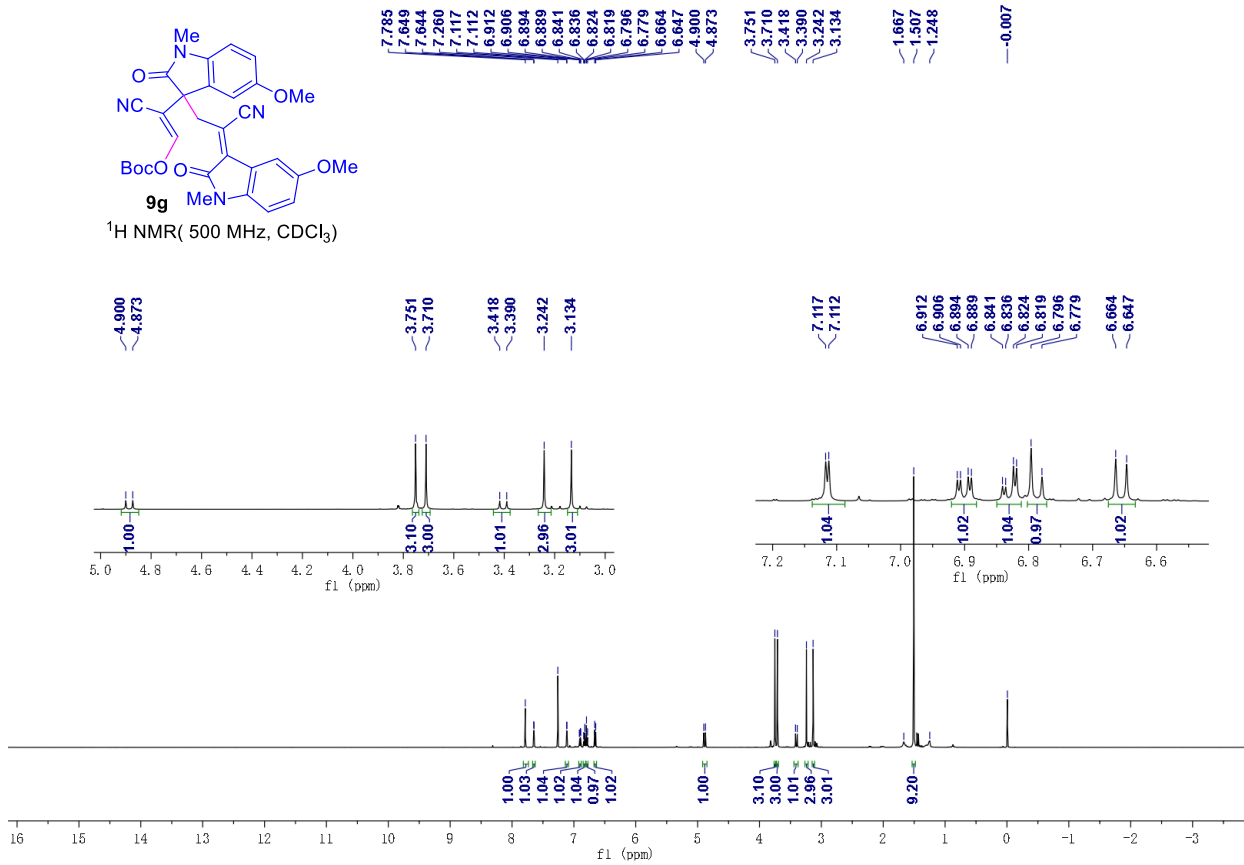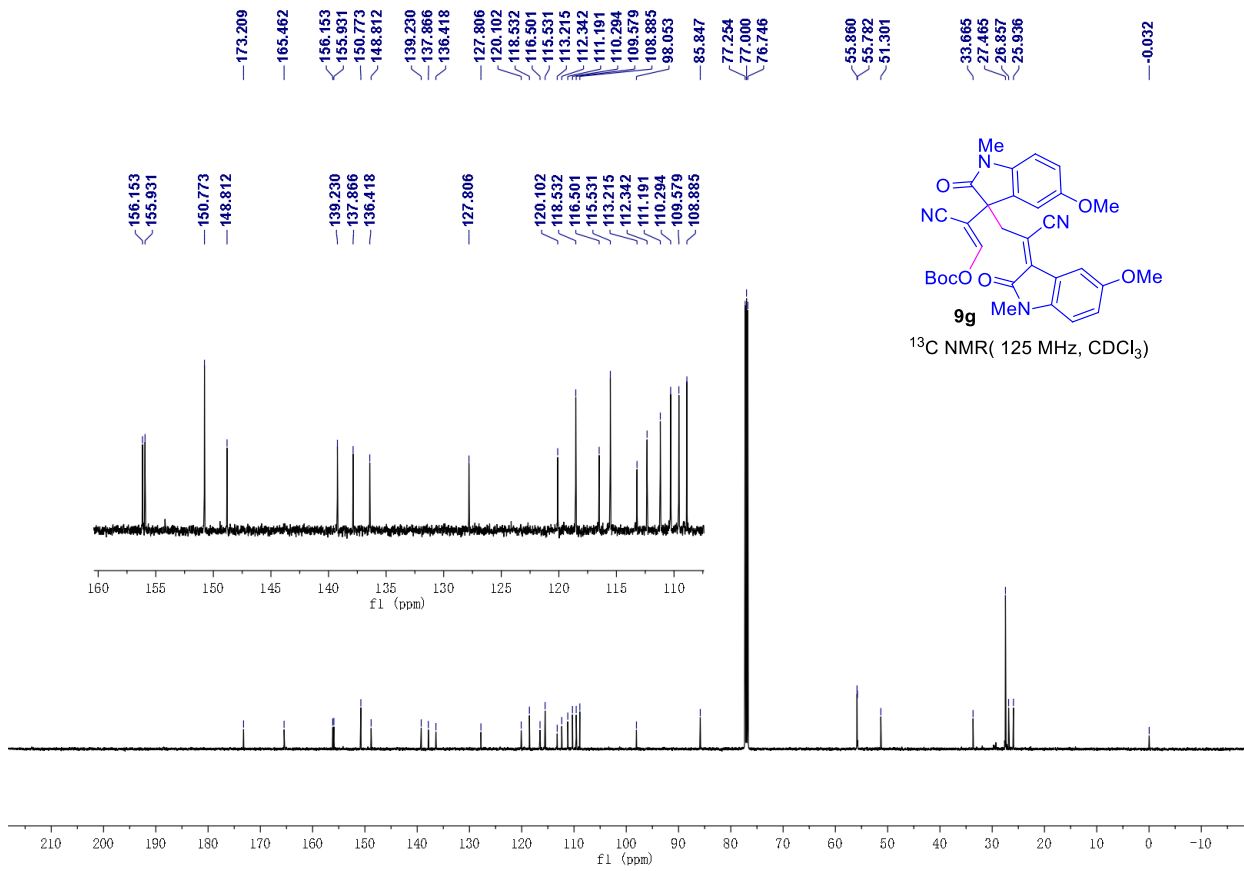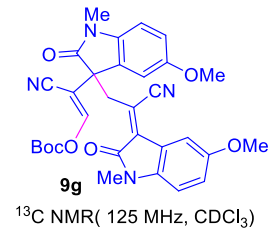

$^{13}\text{C NMR}$  (125 MHz,  $\text{CDCl}_3$ )

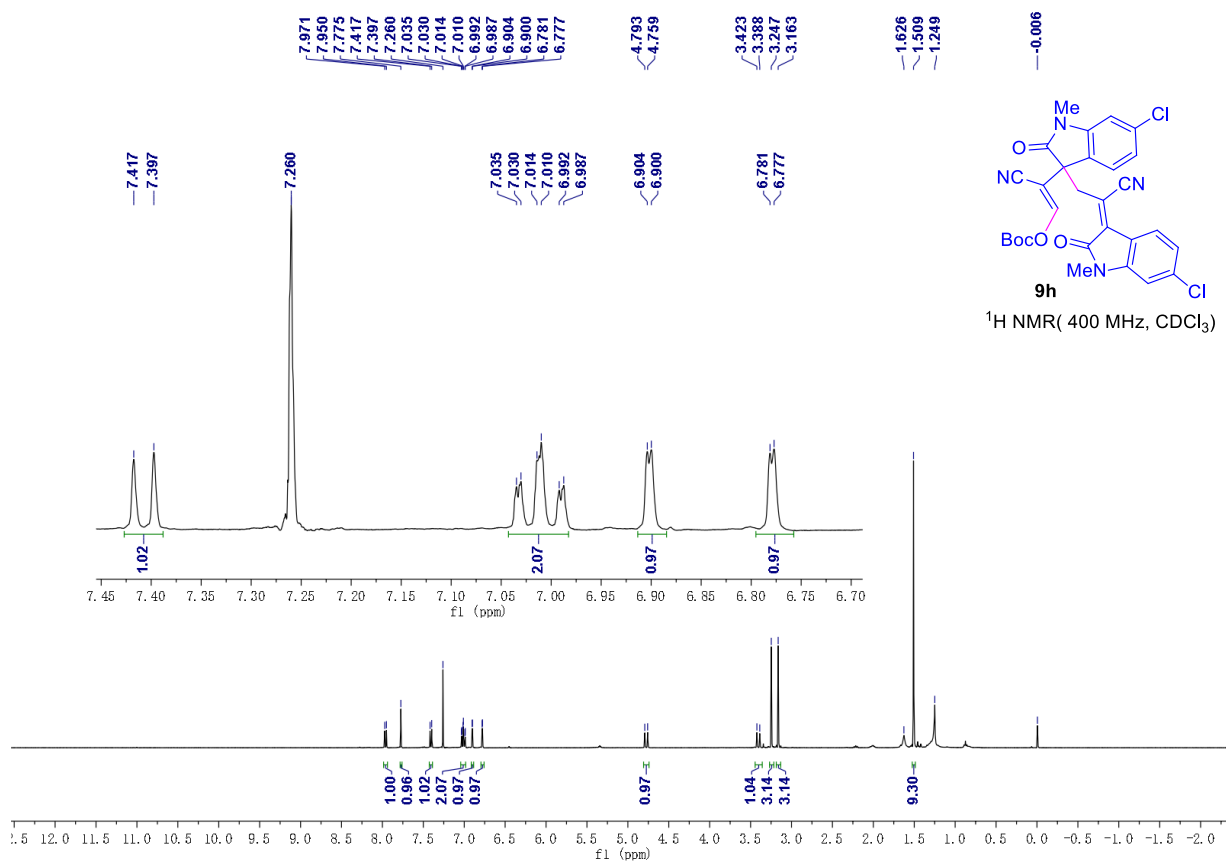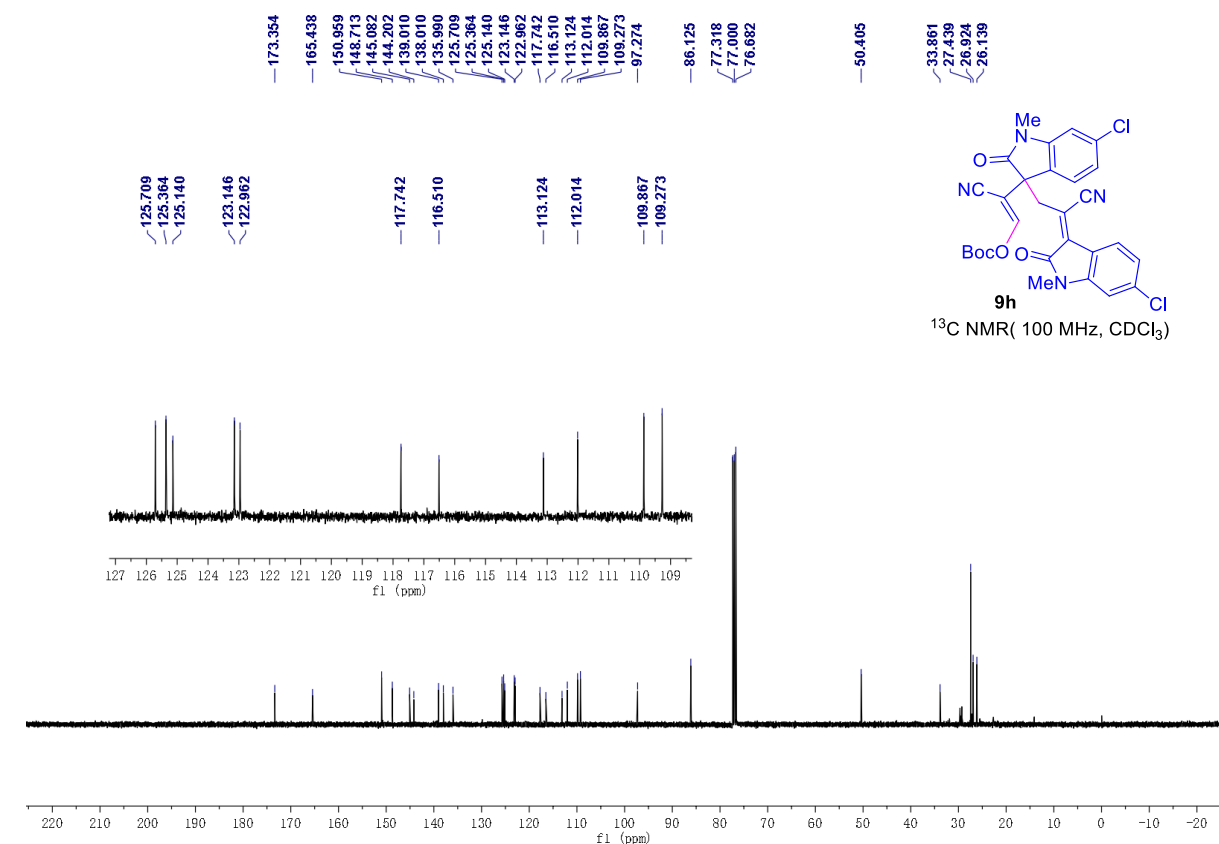



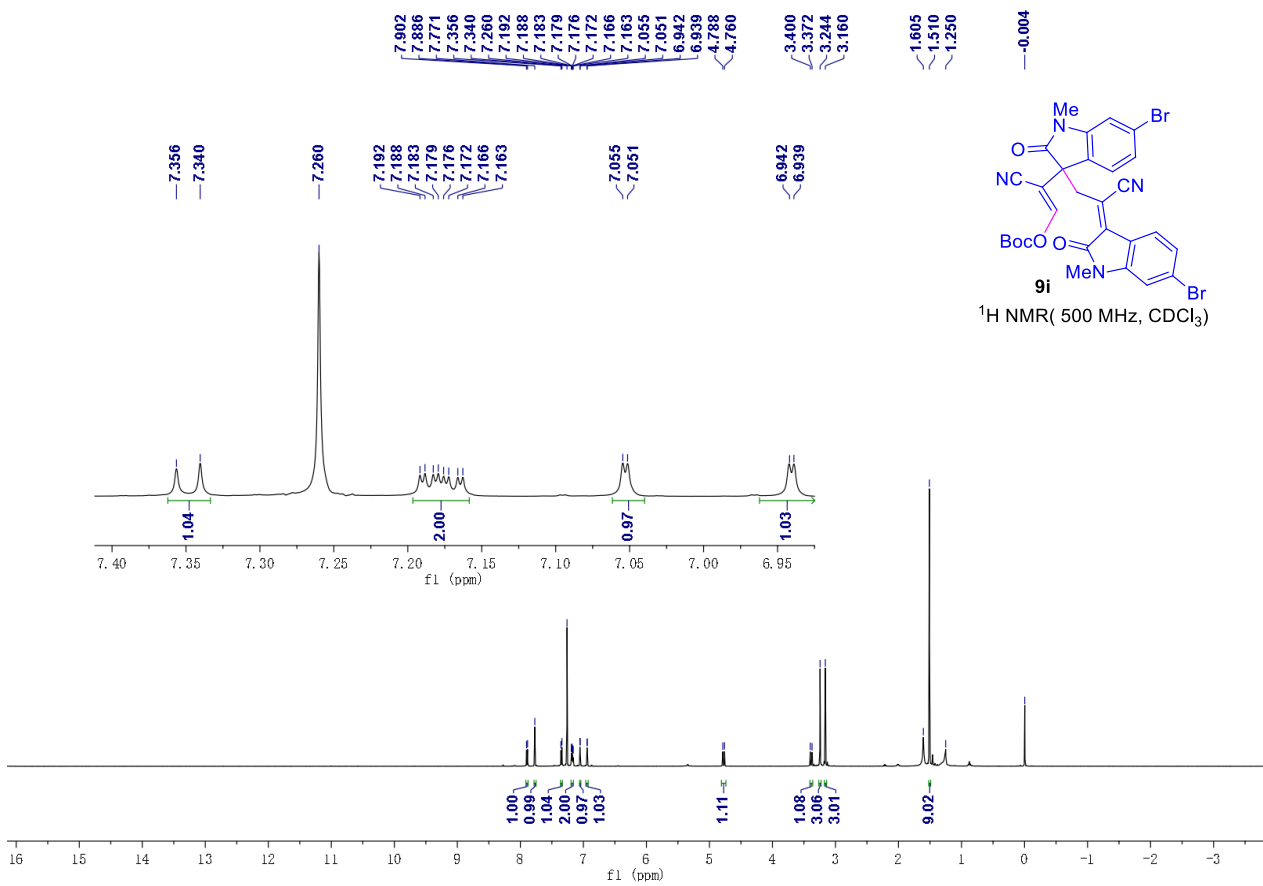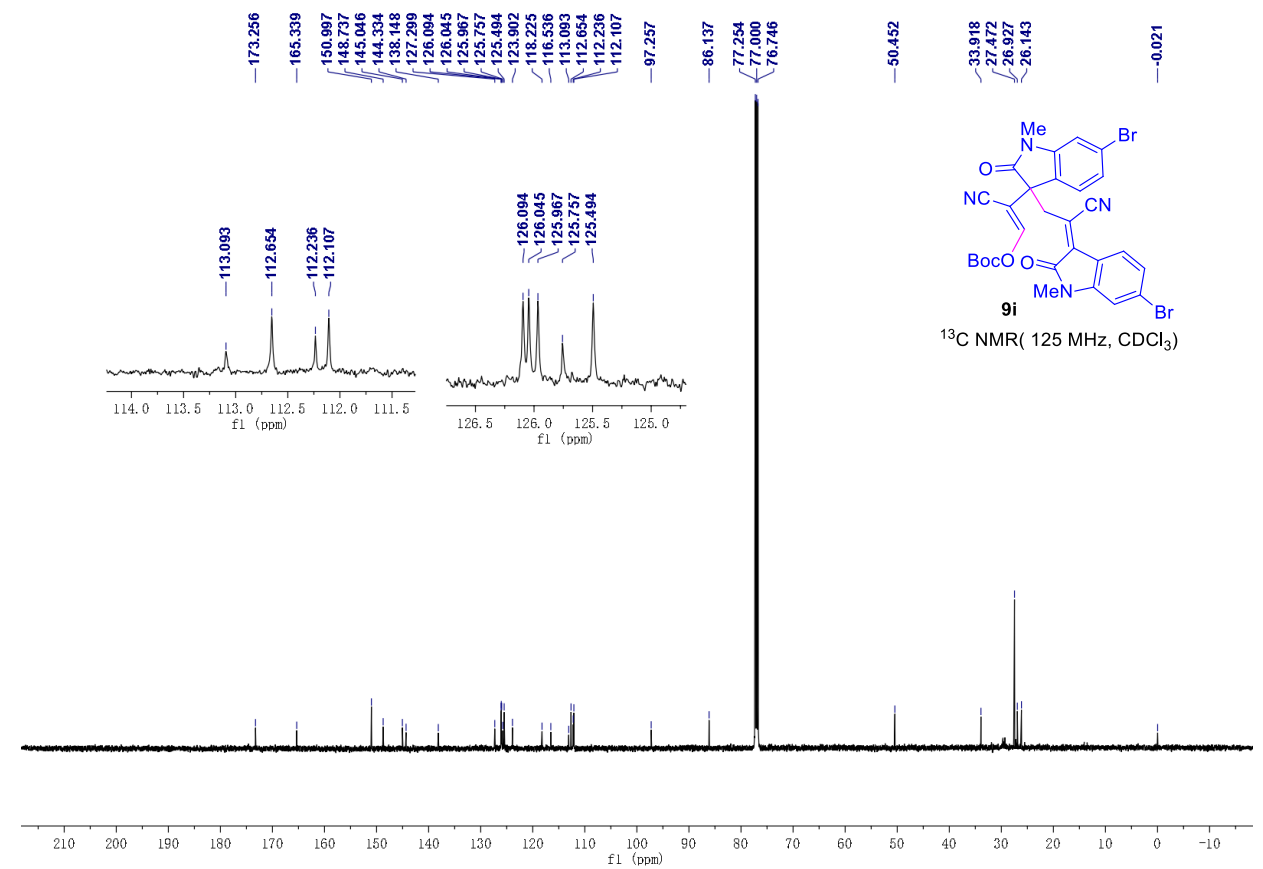

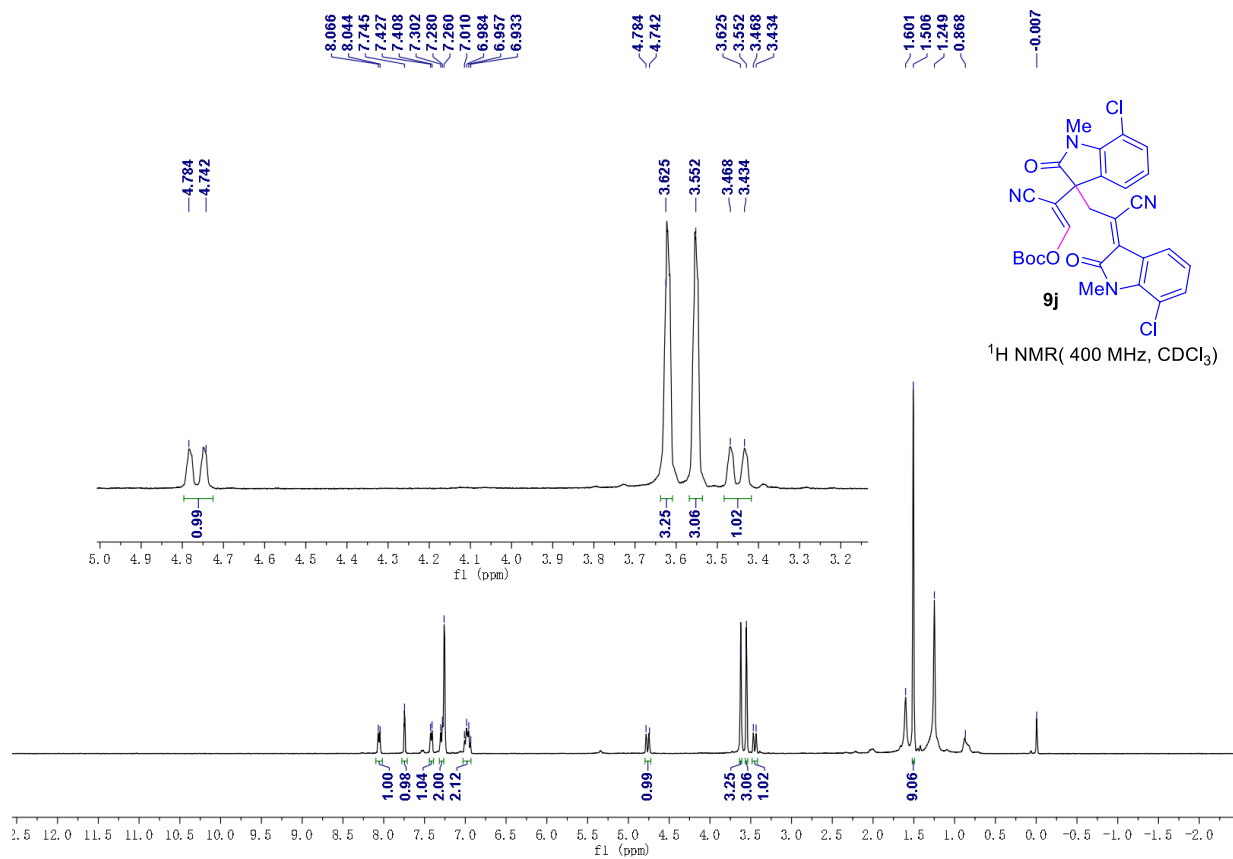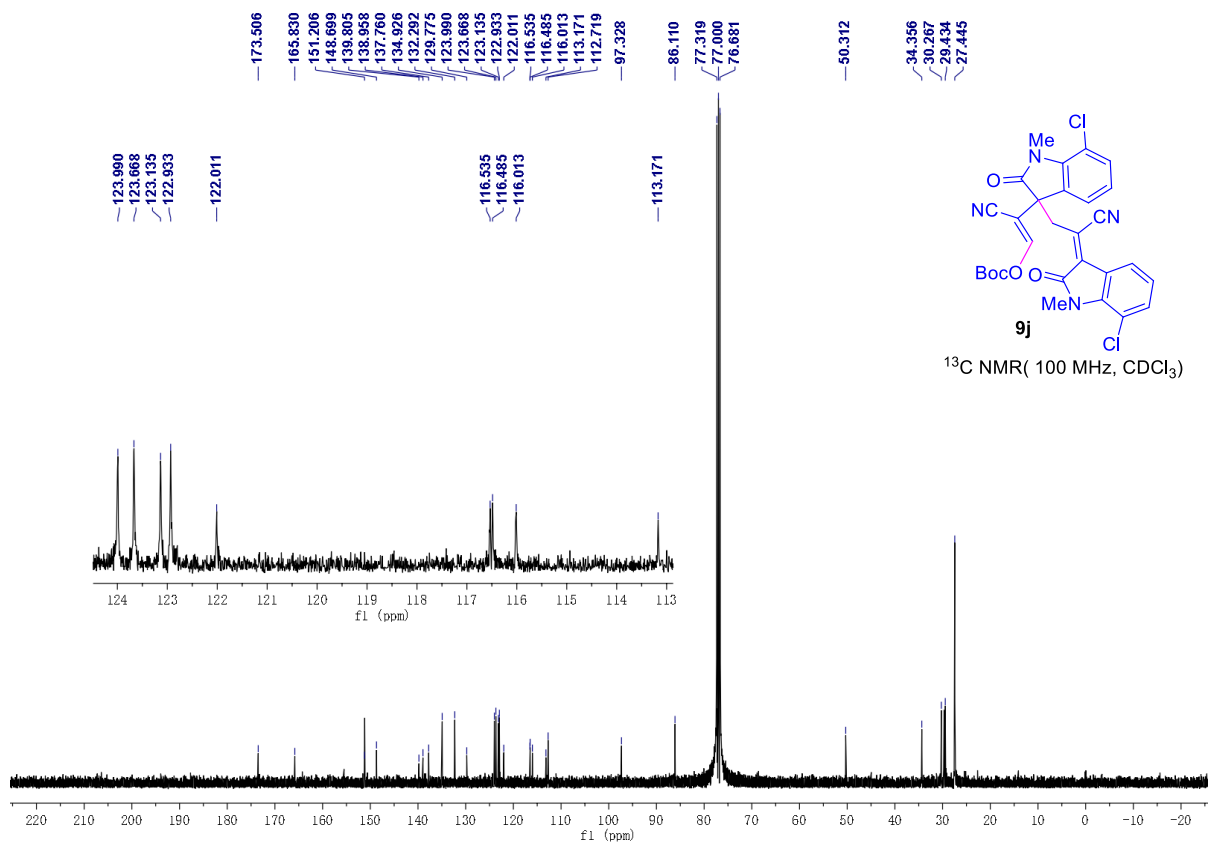

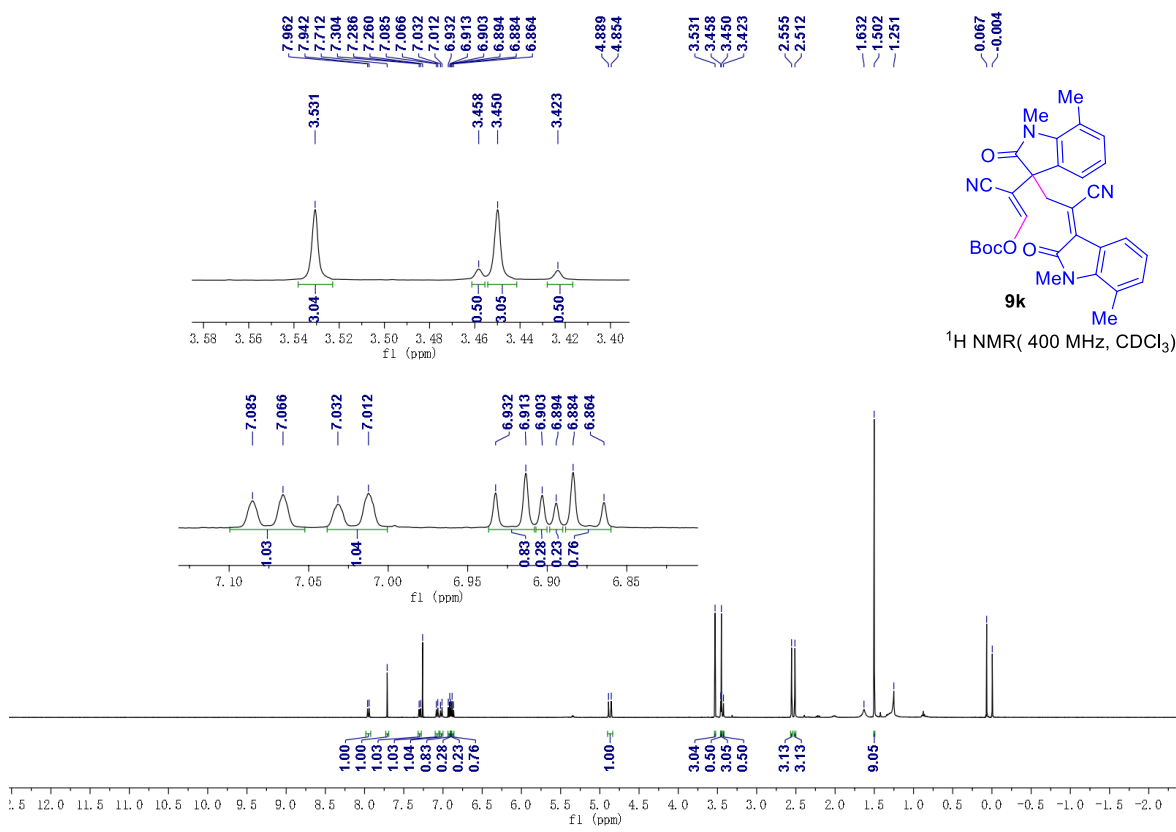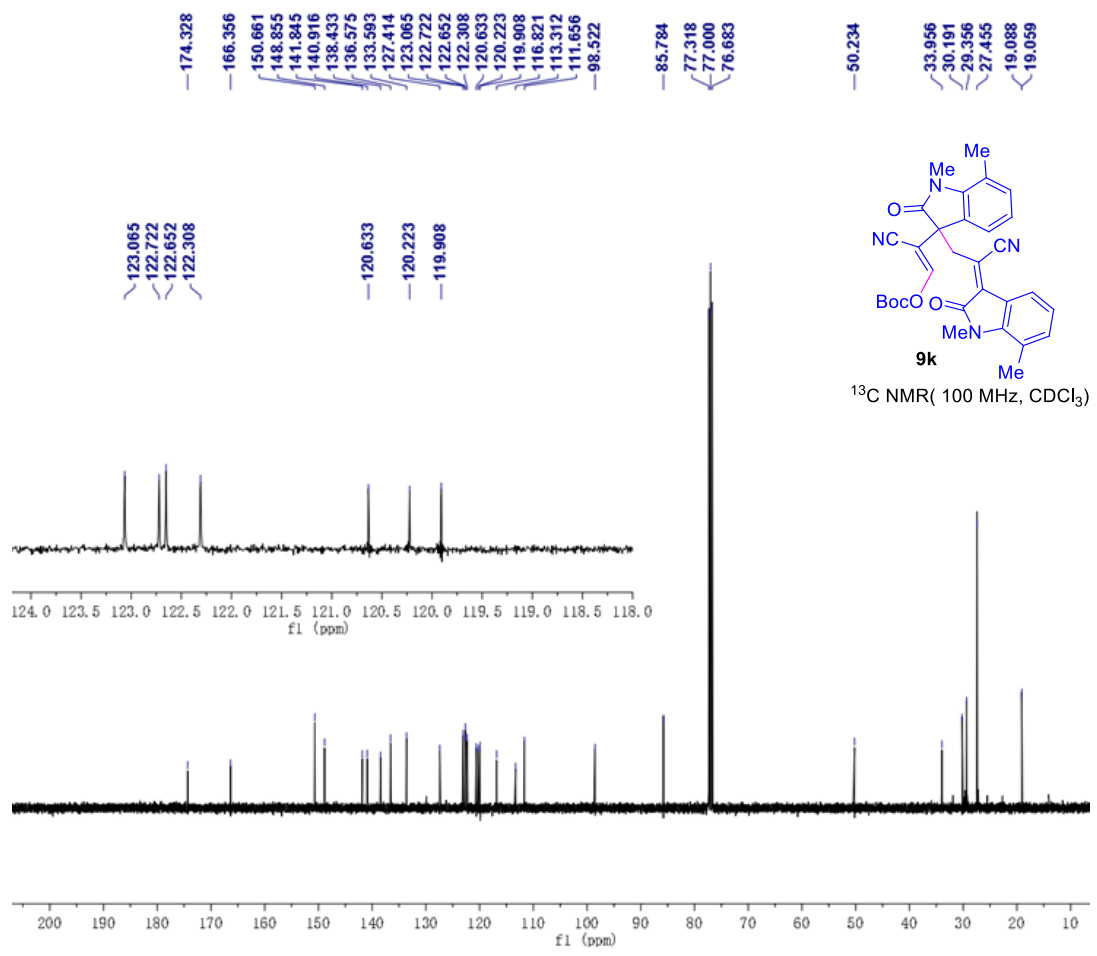

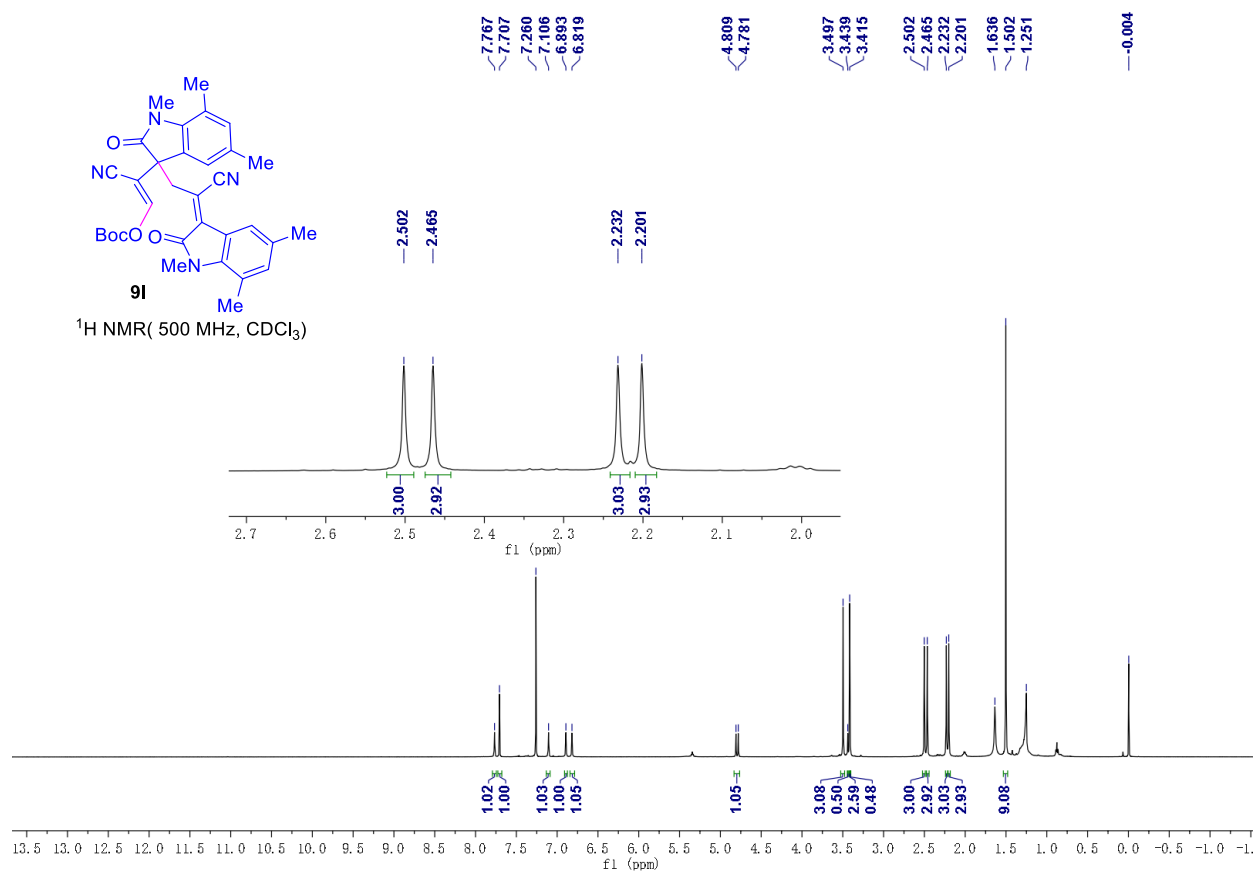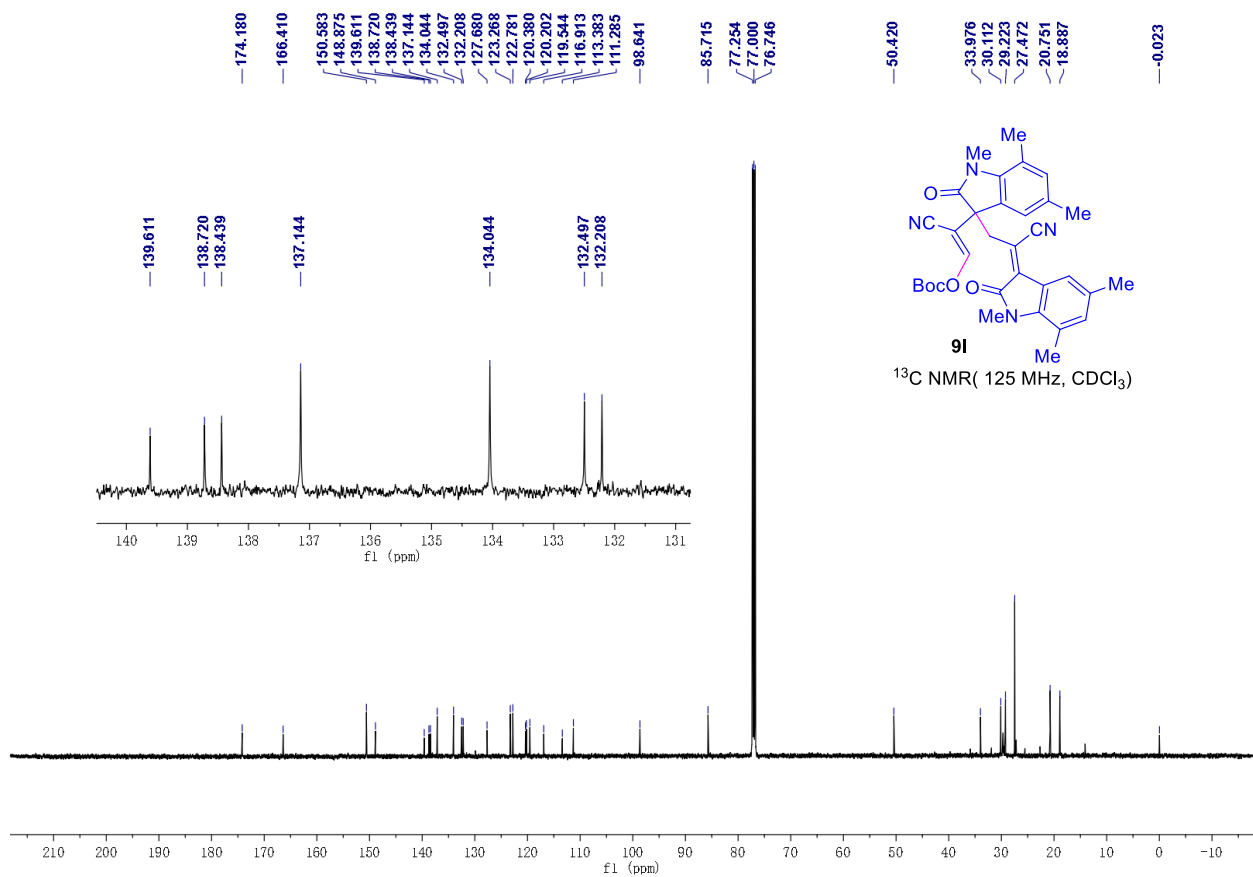

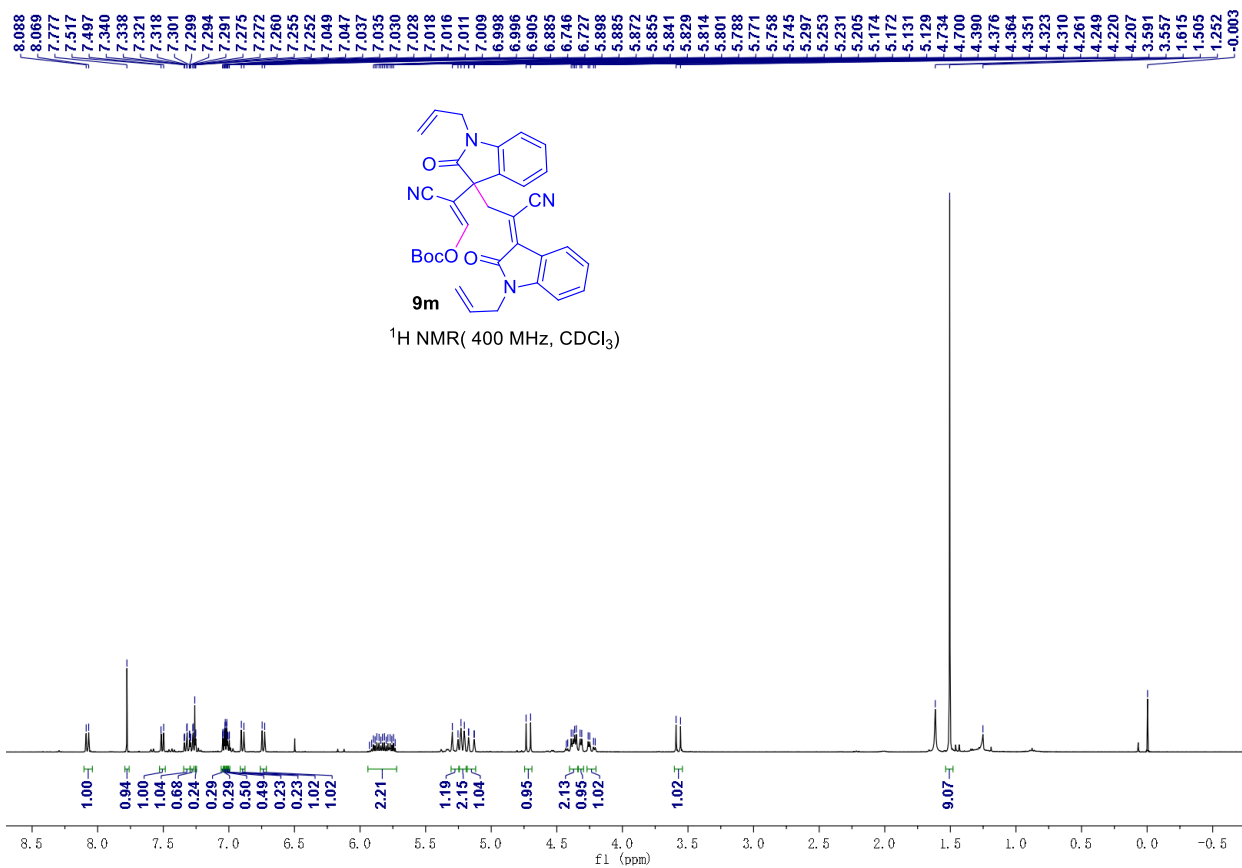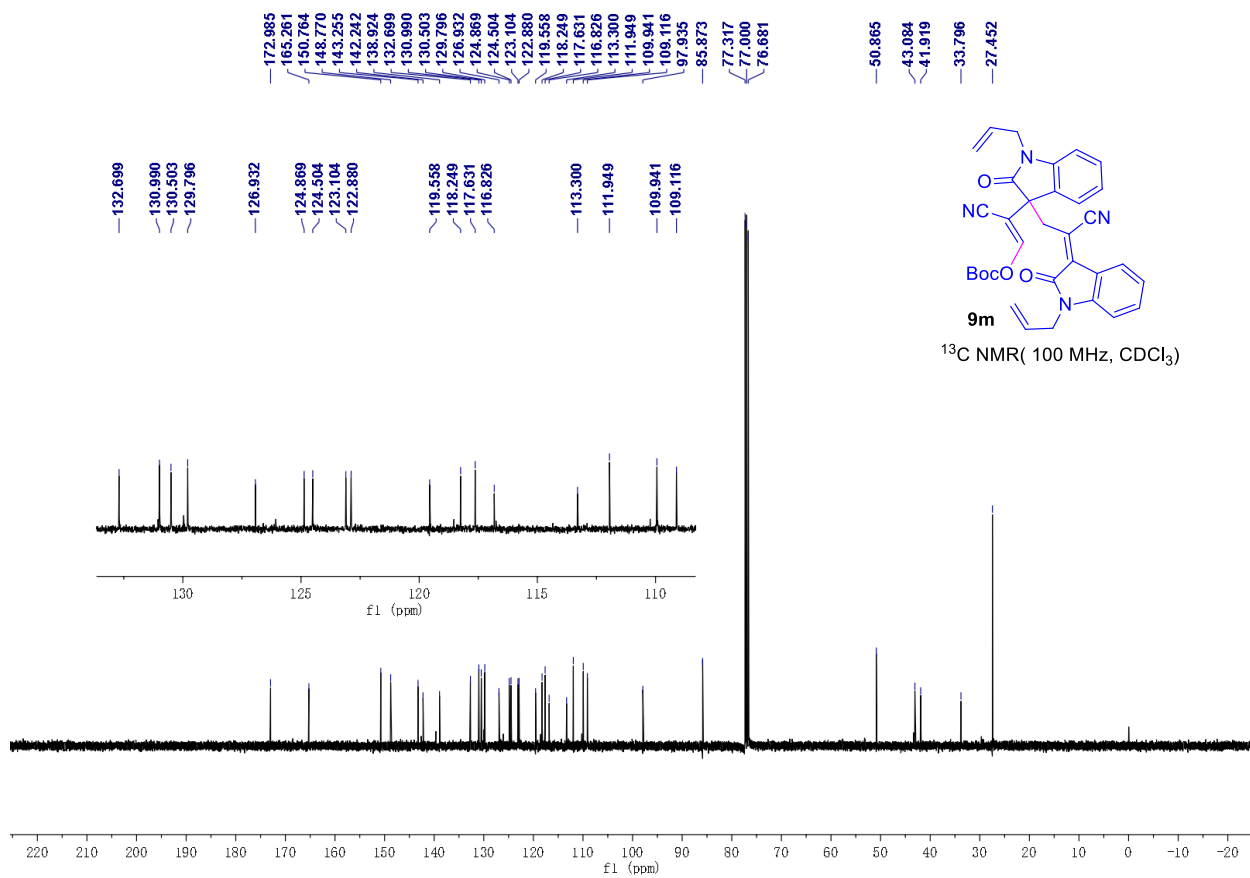

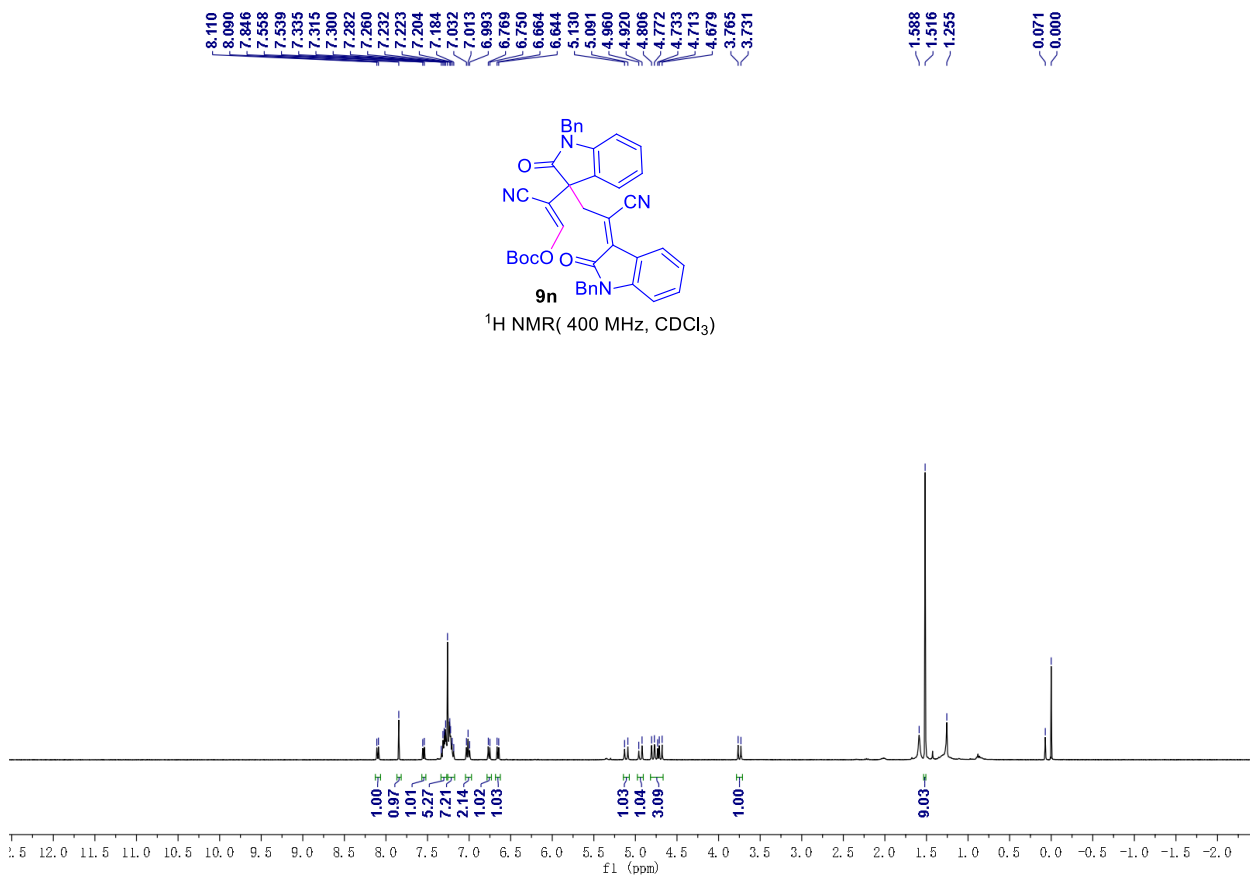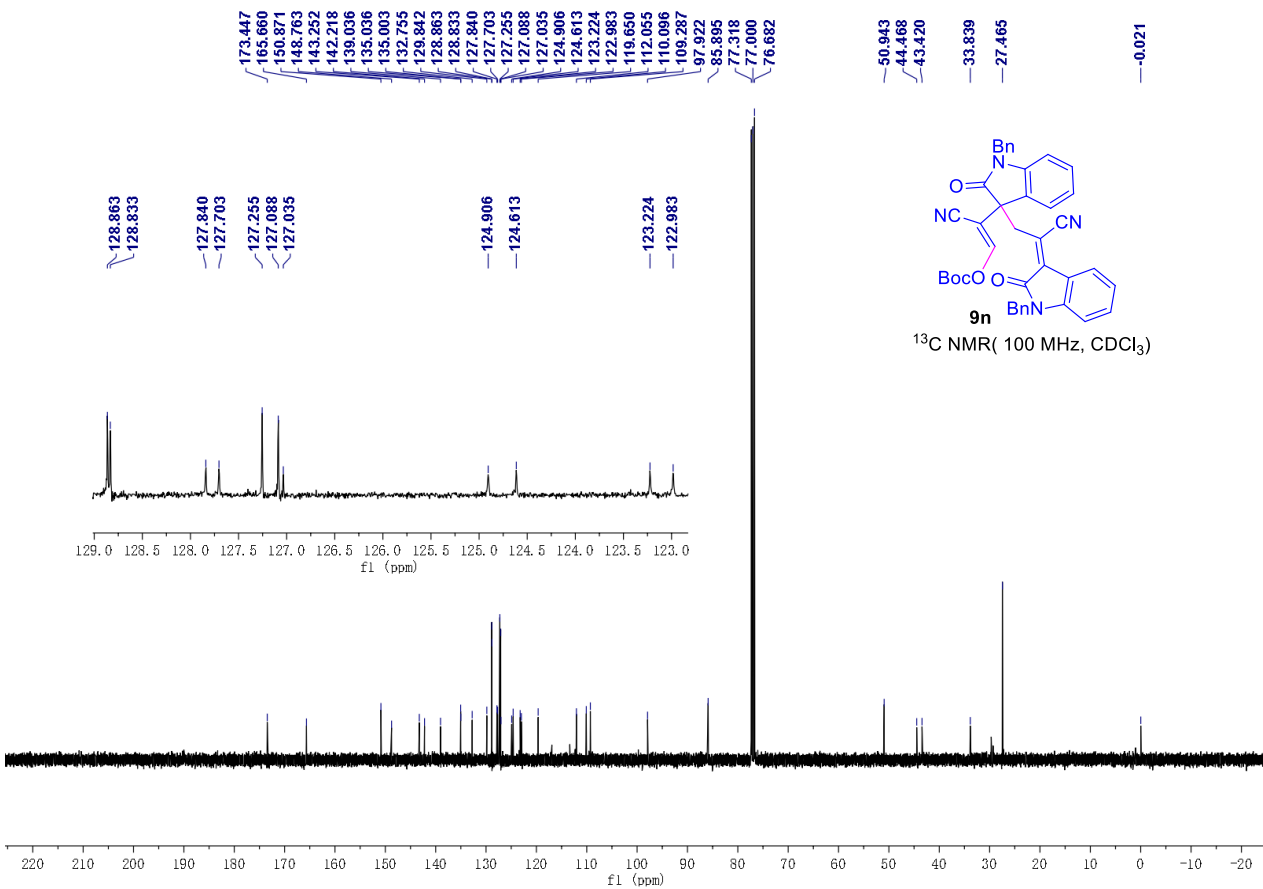

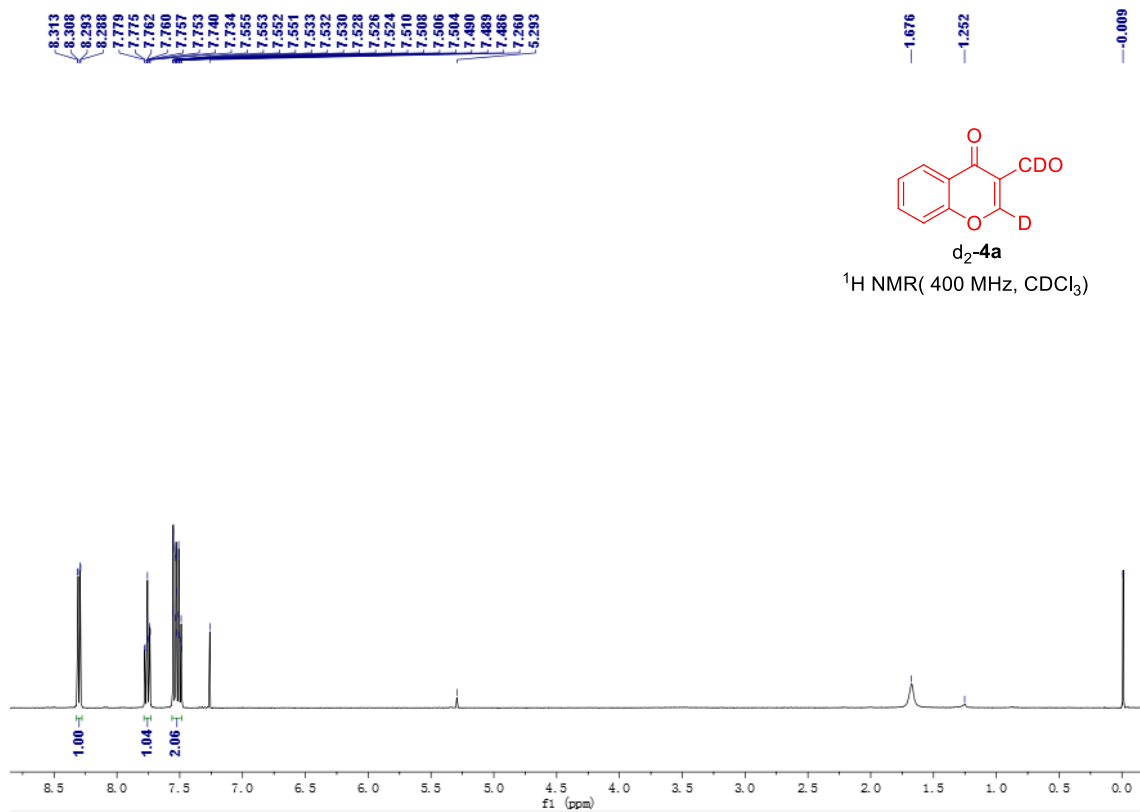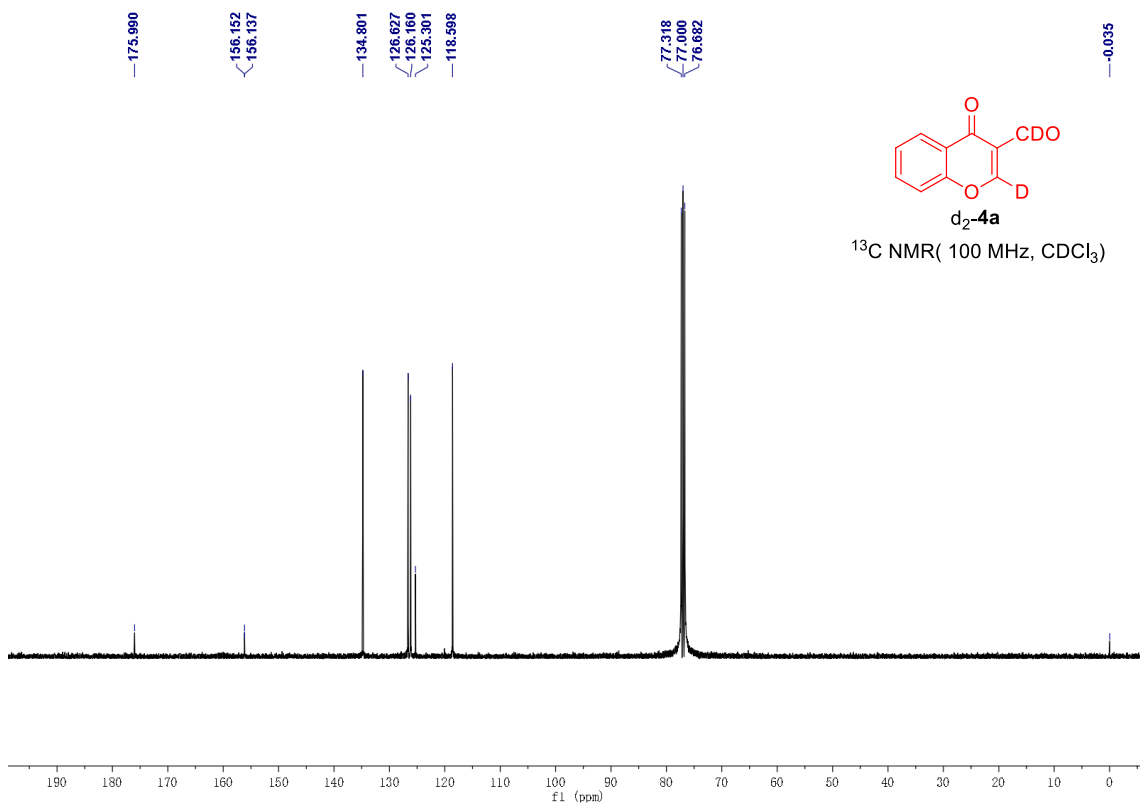

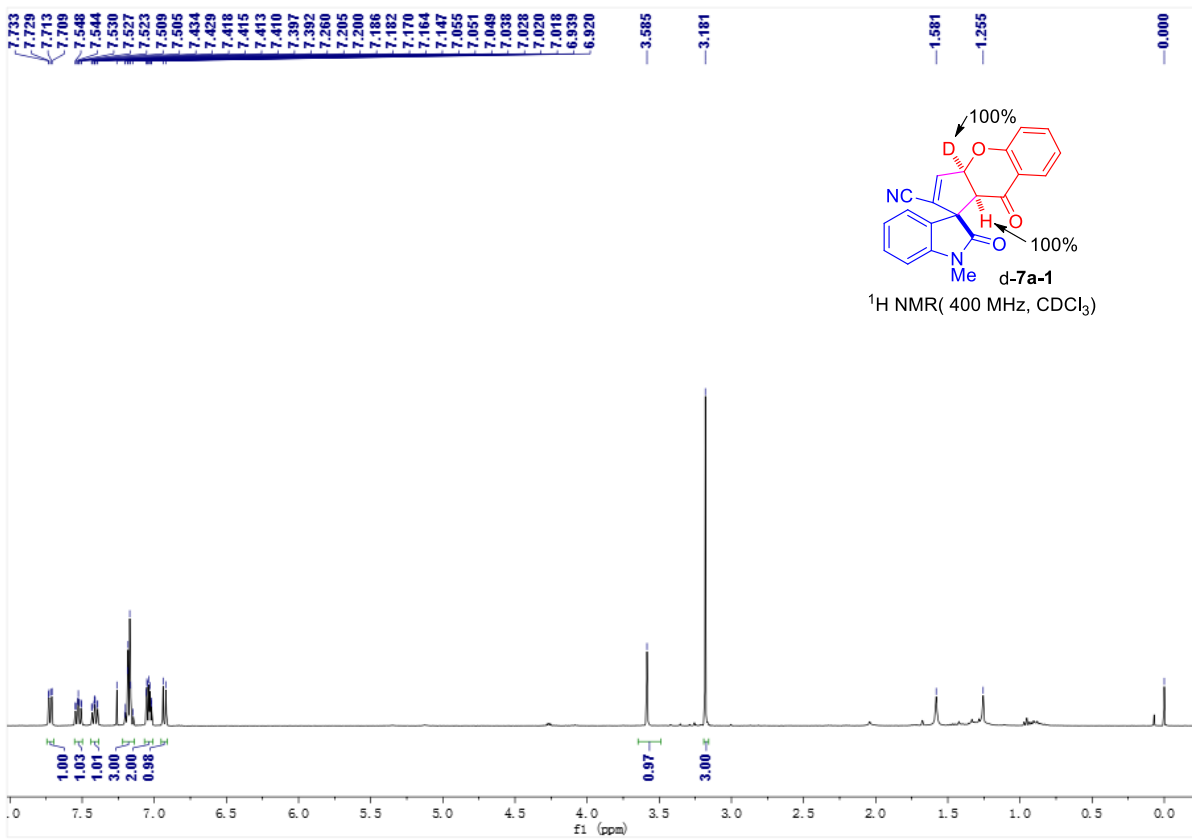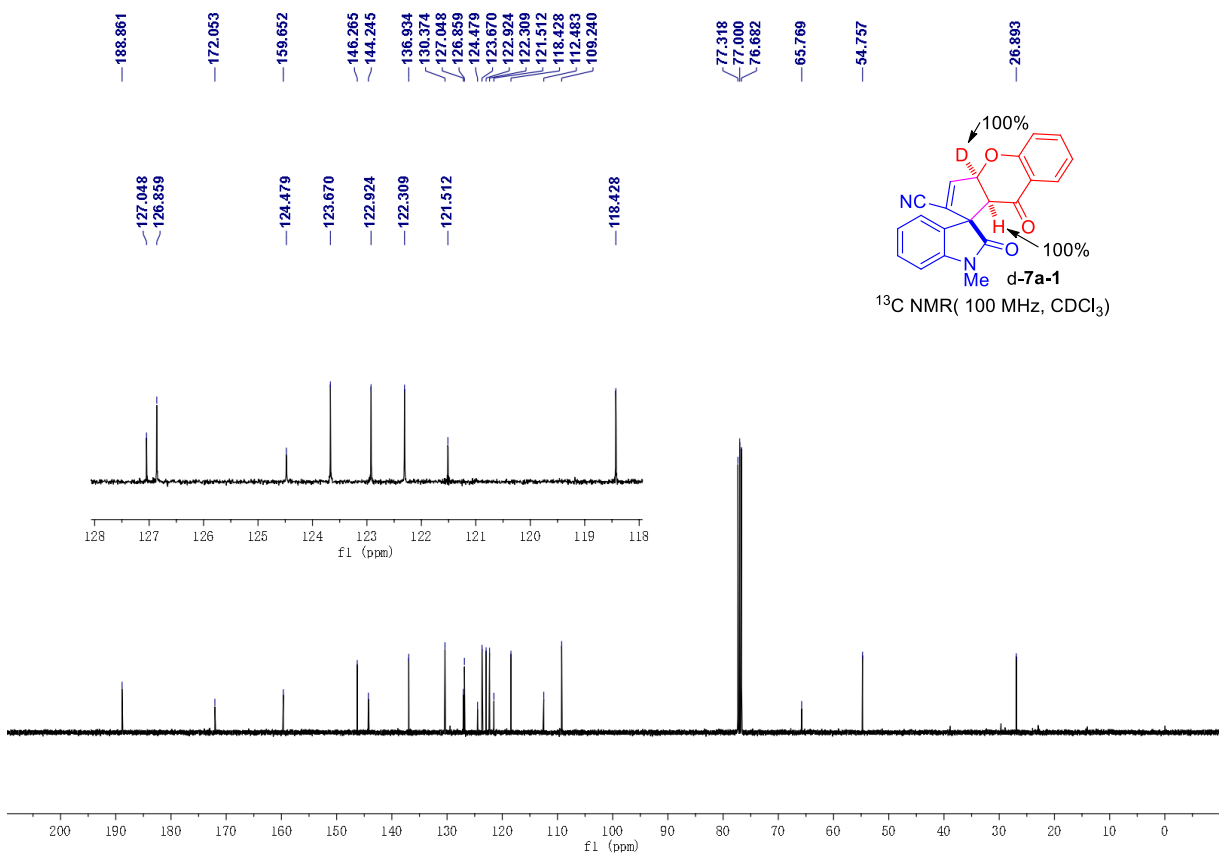



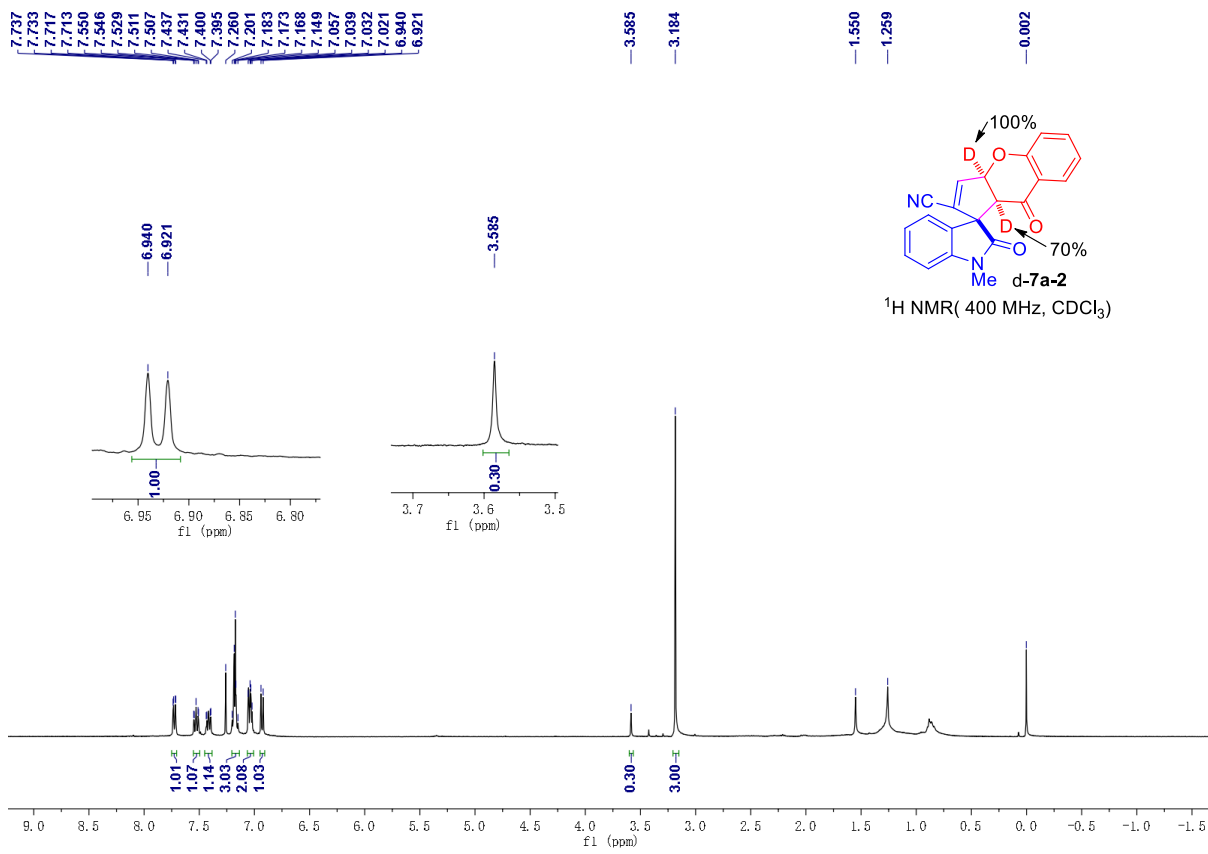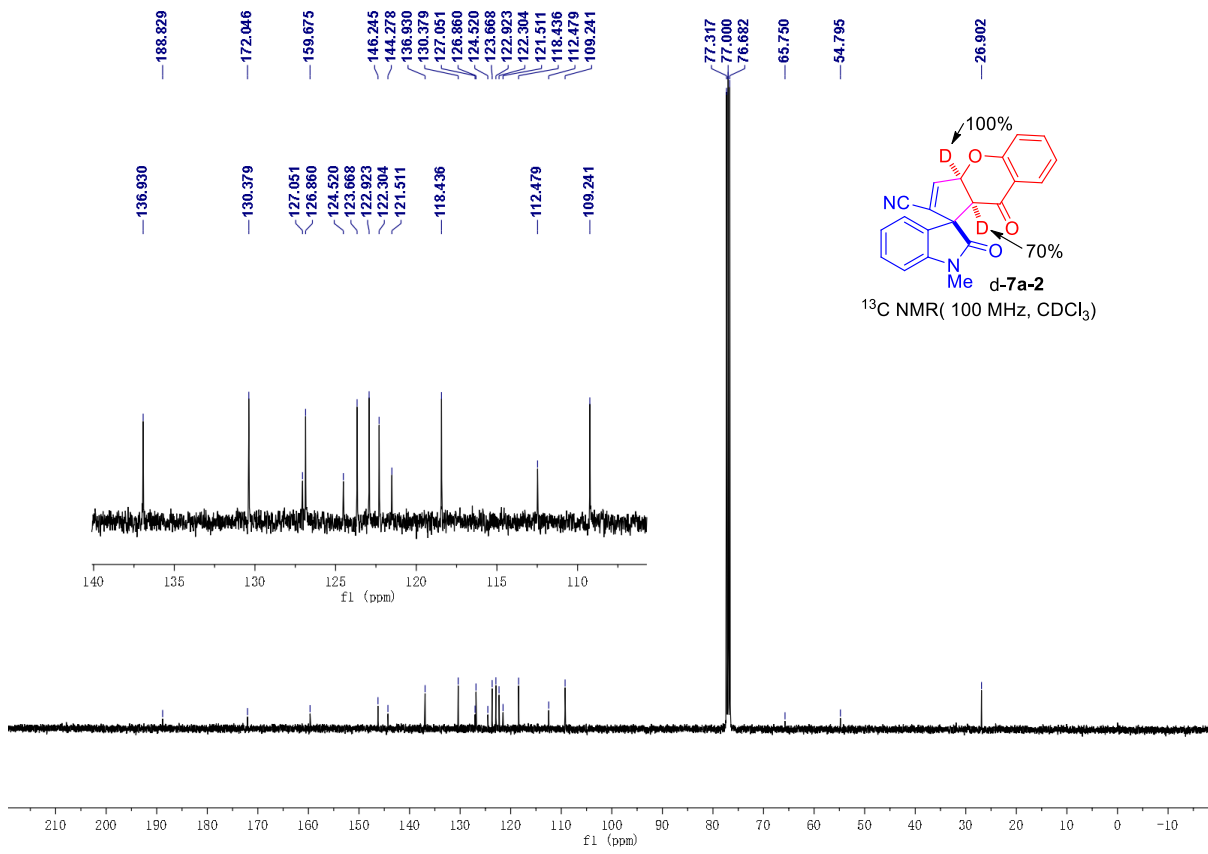

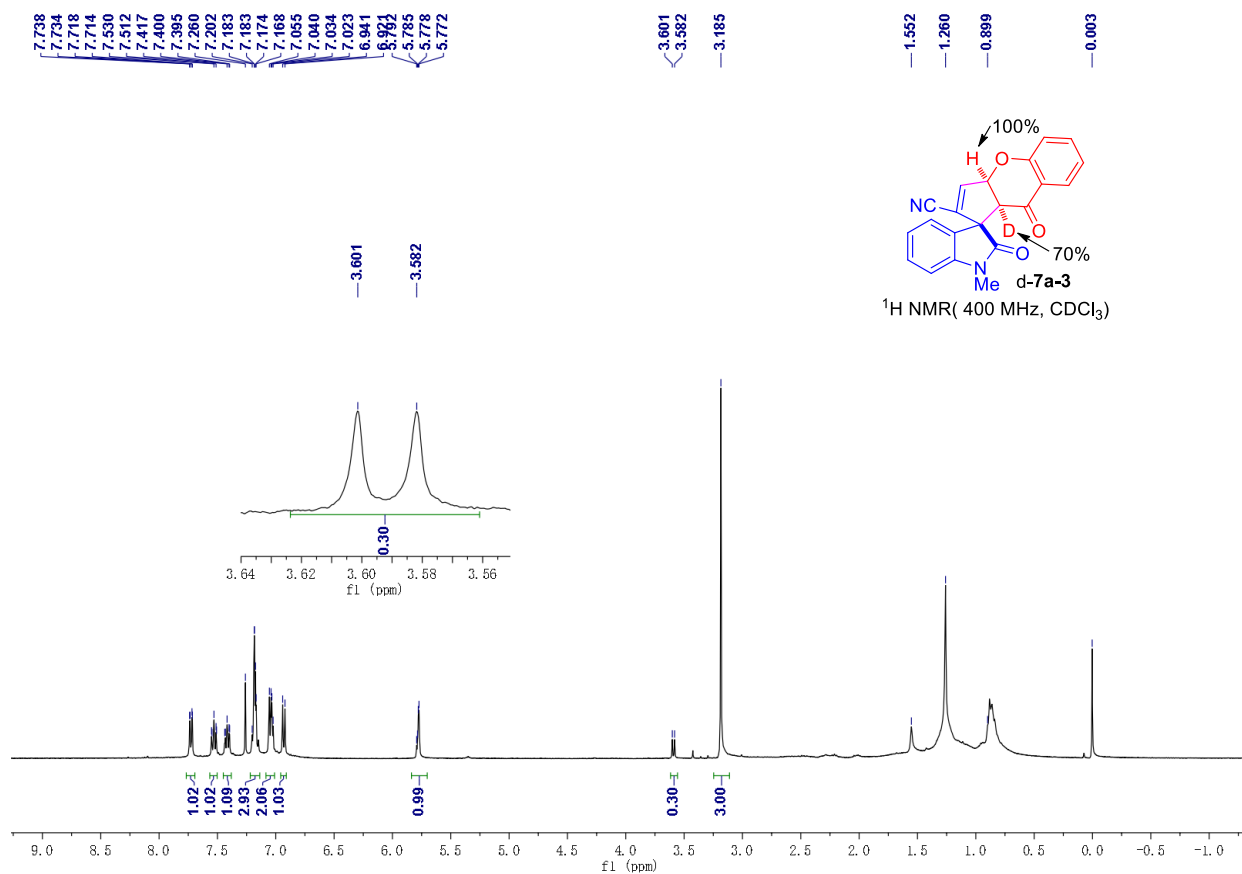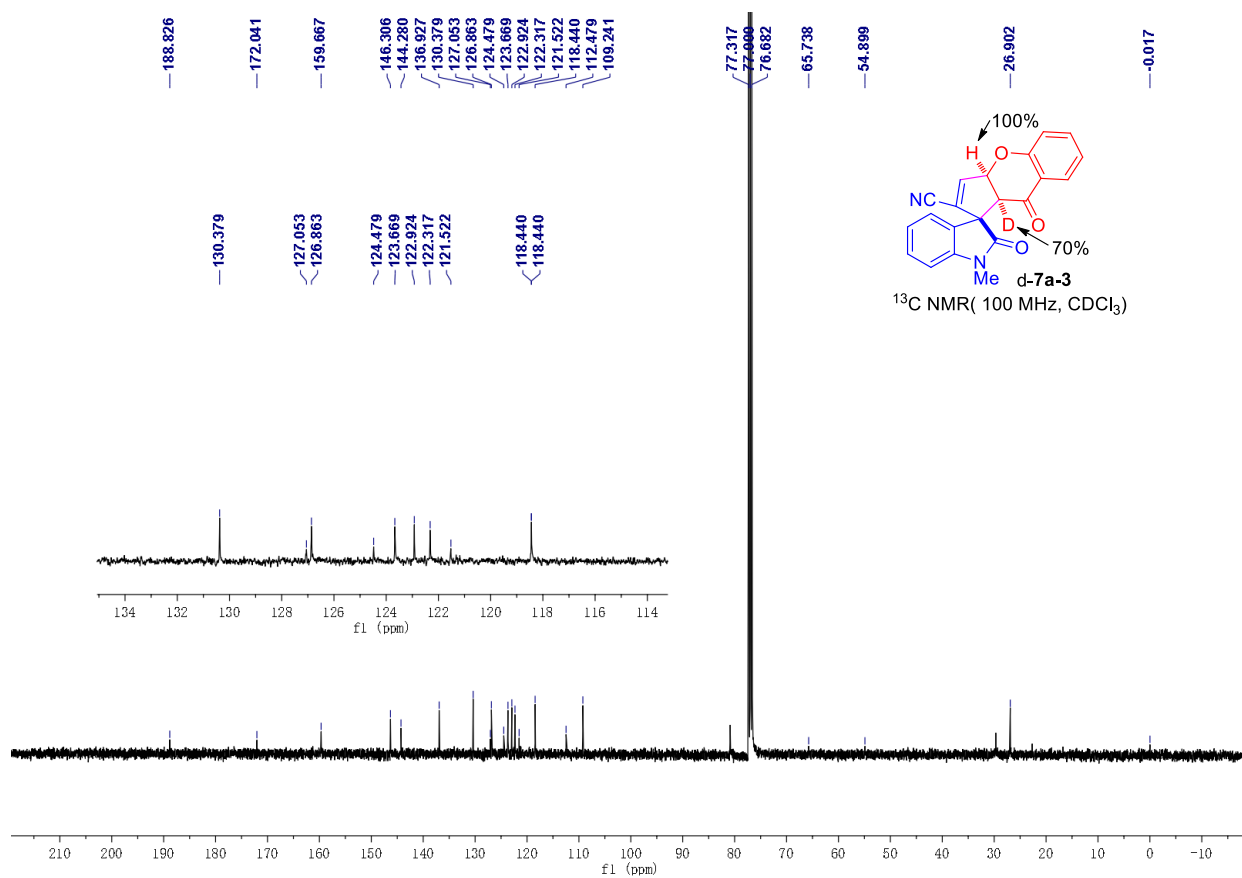

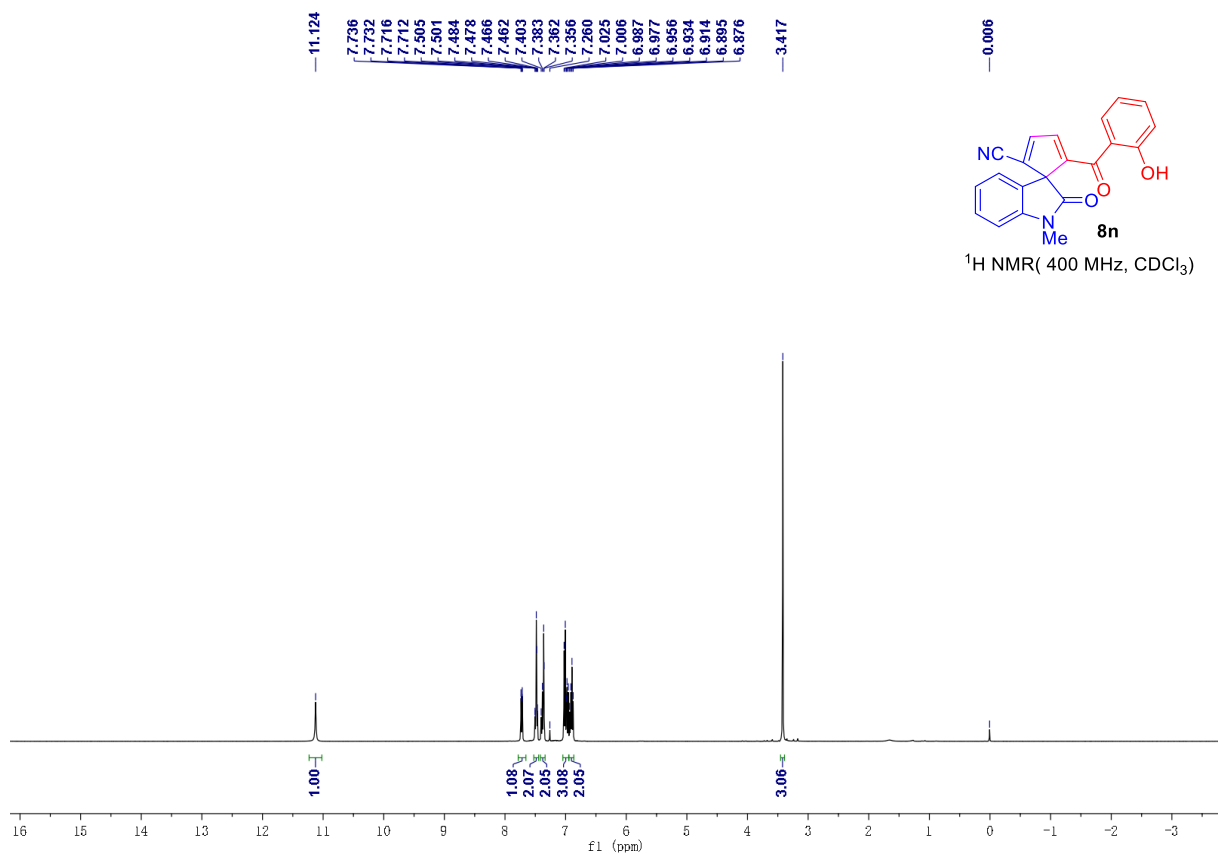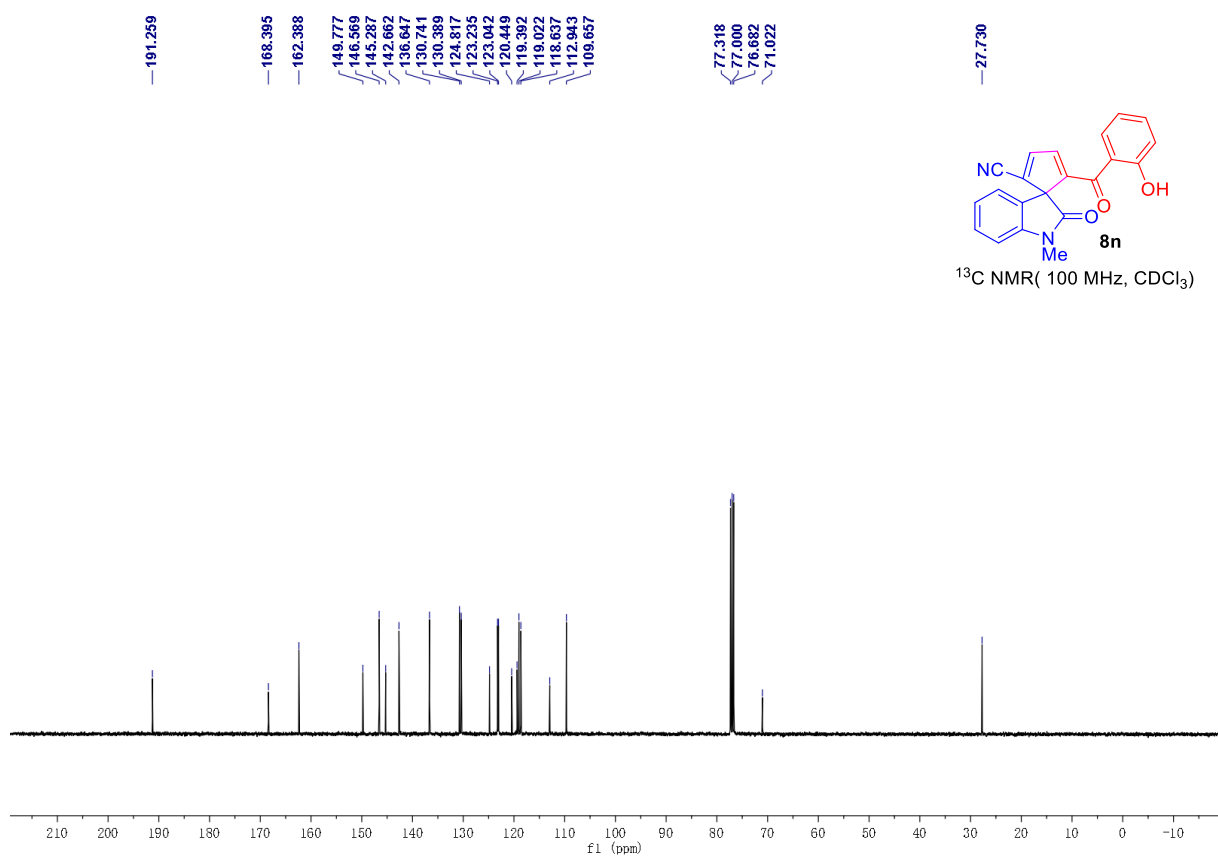

Supplement: d1qo00575h1.pdf [file d1qo00575h1.pdf]
